# Supplementary material for: Design, Synthesis, and Development of Pyrazolo[1,5-a]pyrimidine Derivatives as a Novel Series of Selective PI3Kδ Inhibitors: Part II—Benzimidazole Derivatives
Source: MDPI journal article supplement (doi:10.3390/ph15080927), 2022-07-27
Supplement: s1 [file s1]

## Supplementary data

for

### **Design, synthesis, and development of pyrazolo[1,5-*a*]pyrimidine derivatives as a novel series of selective PI3K $\delta$ inhibitors. Part II – Benzimidazole derivatives.**

Mariola Stypik<sup>1,2\*</sup>, Stanisław Michałek<sup>1,2</sup>, Nina Orłowska<sup>1,2</sup>, Marcin Zagozda<sup>1</sup>, Maciej Dziachan<sup>1</sup>, Martyna Banach<sup>1</sup>, Paweł Turowski<sup>1</sup>, Paweł Gunerka<sup>1</sup>, Daria Zdżalik-Bielecka<sup>1</sup>, Aleksandra Stańczak<sup>1</sup>, Urszula Kędzierska<sup>1</sup>, Krzysztof Mulewski<sup>1</sup>, Damian Smuga<sup>1</sup>, Wioleta Maruszak<sup>1</sup>, Lidia Gurba-Bryśkiewicz<sup>1</sup>, Zbigniew Ochal<sup>2</sup>, Mateusz Mach<sup>1</sup>, Beata Zygmunt<sup>1</sup>, Jerzy Pieczykolan<sup>1</sup>, Krzysztof Dubiel<sup>1</sup>, Maciej Wieczorek<sup>1</sup>

<sup>1</sup> Celon Pharma S.A., R&D Centre, Marymoncka 15, 05-152 Kazuń Nowy, Poland

<sup>2</sup> Warsaw University of Technology, Faculty of Chemistry, Noakowskiego 3, 00-664 Warsaw, Poland

\*corresponding author: mariola.stypik@celonpharma.com

<sup>1</sup>H NMR, <sup>13</sup>C NMR and HRMS supplementary figures of the final compounds **5-9**, **11-12**, **16-38** and **40-54**

## INDEX

|                                                      |    |
|------------------------------------------------------|----|
| Compound 5 $^1\text{H}$ NMR and $^{13}\text{C}$ NMR  | 5  |
| Compound 5 HRMS                                      | 6  |
| Compound 6 $^1\text{H}$ NMR and $^{13}\text{C}$ NMR  | 7  |
| Compound 6 HRMS                                      | 8  |
| Compound 7 $^1\text{H}$ NMR and $^{13}\text{C}$ NMR  | 9  |
| Compound 7 HRMS                                      | 10 |
| Compound 8 $^1\text{H}$ NMR and $^{13}\text{C}$ NMR  | 11 |
| Compound 8 HRMS                                      | 12 |
| Compound 9 $^1\text{H}$ NMR and $^{13}\text{C}$ NMR  | 13 |
| Compound 9 HRMS                                      | 14 |
| Compound 11 $^1\text{H}$ NMR and $^{13}\text{C}$ NMR | 15 |
| Compound 11 HRMS                                     | 16 |
| Compound 12 $^1\text{H}$ NMR and $^{13}\text{C}$ NMR | 17 |
| Compound 12 HRMS                                     | 18 |
| Compound 16 $^1\text{H}$ NMR and $^{13}\text{C}$ NMR | 19 |
| Compound 16 HRMS                                     | 20 |
| Compound 17 $^1\text{H}$ NMR and $^{13}\text{C}$ NMR | 21 |
| Compound 17 HRMS                                     | 22 |
| Compound 18 $^1\text{H}$ NMR and $^{13}\text{C}$ NMR | 23 |
| Compound 18 HRMS                                     | 24 |
| Compound 19 $^1\text{H}$ NMR and $^{13}\text{C}$ NMR | 25 |
| Compound 19 HRMS                                     | 26 |
| Compound 20 $^1\text{H}$ NMR and $^{13}\text{C}$ NMR | 27 |
| Compound 20 HRMS                                     | 28 |
| Compound 21 $^1\text{H}$ NMR and $^{13}\text{C}$ NMR | 29 |
| Compound 21 HRMS                                     | 30 |
| Compound 22 $^1\text{H}$ NMR and $^{13}\text{C}$ NMR | 31 |
| Compound 22 HRMS                                     | 32 |
| Compound 23 $^1\text{H}$ NMR and $^{13}\text{C}$ NMR | 33 |
| Compound 23 HRMS                                     | 34 |
| Compound 24 $^1\text{H}$ NMR and $^{13}\text{C}$ NMR | 35 |
| Compound 24 HRMS                                     | 36 |
| Compound 25 $^1\text{H}$ NMR and $^{13}\text{C}$ NMR | 37 |
| Compound 25 HRMS                                     | 38 |
| Compound 26 $^1\text{H}$ NMR and $^{13}\text{C}$ NMR | 39 |
| Compound 26 HRMS                                     | 40 |

|                                                      |    |
|------------------------------------------------------|----|
| Compound 27 $^1\text{H}$ NMR and $^{13}\text{C}$ NMR | 41 |
| Compound 27 HRMS                                     | 42 |
| Compound 28 $^1\text{H}$ NMR and $^{13}\text{C}$ NMR | 43 |
| Compound 28 HRMS                                     | 44 |
| Compound 29 $^1\text{H}$ NMR and $^{13}\text{C}$ NMR | 45 |
| Compound 29 HRMS                                     | 46 |
| Compound 30 $^1\text{H}$ NMR and $^{13}\text{C}$ NMR | 47 |
| Compound 30 HRMS                                     | 48 |
| Compound 31 $^1\text{H}$ NMR and $^{13}\text{C}$ NMR | 49 |
| Compound 31 HRMS                                     | 50 |
| Compound 32 $^1\text{H}$ NMR and $^{13}\text{C}$ NMR | 51 |
| Compound 32 HRMS                                     | 52 |
| Compound 33 $^1\text{H}$ NMR and $^{13}\text{C}$ NMR | 53 |
| Compound 33 HRMS                                     | 54 |
| Compound 34 $^1\text{H}$ NMR and $^{13}\text{C}$ NMR | 55 |
| Compound 34 HRMS                                     | 56 |
| Compound 35 $^1\text{H}$ NMR and $^{13}\text{C}$ NMR | 57 |
| Compound 35 HRMS                                     | 58 |
| Compound 36 $^1\text{H}$ NMR and $^{13}\text{C}$ NMR | 59 |
| Compound 36 HRMS                                     | 60 |
| Compound 37 $^1\text{H}$ NMR and $^{13}\text{C}$ NMR | 61 |
| Compound 37 HRMS                                     | 62 |
| Compound 38 $^1\text{H}$ NMR and $^{13}\text{C}$ NMR | 63 |
| Compound 38 HRMS                                     | 64 |
| Compound 40 $^1\text{H}$ NMR and $^{13}\text{C}$ NMR | 65 |
| Compound 40 HRMS                                     | 66 |
| Compound 41 $^1\text{H}$ NMR and $^{13}\text{C}$ NMR | 67 |
| Compound 41 HRMS                                     | 68 |
| Compound 42 $^1\text{H}$ NMR and $^{13}\text{C}$ NMR | 69 |
| Compound 42 HRMS                                     | 70 |
| Compound 43 $^1\text{H}$ NMR and $^{13}\text{C}$ NMR | 71 |
| Compound 43 HRMS                                     | 72 |
| Compound 44 $^1\text{H}$ NMR and $^{13}\text{C}$ NMR | 73 |
| Compound 44 HRMS                                     | 74 |
| Compound 45 $^1\text{H}$ NMR and $^{13}\text{C}$ NMR | 75 |
| Compound 45 HRMS                                     | 76 |
| Compound 46 $^1\text{H}$ NMR and $^{13}\text{C}$ NMR | 77 |

|                                                      |     |
|------------------------------------------------------|-----|
| Compound 46 HRMS                                     | 78  |
| Compound 47 $^1\text{H}$ NMR and $^{13}\text{C}$ NMR | 79  |
| Compound 47 HRMS                                     | 80  |
| Compound 48 $^1\text{H}$ NMR and $^{13}\text{C}$ NMR | 81  |
| Compound 48 HRMS                                     | 82  |
| Compound 49 $^1\text{H}$ NMR and $^{13}\text{C}$ NMR | 83  |
| Compound 49 HRMS                                     | 84  |
| Compound 50 $^1\text{H}$ NMR and $^{13}\text{C}$ NMR | 85  |
| Compound 50 HRMS                                     | 86  |
| Compound 51 $^1\text{H}$ NMR and $^{13}\text{C}$ NMR | 87  |
| Compound 51 HRMS                                     | 88  |
| Compound 52 $^1\text{H}$ NMR and $^{13}\text{C}$ NMR | 89  |
| Compound 52 HRMS                                     | 90  |
| Compound 53 $^1\text{H}$ NMR and $^{13}\text{C}$ NMR | 91  |
| Compound 53 HRMS                                     | 92  |
| Compound 54 $^1\text{H}$ NMR and $^{13}\text{C}$ NMR | 93  |
| Compound 54 HRMS                                     | 94  |
| Compound 55 $^1\text{H}$ NMR and $^{13}\text{C}$ NMR | 95  |
| Compound 55 HRMS                                     | 96  |
| Compound 56 $^1\text{H}$ NMR and $^{13}\text{C}$ NMR | 97  |
| Compound 56 HRMS                                     | 98  |
| Compound 57 $^1\text{H}$ NMR and $^{13}\text{C}$ NMR | 99  |
| Compound 57 HRMS                                     | 100 |



# Compound 5

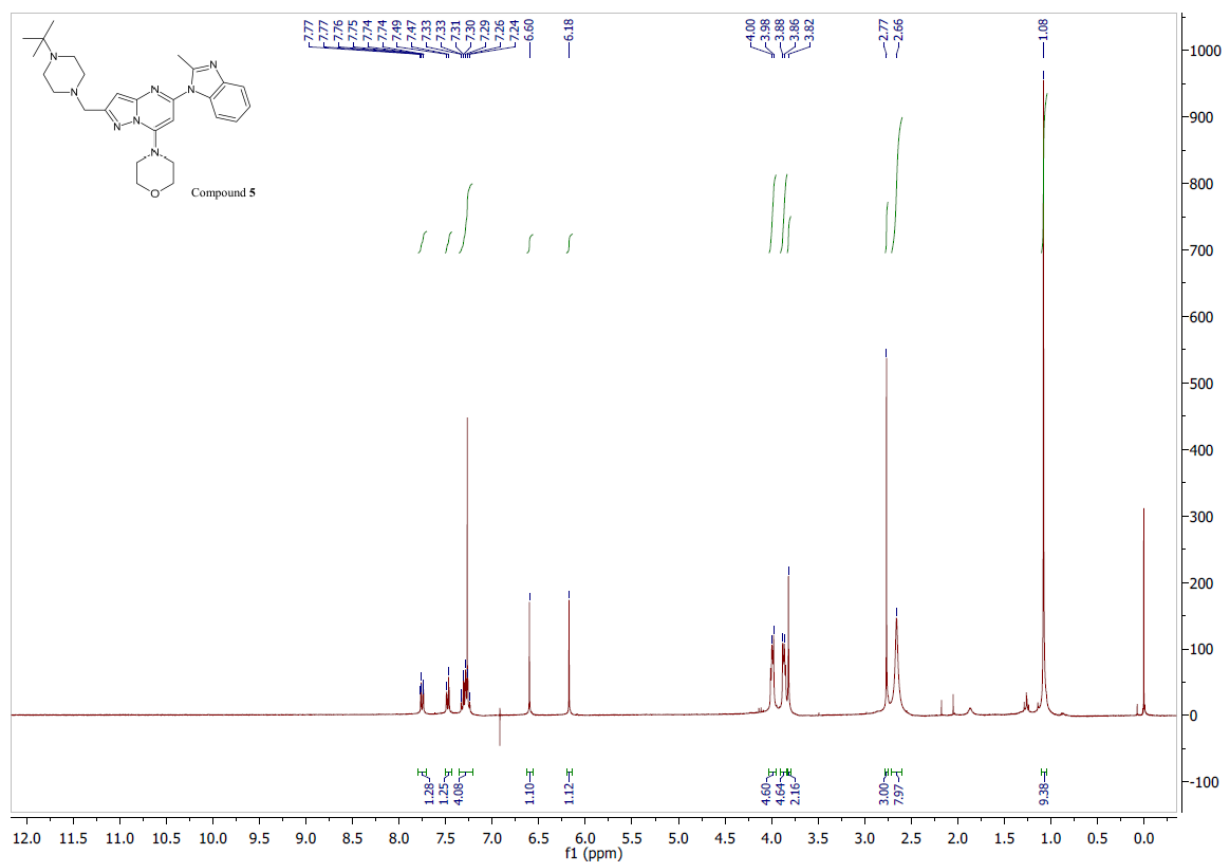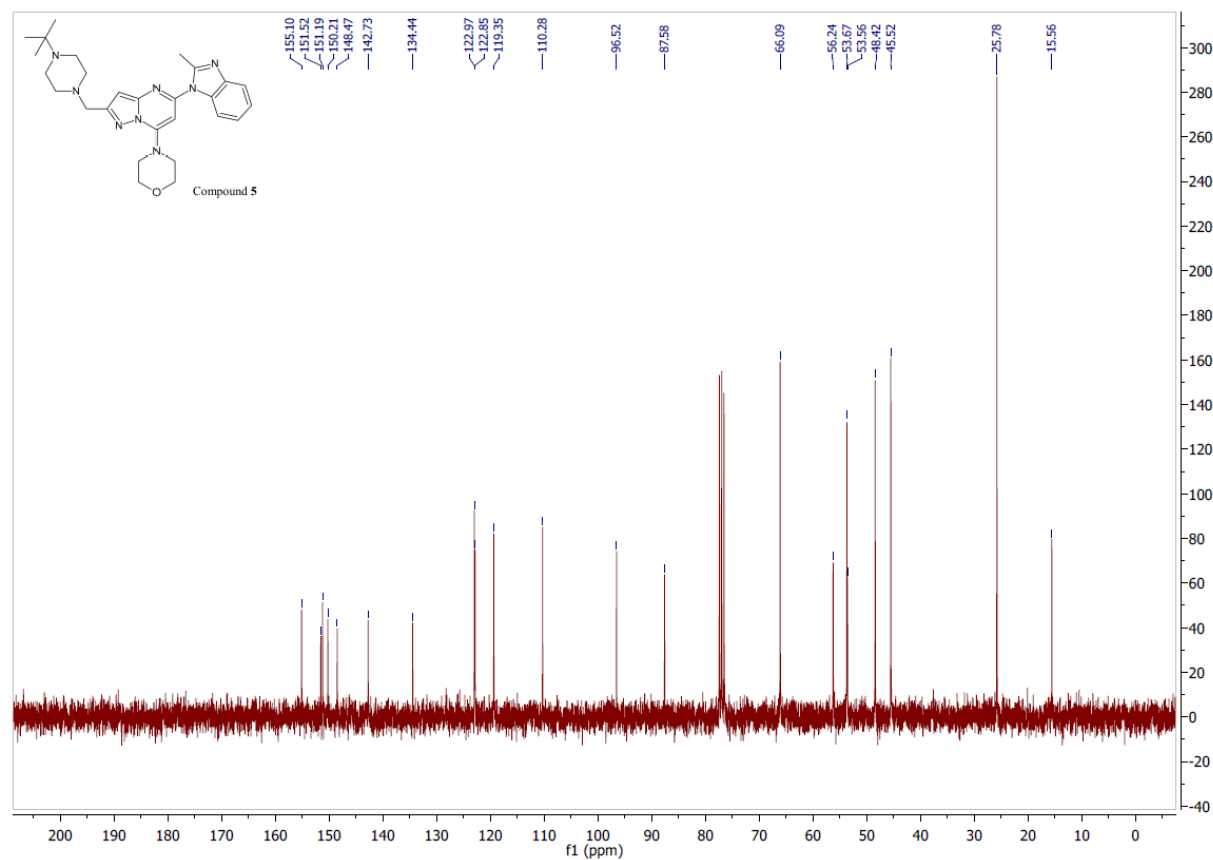

## Compound 5

| Compound Label | Name       | m/z       | RT   | Algorithm       | Mass      |
|----------------|------------|-----------|------|-----------------|-----------|
| Compound 5     | Compound 5 | 489.30884 | 0.24 | Find by Formula | 488.30154 |

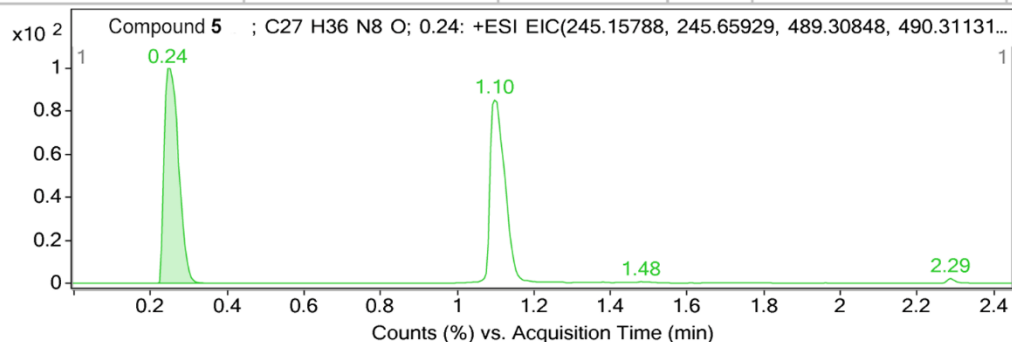

MS Zoomed Spectrum

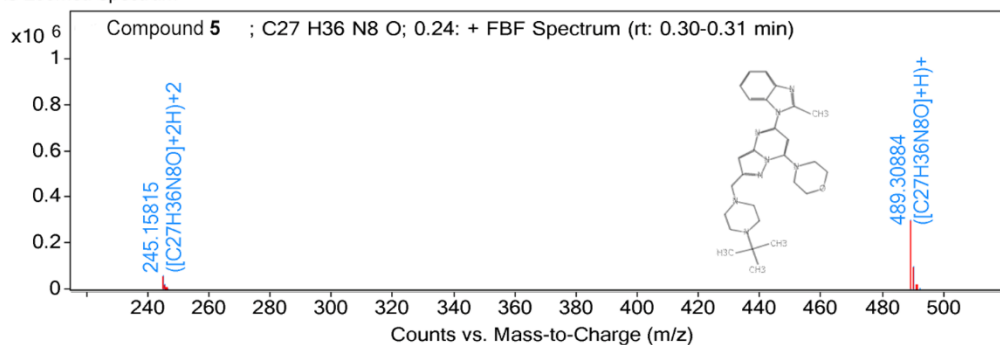

MS Zoomed Spectrum

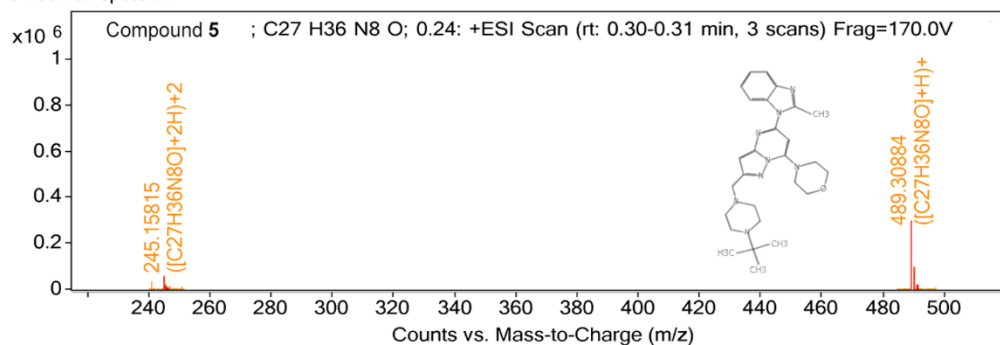

MS Spectrum Peak List

| m/z       | Calc m/z  | Diff(ppm) | z | Abund     | Formula                                          | Ion      |
|-----------|-----------|-----------|---|-----------|--------------------------------------------------|----------|
| 245.15815 | 245.15788 | 1.12      | 2 | 56190     | C <sub>27</sub> H <sub>36</sub> N <sub>8</sub> O | (M+2H)+2 |
| 245.65963 | 245.65929 | 1.38      | 2 | 18164.55  | C <sub>27</sub> H <sub>36</sub> N <sub>8</sub> O | (M+2H)+2 |
| 246.16121 | 246.16067 | 2.2       | 2 | 2663.72   | C <sub>27</sub> H <sub>36</sub> N <sub>8</sub> O | (M+2H)+2 |
| 246.66092 | 246.66202 | -4.46     | 2 | 280.06    | C <sub>27</sub> H <sub>36</sub> N <sub>8</sub> O | (M+2H)+2 |
| 489.30884 | 489.30848 | 0.72      | 1 | 298324.84 | C <sub>27</sub> H <sub>36</sub> N <sub>8</sub> O | (M+H)+   |
| 490.31149 | 490.31131 | 0.37      | 1 | 97178.29  | C <sub>27</sub> H <sub>36</sub> N <sub>8</sub> O | (M+H)+   |
| 491.31367 | 491.31407 | -0.81     | 1 | 14949.13  | C <sub>27</sub> H <sub>36</sub> N <sub>8</sub> O | (M+H)+   |
| 492.31654 | 492.31675 | -0.42     | 1 | 1609.93   | C <sub>27</sub> H <sub>36</sub> N <sub>8</sub> O | (M+H)+   |

--- End Of Report ---

# Compound 6

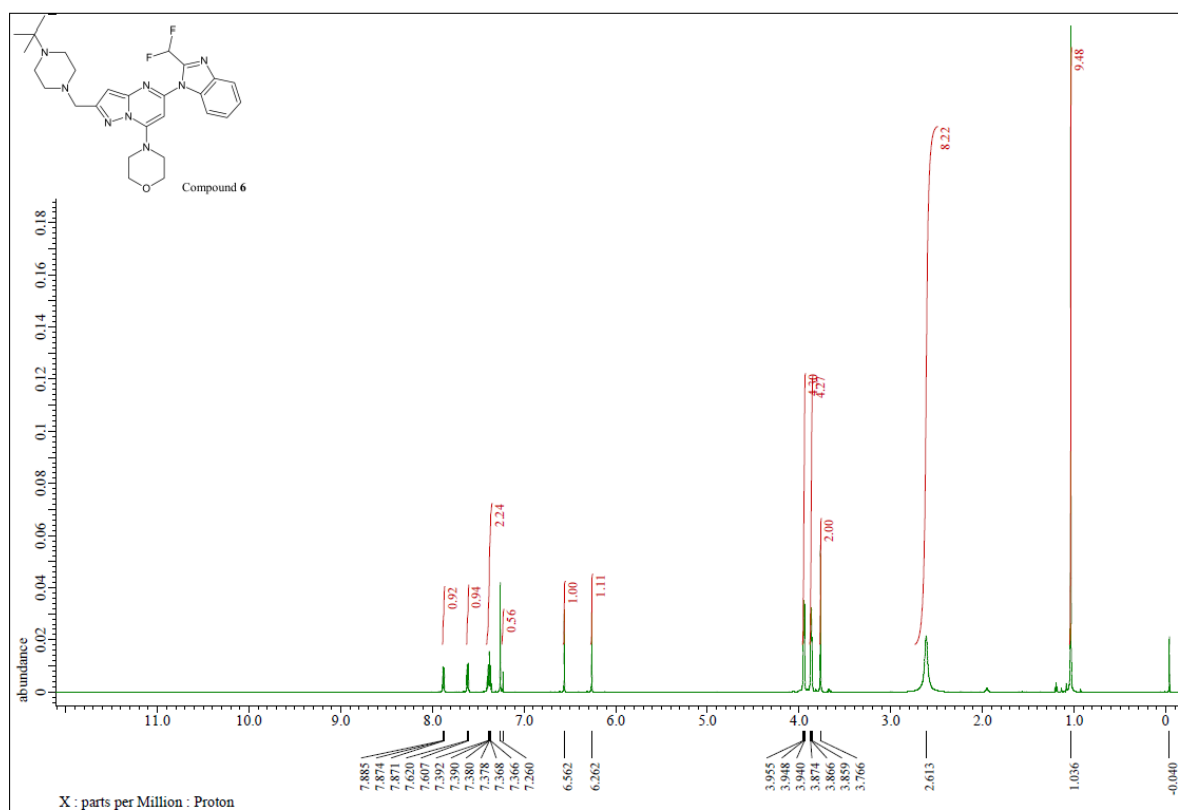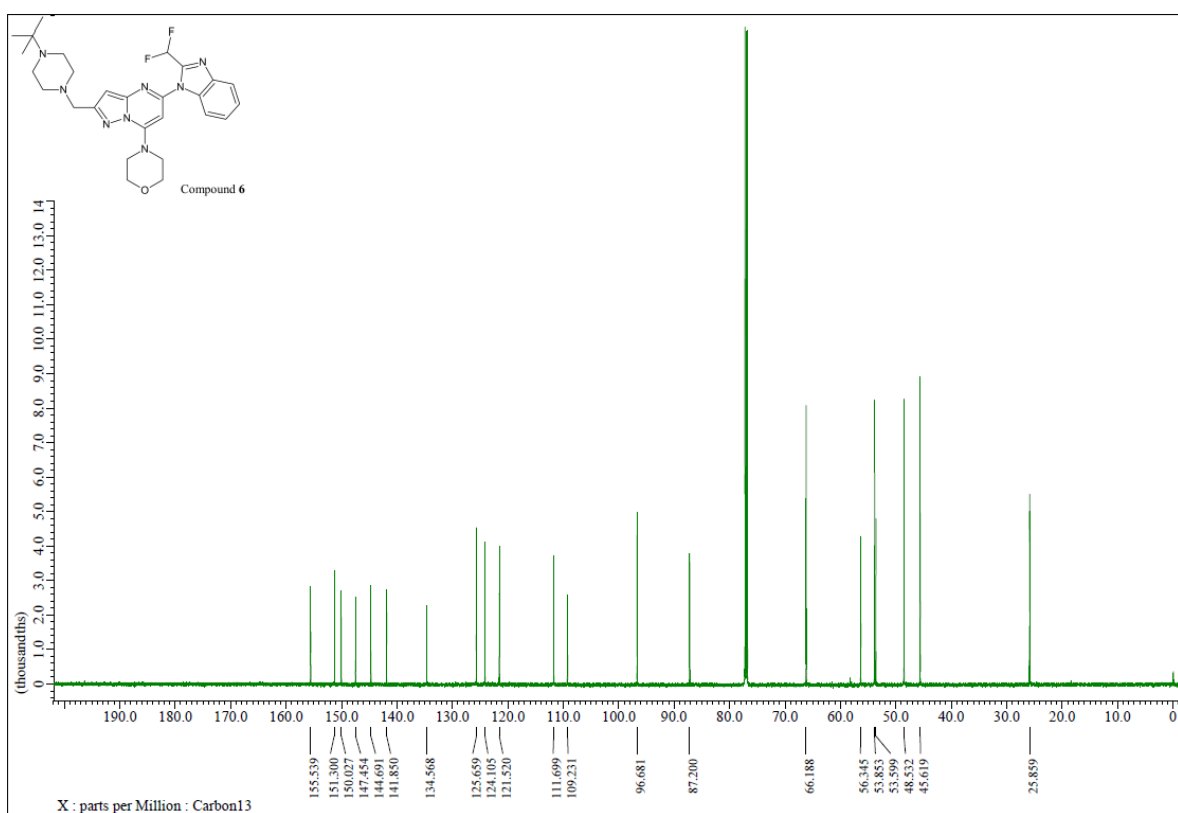

## Compound 6

| Compound Label | Name       | m/z       | RT    | Algorithm       | Mass      |
|----------------|------------|-----------|-------|-----------------|-----------|
| Compound 6     | Compound 6 | 525.29001 | 2.414 | Find by Formula | 524.28269 |

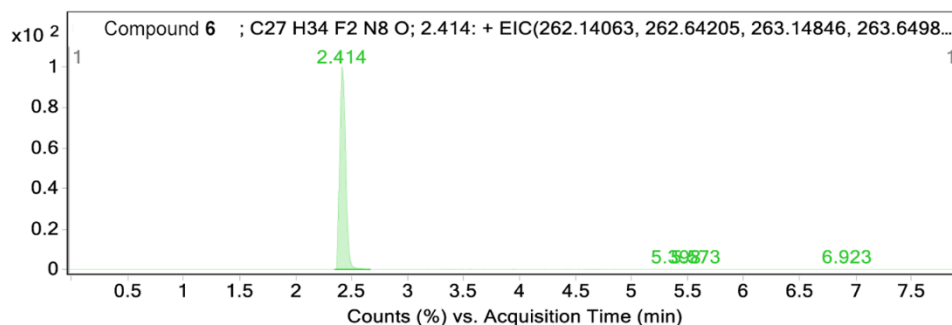

MS Zoomed Spectrum

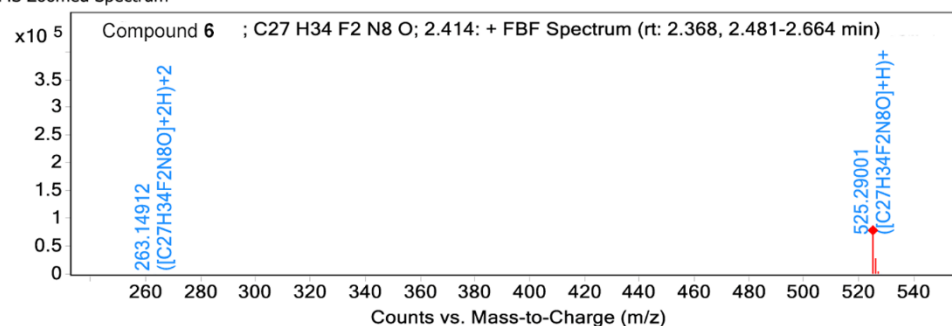

MS Zoomed Spectrum

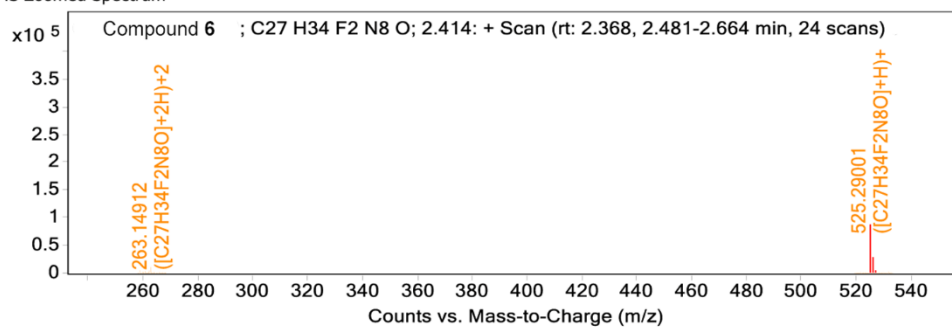

MS Spectrum Peak List

| m/z       | Calc m/z  | Diff(ppm) | z | Abund    | Formula                                                         | Ion      |
|-----------|-----------|-----------|---|----------|-----------------------------------------------------------------|----------|
| 263.14912 | 263.14846 | 2.5       | 2 | 359.79   | C <sub>27</sub> H <sub>34</sub> F <sub>2</sub> N <sub>8</sub> O | (M+2H)+2 |
| 263.64952 | 263.64987 | -1.32     | 2 | 96.69    | C <sub>27</sub> H <sub>34</sub> F <sub>2</sub> N <sub>8</sub> O | (M+2H)+2 |
| 524.27521 | 524.28182 | -12.6     | 1 | 183.57   | C <sub>27</sub> H <sub>34</sub> F <sub>2</sub> N <sub>8</sub> O | M+       |
| 525.29001 | 525.28964 | 0.7       | 1 | 86308.49 | C <sub>27</sub> H <sub>34</sub> F <sub>2</sub> N <sub>8</sub> O | (M+H)+   |
| 526.29271 | 526.29247 | 0.47      | 1 | 27103.87 | C <sub>27</sub> H <sub>34</sub> F <sub>2</sub> N <sub>8</sub> O | (M+H)+   |
| 527.29545 | 527.29522 | 0.45      | 1 | 3988.21  | C <sub>27</sub> H <sub>34</sub> F <sub>2</sub> N <sub>8</sub> O | (M+H)+   |
| 528.29851 | 528.2979  | 1.16      | 1 | 428.02   | C <sub>27</sub> H <sub>34</sub> F <sub>2</sub> N <sub>8</sub> O | (M+H)+   |

# Compound 7

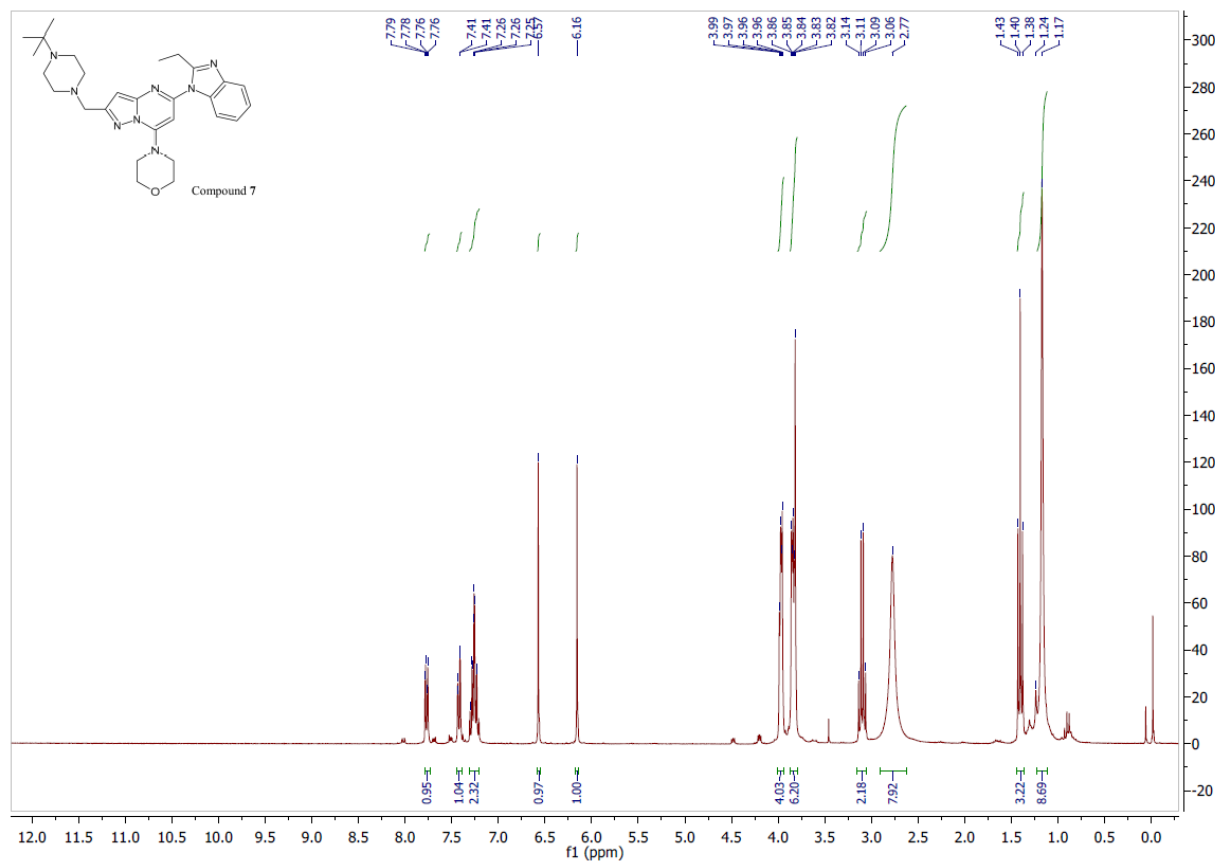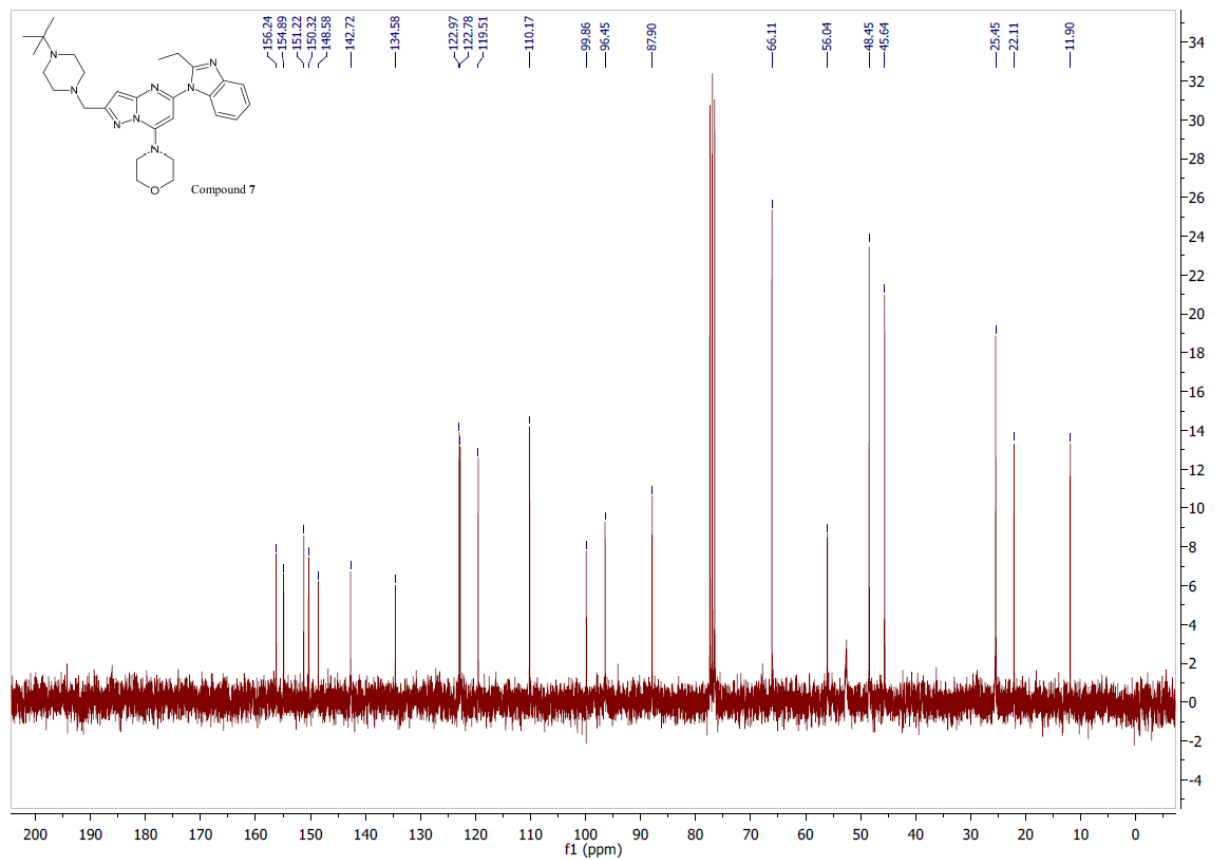

# Compound 7

## Compound Details

Cpd. 12: Compound 7

| Table 2. Compound 7 |              |             |             |                      |             |            |       |           |
|---------------------|--------------|-------------|-------------|----------------------|-------------|------------|-------|-----------|
| Name                | Formula      | RT          | RI          | Mass Diff (Tgt, ppm) | CAS         | ID Source  | Score | Algorithm |
| Compound 7          | C28 H38 N8 O | 1.100       |             | 502.3171             | 0.41        | FBF        | 99.96 | FBF       |
|                     |              |             |             |                      |             |            |       |           |
| Species             | m/z          | Score (Tgt) | Score (Lib) | Score (DB)           | Score (MFG) | Score (RT) |       |           |
| (M+2H)+2            | 252.1661     | 290.1263    | 99.96       |                      |             |            |       |           |
| (M+H)+              | 503.3243     |             |             |                      |             |            |       |           |

Compound Chromatograms (overlaid)

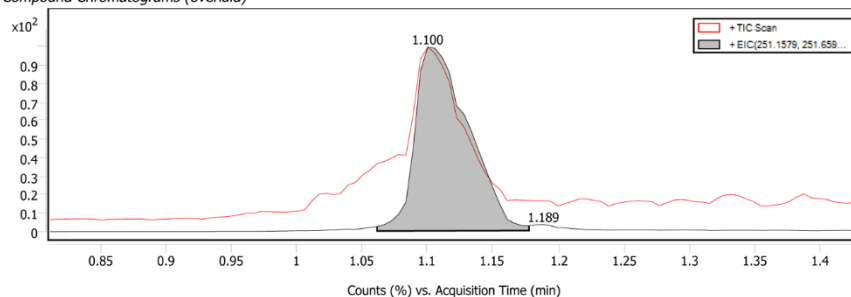

Structure

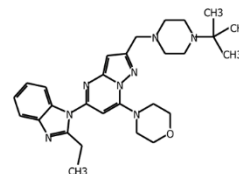

Compound Spectra (overlaid)

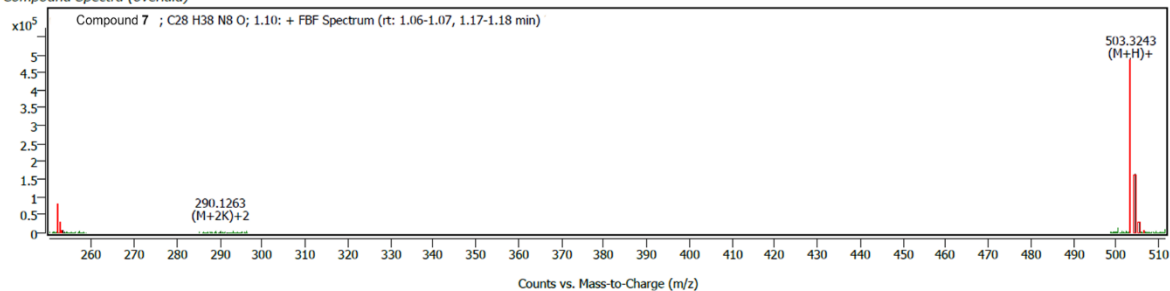

Compound ID Table

| Name       | Formula      | Species                        | RT    | RT Diff | Mass     | CAS | ID Source | Score | Score (Lib) | Score (Tgt) |
|------------|--------------|--------------------------------|-------|---------|----------|-----|-----------|-------|-------------|-------------|
| Compound 7 | C28 H38 N8 O | (M+2H)+2<br>(M+2K)+2<br>(M+H)+ | 1.100 |         | 502.3171 |     | FBF       | 99.96 |             | 99.96       |

# Compound 8

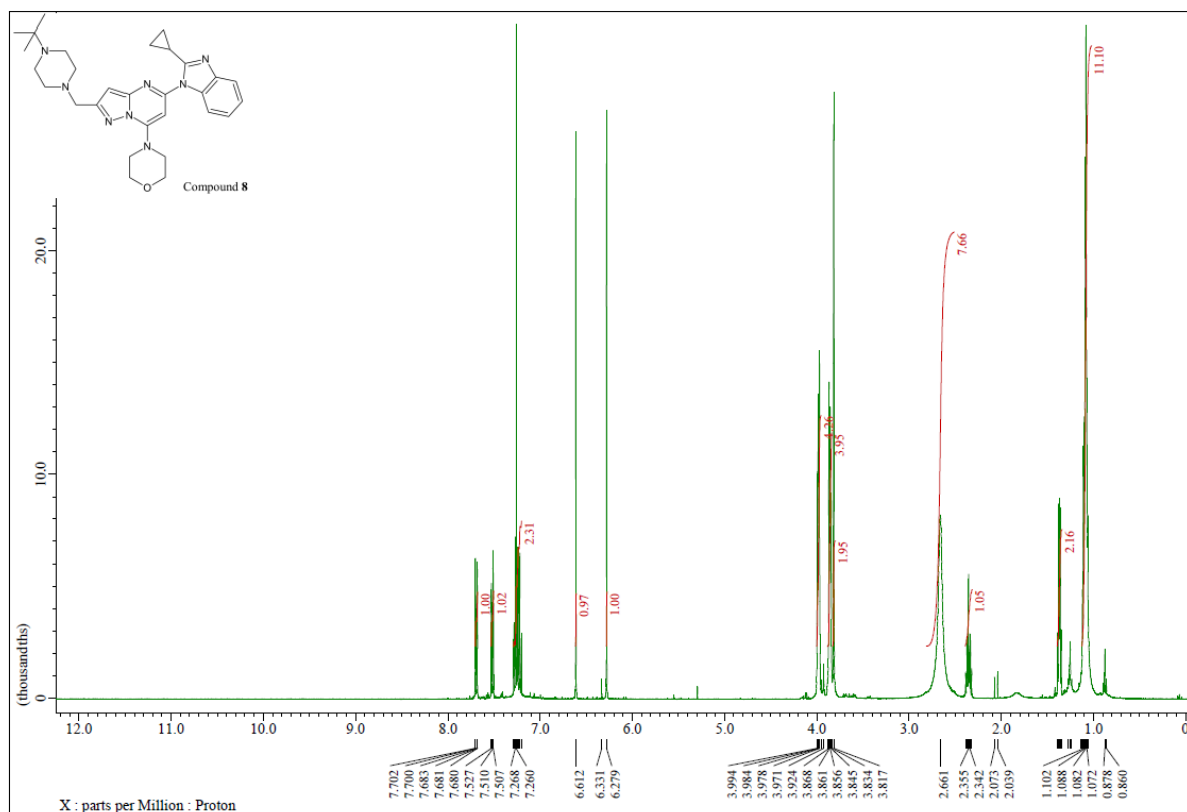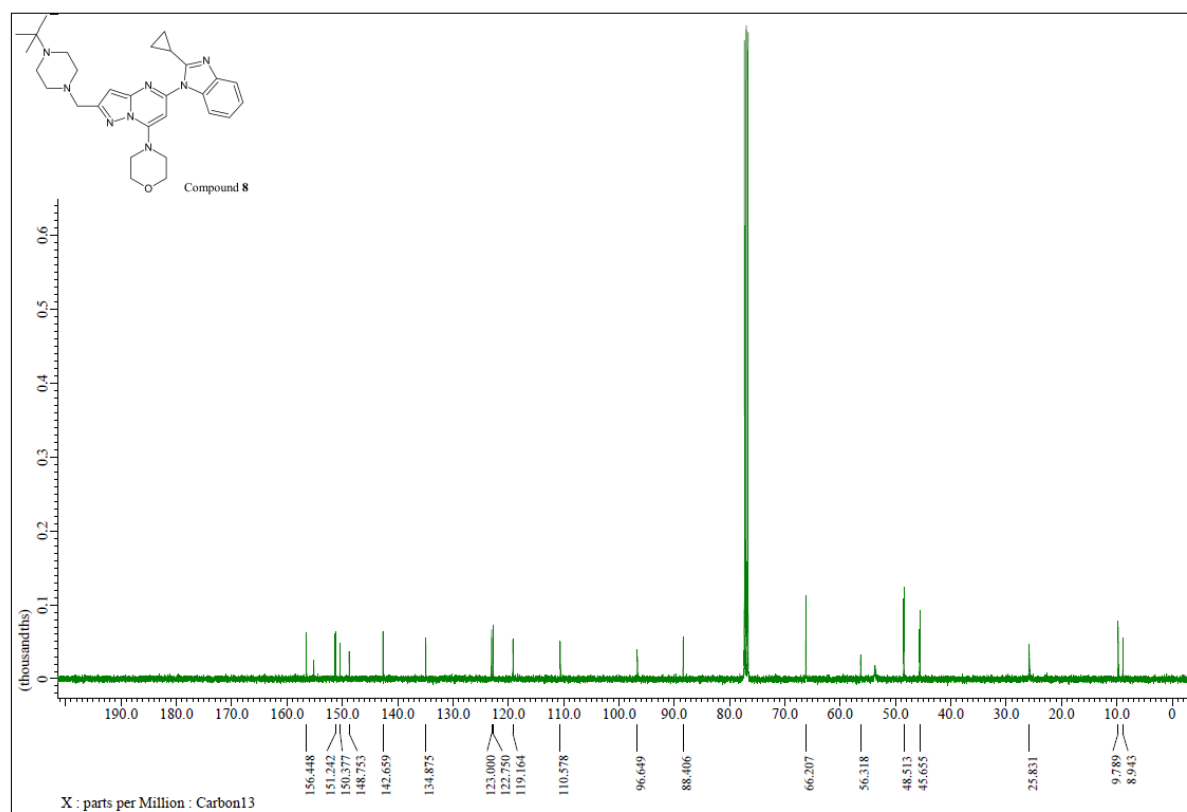

## Compound 8

### Compound Table

| Compound Label |
|----------------|
| Compound 8     |

| Compound Label | Algorithm           |
|----------------|---------------------|
| Compound 8     | Spectrum Extraction |

### MS Spectrum

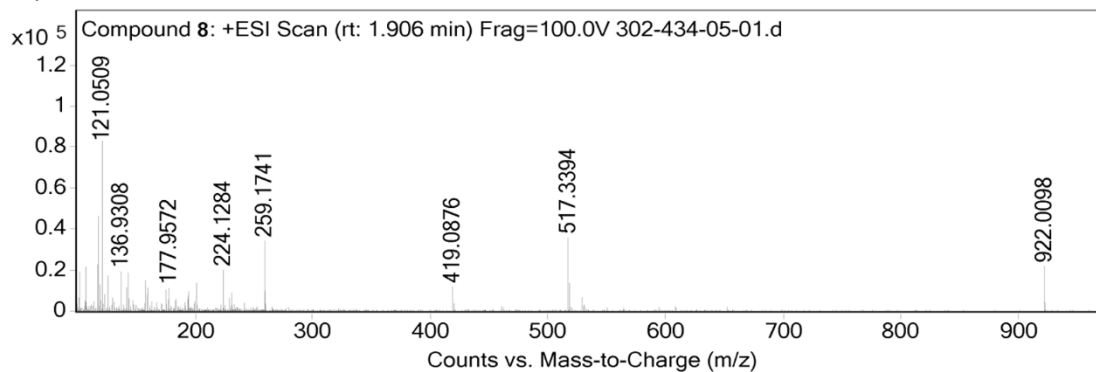

### MS Zoomed Spectrum

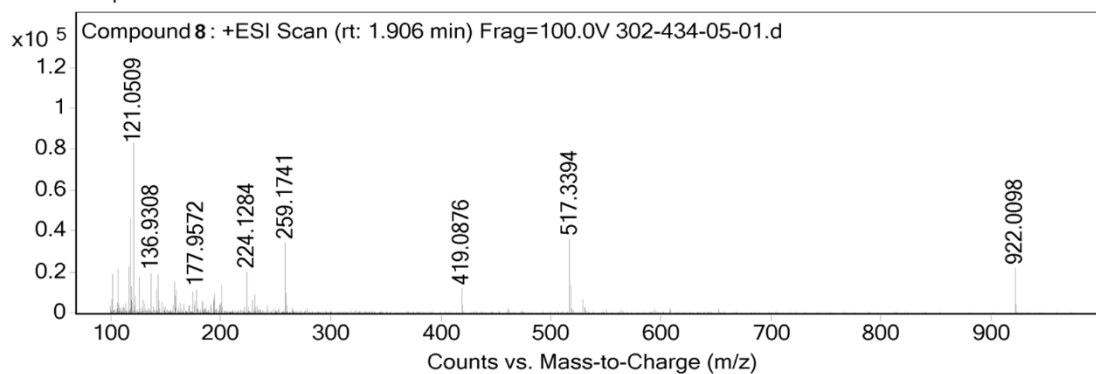

### MS Spectrum Peak List

| m/z      | z | Abund    |
|----------|---|----------|
| 102.1278 |   | 18882.98 |
| 107.0437 |   | 21485.96 |
| 117.0909 |   | 22488.31 |
| 118.0865 |   | 46076.47 |
| 121.0509 |   | 82922.48 |
| 136.9308 |   | 19114.65 |
| 224.1284 |   | 19938.67 |
| 259.1741 | 2 | 34202.22 |
| 517.3394 | 1 | 35841.52 |
| 922.0098 |   | 21757.48 |

--- End Of Report ---



# Compound 9

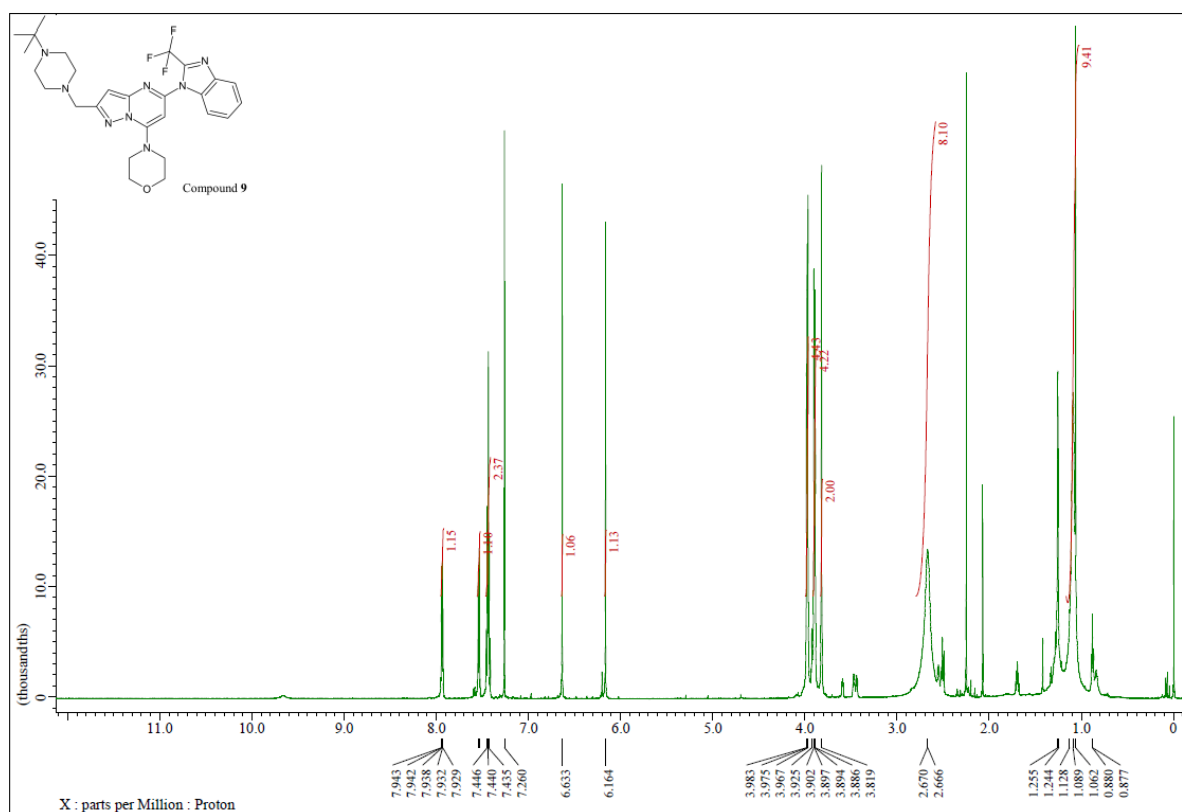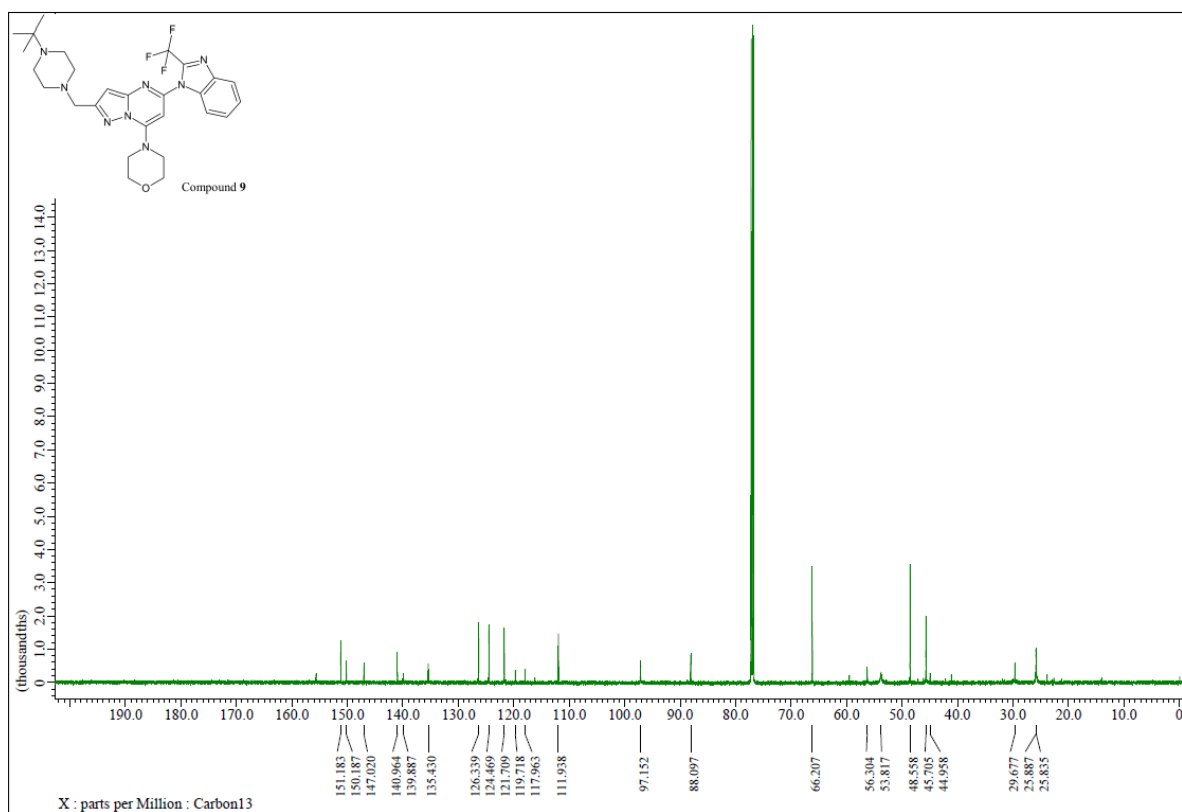

## Compound 9

| Name       | Obs. m/z  | Obs. RT | Obs. Mass | Tgt Formula     | Tgt Mass  | Tgt Mass Error | Find Cpds Algorit |
|------------|-----------|---------|-----------|-----------------|-----------|----------------|-------------------|
| Compound 9 | 272.14376 | 1.41    | 542.27339 | C27 H33 F3 N8 O | 542.27294 | 0.83           | Find by Formula   |

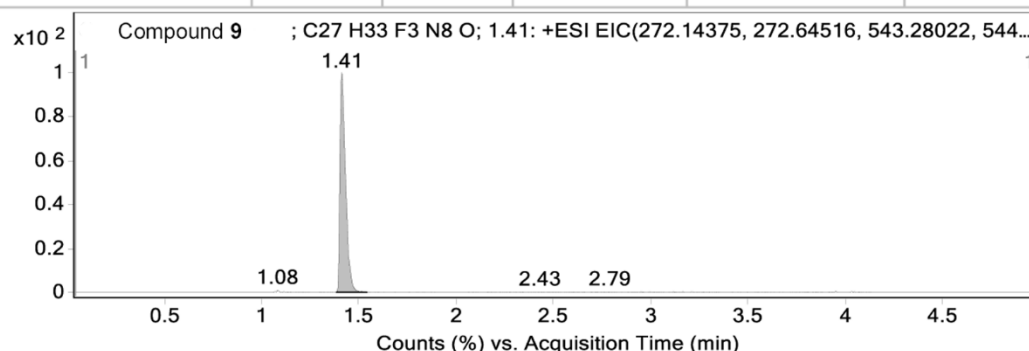

MS Zoomed Spectrum

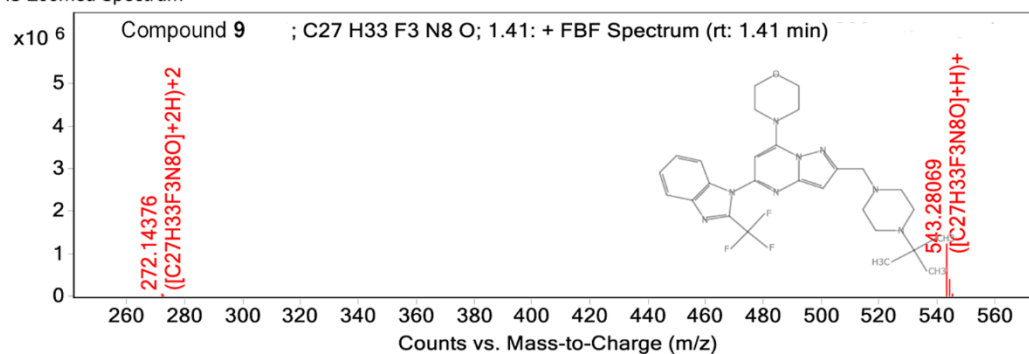

MS Zoomed Spectrum

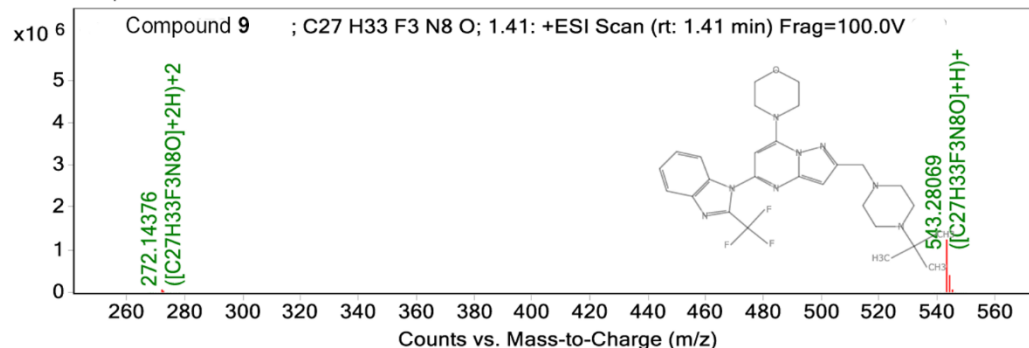

MS Spectrum Peak List

| Obs. m/z  | Charge | Abund      | Formula     | Ion/Isotope | Tgt Mass Error (ppm) |
|-----------|--------|------------|-------------|-------------|----------------------|
| 272.14376 | 2      | 65592.5    | C27H33F3N8O | (M+2H)+2    |                      |
| 272.6453  | 2      | 23443.74   | C27H33F3N8O | (M+2H)+2    |                      |
| 273.14618 | 2      | 4575.98    | C27H33F3N8O | (M+2H)+2    |                      |
| 273.64635 | 2      | 210.29     | C27H33F3N8O | (M+2H)+2    |                      |
| 543.28069 | 1      | 1223762.88 | C27H33F3N8O | (M+H)+      |                      |
| 544.28358 | 1      | 331950.72  | C27H33F3N8O | (M+H)+      |                      |
| 545.28592 | 1      | 53670.24   | C27H33F3N8O | (M+H)+      |                      |
| 272.14376 | 2      | 65592.5    | C27H33F3N8O | (M+2H)+2    | 0.03                 |
| 272.6453  | 2      | 23443.74   | C27H33F3N8O | (M+2H)+2    | 0.53                 |
| 273.14618 | 2      | 4575.98    | C27H33F3N8O | (M+2H)+2    | -1.32                |
| 273.64635 | 2      | 210.29     | C27H33F3N8O | (M+2H)+2    | -5.59                |
| 543.28069 | 1      | 1223762.88 | C27H33F3N8O | (M+H)+      | 0.87                 |
| 544.28358 | 1      | 331950.72  | C27H33F3N8O | (M+H)+      | 0.99                 |
| 545.28592 | 1      | 53670.24   | C27H33F3N8O | (M+H)+      | 0.23                 |

--- End Of Report ---

# Compound 11

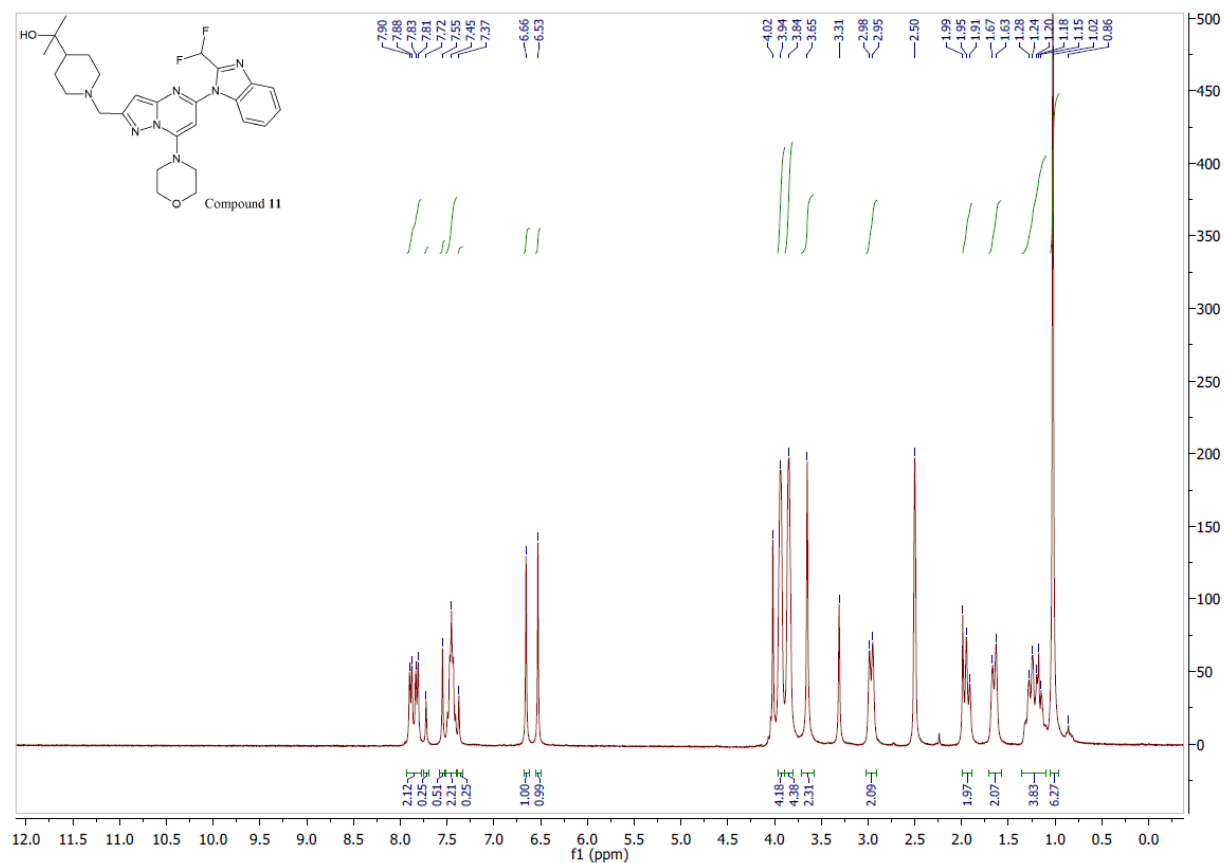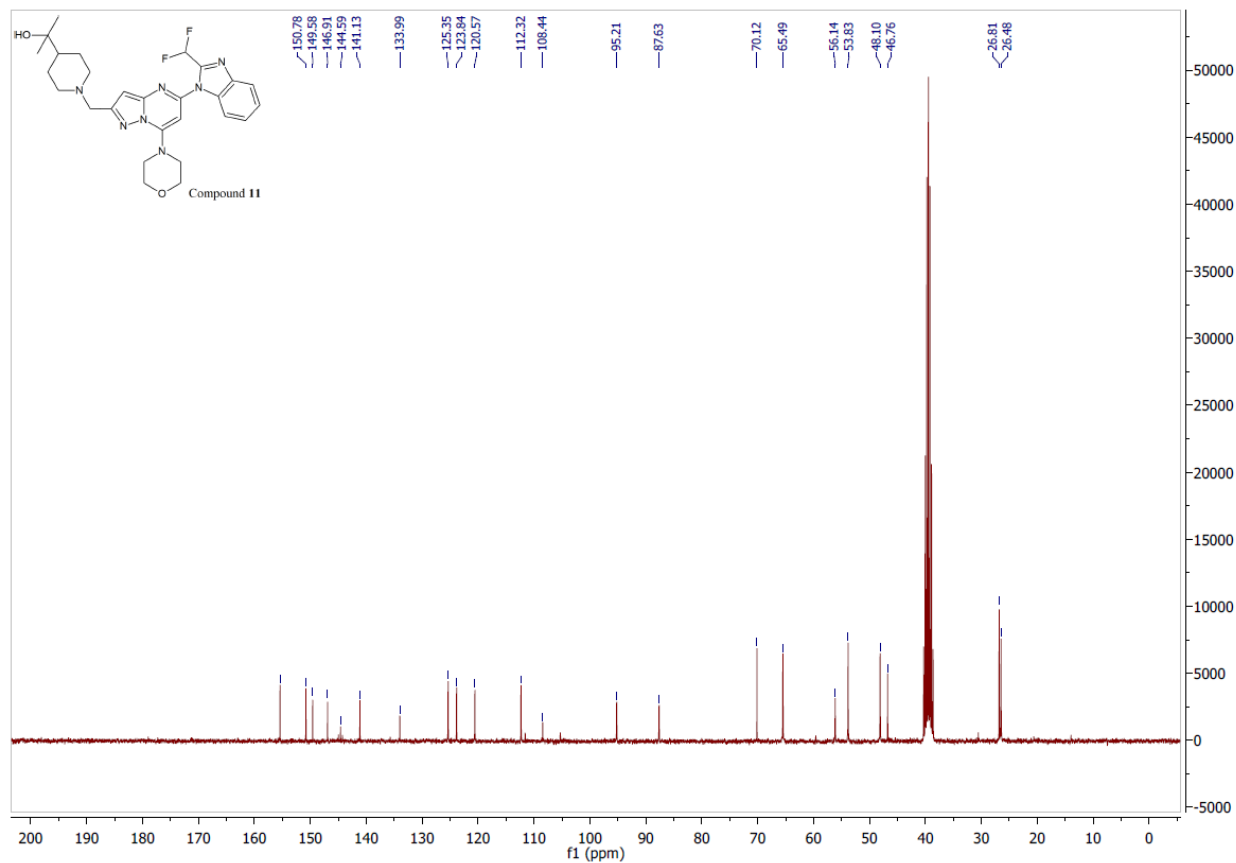

## Compound 11

| Name        | Obs. m/z | Obs. RT | Obs. Mass | Tgt Formula      | Tgt Mass | Tgt Mass Error | Find Cpd<br>Algorit |
|-------------|----------|---------|-----------|------------------|----------|----------------|---------------------|
| Compound 11 | 526.2764 | 1.16    | 525.2691  | C27 H33 F2 N7 O2 | 525.2664 | 5.12           | Find by<br>Formula  |

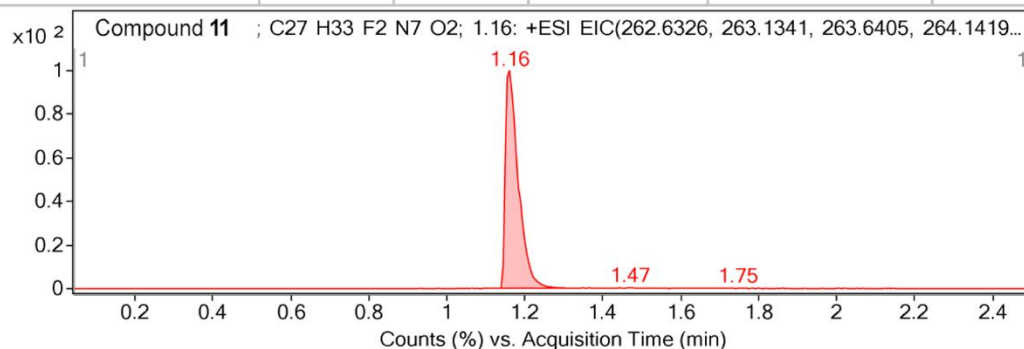

MS Zoomed Spectrum

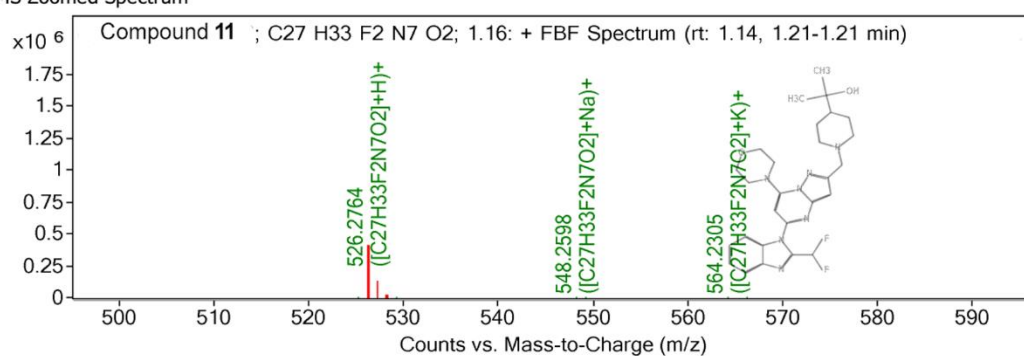

MS Zoomed Spectrum

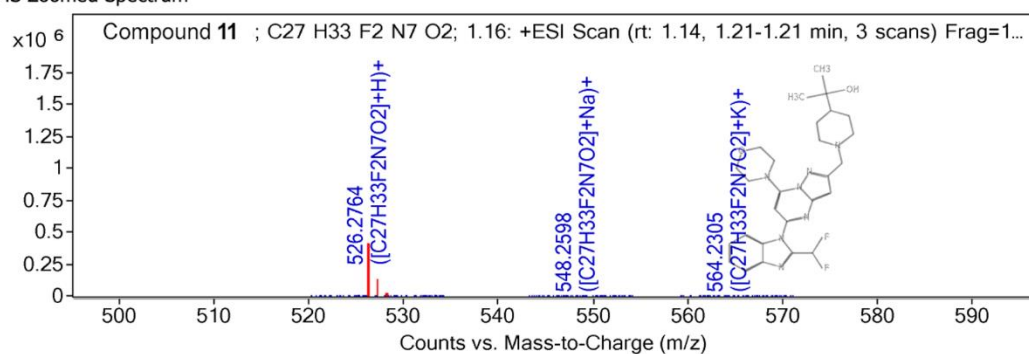

MS Spectrum Peak List

| Obs. m/z | Charge | Abund     | Formula      | Ion/Isotope | Tgt Mass Error (ppm) |
|----------|--------|-----------|--------------|-------------|----------------------|
| 526.2764 | 1      | 404616.13 | C27H33F2N7O2 | (M+H)+      |                      |
| 526.2764 | 1      | 404616.13 | C27H33F2N7O2 | (M+H)+      | 5.14                 |

--- End Of Report ---

# Compound 12

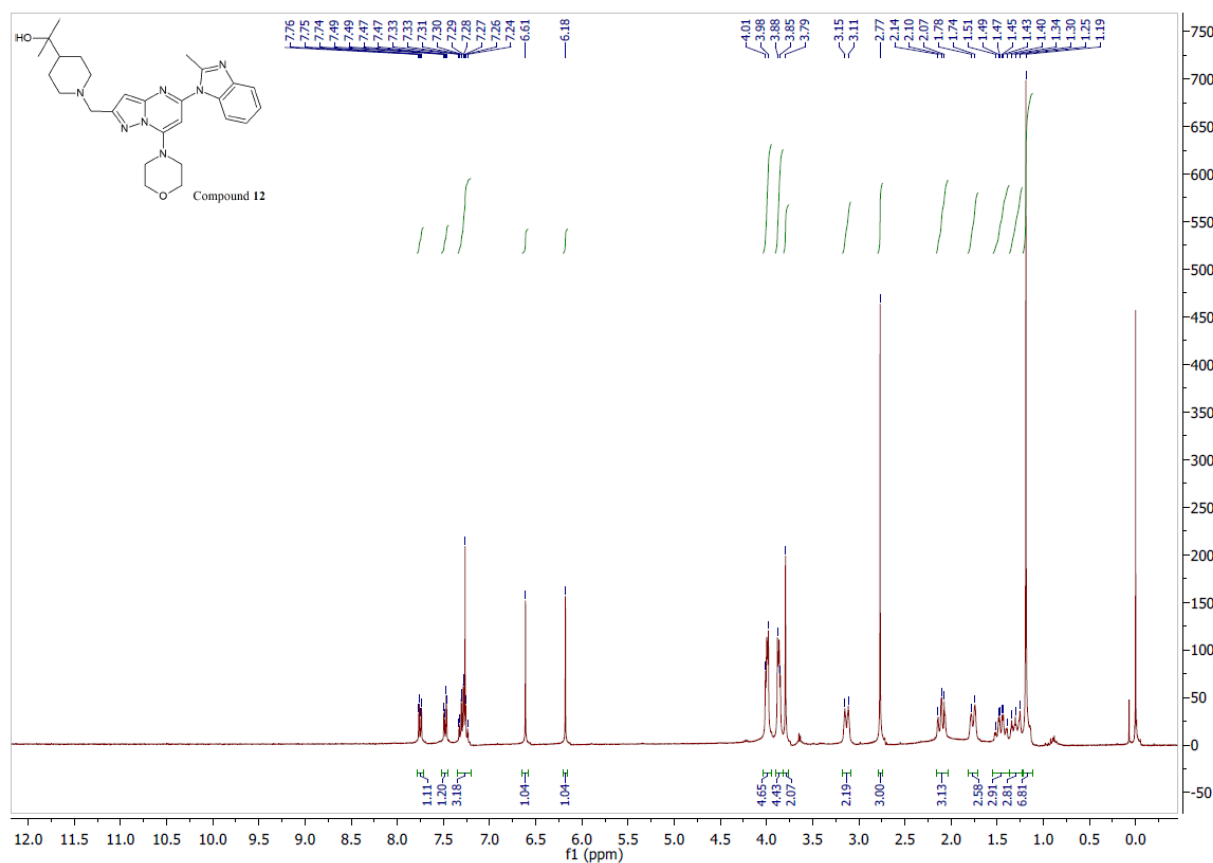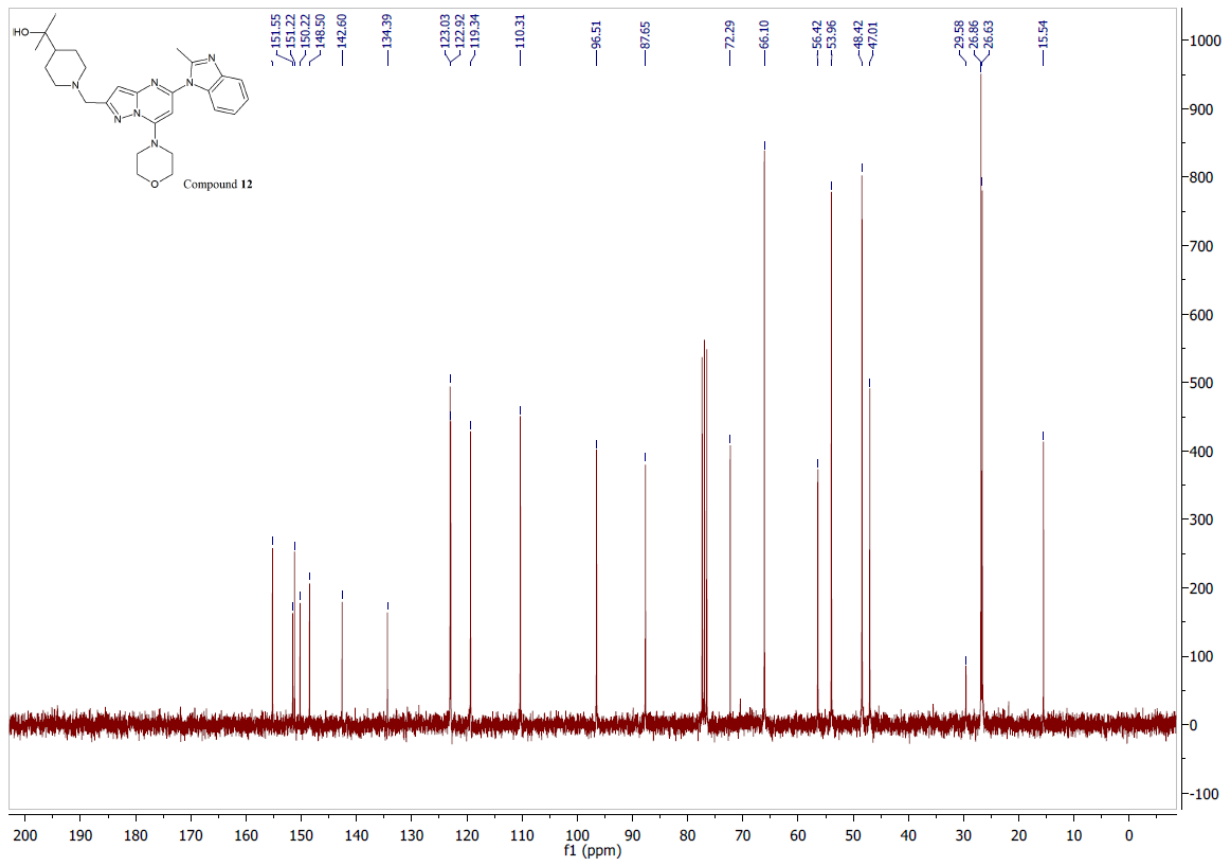

## Compound 12

| Compound Label | Name        | m/z       | RT   | Algorithm       | Mass      |
|----------------|-------------|-----------|------|-----------------|-----------|
| Compound 12    | Compound 12 | 245.65023 | 1.09 | Find by Formula | 489.28538 |

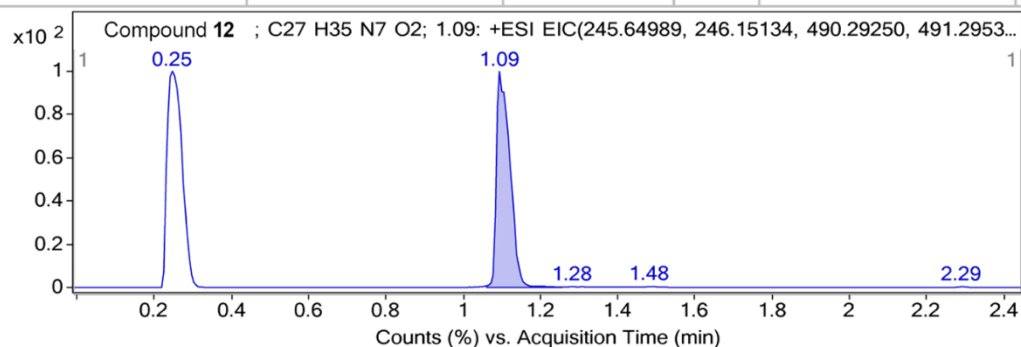

MS Zoomed Spectrum

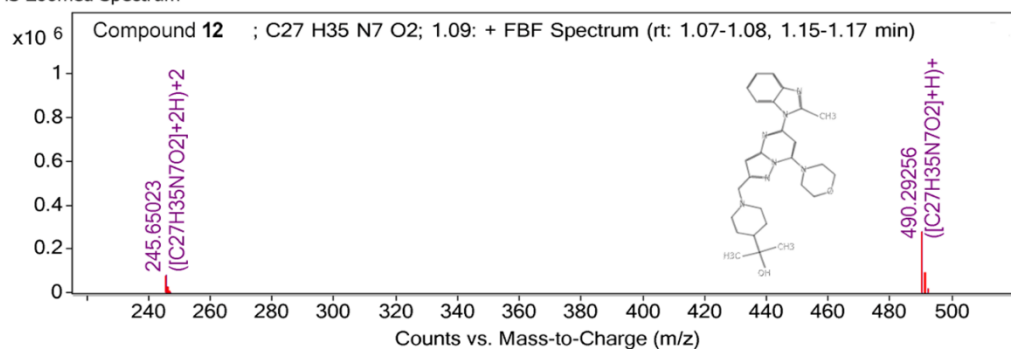

MS Zoomed Spectrum

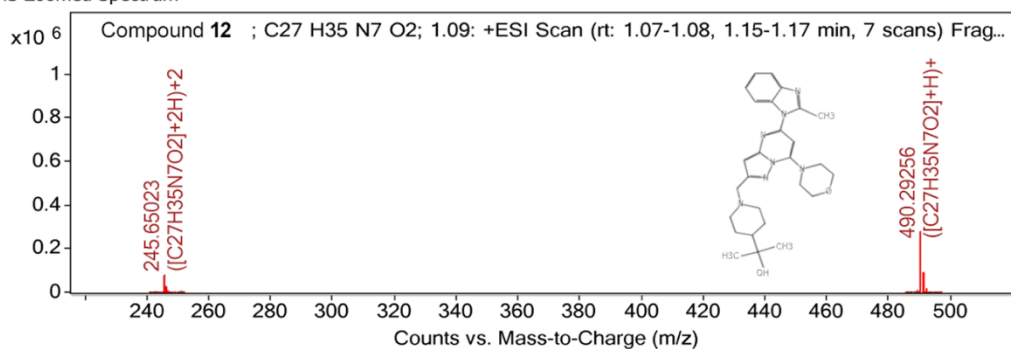

MS Spectrum Peak List

| m/z       | Calc m/z  | Diff(ppm) | z | Abund     | Formula    | Ion      |
|-----------|-----------|-----------|---|-----------|------------|----------|
| 245.65023 | 245.64989 | 1.38      | 2 | 79116.77  | C27H35N7O2 | (M+2H)+2 |
| 246.15176 | 246.15134 | 1.74      | 2 | 26046.49  | C27H35N7O2 | (M+2H)+2 |
| 246.65239 | 246.65272 | -1.31     | 2 | 4306.85   | C27H35N7O2 | (M+2H)+2 |
| 247.15487 | 247.15405 | 3.34      | 2 | 683.01    | C27H35N7O2 | (M+2H)+2 |
| 490.29256 | 490.2925  | 0.12      | 1 | 277845.75 | C27H35N7O2 | (M+H)+   |
| 491.29534 | 491.29539 | -0.1      | 1 | 84677.91  | C27H35N7O2 | (M+H)+   |
| 492.29744 | 492.29815 | -1.45     | 1 | 16256.98  | C27H35N7O2 | (M+H)+   |

--- End Of Report ---

# Compound 16

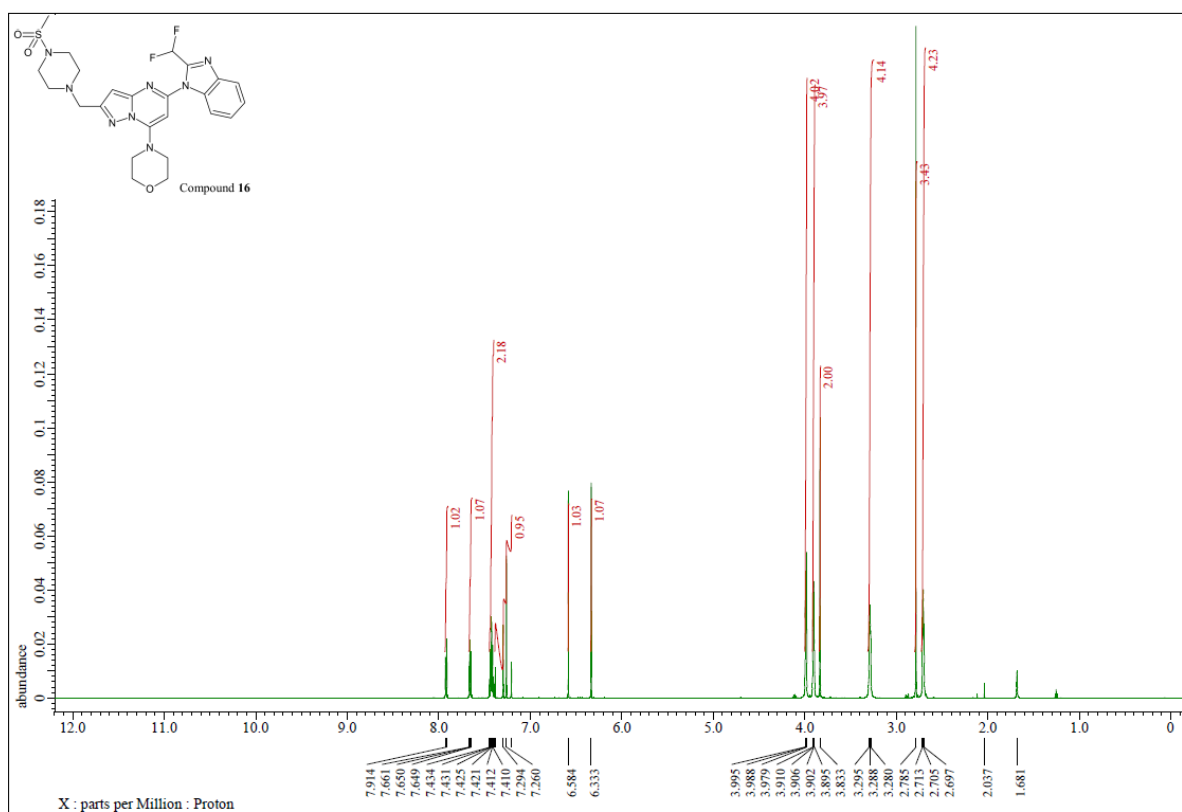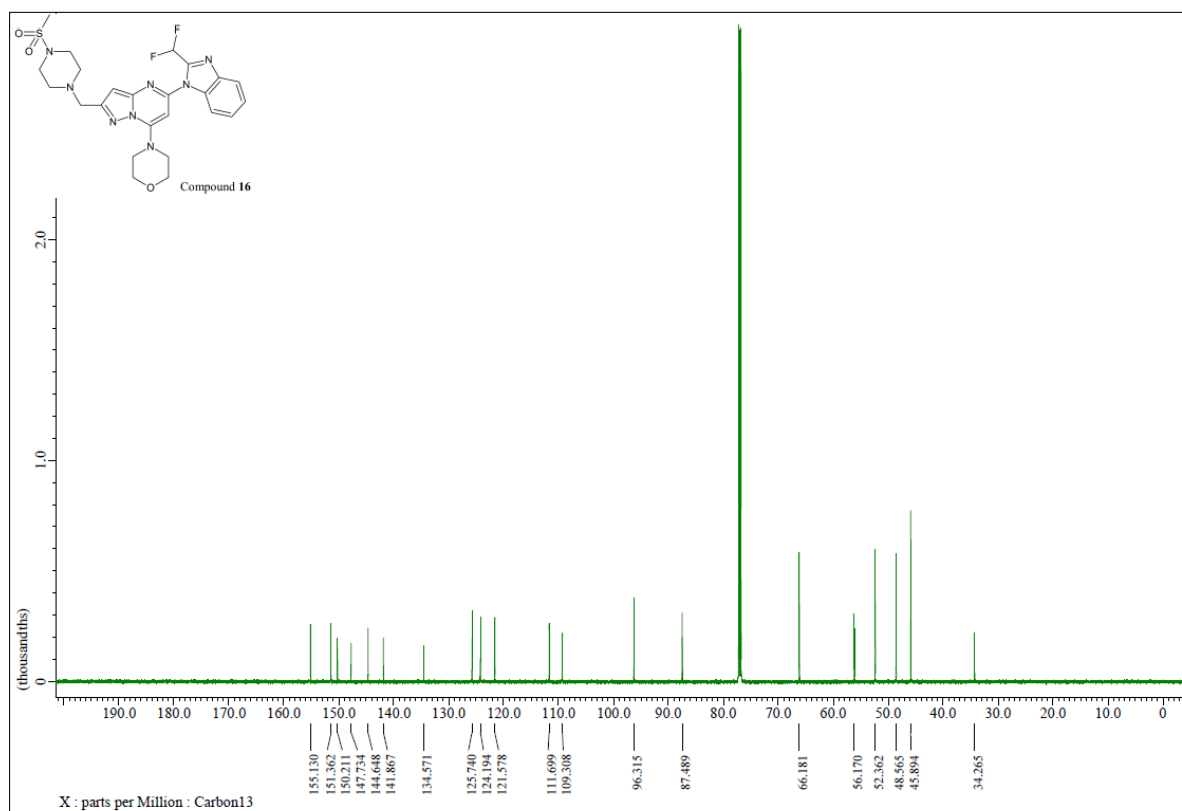

## Compound 16

| Compound Label | Name        | m/z       | RT   | Algorithm       | Mass      |
|----------------|-------------|-----------|------|-----------------|-----------|
| Compound 16    | Compound 16 | 547.20487 | 1.19 | Find by Formula | 546.19768 |

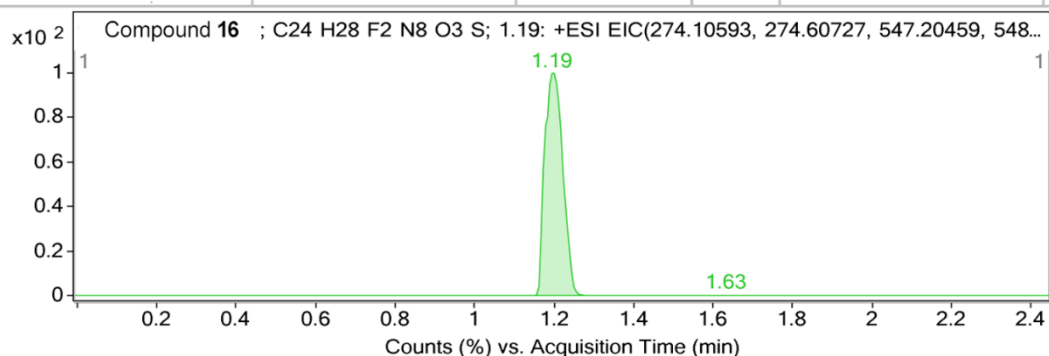

MS Zoomed Spectrum

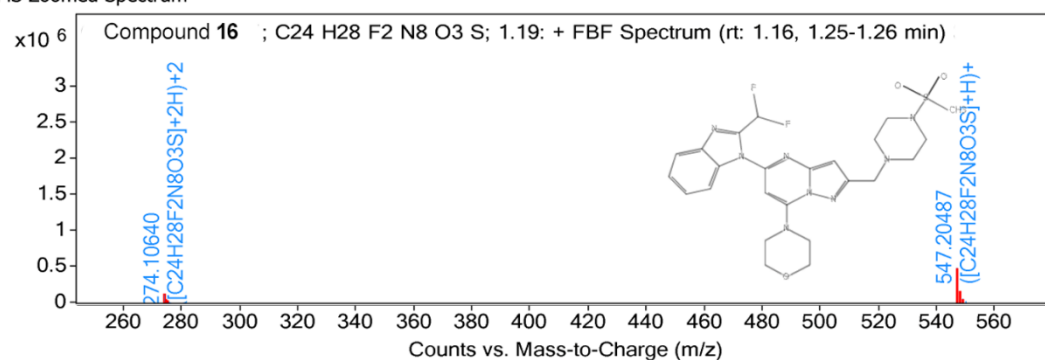

MS Zoomed Spectrum

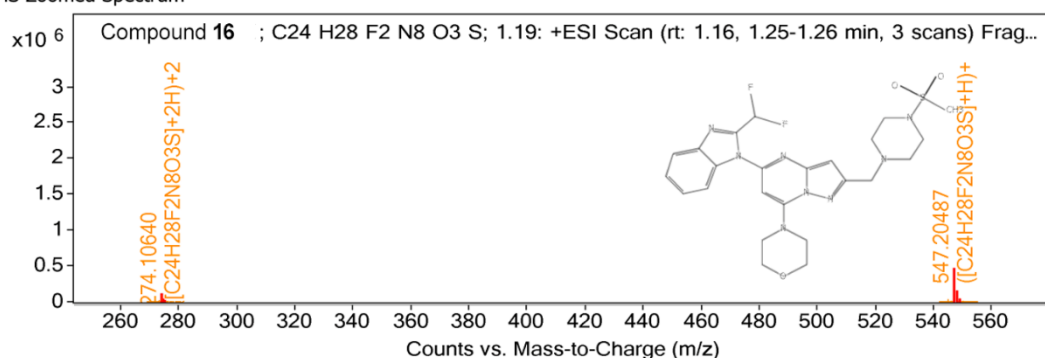

MS Spectrum Peak List

| m/z       | Calc m/z  | Diff(ppm) | z | Abund     | Formula                                                                        | Ion      |
|-----------|-----------|-----------|---|-----------|--------------------------------------------------------------------------------|----------|
| 274.1064  | 274.10593 | 1.68      | 2 | 105049.91 | C <sub>24</sub> H <sub>28</sub> F <sub>2</sub> N <sub>8</sub> O <sub>3</sub> S | (M+2H)+2 |
| 274.60756 | 274.60727 | 1.04      | 2 | 33865.99  | C <sub>24</sub> H <sub>28</sub> F <sub>2</sub> N <sub>8</sub> O <sub>3</sub> S | (M+2H)+2 |
| 275.1073  | 275.10631 | 3.58      | 2 | 10859.48  | C <sub>24</sub> H <sub>28</sub> F <sub>2</sub> N <sub>8</sub> O <sub>3</sub> S | (M+2H)+2 |
| 275.60631 | 275.60663 | -1.16     | 2 | 2302.53   | C <sub>24</sub> H <sub>28</sub> F <sub>2</sub> N <sub>8</sub> O <sub>3</sub> S | (M+2H)+2 |
| 547.20487 | 547.20459 | 0.52      | 1 | 465451.59 | C <sub>24</sub> H <sub>28</sub> F <sub>2</sub> N <sub>8</sub> O <sub>3</sub> S | (M+H)+   |
| 548.2075  | 548.20726 | 0.44      | 1 | 130005.94 | C <sub>24</sub> H <sub>28</sub> F <sub>2</sub> N <sub>8</sub> O <sub>3</sub> S | (M+H)+   |
| 549.20534 | 549.20534 | -0.01     | 1 | 38941.63  | C <sub>24</sub> H <sub>28</sub> F <sub>2</sub> N <sub>8</sub> O <sub>3</sub> S | (M+H)+   |
| 550.20543 | 550.20598 | -1        | 1 | 8620.2    | C <sub>24</sub> H <sub>28</sub> F <sub>2</sub> N <sub>8</sub> O <sub>3</sub> S | (M+H)+   |

--- End Of Report ---



# Compound 17

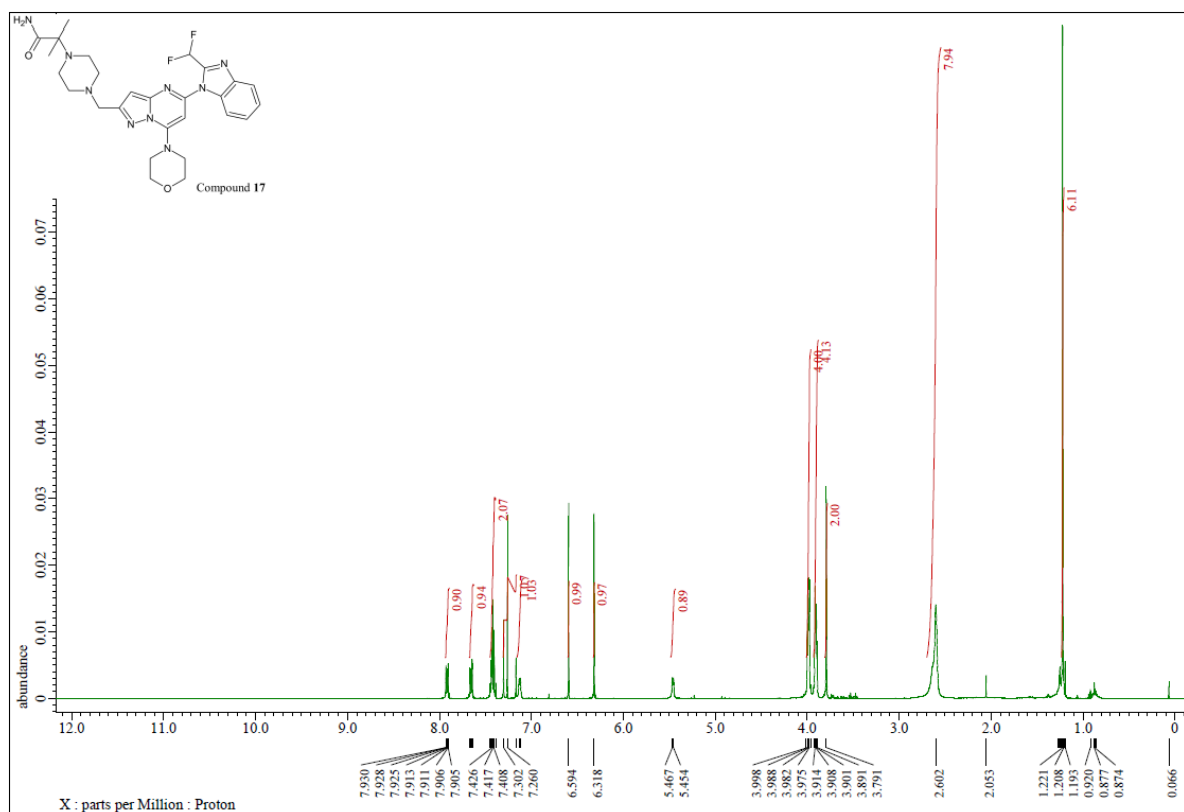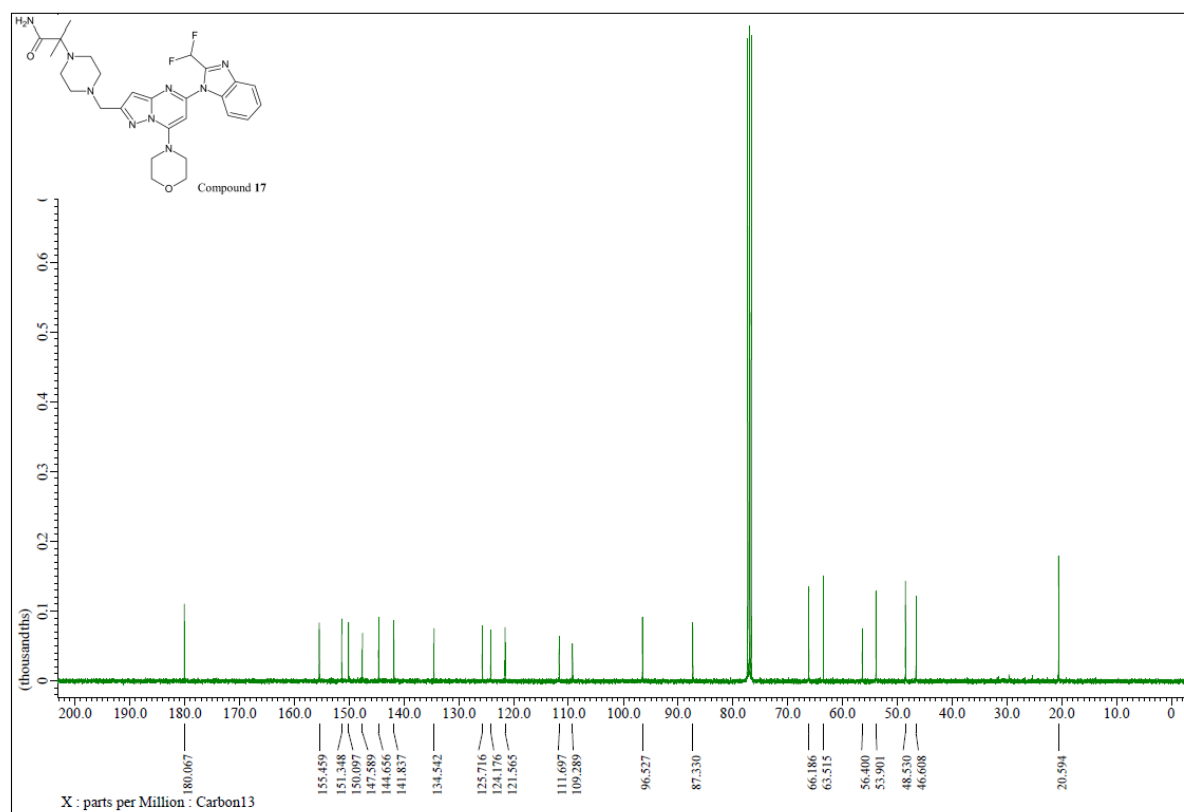

# Compound 17

| Name        | Obs. m/z | Obs. RT | Obs. Mass | Tgt Formula      | Tgt Mass  | Tgt Mass Error | Find Cpds Algorit |
|-------------|----------|---------|-----------|------------------|-----------|----------------|-------------------|
| Compound 17 | 554.28   | 1.24    | 553.27265 | C27 H33 F2 N9 O2 | 553.27253 | 0.23           | Find by Formula   |

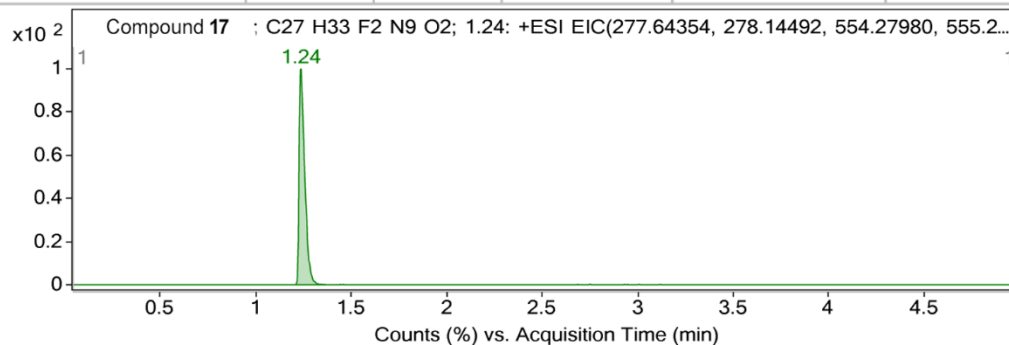

MS Zoomed Spectrum

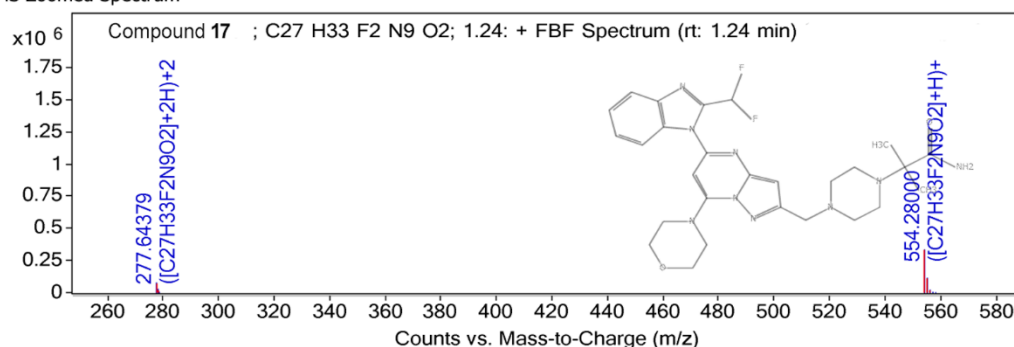

MS Zoomed Spectrum

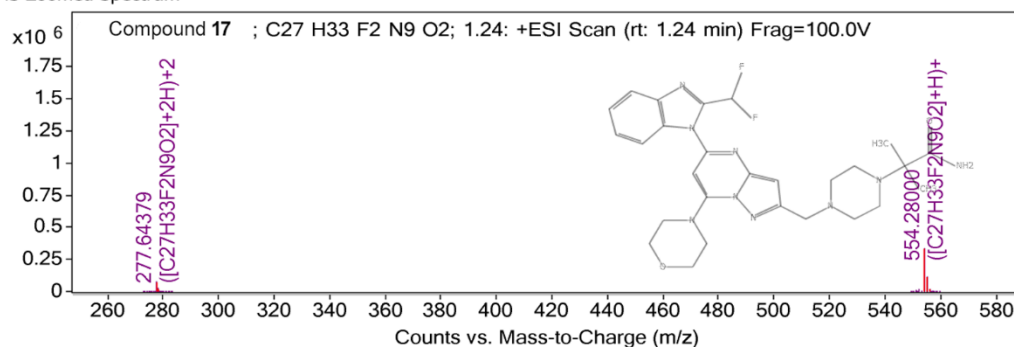

MS Spectrum Peak List

| Obs. m/z  | Charge | Abund     | Formula      | Ion/Isotope | Tgt Mass Error (ppm) |
|-----------|--------|-----------|--------------|-------------|----------------------|
| 277.64379 | 2      | 74236.3   | C27H33F2N9O2 | (M+2H)+2    |                      |
| 278.14494 | 2      | 24665.33  | C27H33F2N9O2 | (M+2H)+2    |                      |
| 278.64678 | 2      | 3142.95   | C27H33F2N9O2 | (M+2H)+2    |                      |
| 554.28    | 1      | 331615.38 | C27H33F2N9O2 | (M+H)+      |                      |
| 555.28243 | 1      | 113299.23 | C27H33F2N9O2 | (M+H)+      |                      |
| 556.28444 | 1      | 17136.88  | C27H33F2N9O2 | (M+H)+      |                      |
| 557.28512 | 1      | 1819.13   | C27H33F2N9O2 | (M+H)+      |                      |
| 558.2883  | 1      | 234.87    | C27H33F2N9O2 | (M+H)+      |                      |
| 277.64379 | 2      | 74236.3   | C27H33F2N9O2 | (M+2H)+2    | 0.91                 |
| 278.14494 | 2      | 24665.33  | C27H33F2N9O2 | (M+2H)+2    | 0.07                 |
| 278.64678 | 2      | 3142.95   | C27H33F2N9O2 | (M+2H)+2    | 1.91                 |
| 554.28    | 1      | 331615.38 | C27H33F2N9O2 | (M+H)+      | 0.35                 |
| 555.28243 | 1      | 113299.23 | C27H33F2N9O2 | (M+H)+      | -0.25                |
| 556.28444 | 1      | 17136.88  | C27H33F2N9O2 | (M+H)+      | -1.38                |
| 557.28512 | 1      | 1819.13   | C27H33F2N9O2 | (M+H)+      | -4.77                |
| 558.2883  | 1      | 234.87    | C27H33F2N9O2 | (M+H)+      | -3.57                |

--- End Of Report ---

# Compound 18

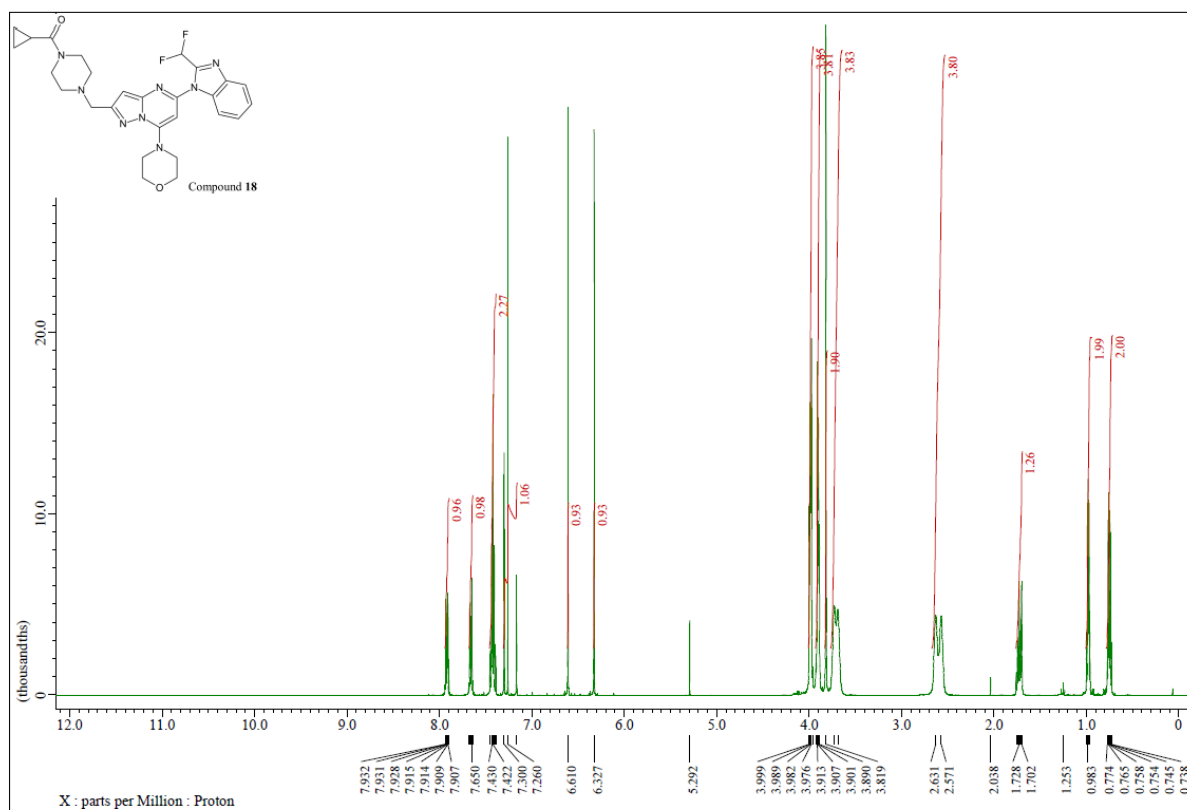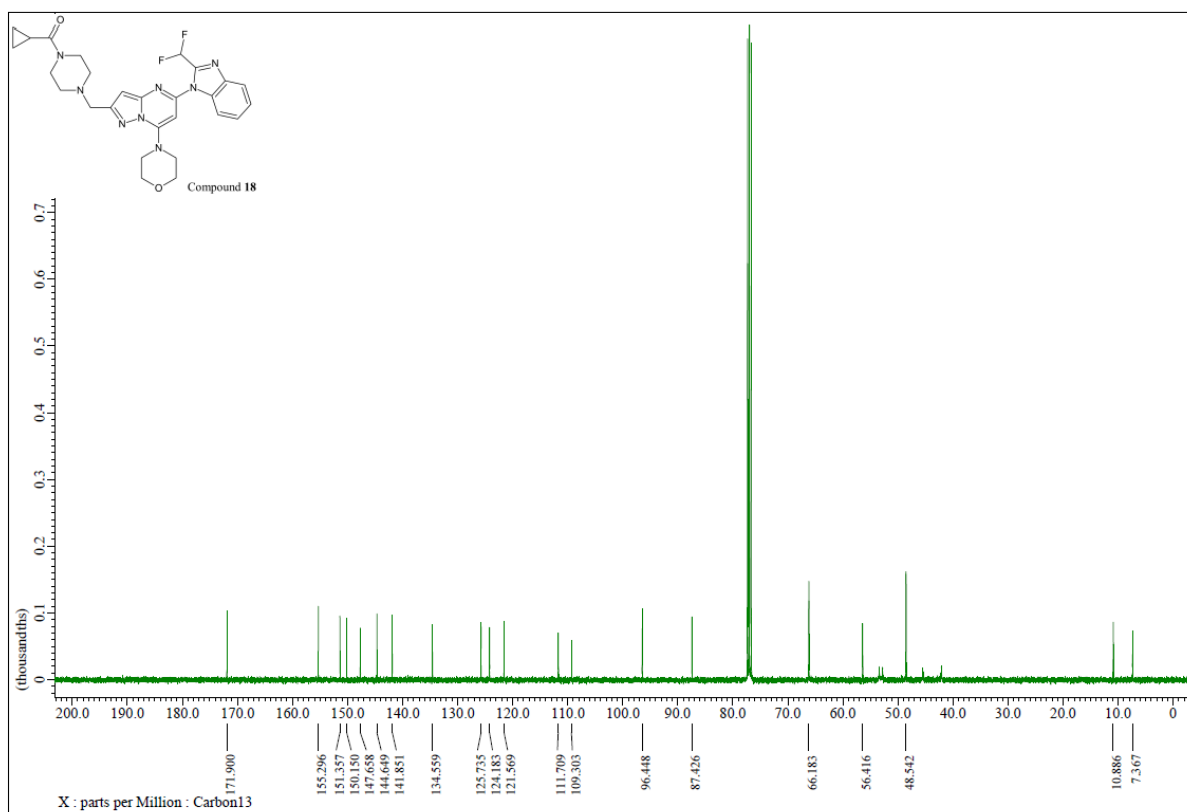

# Compound 18

| Name        | Obs. m/z  | Obs. RT | Obs. Mass | Tgt Formula      | Tgt Mass  | Tgt Mass Error | Find Cpds Algorit |
|-------------|-----------|---------|-----------|------------------|-----------|----------------|-------------------|
| Compound 18 | 269.13057 | 1.31    | 536.24666 | C27 H30 F2 N8 O2 | 536.24598 | 1.28           | Find by Formula   |

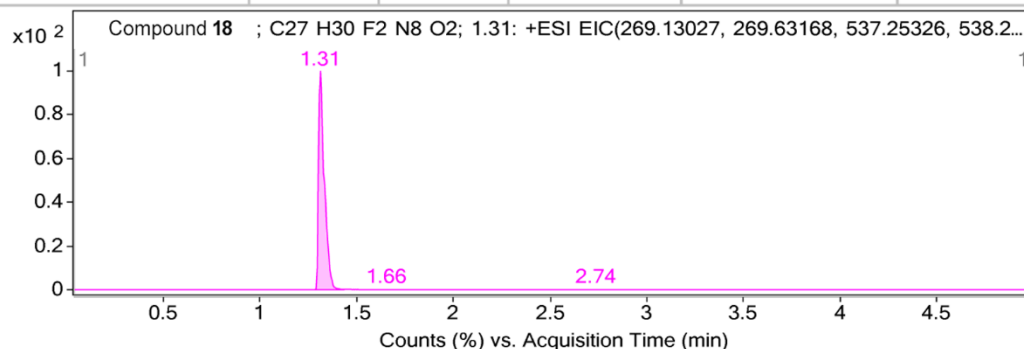

MS Zoomed Spectrum

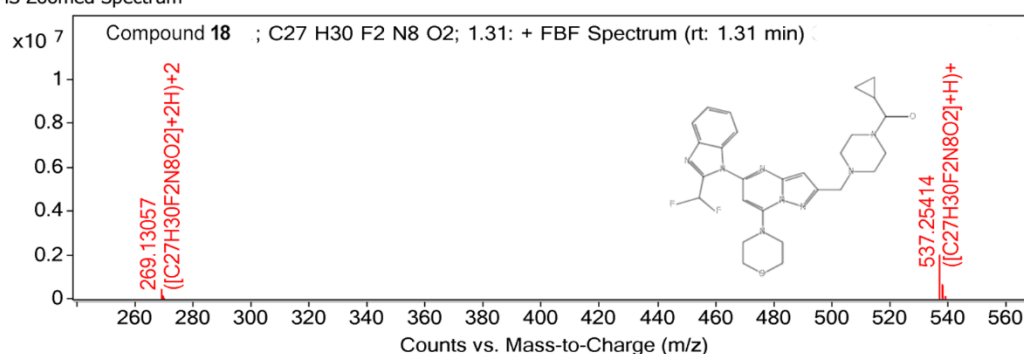

MS Zoomed Spectrum

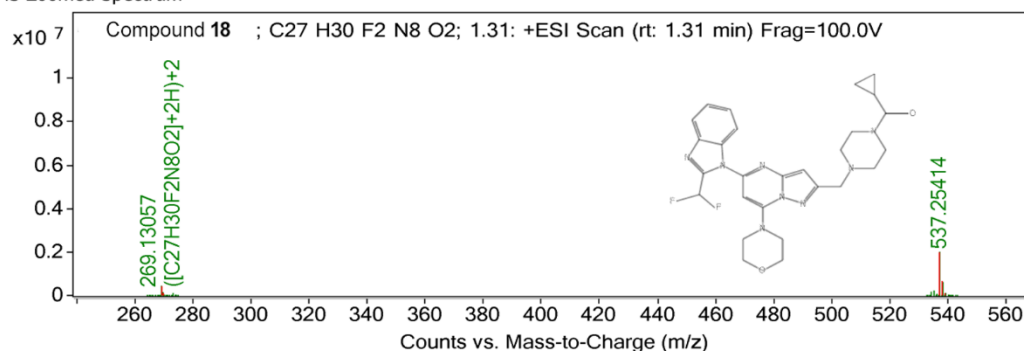

MS Spectrum Peak List

| Obs. m/z  | Charge | Abund      | Formula      | Ion/Isotope | Tgt Mass Error (ppm) |
|-----------|--------|------------|--------------|-------------|----------------------|
| 269.13057 | 2      | 425649.31  | C27H30F2N8O2 | (M+2H)+2    |                      |
| 269.63216 | 2      | 122896.92  | C27H30F2N8O2 | (M+2H)+2    |                      |
| 270.13329 | 2      | 19970.75   | C27H30F2N8O2 | (M+2H)+2    |                      |
| 537.25414 | 1      | 1985956.63 | C27H30F2N8O2 | (M+H)+      |                      |
| 538.25617 | 1      | 592174.13  | C27H30F2N8O2 | (M+H)+      |                      |
| 539.25893 | 1      | 86057.74   | C27H30F2N8O2 | (M+H)+      |                      |
| 269.13057 | 2      | 425649.31  | C27H30F2N8O2 | (M+2H)+2    | 1.14                 |
| 269.63216 | 2      | 122896.92  | C27H30F2N8O2 | (M+2H)+2    | 1.78                 |
| 270.13329 | 2      | 19970.75   | C27H30F2N8O2 | (M+2H)+2    | 0.96                 |
| 537.25414 | 1      | 1985956.63 | C27H30F2N8O2 | (M+H)+      | 1.64                 |
| 537.25414 |        | 1988175.75 |              |             |                      |
| 538.25617 | 1      | 592174.13  | C27H30F2N8O2 | (M+H)+      | 0.17                 |
| 539.25893 | 1      | 86057.74   | C27H30F2N8O2 | (M+H)+      | 0.29                 |

--- End Of Report ---

# Compound 19

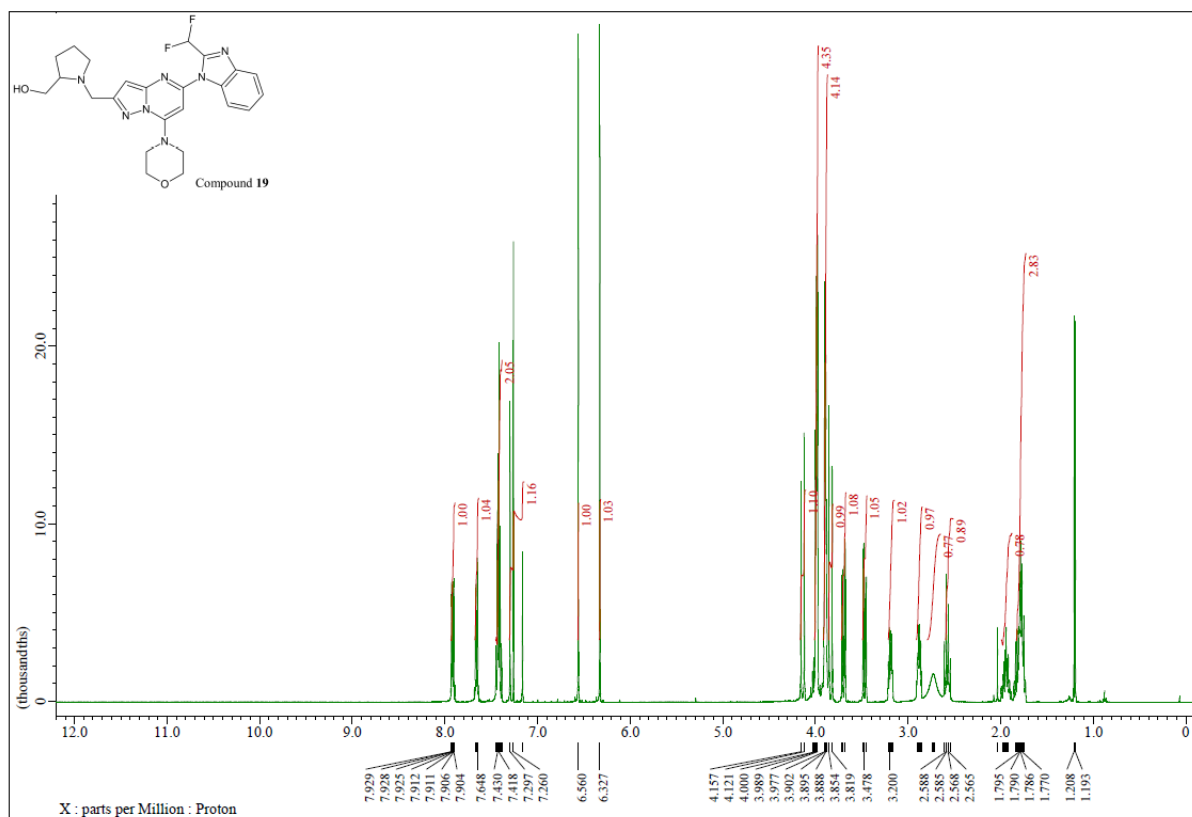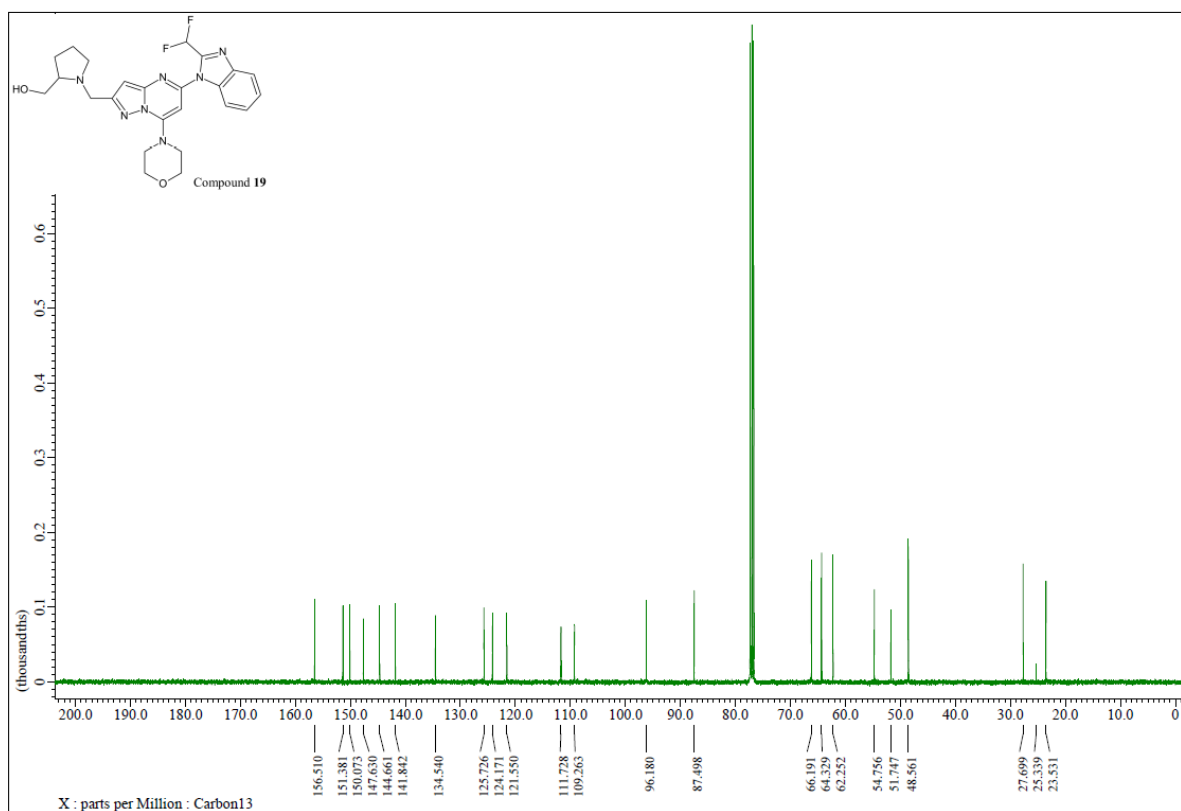

## Compound 19

| Name        | Obs. m/z  | Obs. RT | Obs. Mass | Tgt Formula      | Tgt Mass  | Tgt Mass Error | Find Cpds Algorit |
|-------------|-----------|---------|-----------|------------------|-----------|----------------|-------------------|
| Compound 19 | 484.22718 | 1.23    | 483.21997 | C24 H27 F2 N7 O2 | 483.21943 | 1.11           | Find by Formula   |

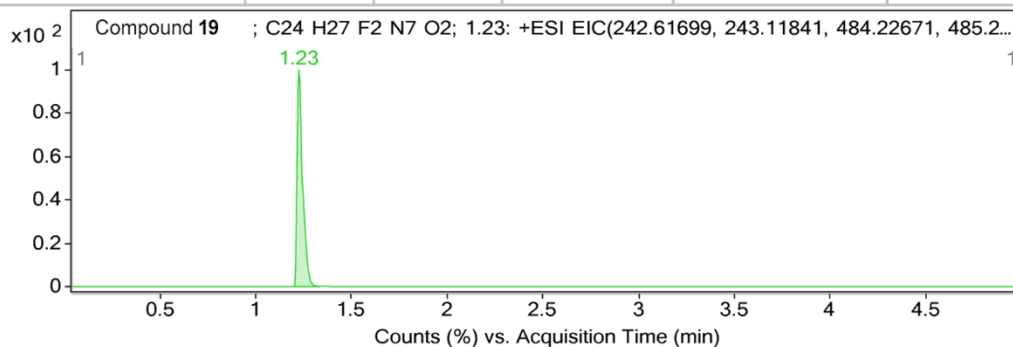

MS Zoomed Spectrum

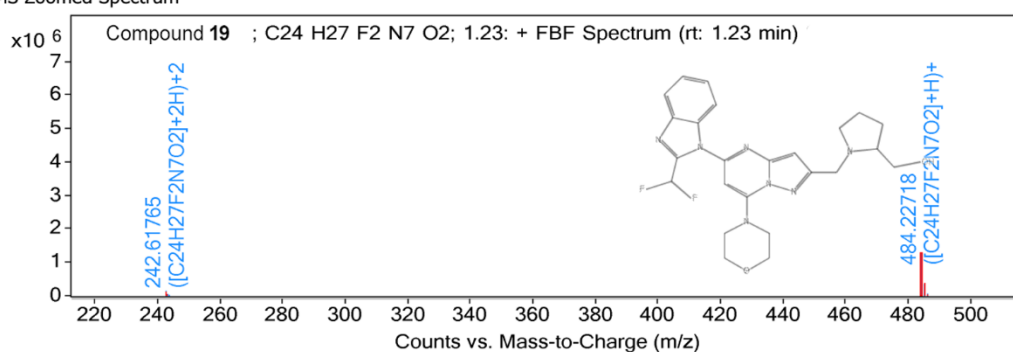

MS Zoomed Spectrum

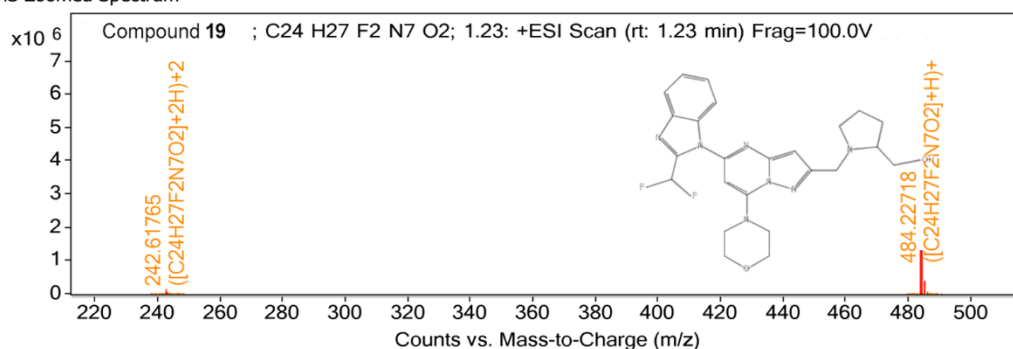

MS Spectrum Peak List

| Obs. m/z  | Charge | Abund     | Formula      | Ion/Isotope | Tgt Mass Error (ppm) |
|-----------|--------|-----------|--------------|-------------|----------------------|
| 242.61765 | 2      | 128896.13 | C24H27F2N7O2 | (M+2H)+2    |                      |
| 243.11881 | 2      | 36127.81  | C24H27F2N7O2 | (M+2H)+2    |                      |
| 243.62073 | 2      | 7105.86   | C24H27F2N7O2 | (M+2H)+2    |                      |
| 484.22718 | 1      | 1284613.5 | C24H27F2N7O2 | (M+H)+      |                      |
| 485.23003 | 1      | 333370.47 | C24H27F2N7O2 | (M+H)+      |                      |
| 486.23205 | 1      | 49131.52  | C24H27F2N7O2 | (M+H)+      |                      |
| 242.61765 | 2      | 128896.13 | C24H27F2N7O2 | (M+2H)+2    | 2.73                 |
| 243.11881 | 2      | 36127.81  | C24H27F2N7O2 | (M+2H)+2    | 1.66                 |
| 243.62073 | 2      | 7105.86   | C24H27F2N7O2 | (M+2H)+2    | 4.03                 |
| 484.22718 | 1      | 1284613.5 | C24H27F2N7O2 | (M+H)+      | 0.99                 |
| 485.23003 | 1      | 333370.47 | C24H27F2N7O2 | (M+H)+      | 1.02                 |
| 486.23205 | 1      | 49131.52  | C24H27F2N7O2 | (M+H)+      | -0.34                |

--- End Of Report ---

# Compound 20

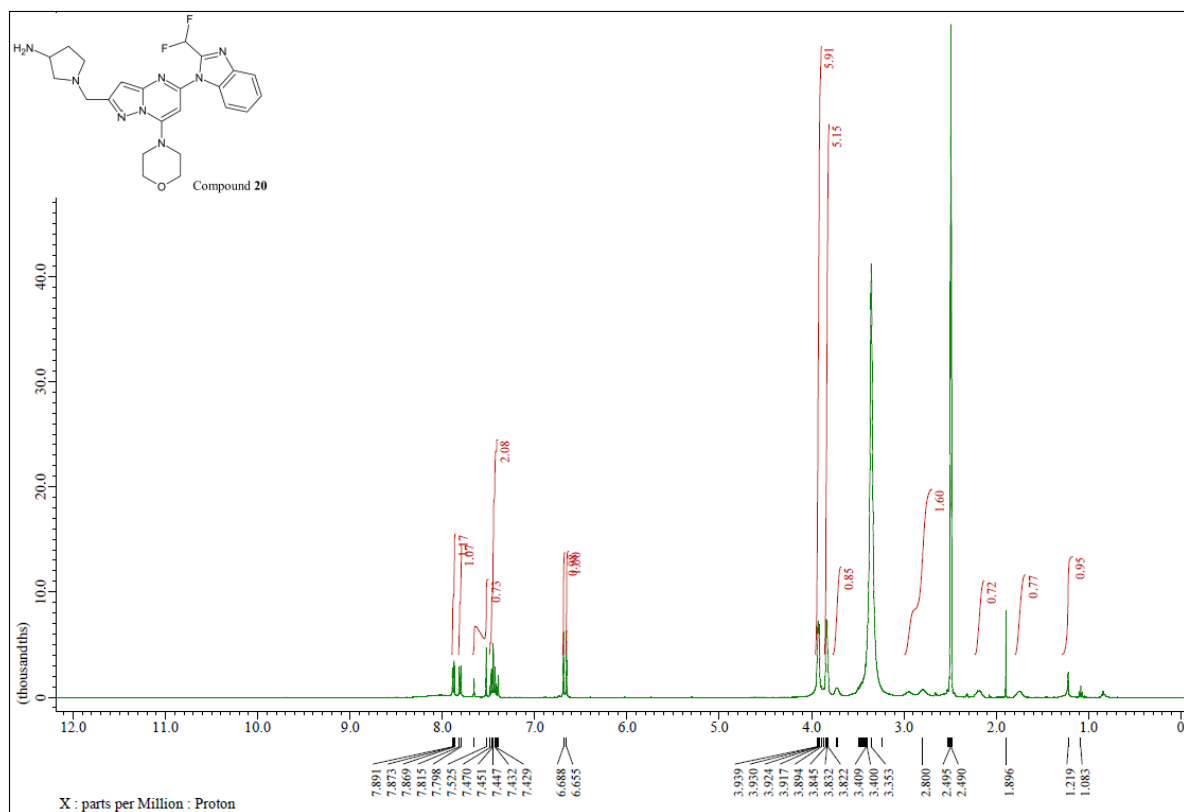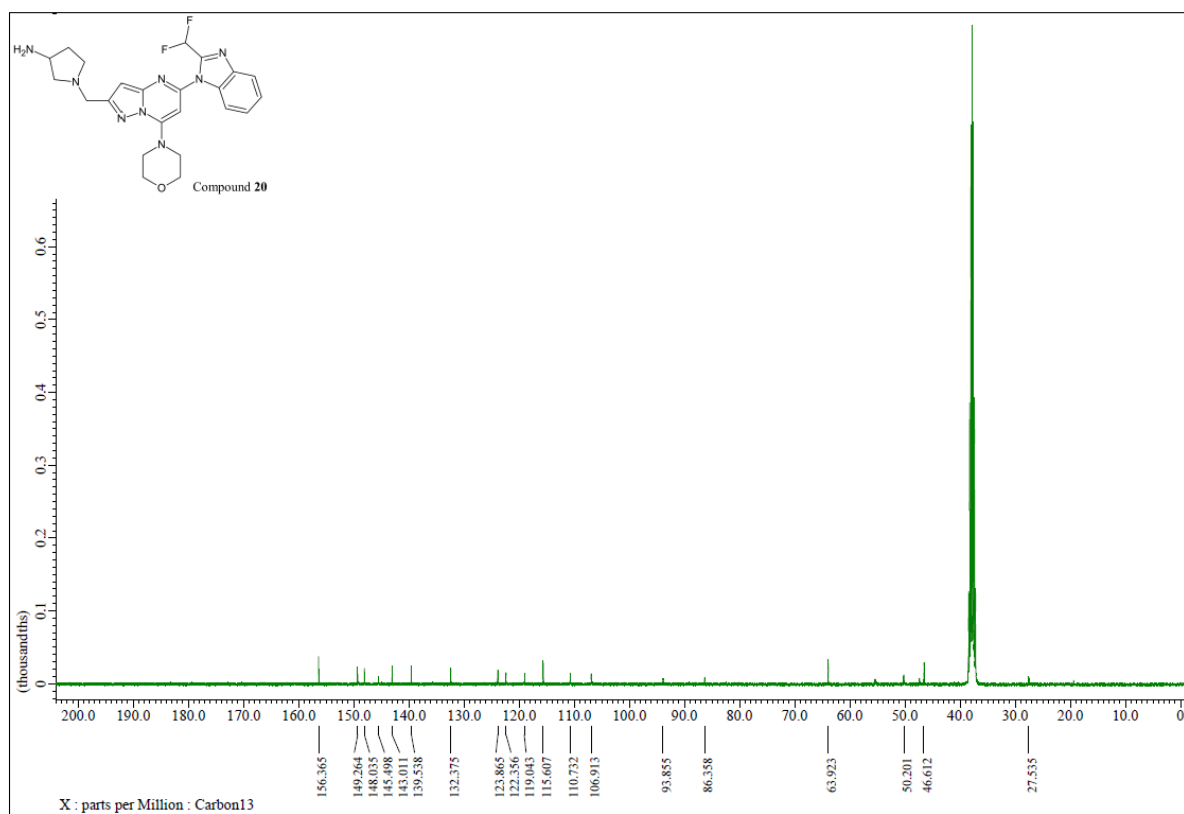

# Compound 20

| Name        | Obs. m/z  | Obs. RT | Obs. Mass | Tgt Formula     | Tgt Mass  | Tgt Mass Error | Find Cpds Algorit |
|-------------|-----------|---------|-----------|-----------------|-----------|----------------|-------------------|
| Compound 20 | 235.11741 | 0.887   | 468.22001 | C23 H26 F2 N8 O | 468.21976 | 0.54           | Find by Formula   |

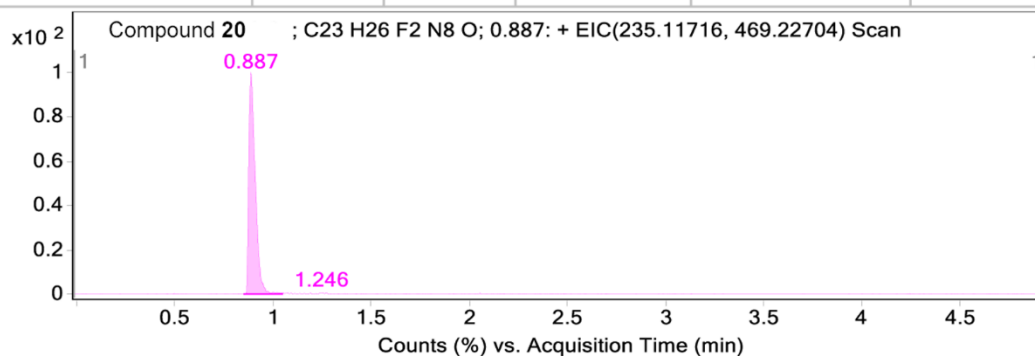

MS Zoomed Spectrum

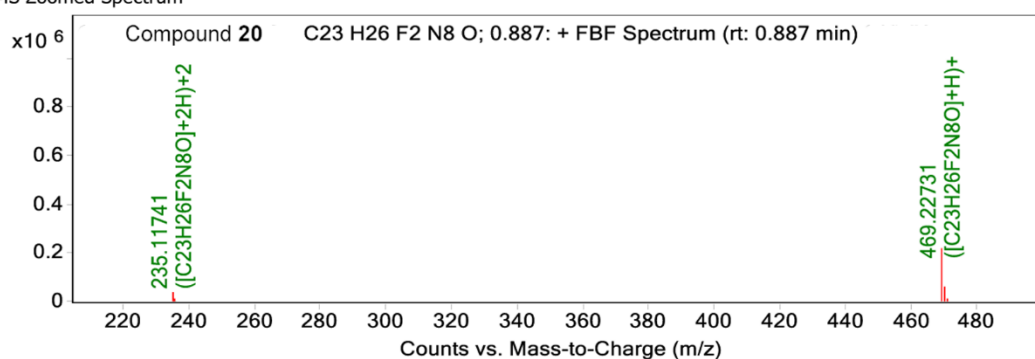

MS Zoomed Spectrum

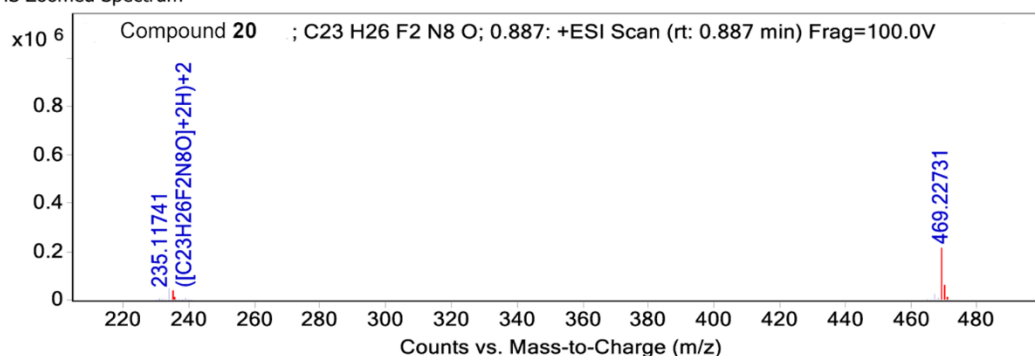

MS Spectrum Peak List

| Obs. m/z  | Charge | Abund     | Formula     | Ion/Isotope | Tgt Mass Error (ppm) |
|-----------|--------|-----------|-------------|-------------|----------------------|
| 235.11741 | 2      | 37955.73  | C23H26F2N8O | (M+2H)+2    |                      |
| 235.61897 | 2      | 10801.02  | C23H26F2N8O | (M+2H)+2    |                      |
| 236.12072 | 2      | 1863.32   | C23H26F2N8O | (M+2H)+2    |                      |
| 469.22731 | 1      | 217069.95 | C23H26F2N8O | (M+H)+      |                      |
| 470.22977 | 1      | 53954.65  | C23H26F2N8O | (M+H)+      |                      |
| 471.23136 | 1      | 7749.8    | C23H26F2N8O | (M+H)+      |                      |
| 235.11741 | 2      | 37955.73  | C23H26F2N8O | (M+2H)+2    | 1.06                 |
| 235.61897 | 2      | 10801.02  | C23H26F2N8O | (M+2H)+2    | 1.88                 |
| 236.12072 | 2      | 1863.32   | C23H26F2N8O | (M+2H)+2    | 3.7                  |
| 469.22731 |        | 217402.84 |             |             | 0.58                 |
| 469.22731 | 1      | 217069.95 | C23H26F2N8O | (M+H)+      | 0.58                 |
| 470.22977 | 1      | 53954.65  | C23H26F2N8O | (M+H)+      | -0.01                |
| 471.23136 | 1      | 7749.8    | C23H26F2N8O | (M+H)+      | -2.23                |

--- End Of Report ---



# Compound 21

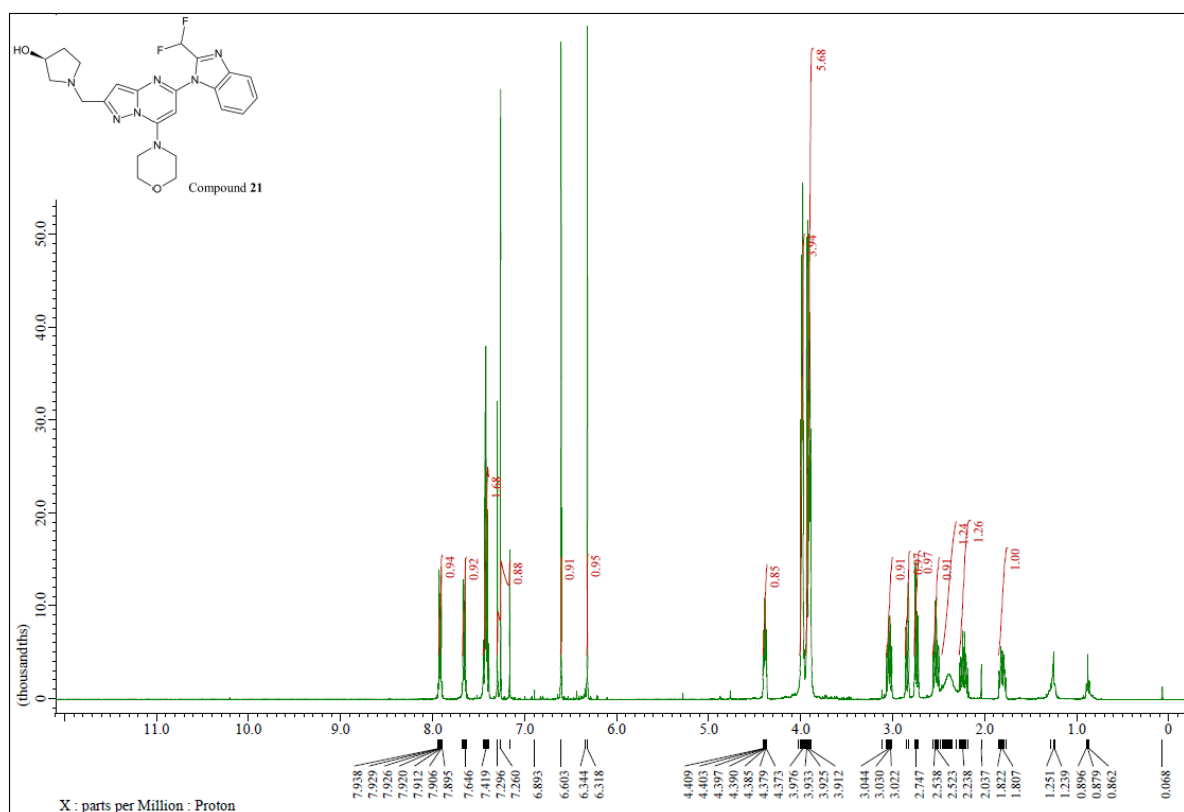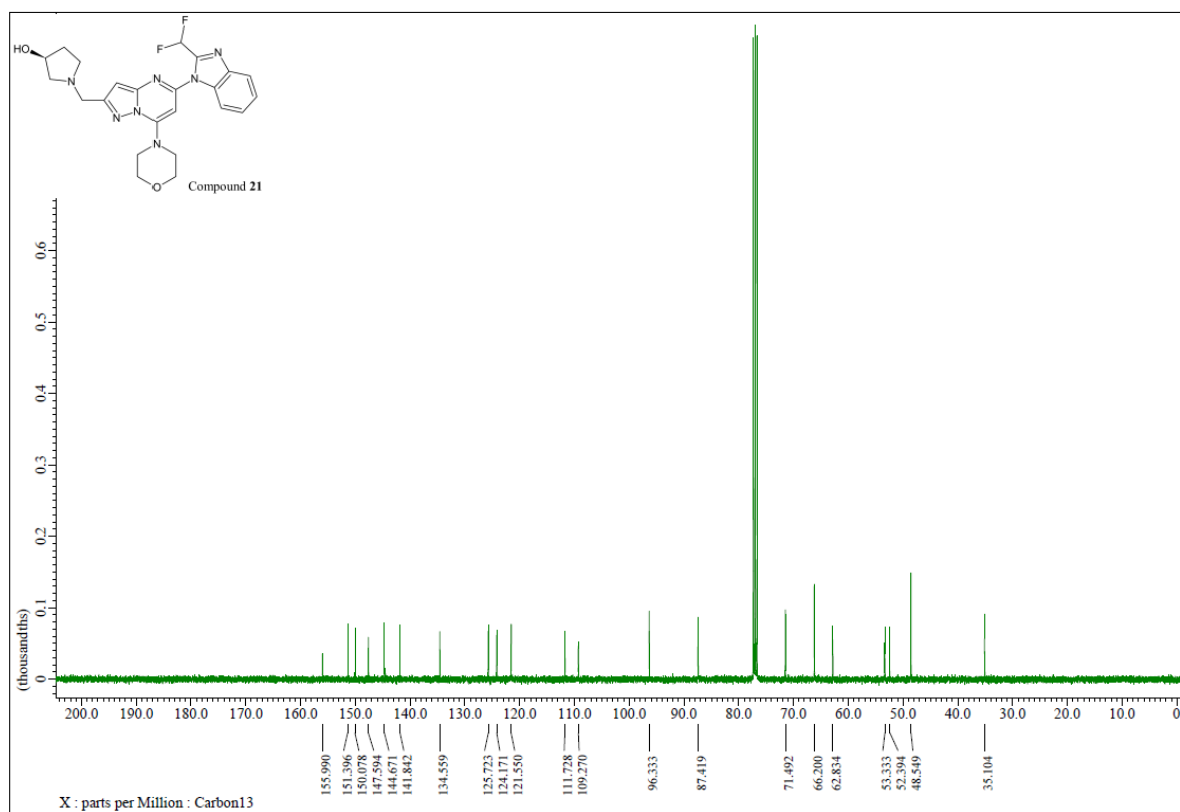

## Compound 21

| Name        | Obs. m/z  | Obs. RT | Obs. Mass | Tgt Formula      | Tgt Mass  | Tgt Mass Error | Find Cpds Algorith |
|-------------|-----------|---------|-----------|------------------|-----------|----------------|--------------------|
| Compound 21 | 235.60959 | 1.18    | 469.20435 | C23 H25 F2 N7 O2 | 469.20378 | 1.21           | Find by Formula    |

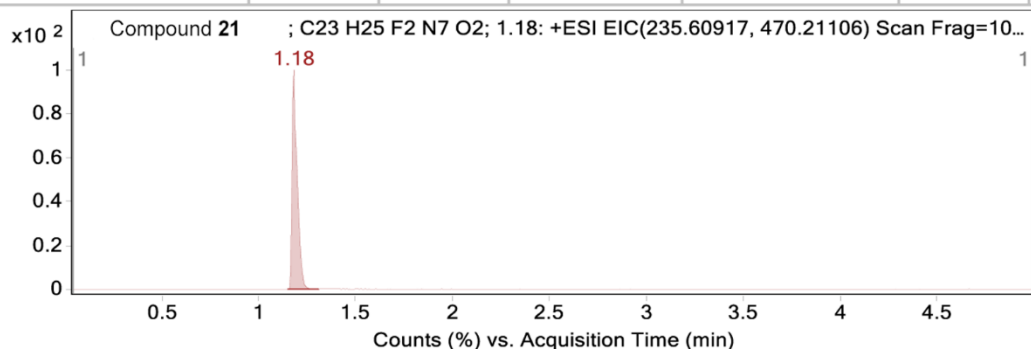

MS Zoomed Spectrum

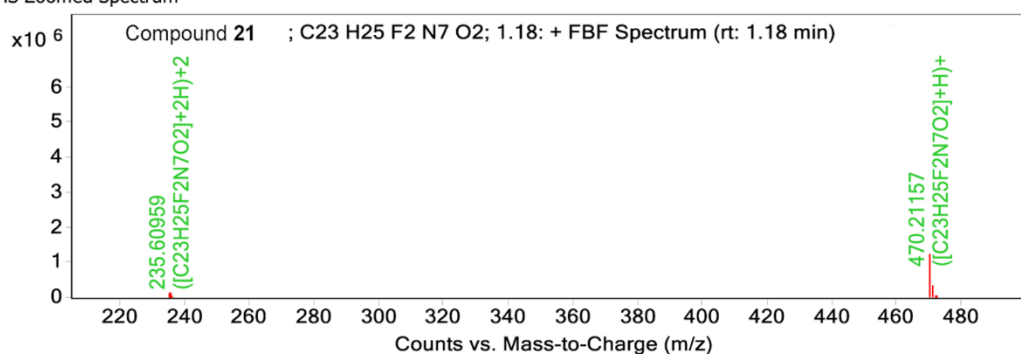

MS Zoomed Spectrum

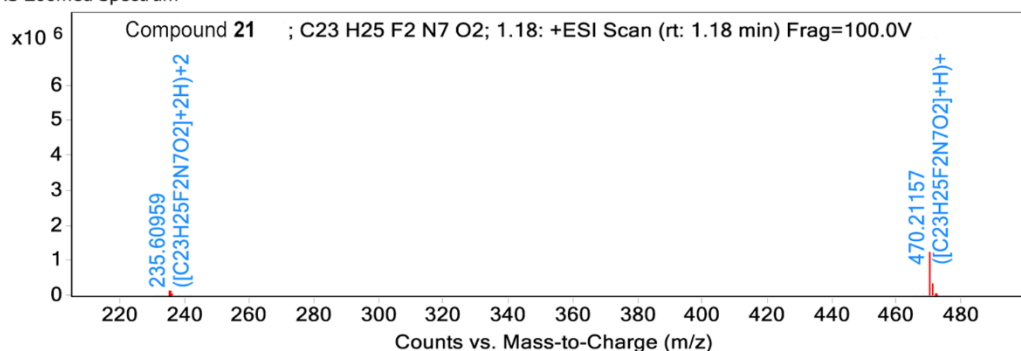

MS Spectrum Peak List

| Obs. m/z  | Charge | Abund      | Formula      | Ion/Isotope | Tgt Mass Error (ppm) |
|-----------|--------|------------|--------------|-------------|----------------------|
| 235.60959 | 2      | 125434.16  | C23H25F2N7O2 | (M+2H)+2    |                      |
| 236.11085 | 2      | 38404.56   | C23H25F2N7O2 | (M+2H)+2    |                      |
| 236.61302 | 2      | 4518.14    | C23H25F2N7O2 | (M+2H)+2    |                      |
| 237.11164 | 2      | 465.8      | C23H25F2N7O2 | (M+2H)+2    |                      |
| 470.21157 | 1      | 1232616.63 | C23H25F2N7O2 | (M+H)+      |                      |
| 471.21462 | 1      | 290558.94  | C23H25F2N7O2 | (M+H)+      |                      |
| 472.21628 | 1      | 40423.04   | C23H25F2N7O2 | (M+H)+      |                      |
| 235.60959 | 2      | 125434.16  | C23H25F2N7O2 | (M+2H)+2    | 1.79                 |
| 236.11085 | 2      | 38404.56   | C23H25F2N7O2 | (M+2H)+2    | 1.19                 |
| 236.61302 | 2      | 4518.14    | C23H25F2N7O2 | (M+2H)+2    | 4.73                 |
| 237.11164 | 2      | 465.8      | C23H25F2N7O2 | (M+2H)+2    | -6.44                |
| 470.21157 | 1      | 1232616.63 | C23H25F2N7O2 | (M+H)+      | 1.1                  |
| 471.21462 | 1      | 290558.94  | C23H25F2N7O2 | (M+H)+      | 1.6                  |
| 472.21628 | 1      | 40423.04   | C23H25F2N7O2 | (M+H)+      | -0.49                |

--- End Of Report ---

# Compound 22

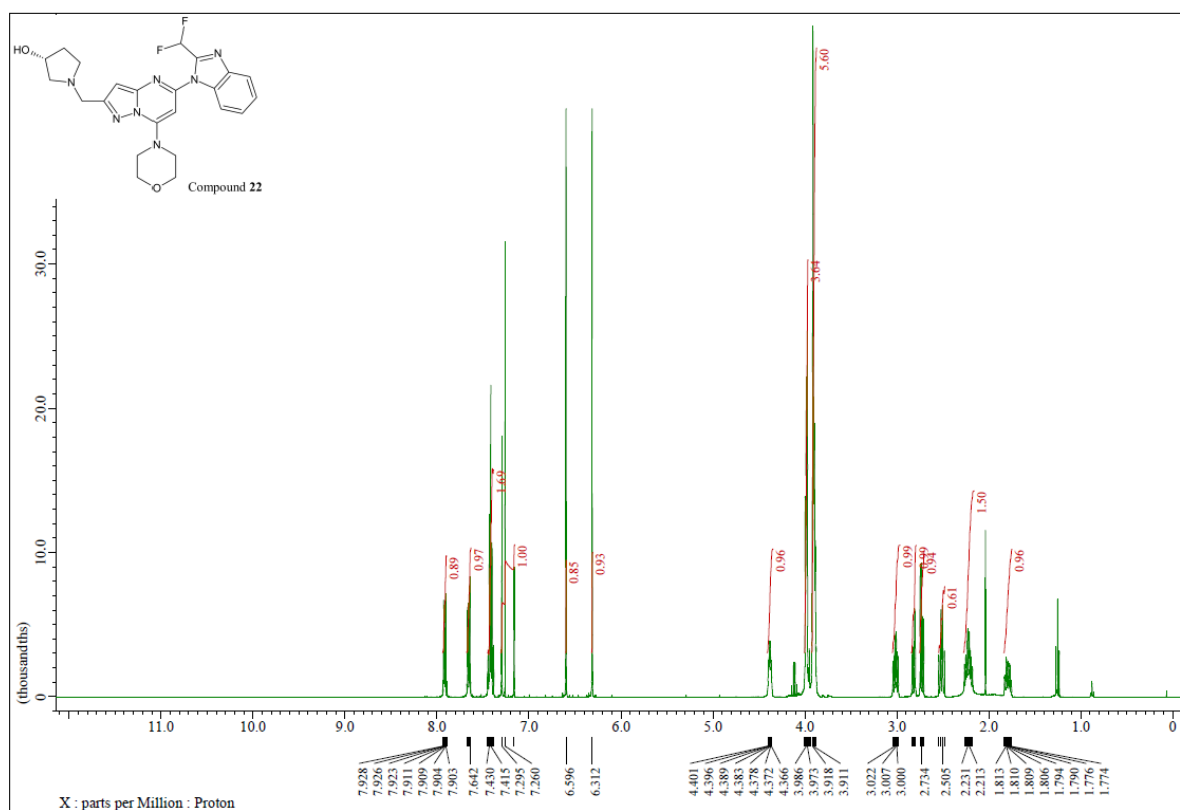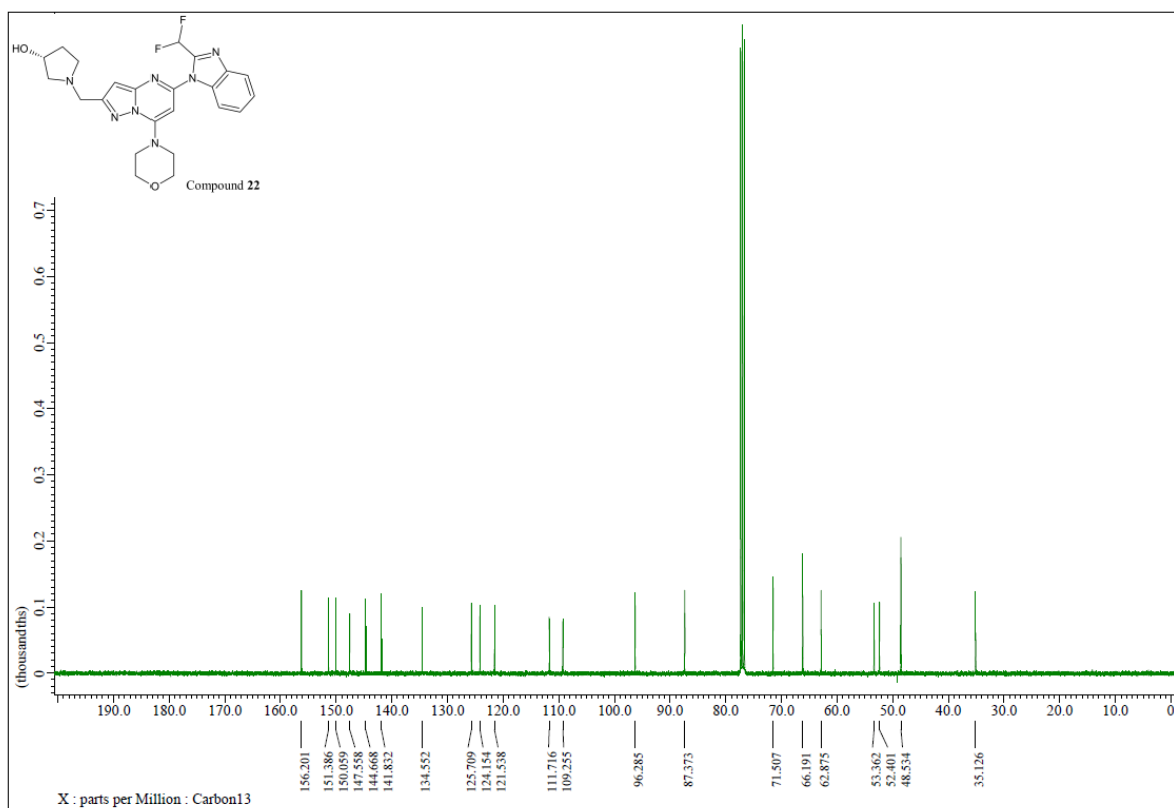

## Compound 22

| Name        | Obs. m/z  | Obs. RT | Obs. Mass | Tgt Formula      | Tgt Mass  | Tgt Mass Error | Find Cpds Algorith |
|-------------|-----------|---------|-----------|------------------|-----------|----------------|--------------------|
| Compound 22 | 235.60958 | 1.19    | 469.20426 | C23 H25 F2 N7 O2 | 469.20378 | 1.03           | Find by Formula    |

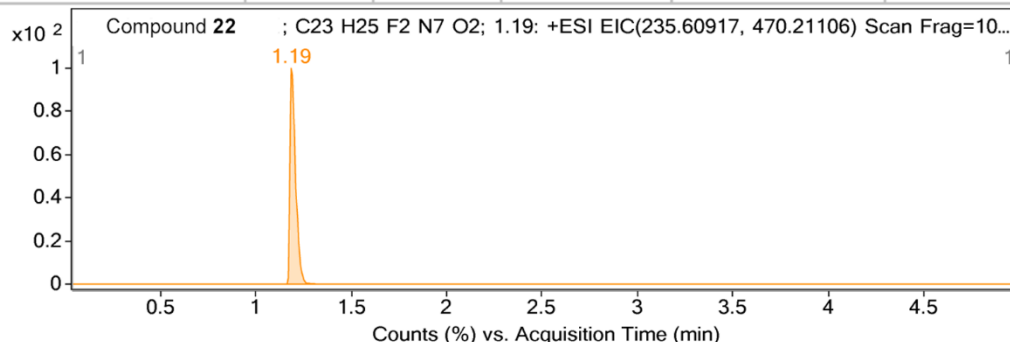

MS Zoomed Spectrum

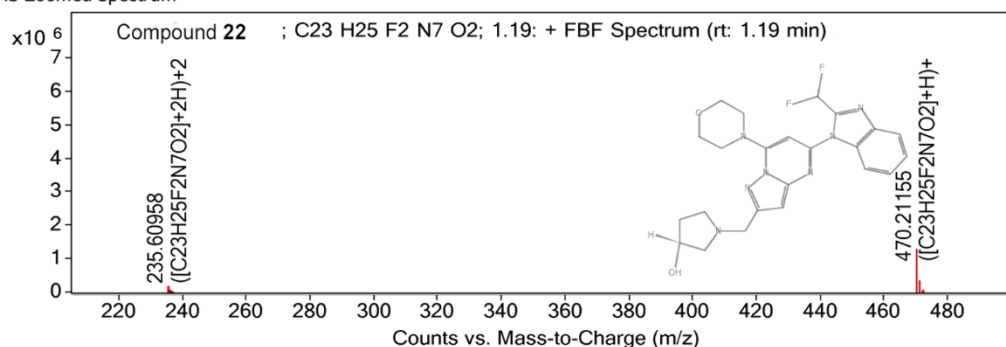

MS Zoomed Spectrum

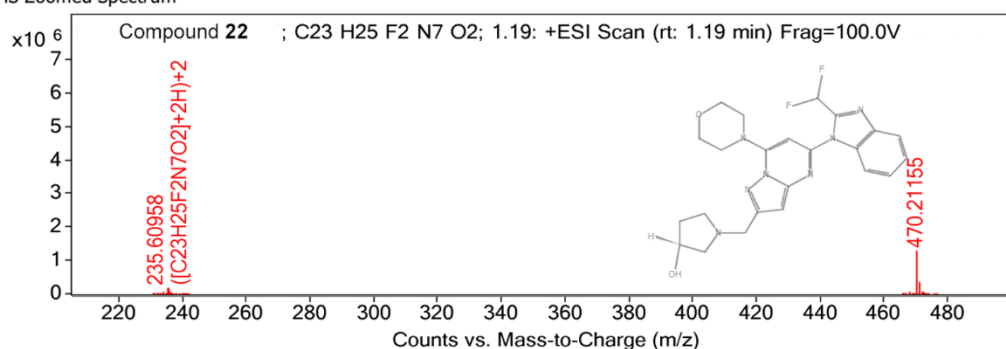

MS Spectrum Peak List

| Obs. m/z  | Charge | Abund      | Formula      | Ion/Isotope | Tgt Mass Error (ppm) |
|-----------|--------|------------|--------------|-------------|----------------------|
| 235.60958 | 2      | 145539.42  | C23H25F2N7O2 | (M+2H)+2    |                      |
| 236.11083 | 2      | 42062.38   | C23H25F2N7O2 | (M+2H)+2    |                      |
| 236.61221 | 2      | 5847.81    | C23H25F2N7O2 | (M+2H)+2    |                      |
| 237.11271 | 2      | 301.78     | C23H25F2N7O2 | (M+2H)+2    |                      |
| 470.21155 | 1      | 1273827.38 | C23H25F2N7O2 | (M+H)+      |                      |
| 471.21422 | 1      | 320760.09  | C23H25F2N7O2 | (M+H)+      |                      |
| 472.21647 | 1      | 44783.03   | C23H25F2N7O2 | (M+H)+      |                      |
| 235.60958 | 2      | 145539.42  | C23H25F2N7O2 | (M+2H)+2    | 1.74                 |
| 236.11083 | 2      | 42062.38   | C23H25F2N7O2 | (M+2H)+2    | 1.11                 |
| 236.61221 | 2      | 5847.81    | C23H25F2N7O2 | (M+2H)+2    | 1.32                 |
| 237.11271 | 2      | 301.78     | C23H25F2N7O2 | (M+2H)+2    | -1.95                |
| 470.21155 | 1      | 1273827.38 | C23H25F2N7O2 | (M+H)+      | 1.06                 |
| 470.21155 |        | 1274626.38 |              |             |                      |
| 471.21422 | 1      | 320760.09  | C23H25F2N7O2 | (M+H)+      | 0.75                 |
| 472.21647 | 1      | 44783.03   | C23H25F2N7O2 | (M+H)+      | -0.09                |

--- End Of Report ---

# Compound 23

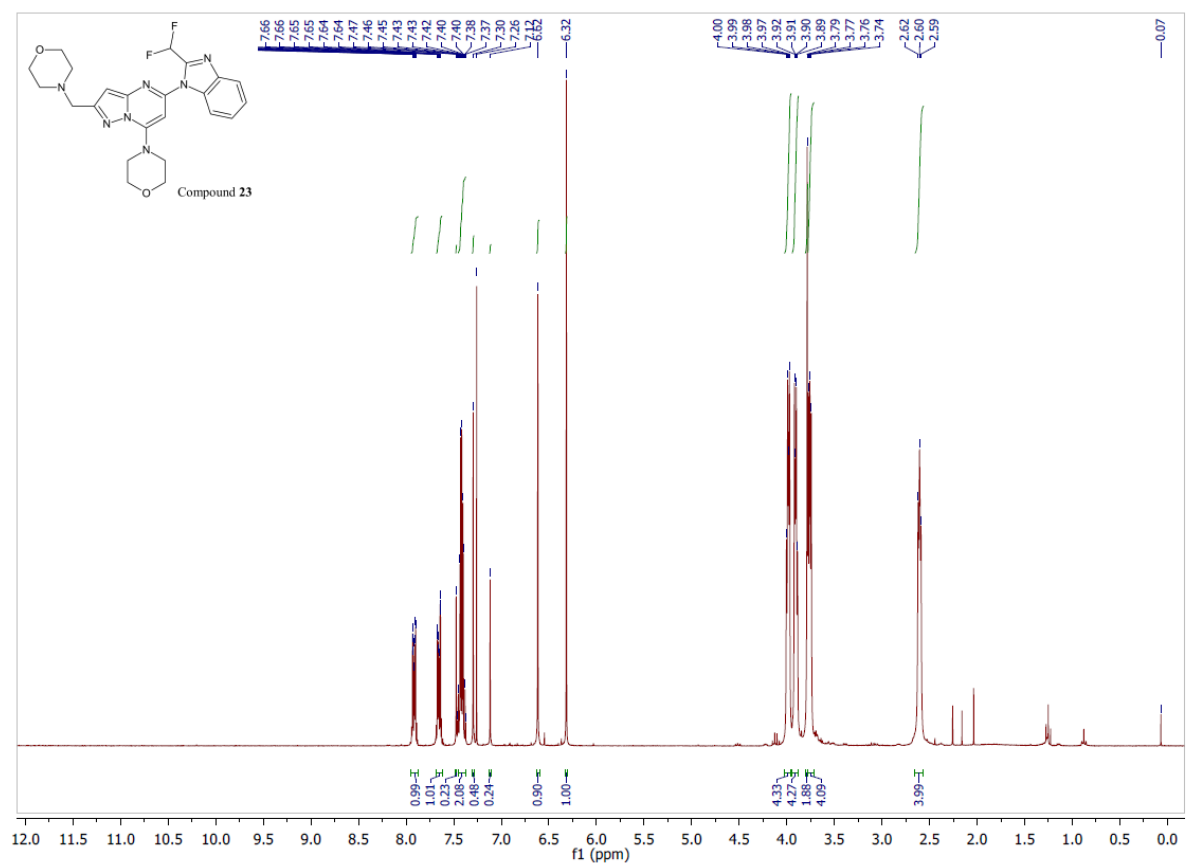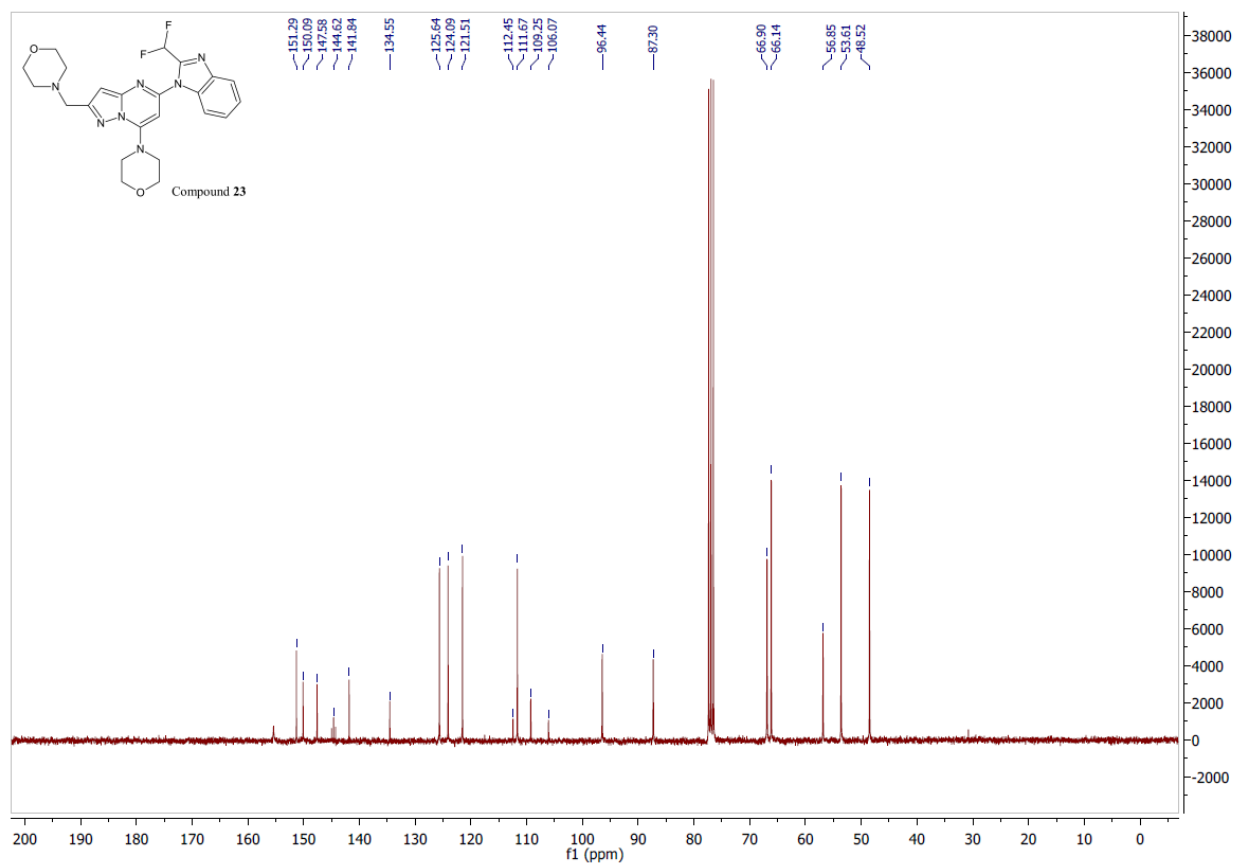

## Compound 23

| Name        | Obs. m/z  | Obs. RT | Obs. Mass | Tgt Formula      | Tgt Mass  | Tgt Mass Error | Find Cpd<br>Algorit |
|-------------|-----------|---------|-----------|------------------|-----------|----------------|---------------------|
| Compound 23 | 470.21136 | 1.21    | 469.20417 | C23 H25 F2 N7 O2 | 469.20378 | 0.84           | Find by<br>Formula  |

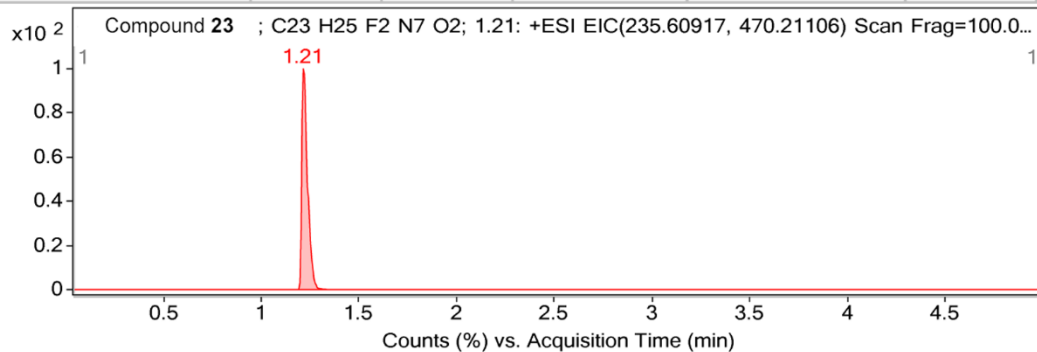

MS Zoomed Spectrum

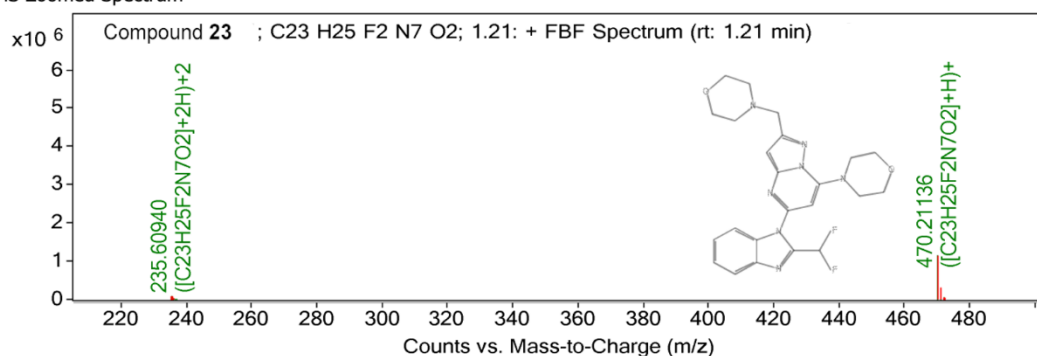

MS Zoomed Spectrum

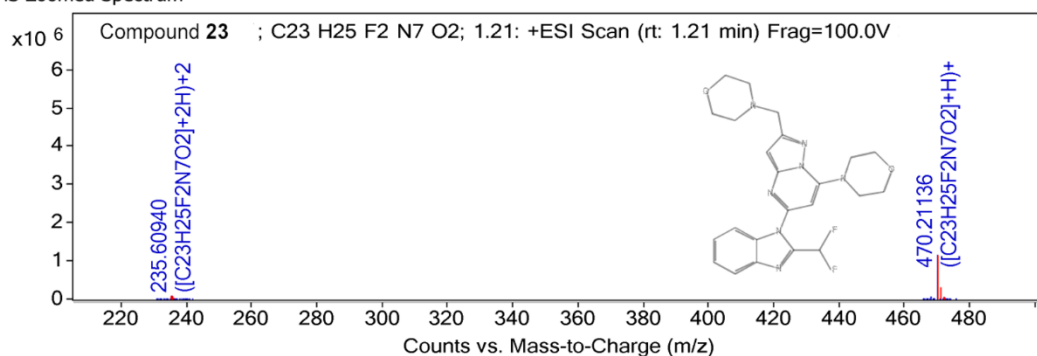

MS Spectrum Peak List

| Obs. m/z  | Charge | Abund      | Formula      | Ion/Isotope | Tgt Mass Error (ppm) |
|-----------|--------|------------|--------------|-------------|----------------------|
| 235.6094  | 2      | 80044.54   | C23H25F2N7O2 | (M+2H)+2    |                      |
| 236.11123 | 2      | 24413.55   | C23H25F2N7O2 | (M+2H)+2    |                      |
| 236.61164 | 2      | 3186       | C23H25F2N7O2 | (M+2H)+2    |                      |
| 237.11175 | 2      | 553.57     | C23H25F2N7O2 | (M+2H)+2    |                      |
| 470.21136 | 1      | 1140152.63 | C23H25F2N7O2 | (M+H)+      |                      |
| 471.21459 | 1      | 286698.06  | C23H25F2N7O2 | (M+H)+      |                      |
| 472.21642 | 1      | 41395.54   | C23H25F2N7O2 | (M+H)+      |                      |
| 235.6094  | 2      | 80044.54   | C23H25F2N7O2 | (M+2H)+2    | 0.99                 |
| 236.11123 | 2      | 24413.55   | C23H25F2N7O2 | (M+2H)+2    | 2.78                 |
| 236.61164 | 2      | 3186       | C23H25F2N7O2 | (M+2H)+2    | -1.08                |
| 237.11175 | 2      | 553.57     | C23H25F2N7O2 | (M+2H)+2    | -5.98                |
| 470.21136 | 1      | 1140152.63 | C23H25F2N7O2 | (M+H)+      | 0.65                 |
| 471.21459 | 1      | 286698.06  | C23H25F2N7O2 | (M+H)+      | 1.53                 |
| 472.21642 | 1      | 41395.54   | C23H25F2N7O2 | (M+H)+      | -0.2                 |

--- End Of Report ---

# Compound 24

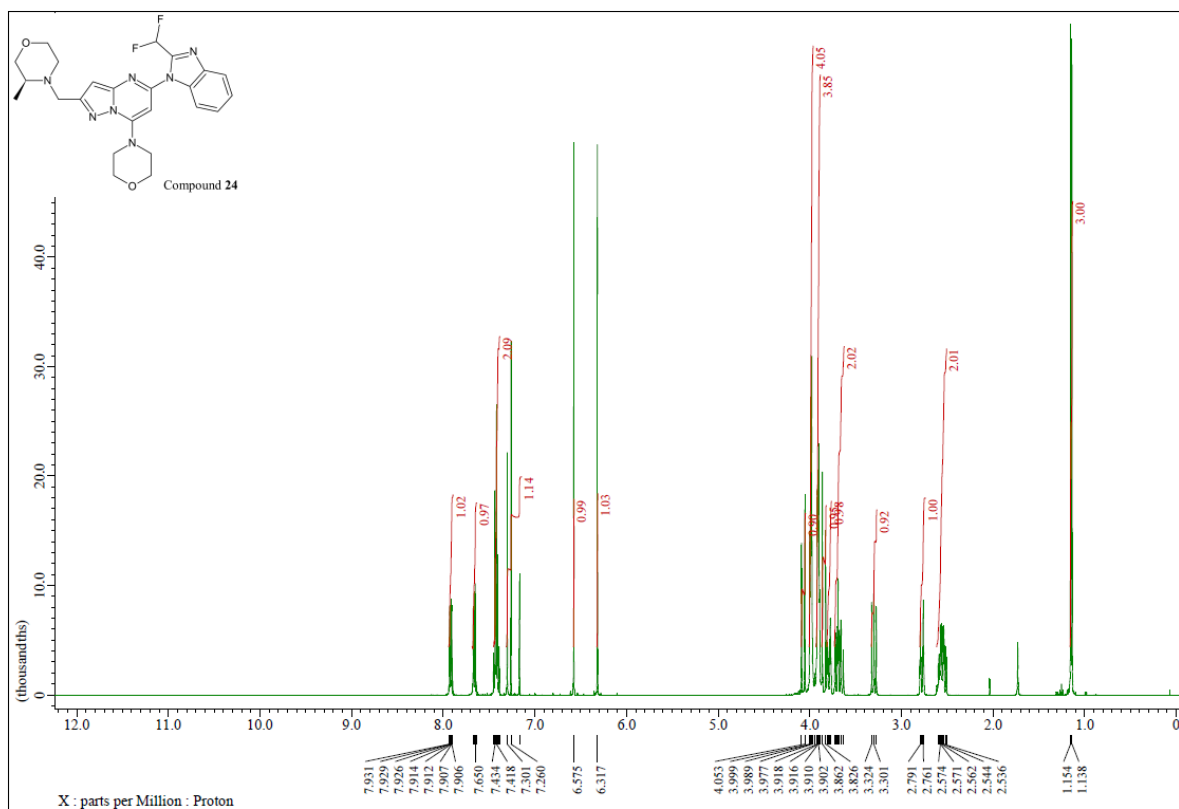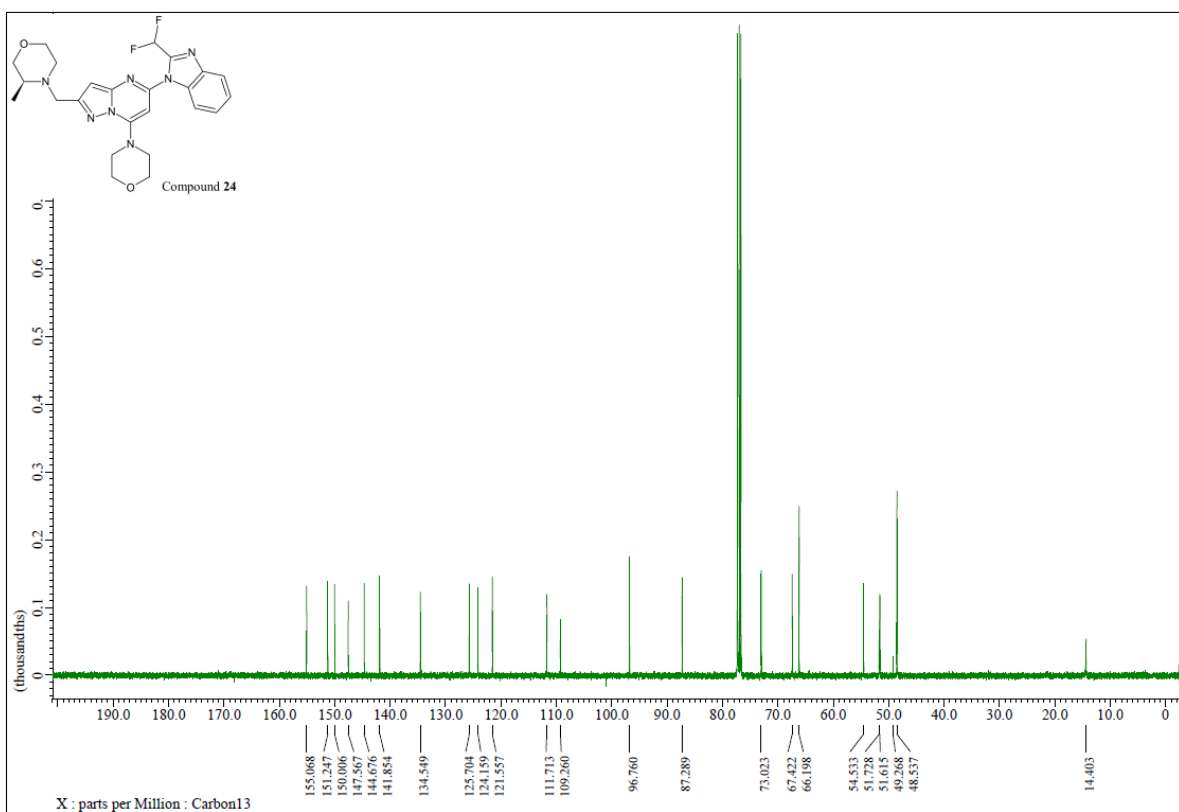

## Compound 24

| Name        | Obs. m/z | Obs. RT | Obs. Mass | Tgt Formula      | Tgt Mass | Tgt Mass Error | Find Cpds Aloorith |
|-------------|----------|---------|-----------|------------------|----------|----------------|--------------------|
| Compound 24 | 484.2269 | 1.18    | 483.2196  | C24 H27 F2 N7 O2 | 483.2194 | 0.28           | Find by Formula    |

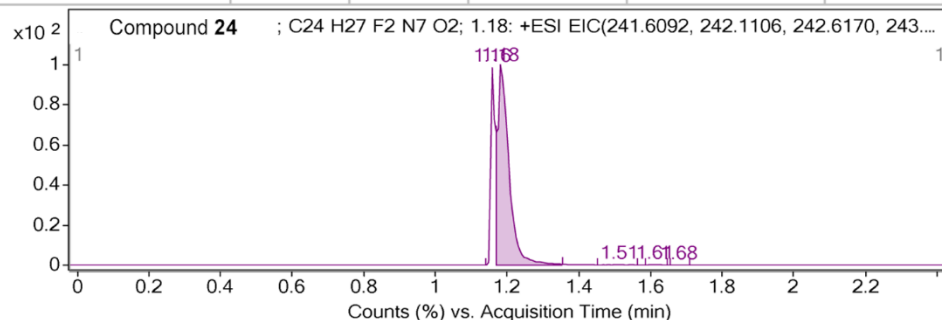

MS Zoomed Spectrum

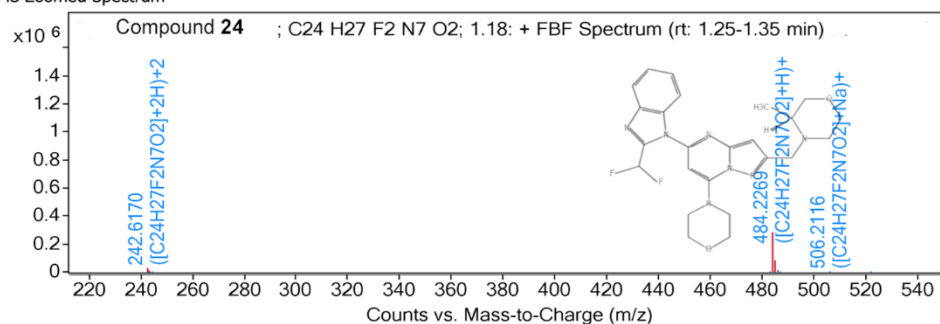

MS Zoomed Spectrum

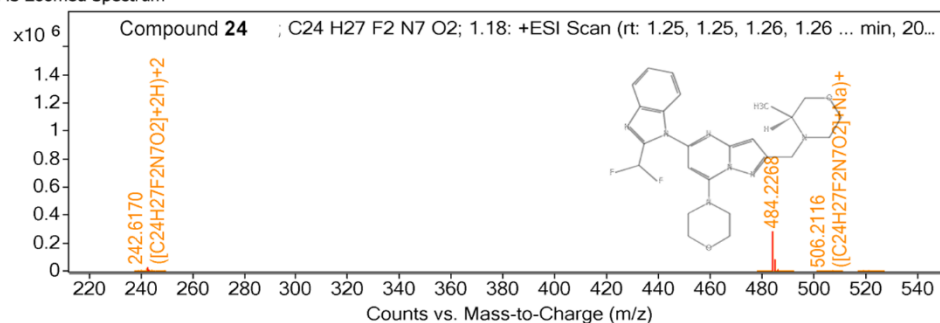

MS Spectrum Peak List

| Obs. m/z | Charge | Abund    | Formula      | Ion/Isotope | Tgt Mass Error (ppm) |
|----------|--------|----------|--------------|-------------|----------------------|
| 242.617  | 2      | 23954.76 | C24H27F2N7O2 | (M+2H)+2    |                      |
| 243.1188 | 2      | 7445.91  | C24H27F2N7O2 | (M+2H)+2    |                      |
| 243.6196 | 2      | 1176.52  | C24H27F2N7O2 | (M+2H)+2    |                      |
| 483.219  | 1      | 463.12   | C24H27F2N7O2 | M+          |                      |
| 484.2269 | 1      | 282509   | C24H27F2N7O2 | (M+H)+      |                      |
| 485.2295 | 1      | 79724.67 | C24H27F2N7O2 | (M+H)+      |                      |
| 486.2323 | 1      | 12347.87 | C24H27F2N7O2 | (M+H)+      |                      |
| 487.2351 | 1      | 1594.3   | C24H27F2N7O2 | (M+H)+      |                      |
| 506.2116 | 1      | 253.18   | C24H27F2N7O2 | (M+Na)+     |                      |
| 522.1799 | 1      | 175.05   | C24H27F2N7O2 | (M+K)+      |                      |
| 242.617  | 2      | 23954.76 | C24H27F2N7O2 | (M+2H)+2    | 0.23                 |
| 243.1188 | 2      | 7445.91  | C24H27F2N7O2 | (M+2H)+2    | 1.66                 |
| 243.6196 | 2      | 1176.52  | C24H27F2N7O2 | (M+2H)+2    | -0.52                |
| 483.219  | 1      | 463.12   | C24H27F2N7O2 | M+          | 0.26                 |
| 484.2269 | 1      | 282509   | C24H27F2N7O2 | (M+H)+      | 0.33                 |
| 485.2295 | 1      | 79724.67 | C24H27F2N7O2 | (M+H)+      | 0.02                 |
| 486.2323 | 1      | 12347.87 | C24H27F2N7O2 | (M+H)+      | 0.15                 |
| 487.2351 | 1      | 1594.3   | C24H27F2N7O2 | (M+H)+      | 0.7                  |
| 506.2116 | 1      | 253.18   | C24H27F2N7O2 | (M+Na)+     | 5.76                 |
| 522.1799 | 1      | 175.05   | C24H27F2N7O2 | (M+K)+      | -5.13                |

--- End Of Report ---



### Compound 25

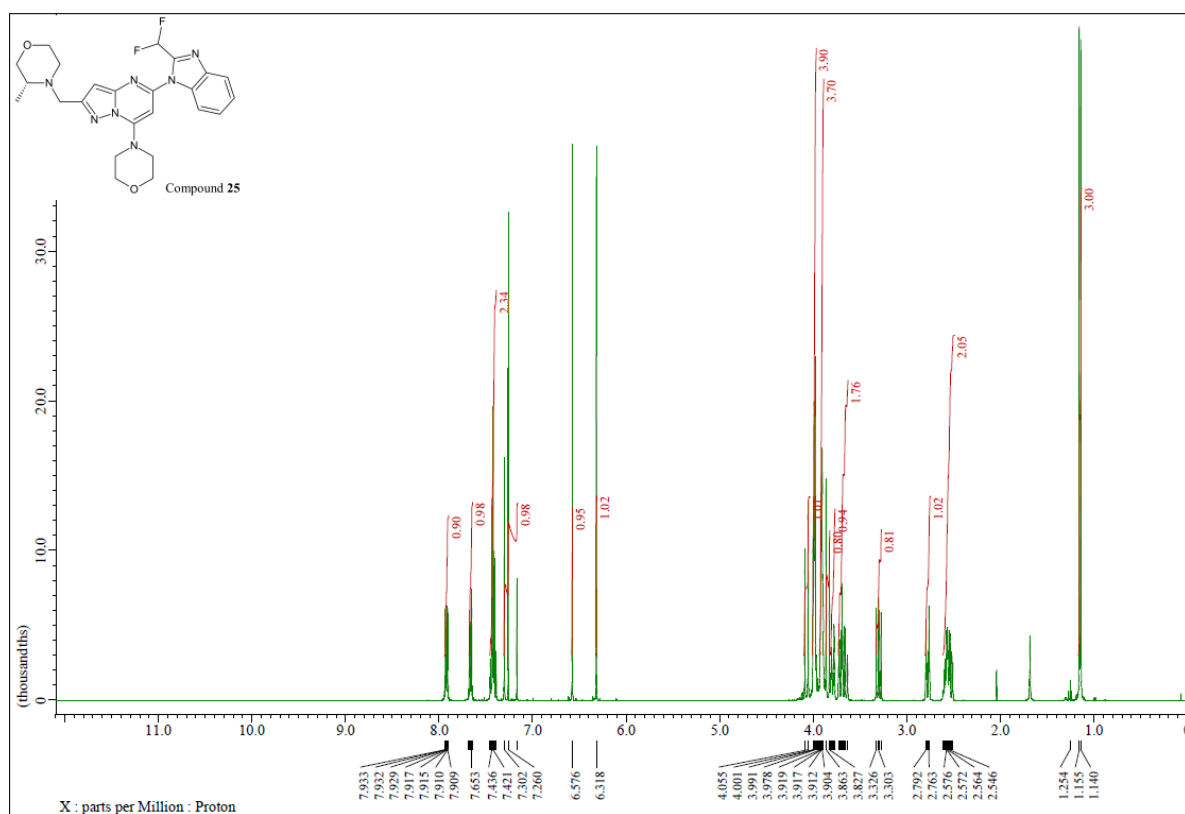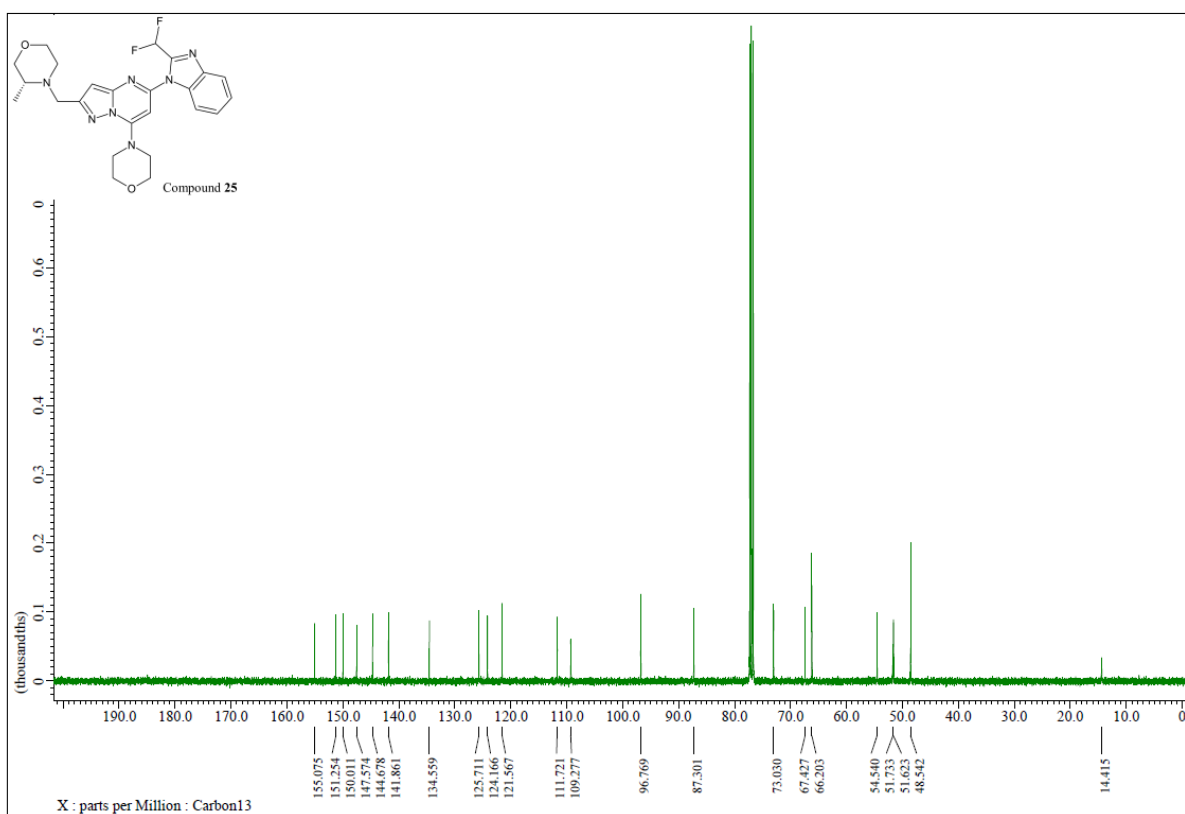

## Compound 25

| Name        | Obs. m/z | Obs. RT | Obs. Mass | Tgt Formula      | Tgt Mass | Tgt Mass Error | Find Cpds Alaorith Find by Formula |
|-------------|----------|---------|-----------|------------------|----------|----------------|------------------------------------|
| Compound 25 | 484.2268 | 1.18    | 483.2195  | C24 H27 F2 N7 O2 | 483.2194 | 0.06           |                                    |

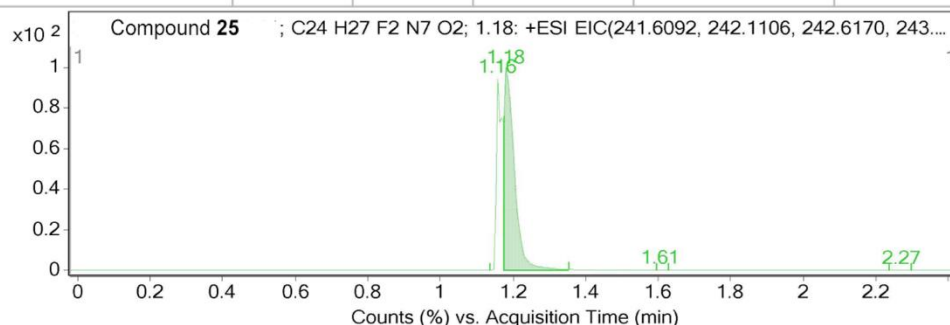

MS Zoomed Spectrum

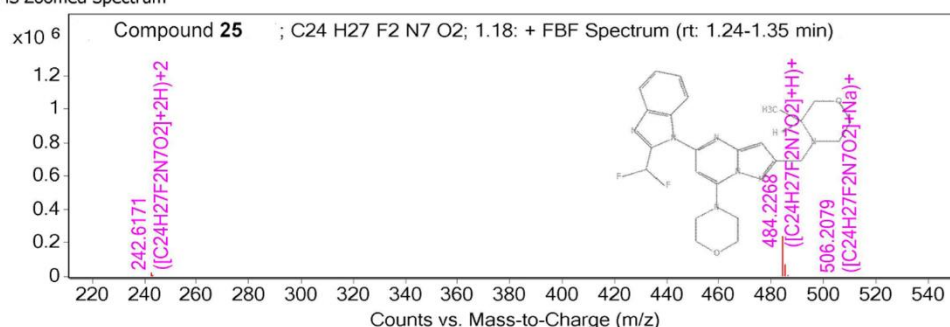

MS Zoomed Spectrum

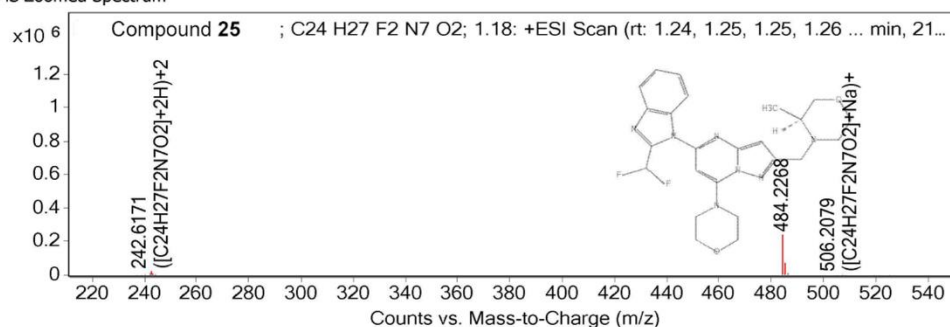

MS Spectrum Peak List

| Obs. m/z | Charge | Abund     | Formula      | Ion/Isotope | Tgt Mass Error (ppm) |
|----------|--------|-----------|--------------|-------------|----------------------|
| 241.6083 | 2      | 349.53    | C24H27F2N7O2 | M+2         |                      |
| 242.6171 | 2      | 19071.85  | C24H27F2N7O2 | (M+2H)+2    |                      |
| 243.119  | 2      | 6438.57   | C24H27F2N7O2 | (M+2H)+2    |                      |
| 243.619  | 2      | 918.06    | C24H27F2N7O2 | (M+2H)+2    |                      |
| 484.2268 | 1      | 239466.45 | C24H27F2N7O2 | (M+H)+      |                      |
| 485.2293 | 1      | 67776.46  | C24H27F2N7O2 | (M+H)+      |                      |
| 486.2318 | 1      | 9900.11   | C24H27F2N7O2 | (M+H)+      |                      |
| 487.2347 | 1      | 1392.6    | C24H27F2N7O2 | (M+H)+      |                      |
| 506.2079 | 1      | 302.17    | C24H27F2N7O2 | (M+Na)+     |                      |
| 522.1879 | 1      | 143.76    | C24H27F2N7O2 | (M+K)+      |                      |
| 241.6083 | 2      | 349.53    | C24H27F2N7O2 | M+2         | -3.76                |
| 242.6171 | 2      | 19071.85  | C24H27F2N7O2 | (M+2H)+2    | 0.44                 |
| 243.119  | 2      | 6438.57   | C24H27F2N7O2 | (M+2H)+2    | 2.36                 |
| 243.619  | 2      | 918.06    | C24H27F2N7O2 | (M+2H)+2    | -2.94                |
| 484.2268 | 1      | 239466.45 | C24H27F2N7O2 | (M+H)+      | 0.15                 |
| 485.2293 | 1      | 67776.46  | C24H27F2N7O2 | (M+H)+      | -0.43                |
| 486.2318 | 1      | 9900.11   | C24H27F2N7O2 | (M+H)+      | -0.78                |
| 487.2347 | 1      | 1392.6    | C24H27F2N7O2 | (M+H)+      | -0.16                |
| 506.2079 | 1      | 302.17    | C24H27F2N7O2 | (M+Na)+     | -1.49                |
| 522.1879 | 1      | 143.76    | C24H27F2N7O2 | (M+K)+      | 10.09                |

--- End Of Report ---

# Compound 26

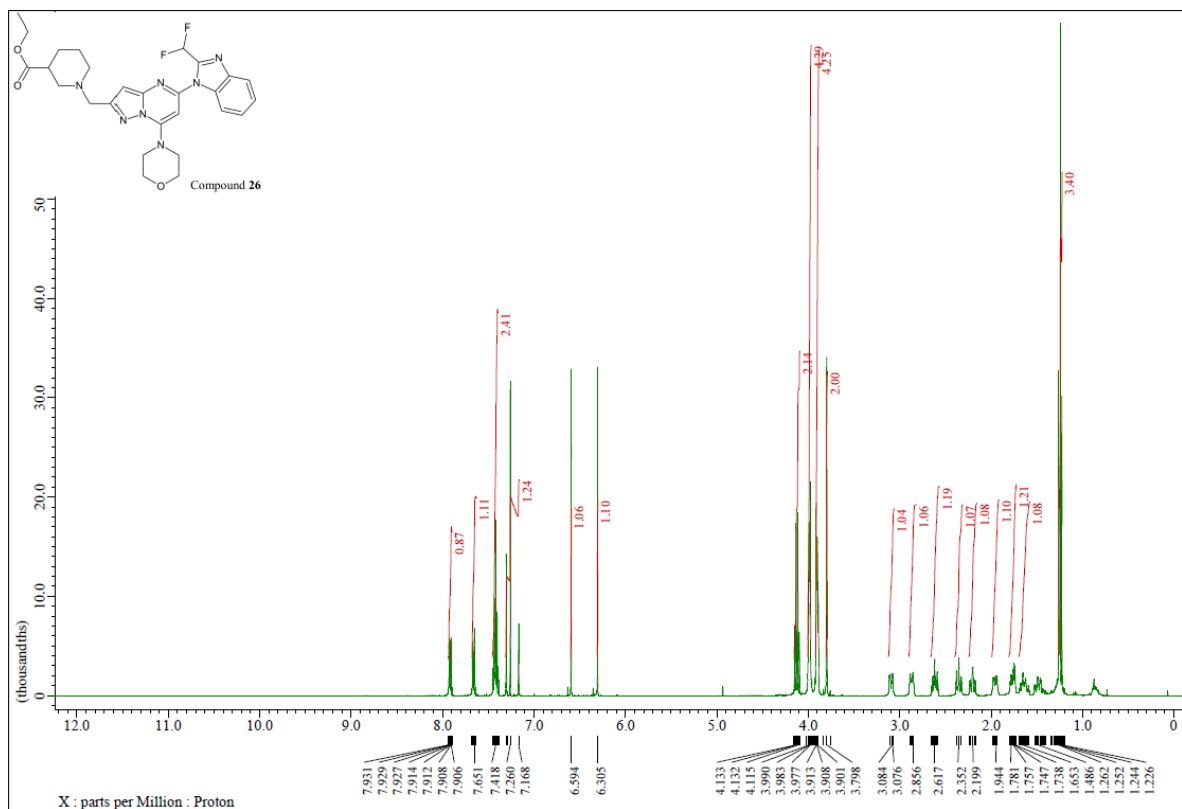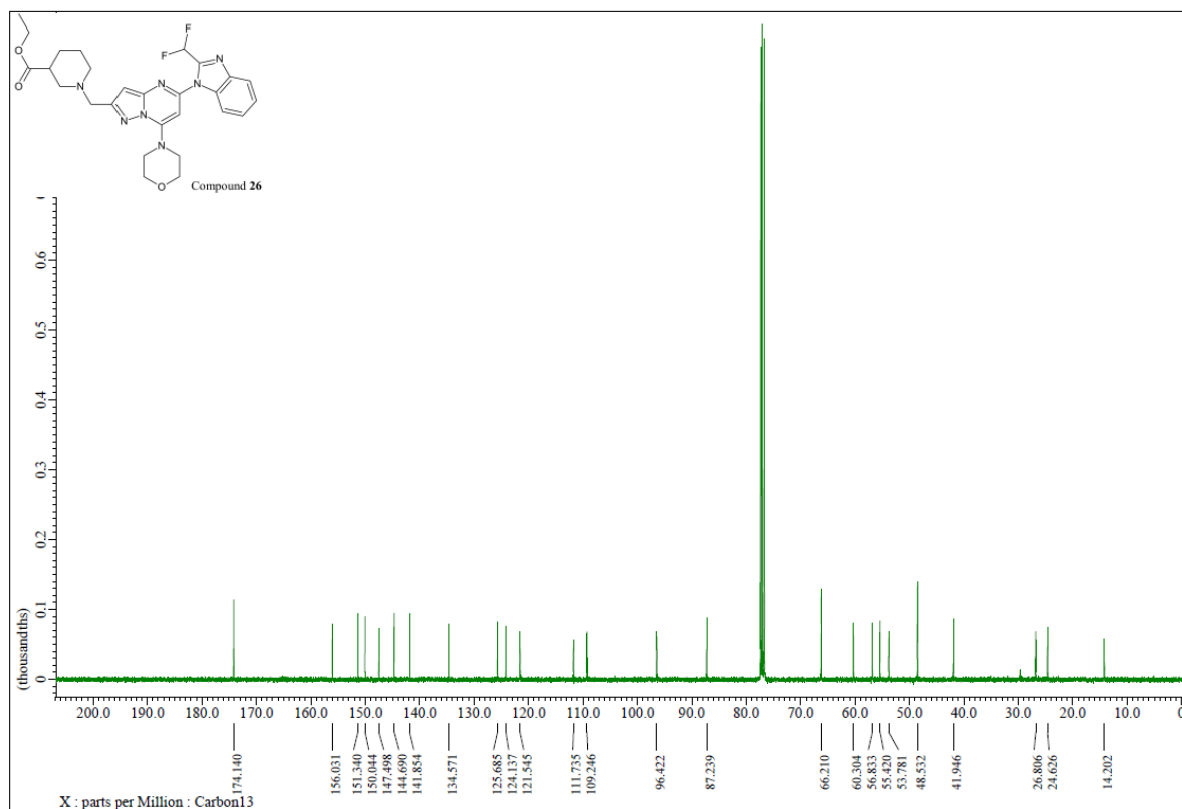

# Compound 26

| Name        | Obs. m/z  | Obs. RT | Obs. Mass | Tgt Formula      | Tgt Mass  | Tgt Mass Error | Find Cpd's Algorit |
|-------------|-----------|---------|-----------|------------------|-----------|----------------|--------------------|
| Compound 26 | 270.63066 | 1.45    | 539.24629 | C27 H31 F2 N7 O3 | 539.24564 | 1.19           | Find by Formula    |

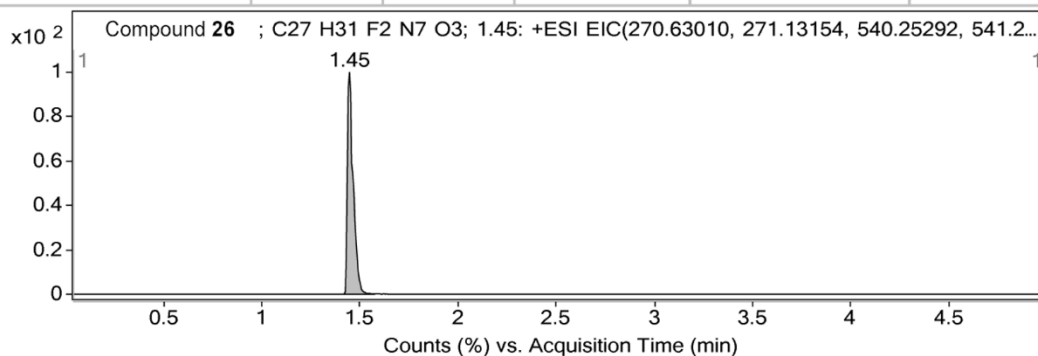

MS Zoomed Spectrum

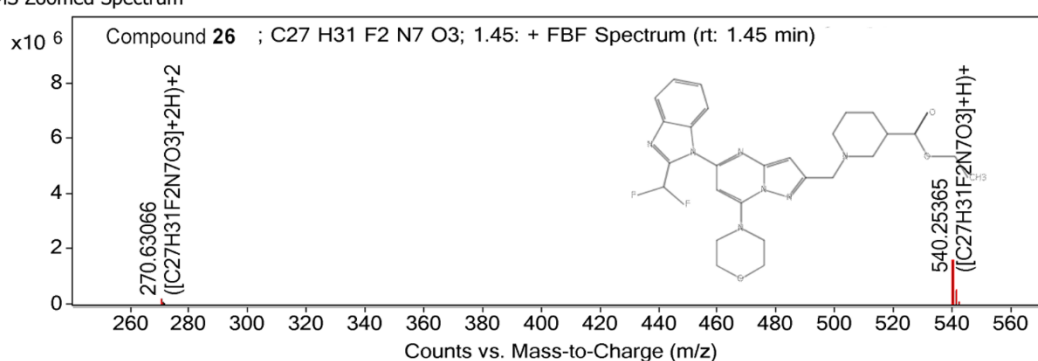

MS Zoomed Spectrum

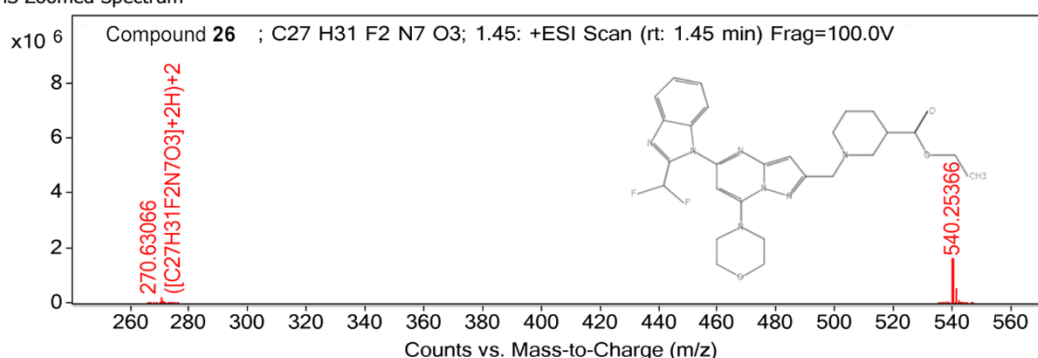

MS Spectrum Peak List

| Obs. m/z  | Charge | Abund      | Formula      | Ion/Isotope | Tgt Mass Error (ppm) |
|-----------|--------|------------|--------------|-------------|----------------------|
| 270.63066 | 2      | 179367.64  | C27H31F2N7O3 | (M+2H)+2    |                      |
| 271.13199 | 2      | 57800.48   | C27H31F2N7O3 | (M+2H)+2    |                      |
| 271.6328  | 2      | 10418.95   | C27H31F2N7O3 | (M+2H)+2    |                      |
| 540.25365 | 1      | 1591887.75 | C27H31F2N7O3 | (M+H)+      |                      |
| 541.25604 | 1      | 472964.91  | C27H31F2N7O3 | (M+H)+      |                      |
| 542.25858 | 1      | 77634.71   | C27H31F2N7O3 | (M+H)+      |                      |
| 270.63066 | 2      | 179367.64  | C27H31F2N7O3 | (M+2H)+2    | 2.06                 |
| 271.13199 | 2      | 57800.48   | C27H31F2N7O3 | (M+2H)+2    | 1.64                 |
| 271.6328  | 2      | 10418.95   | C27H31F2N7O3 | (M+2H)+2    | -0.35                |
| 540.25365 | 1      | 1591887.75 | C27H31F2N7O3 | (M+H)+      | 1.36                 |
| 540.25366 |        | 1593459.38 |              |             |                      |
| 541.25604 | 1      | 472964.91  | C27H31F2N7O3 | (M+H)+      | 0.43                 |
| 542.25858 | 1      | 77634.71   | C27H31F2N7O3 | (M+H)+      | 0.12                 |

--- End Of Report ---

# Compound 27

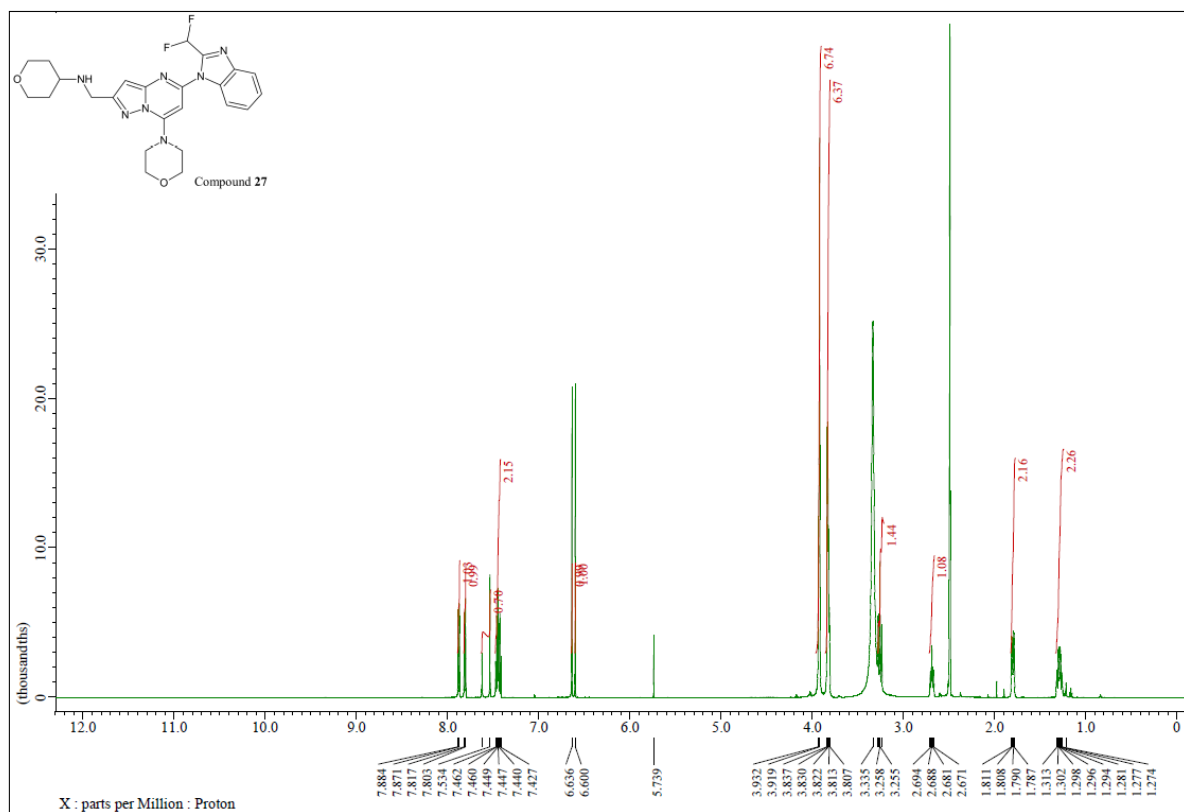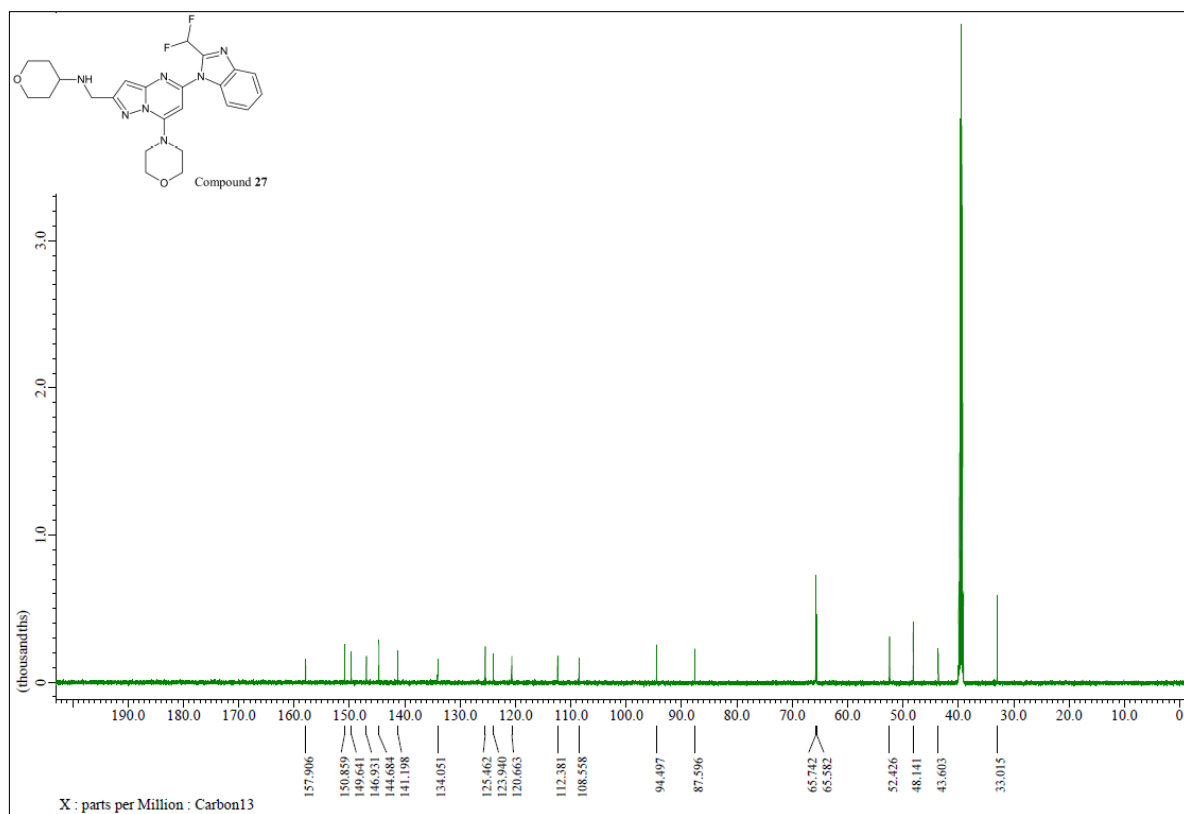

## Compound 27

| Name        | Obs. m/z | Obs. RT | Obs. Mass | Tgt Formula      | Tgt Mass | Tgt Mass Error | Find Cpds Algorith |
|-------------|----------|---------|-----------|------------------|----------|----------------|--------------------|
| Compound 27 | 484.2266 | 1.16    | 483.2193  | C24 H27 F2 N7 O2 | 483.2194 | -0.29          | Find by Formula    |

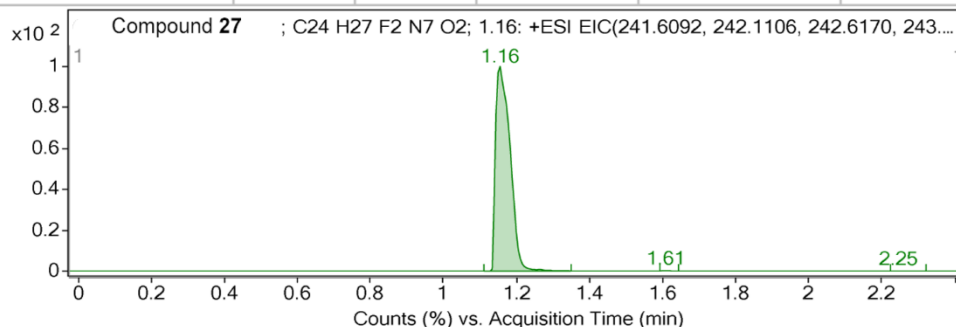

MS Zoomed Spectrum

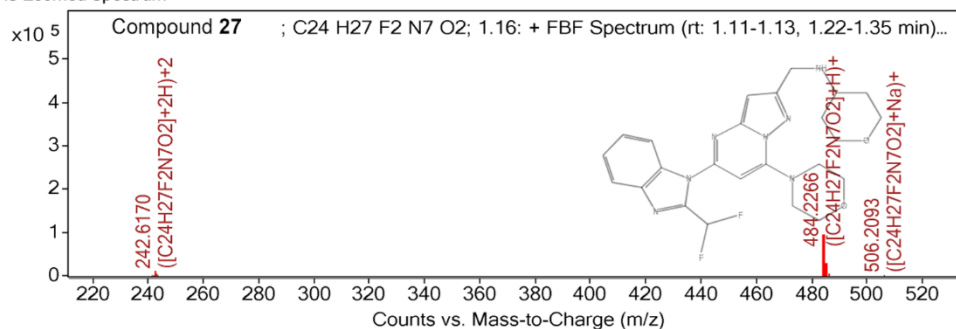

MS Zoomed Spectrum

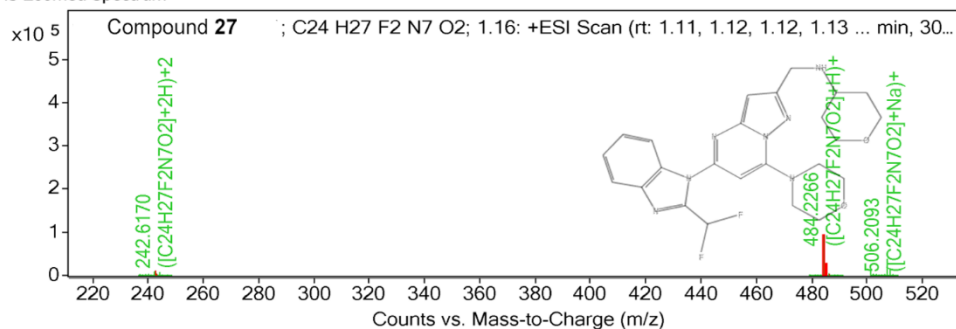

MS Spectrum Peak List

| Obs. m/z | Charge | Abund    | Formula      | Ion/Isotope | Tgt Mass Error (ppm) |
|----------|--------|----------|--------------|-------------|----------------------|
| 241.6093 | 2      | 641.2    | C24H27F2N7O2 | M+2         |                      |
| 242.1097 | 2      | 215.29   | C24H27F2N7O2 | M+2         |                      |
| 242.617  | 2      | 9418.48  | C24H27F2N7O2 | (M+2H)+2    |                      |
| 243.1191 | 2      | 3902.27  | C24H27F2N7O2 | (M+2H)+2    |                      |
| 243.6188 | 2      | 480.77   | C24H27F2N7O2 | (M+2H)+2    |                      |
| 484.2266 | 1      | 93398.47 | C24H27F2N7O2 | (M+H)+      |                      |
| 485.2292 | 1      | 26572.49 | C24H27F2N7O2 | (M+H)+      |                      |
| 486.2313 | 1      | 4498.85  | C24H27F2N7O2 | (M+H)+      |                      |
| 506.2093 | 1      | 299.24   | C24H27F2N7O2 | (M+Na)+     |                      |
| 241.6093 | 2      | 641.2    | C24H27F2N7O2 | M+2         | 0.56                 |
| 242.1097 | 2      | 215.29   | C24H27F2N7O2 | M+2         | -3.69                |
| 242.617  | 2      | 9418.48  | C24H27F2N7O2 | (M+2H)+2    | 0.19                 |
| 243.1191 | 2      | 3902.27  | C24H27F2N7O2 | (M+2H)+2    | 2.77                 |
| 243.6188 | 2      | 480.77   | C24H27F2N7O2 | (M+2H)+2    | -3.99                |
| 484.2266 | 1      | 93398.47 | C24H27F2N7O2 | (M+H)+      | -0.26                |
| 485.2292 | 1      | 26572.49 | C24H27F2N7O2 | (M+H)+      | -0.67                |
| 486.2313 | 1      | 4498.85  | C24H27F2N7O2 | (M+H)+      | -1.85                |
| 506.2093 | 1      | 299.24   | C24H27F2N7O2 | (M+Na)+     | 1.21                 |

--- End Of Report ---

# Compound 28

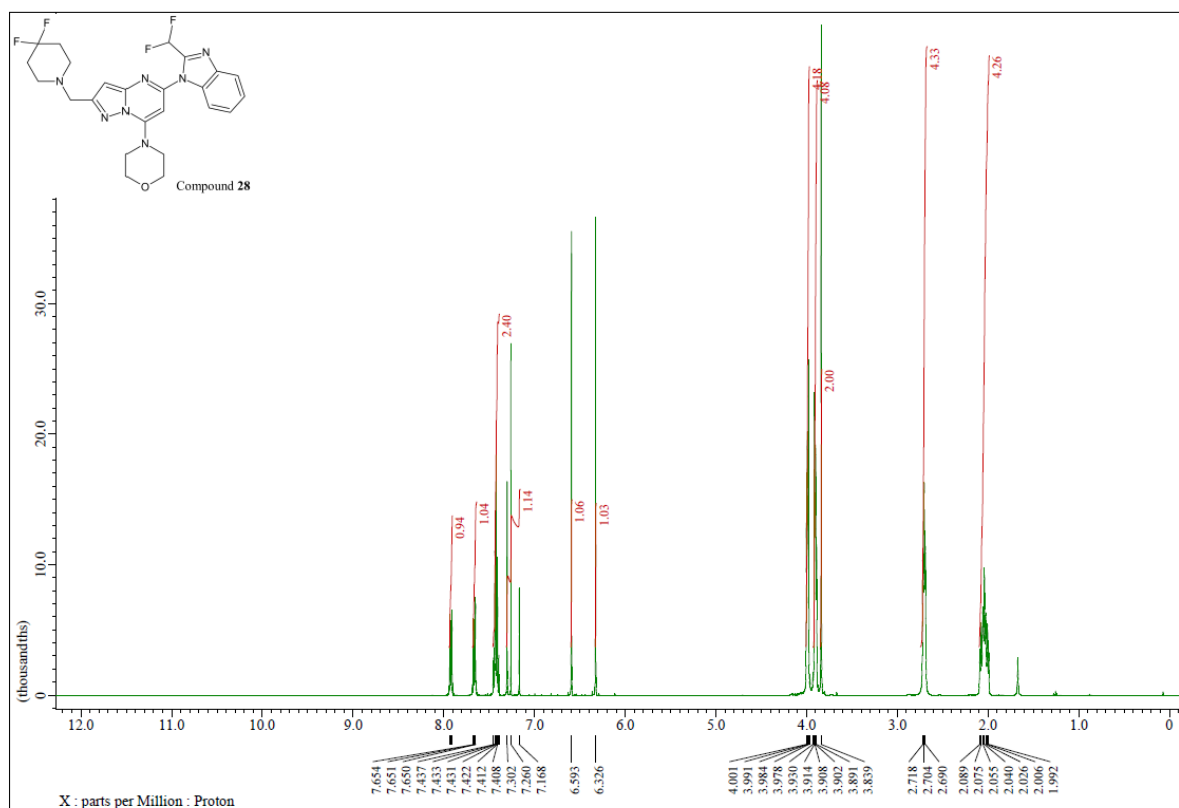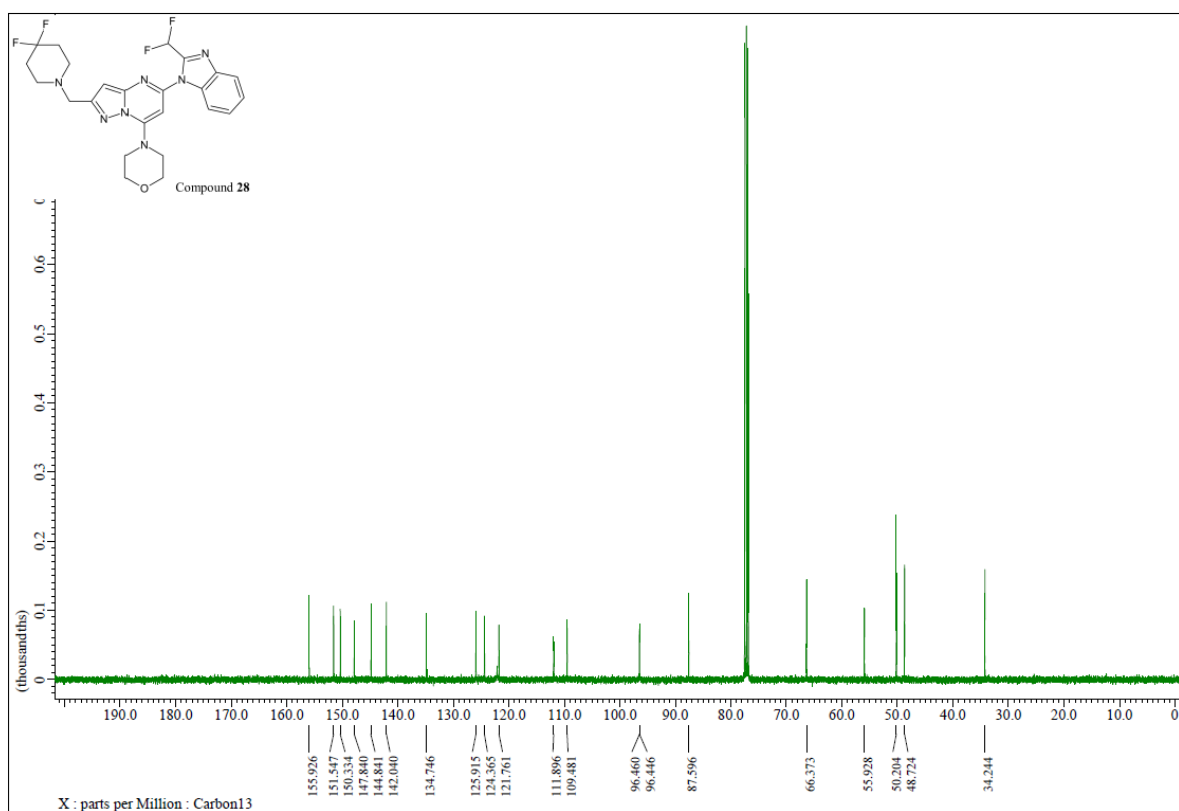

## Compound 28

| Compound Label | Name        | Algorithm           | Mass      |
|----------------|-------------|---------------------|-----------|
| Compound 28    | Compound 28 | Spectrum Extraction | 503.21022 |

MS Spectrum

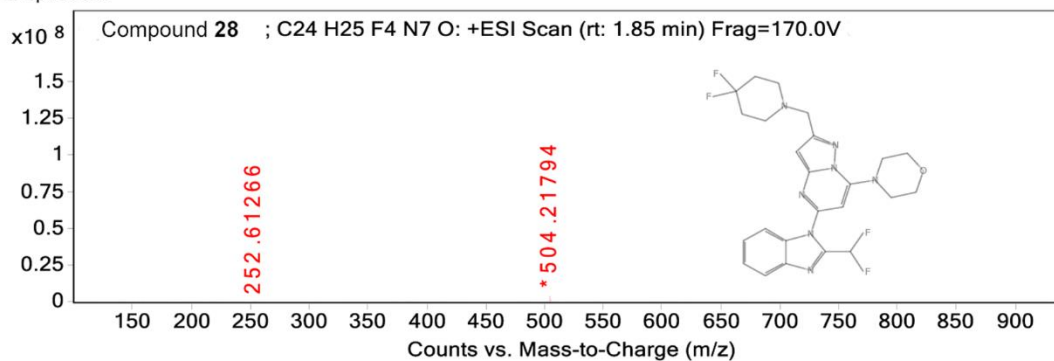

MS Zoomed Spectrum

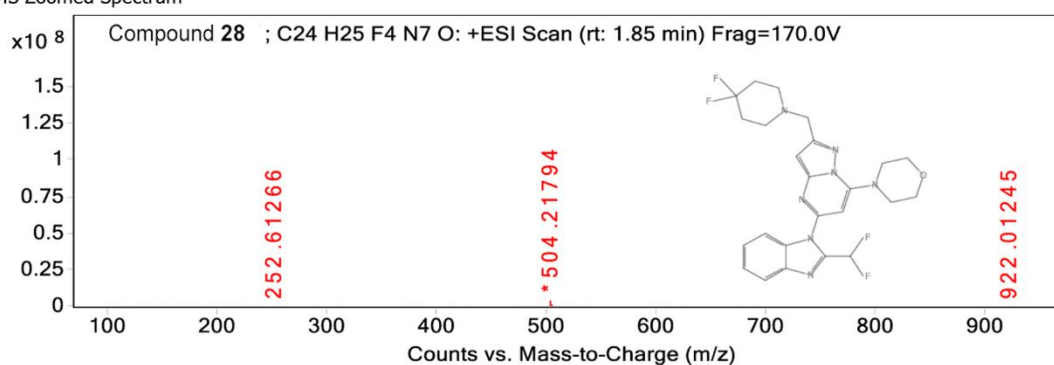

MS Spectrum Peak List

| m/z       | Calc m/z  | Diff(ppm) | z | Abund      | Formula                                                         | Ion                       |
|-----------|-----------|-----------|---|------------|-----------------------------------------------------------------|---------------------------|
| 121.05149 | 98.06004  | 234462.98 | 1 | 107715.05  | C <sub>5</sub> H <sub>8</sub> N O                               | (M+Na)+                   |
| 134.0781  | 116.04321 | 155415.3  | 1 | 30413.49   | C <sub>6</sub> H <sub>6</sub> F <sub>2</sub>                    | (M+NH <sub>4</sub> )+     |
| 242.60846 | 224.57262 | 80311.83  | 2 | 38307      | C <sub>24</sub> H <sub>18</sub> F <sub>3</sub> N <sub>5</sub> O | (M+2(NH <sub>4</sub> ))+2 |
| 252.61266 |           |           | 2 | 275026.94  |                                                                 |                           |
| 253.11332 |           |           | 2 | 88366.99   |                                                                 |                           |
| 502.19922 | 484.16292 | 37252.54  | 1 | 59938.18   | C <sub>24</sub> H <sub>20</sub> F <sub>4</sub> N <sub>6</sub> O | (M+NH <sub>4</sub> )+     |
| 504.21794 | 504.21295 | 9.9       | 1 | 3615947.75 |                                                                 |                           |
| 505.21907 | 505.21577 | 6.53      | 1 | 1067767.5  |                                                                 |                           |
| 506.22162 | 506.21851 | 6.15      | 1 | 148034.56  |                                                                 |                           |
| 922.01245 |           |           | 1 | 133568.02  |                                                                 |                           |



# Compound 29

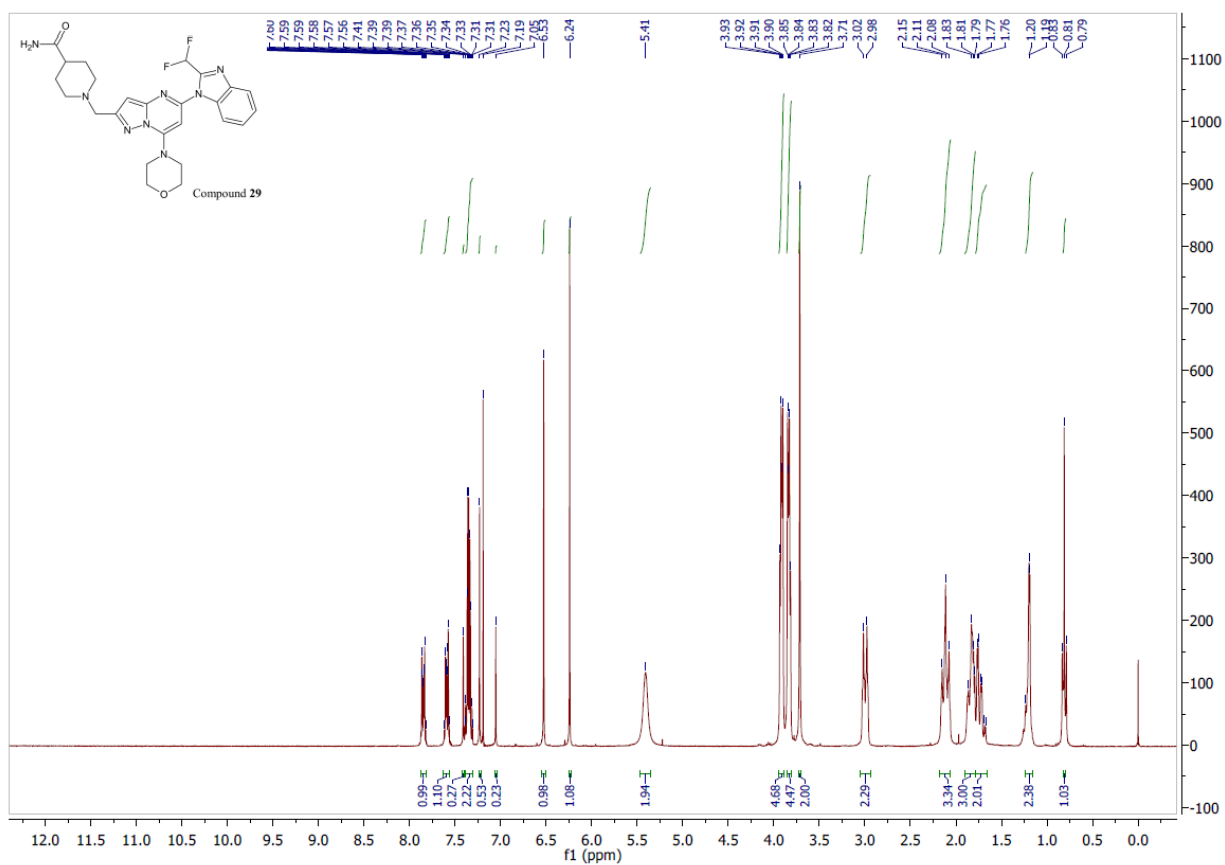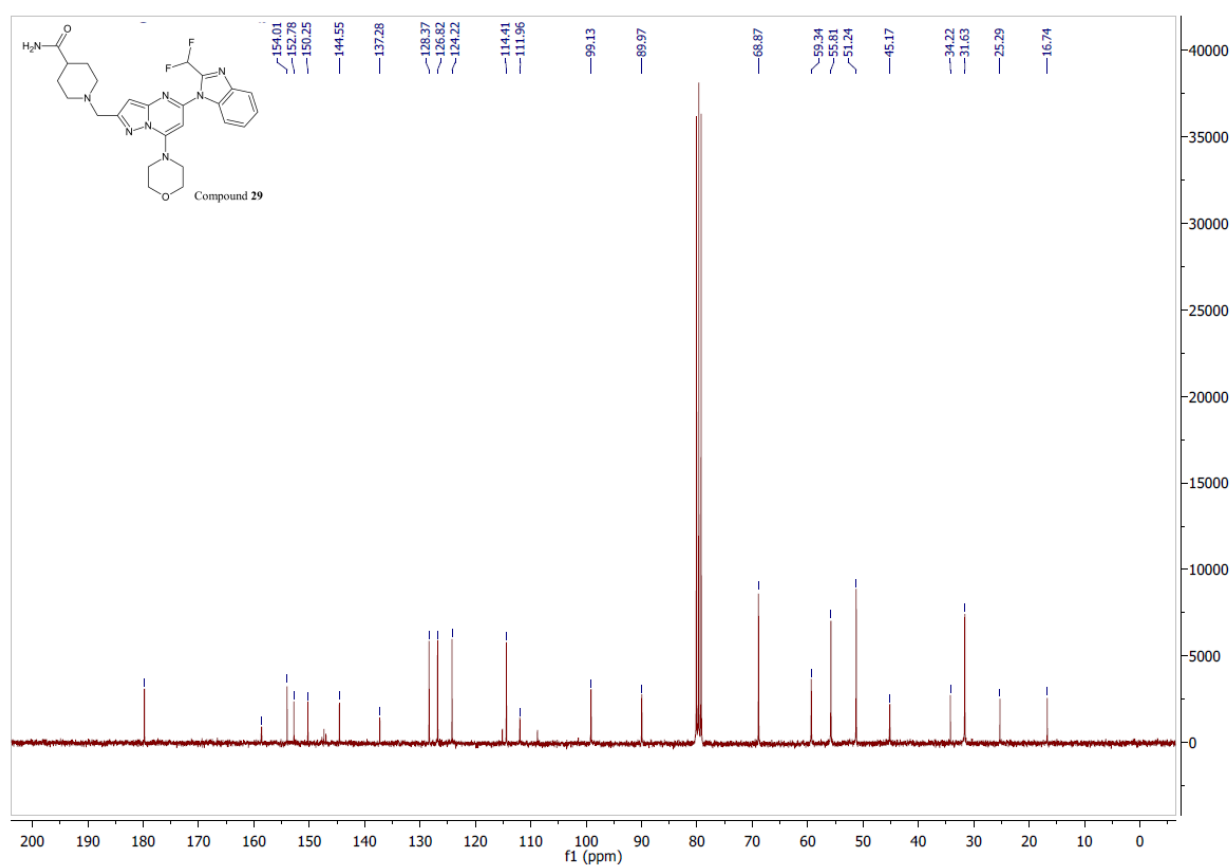

## Compound 29

| Compound Label | Name        | Algorithm           | Mass     |
|----------------|-------------|---------------------|----------|
| Compound 29    | Compound 29 | Spectrum Extraction | 510.2333 |

MS Spectrum

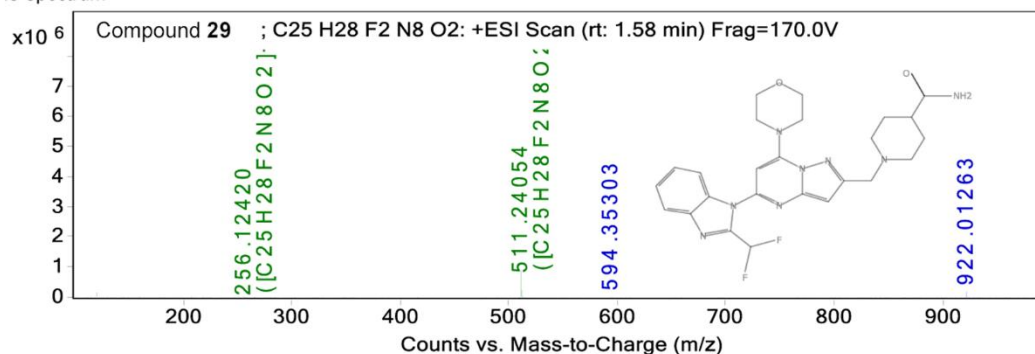

MS Zoomed Spectrum

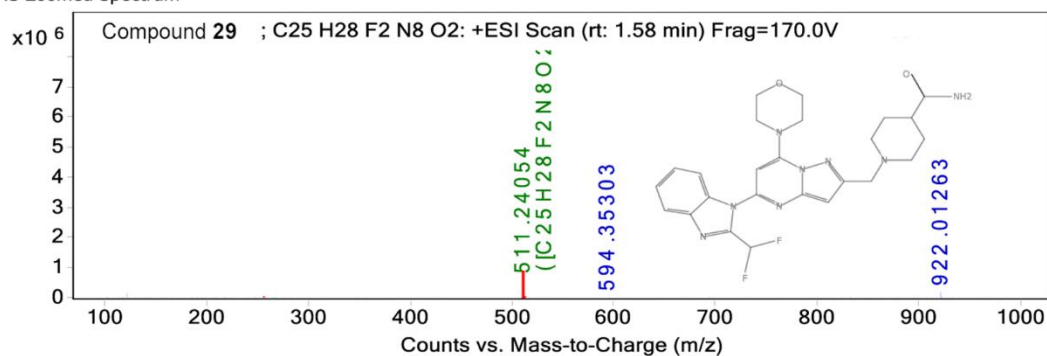

MS Spectrum Peak List

| m/z       | Calc m/z  | Diff(ppm) | z | Abund     | Formula                                                                      | Ion                   |
|-----------|-----------|-----------|---|-----------|------------------------------------------------------------------------------|-----------------------|
| 119.02898 | 96.03812  | 239392.99 | 1 | 15371.62  | C <sub>3</sub> H <sub>6</sub> F <sub>2</sub> O                               | (M+Na)+               |
| 121.05147 | 98.06004  | 234462.74 | 1 | 142227.73 | C <sub>5</sub> H <sub>8</sub> N <sub>2</sub> O                               | (M+Na)+               |
| 158.97415 |           |           |   | 13291.27  |                                                                              |                       |
| 194.11845 | 176.08318 | 102424.71 | 1 | 12525.6   | C <sub>11</sub> H <sub>12</sub> O <sub>2</sub>                               | (M+NH <sub>4</sub> )+ |
| 256.1242  | 255.11462 | 3957.39   | 2 | 25005.71  | C <sub>25</sub> H <sub>28</sub> F <sub>2</sub> N <sub>8</sub> O <sub>2</sub> | (M+2H)+2              |
| 511.24054 | 510.22978 | 1981      | 1 | 895150.94 | C <sub>25</sub> H <sub>28</sub> F <sub>2</sub> N <sub>8</sub> O <sub>2</sub> | (M+H)+                |
| 512.24361 | 512.24039 | 6.28      | 1 | 231365.09 | C <sub>25</sub> H <sub>28</sub> F <sub>2</sub> N <sub>8</sub> O <sub>2</sub> | (M+H)+                |
| 513.2455  | 513.24303 | 4.81      | 1 | 34448.2   | C <sub>25</sub> H <sub>28</sub> F <sub>2</sub> N <sub>8</sub> O <sub>2</sub> | (M+H)+                |
| 922.01263 |           |           | 1 | 180393.22 |                                                                              |                       |
| 923.01411 |           |           | 1 | 30642.4   |                                                                              |                       |

# Compound 30

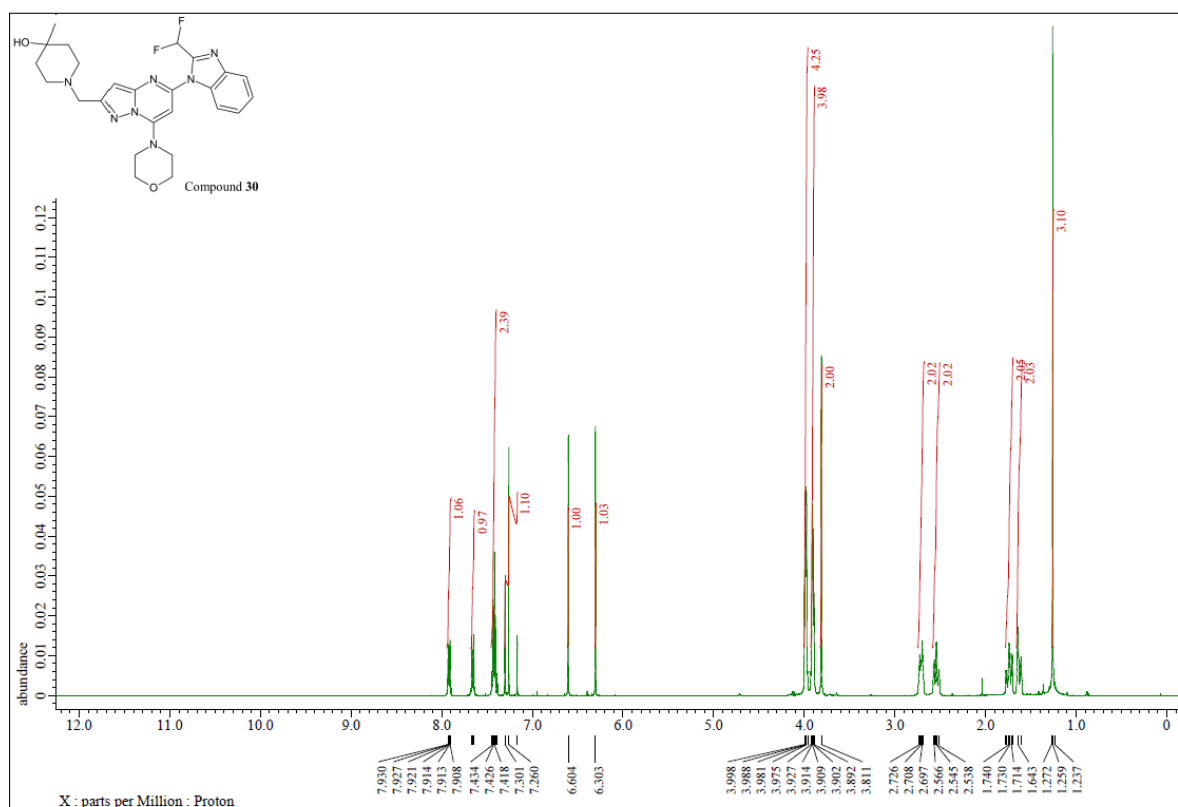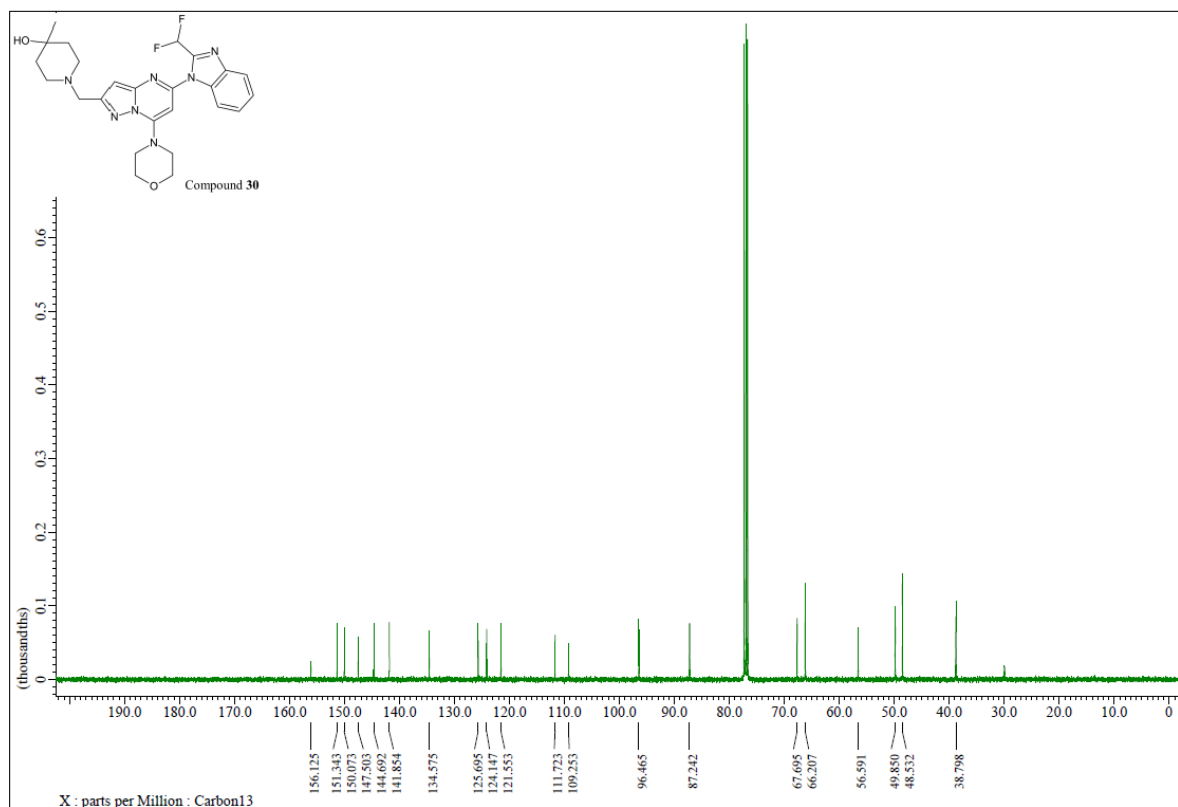

# Compound 30

| Name        | Obs. m/z  | Obs. RT | Obs. Mass | Tgt Formula      | Tgt Mass  | Tgt Mass Error | Find Cpds Algorit |
|-------------|-----------|---------|-----------|------------------|-----------|----------------|-------------------|
| Compound 30 | 498.24225 | 1.23    | 497.23508 | C25 H29 F2 N7 O2 | 497.23508 | -0.01          | Find by Formula   |

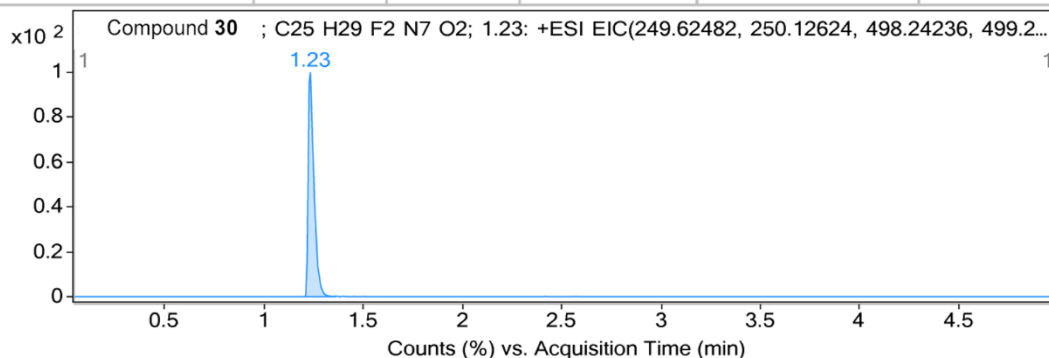

MS Zoomed Spectrum

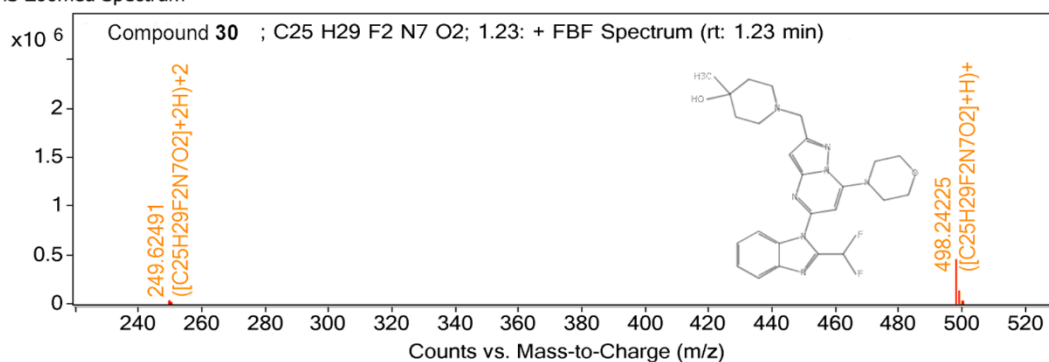

MS Zoomed Spectrum

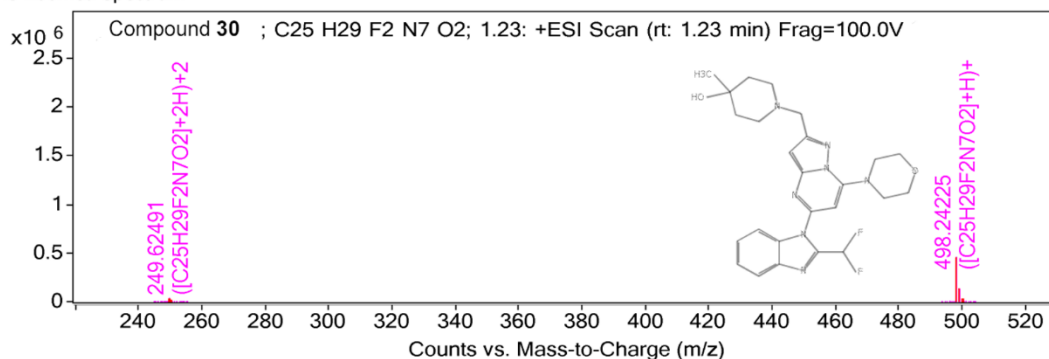

MS Spectrum Peak List

| Obs. m/z  | Charge | Abund     | Formula      | Ion/Isotope | Tgt Mass Error (ppm) |
|-----------|--------|-----------|--------------|-------------|----------------------|
| 249.62491 | 2      | 32408.56  | C25H29F2N7O2 | (M+2H)+2    |                      |
| 250.12641 | 2      | 9351.96   | C25H29F2N7O2 | (M+2H)+2    |                      |
| 250.63006 | 2      | 1067.82   | C25H29F2N7O2 | (M+2H)+2    |                      |
| 498.24225 | 1      | 454326    | C25H29F2N7O2 | (M+H)+      |                      |
| 499.24548 | 1      | 127977.54 | C25H29F2N7O2 | (M+H)+      |                      |
| 500.24771 | 1      | 17402.12  | C25H29F2N7O2 | (M+H)+      |                      |
| 249.62491 | 2      | 32408.56  | C25H29F2N7O2 | (M+2H)+2    | 0.36                 |
| 250.12641 | 2      | 9351.96   | C25H29F2N7O2 | (M+2H)+2    | 0.67                 |
| 250.63006 | 2      | 1067.82   | C25H29F2N7O2 | (M+2H)+2    | 9.85                 |
| 498.24225 | 1      | 454326    | C25H29F2N7O2 | (M+H)+      | -0.21                |
| 499.24548 | 1      | 127977.54 | C25H29F2N7O2 | (M+H)+      | 0.55                 |
| 500.24771 | 1      | 17402.12  | C25H29F2N7O2 | (M+H)+      | -0.41                |

--- End Of Report ---

# Compound 31

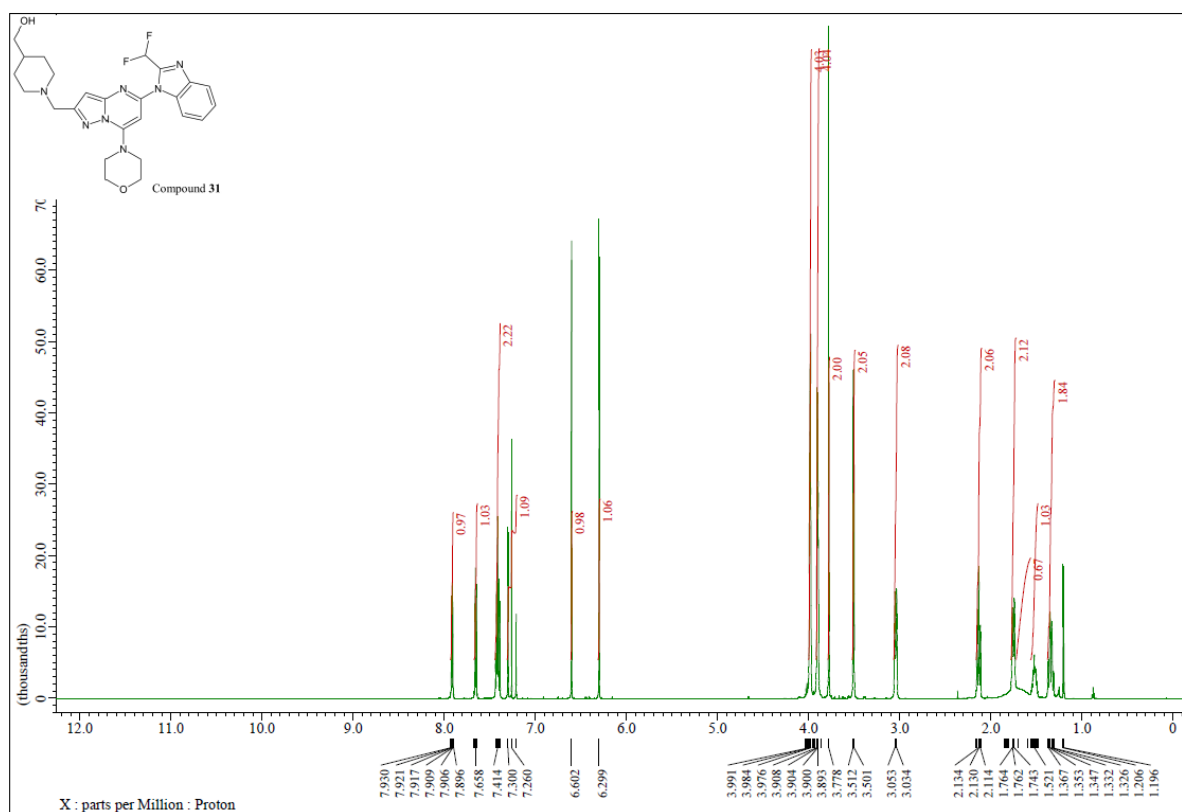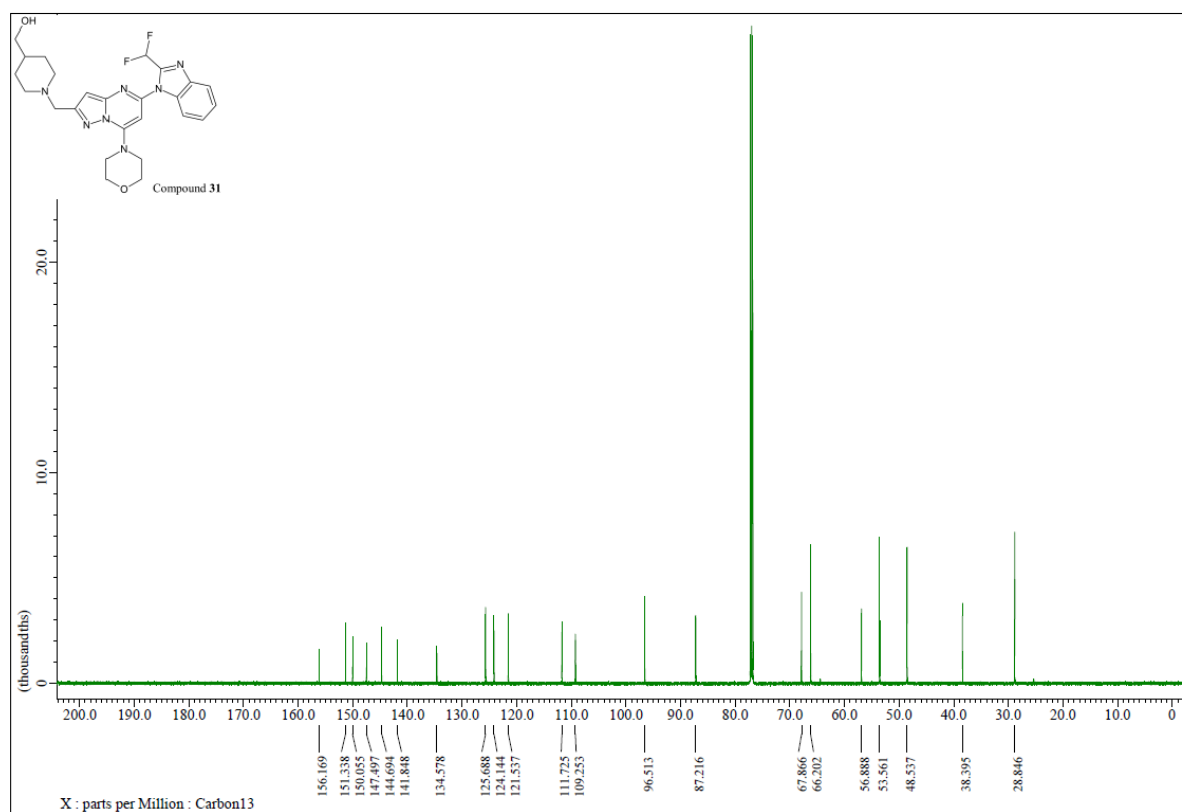

## Compound 31

| Name        | Obs. m/z  | Obs. RT | Obs. Mass | Tgt Formula      | Tgt Mass  | Tgt Mass Error | Find Cpbs Algorit |
|-------------|-----------|---------|-----------|------------------|-----------|----------------|-------------------|
| Compound 31 | 249.62509 | 1.21    | 497.23538 | C25 H29 F2 N7 O2 | 497.23508 | 0.6            | Find by Formula   |

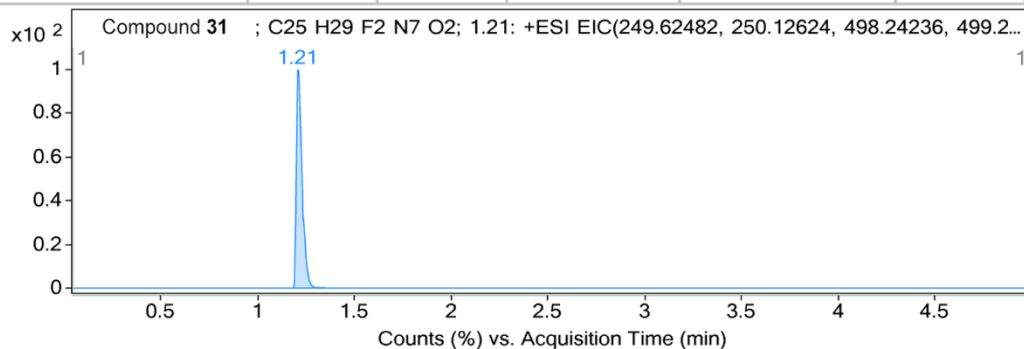

MS Zoomed Spectrum

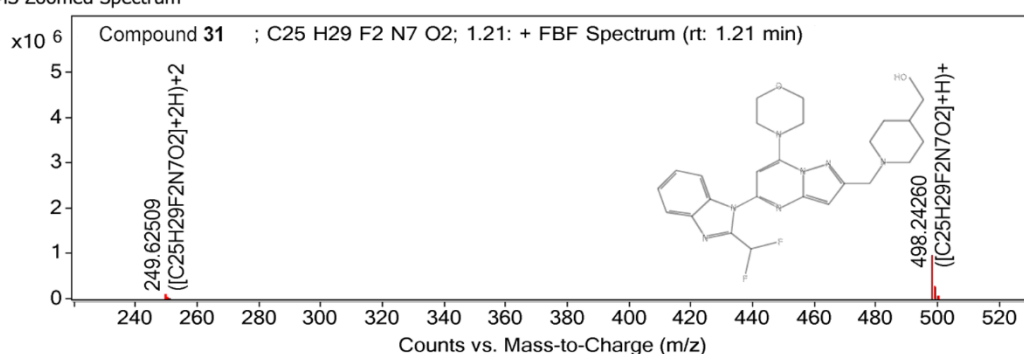

MS Zoomed Spectrum

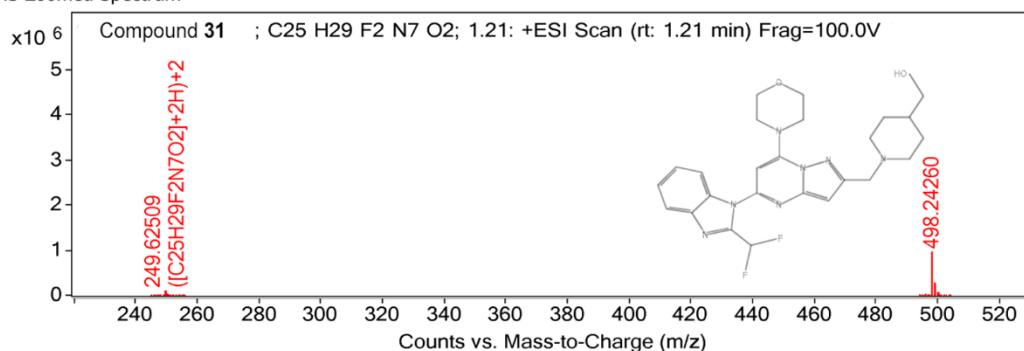

MS Spectrum Peak List

| Obs. m/z  | Charge | Abund     | Formula      | Ion/Isotope | Tgt Mass Error (ppm) |
|-----------|--------|-----------|--------------|-------------|----------------------|
| 249.62509 | 2      | 93481.14  | C25H29F2N7O2 | (M+2H)+2    |                      |
| 250.12632 | 2      | 26983.34  | C25H29F2N7O2 | (M+2H)+2    |                      |
| 250.62759 | 2      | 4998.15   | C25H29F2N7O2 | (M+2H)+2    |                      |
| 251.12641 | 2      | 537.79    | C25H29F2N7O2 | (M+2H)+2    |                      |
| 498.2426  | 1      | 954572.56 | C25H29F2N7O2 | (M+H)+      |                      |
| 499.24579 | 1      | 250903.33 | C25H29F2N7O2 | (M+H)+      |                      |
| 500.24755 | 1      | 41231.06  | C25H29F2N7O2 | (M+H)+      |                      |
| 249.62509 | 2      | 93481.14  | C25H29F2N7O2 | (M+2H)+2    | 1.11                 |
| 250.12632 | 2      | 26983.34  | C25H29F2N7O2 | (M+2H)+2    | 0.32                 |
| 250.62759 | 2      | 4998.15   | C25H29F2N7O2 | (M+2H)+2    | -0.03                |
| 251.12641 | 2      | 537.79    | C25H29F2N7O2 | (M+2H)+2    | -9.93                |
| 498.2426  |        | 955096.81 |              |             | 0.48                 |
| 498.2426  | 1      | 954572.56 | C25H29F2N7O2 | (M+H)+      | 0.48                 |
| 499.24579 | 1      | 250903.33 | C25H29F2N7O2 | (M+H)+      | 1.16                 |
| 500.24755 | 1      | 41231.06  | C25H29F2N7O2 | (M+H)+      | -0.72                |

--- End Of Report ---

# Compound 32

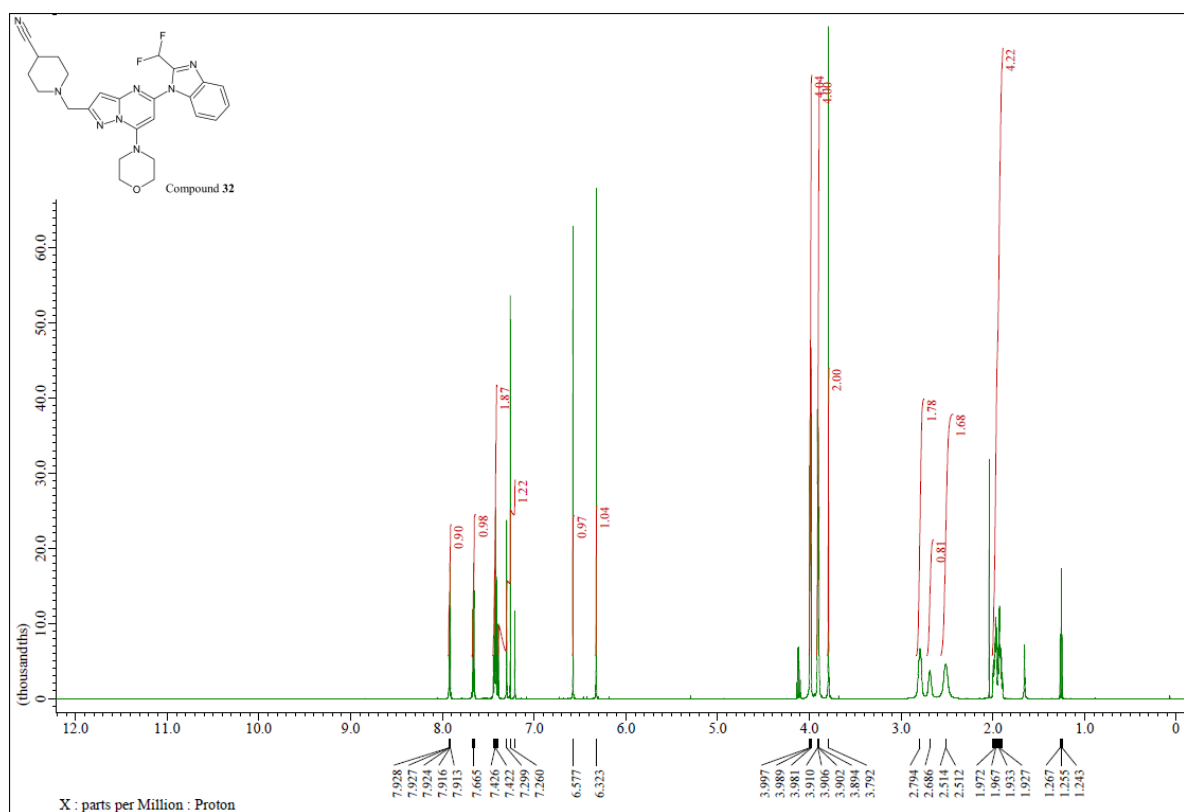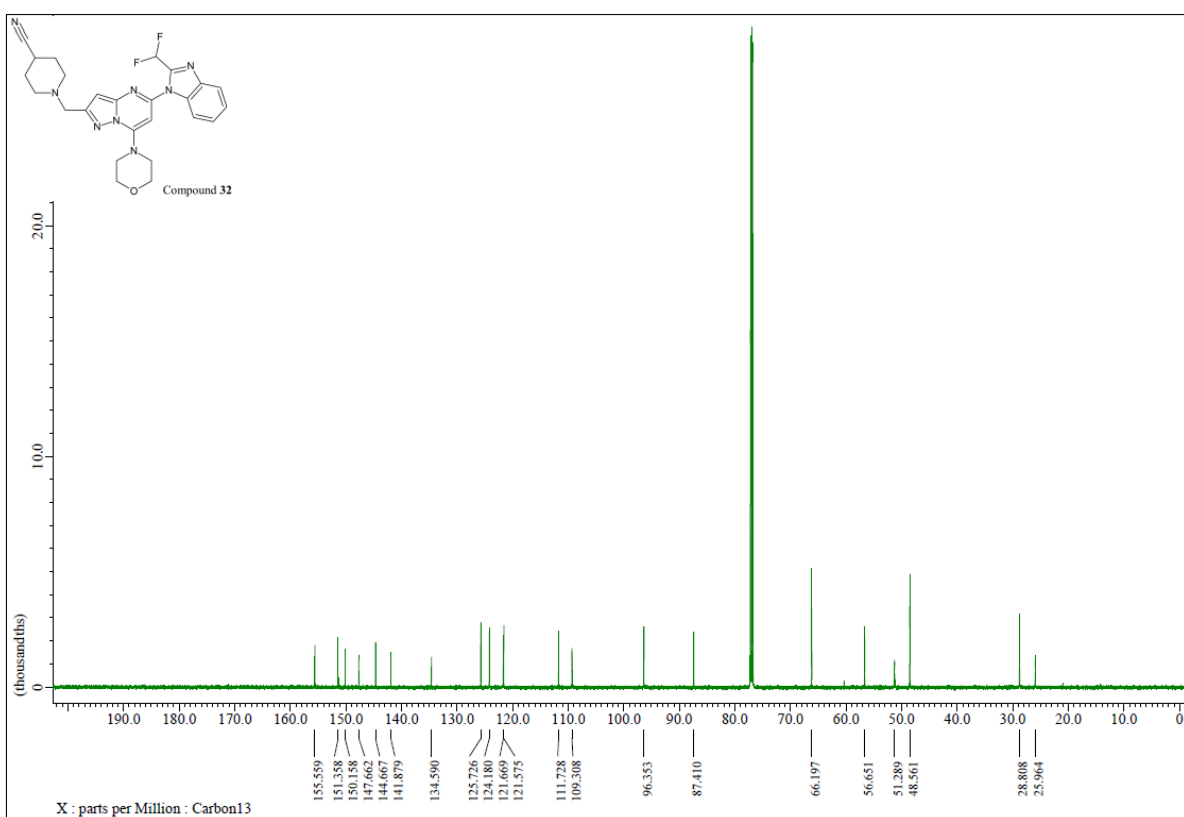

## Compound 32

| Name        | Obs. m/z  | Obs. RT | Obs. Mass | Tgt Formula     | Tgt Mass  | Tgt Mass Error | Find Cpds Algorit |
|-------------|-----------|---------|-----------|-----------------|-----------|----------------|-------------------|
| Compound 32 | 247.11734 | 1.28    | 492.22059 | C25 H26 F2 N8 O | 492.21976 | 1.67           | Find by Formula   |

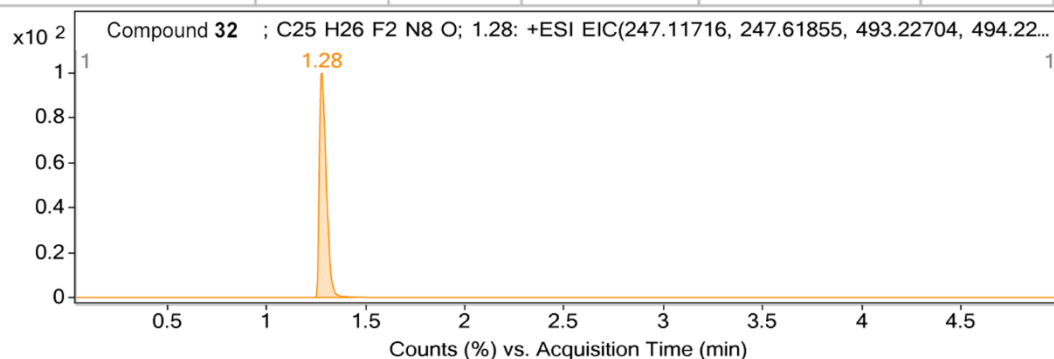

MS Zoomed Spectrum

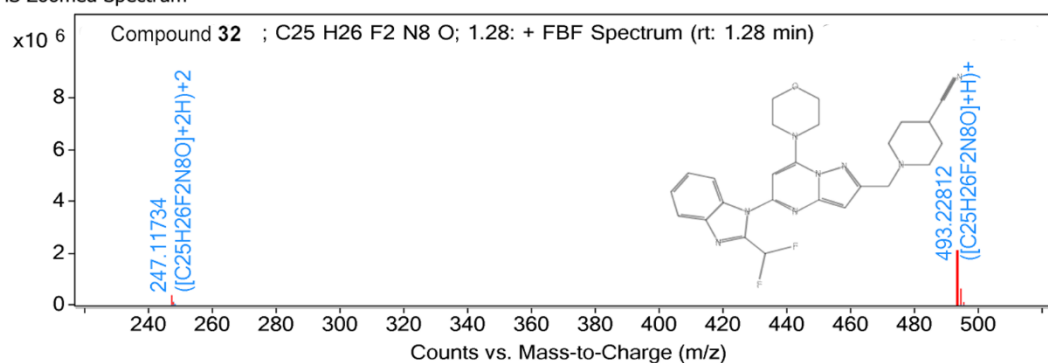

MS Zoomed Spectrum

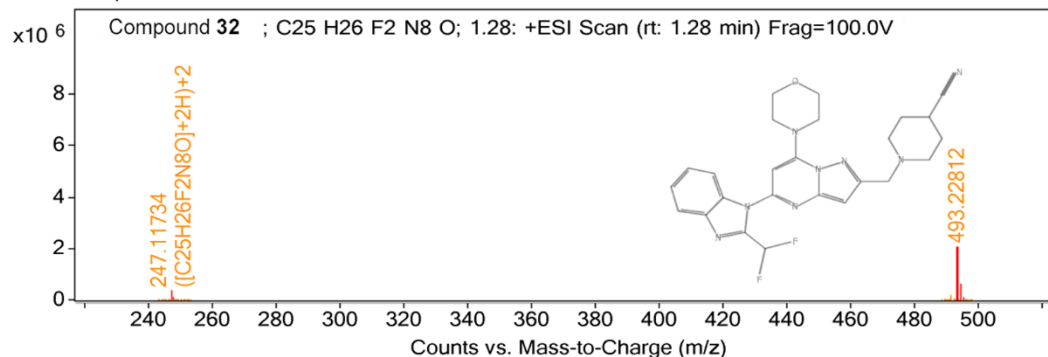

MS Spectrum Peak List

| Obs. m/z  | Charge | Abund      | Formula     | Ion/Isotope | Tgt Mass Error (ppm) |
|-----------|--------|------------|-------------|-------------|----------------------|
| 247.11734 | 2      | 344030.63  | C25H26F2N8O | (M+2H)+2    |                      |
| 247.61913 | 2      | 93506.33   | C25H26F2N8O | (M+2H)+2    |                      |
| 248.11993 | 2      | 15524.01   | C25H26F2N8O | (M+2H)+2    |                      |
| 493.22812 | 1      | 2066621    | C25H26F2N8O | (M+H)+      |                      |
| 494.23008 | 1      | 564287.69  | C25H26F2N8O | (M+H)+      |                      |
| 495.23248 | 1      | 79639.52   | C25H26F2N8O | (M+H)+      |                      |
| 247.11734 | 2      | 344030.63  | C25H26F2N8O | (M+2H)+2    | 0.72                 |
| 247.61913 | 2      | 93506.33   | C25H26F2N8O | (M+2H)+2    | 2.36                 |
| 248.11993 | 2      | 15524.01   | C25H26F2N8O | (M+2H)+2    | 0.14                 |
| 493.22812 | 1      | 2066621    | C25H26F2N8O | (M+H)+      | 2.18                 |
| 493.22812 |        | 2068672.75 |             |             |                      |
| 494.23008 | 1      | 564287.69  | C25H26F2N8O | (M+H)+      | 0.52                 |
| 495.23248 | 1      | 79639.52   | C25H26F2N8O | (M+H)+      | -0.06                |

--- End Of Report ---



# Compound 33

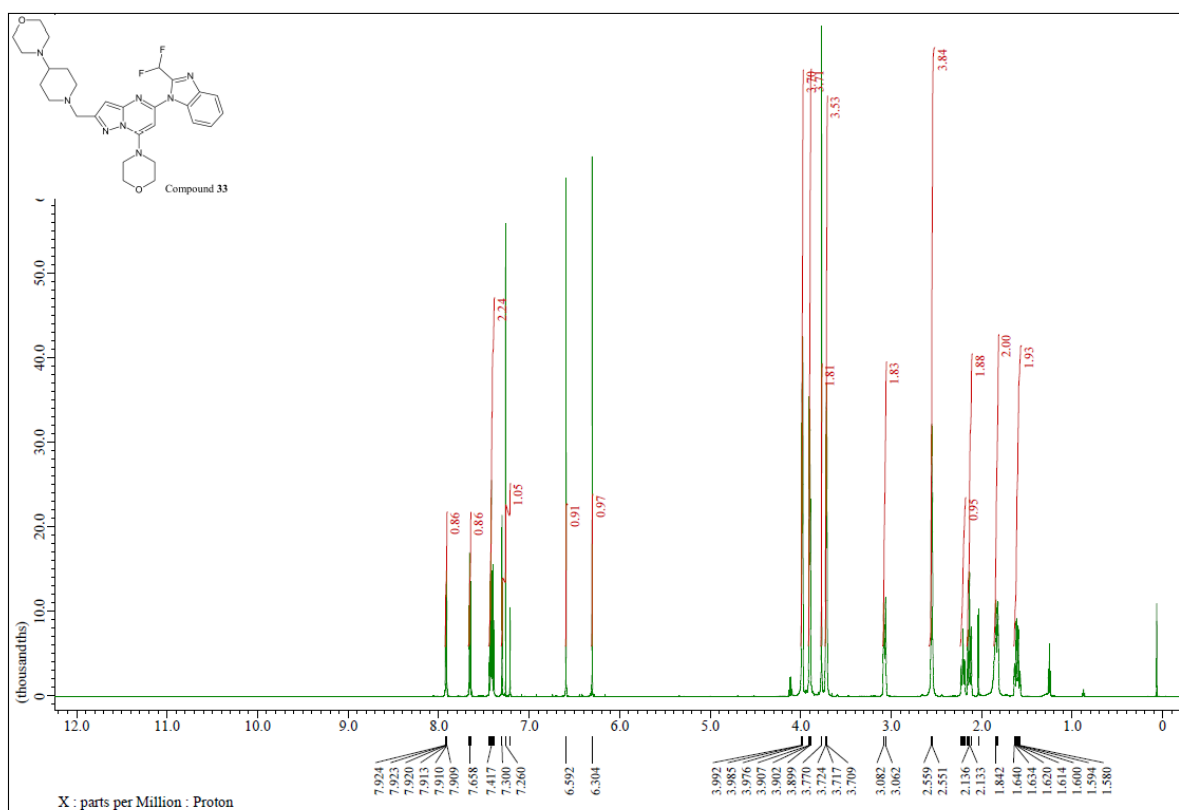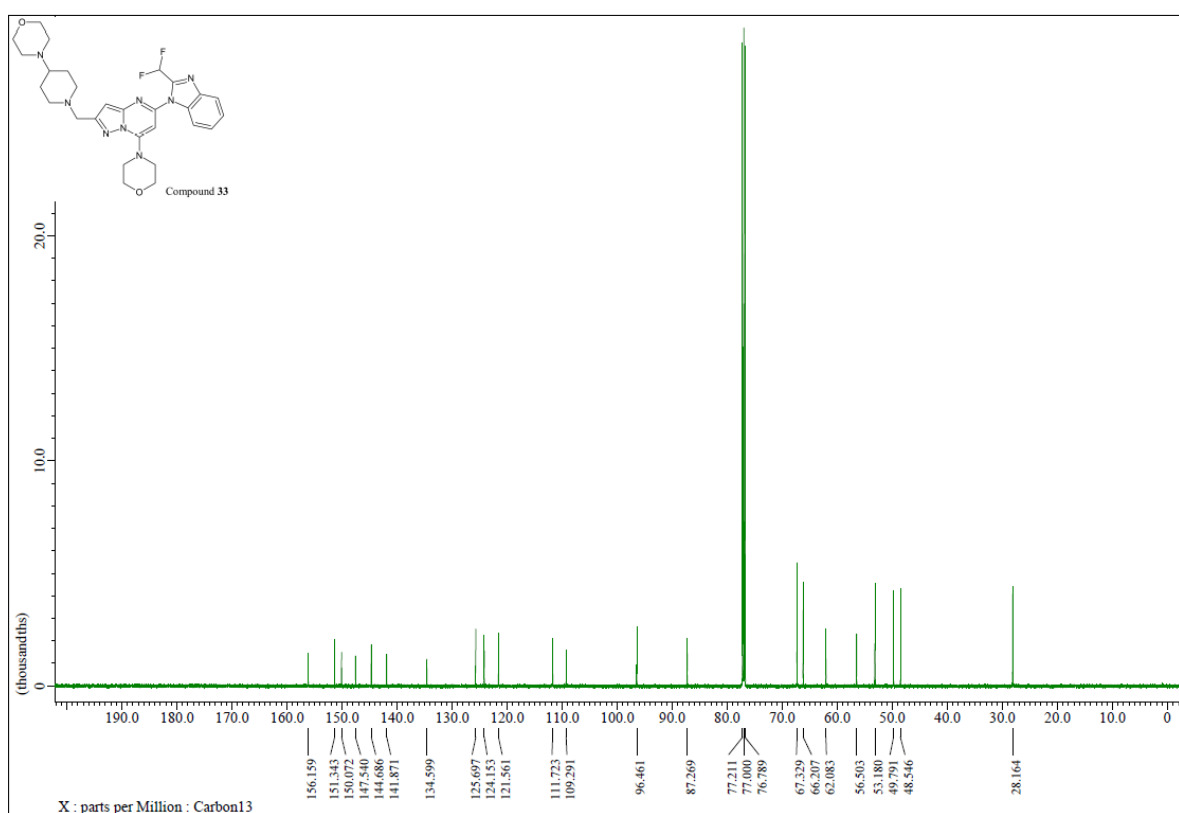

# Compound 33

| Name        | Obs. m/z  | Obs. RT | Obs. Mass | Tgt Formula      | Tgt Mass  | Tgt Mass Error | Find Cpds Algorit |
|-------------|-----------|---------|-----------|------------------|-----------|----------------|-------------------|
| Compound 33 | 553.28461 | 0.96    | 552.27741 | C28 H34 F2 N8 O2 | 552.27728 | 0.24           | Find by Formula   |

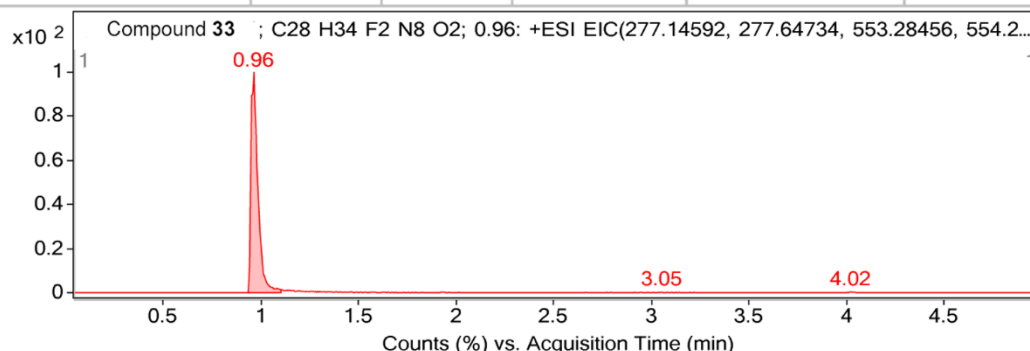

MS Zoomed Spectrum

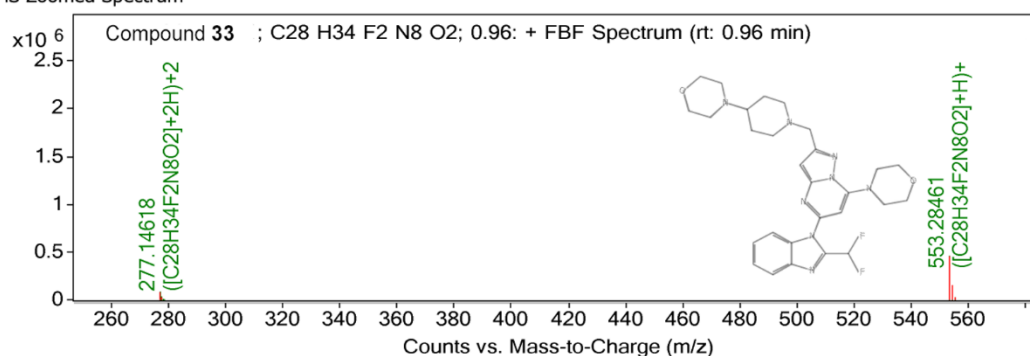

MS Zoomed Spectrum

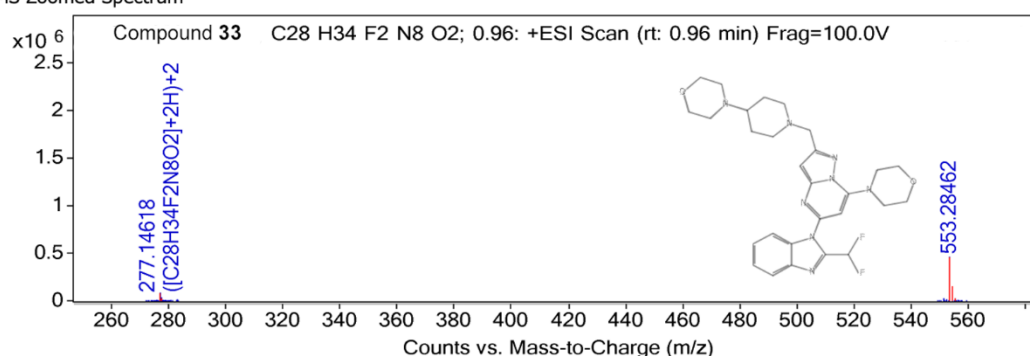

MS Spectrum Peak List

| Obs. m/z  | Charge | Abund     | Formula      | Ion/Isotope | Tgt Mass Error (ppm) |
|-----------|--------|-----------|--------------|-------------|----------------------|
| 277.14618 | 2      | 79318.7   | C28H34F2N8O2 | (M+2H)+2    |                      |
| 277.64732 | 2      | 29703.31  | C28H34F2N8O2 | (M+2H)+2    |                      |
| 278.14977 | 2      | 5296.34   | C28H34F2N8O2 | (M+2H)+2    |                      |
| 278.65038 | 2      | 521.16    | C28H34F2N8O2 | (M+2H)+2    |                      |
| 553.28461 | 1      | 456124.09 | C28H34F2N8O2 | (M+H)+      |                      |
| 554.28756 | 1      | 135750.58 | C28H34F2N8O2 | (M+H)+      |                      |
| 555.28985 | 1      | 23141.17  | C28H34F2N8O2 | (M+H)+      |                      |
| 277.14618 | 2      | 79318.7   | C28H34F2N8O2 | (M+2H)+2    | 0.96                 |
| 277.64732 | 2      | 29703.31  | C28H34F2N8O2 | (M+2H)+2    | -0.06                |
| 278.14977 | 2      | 5296.34   | C28H34F2N8O2 | (M+2H)+2    | 3.85                 |
| 278.65038 | 2      | 521.16    | C28H34F2N8O2 | (M+2H)+2    | 1.29                 |
| 553.28461 | 1      | 456124.09 | C28H34F2N8O2 | (M+H)+      | 0.11                 |
| 553.28462 |        | 458500.22 |              |             |                      |
| 554.28756 | 1      | 135750.58 | C28H34F2N8O2 | (M+H)+      | 0.29                 |
| 555.28985 | 1      | 23141.17  | C28H34F2N8O2 | (M+H)+      | -0.5                 |

--- End Of Report ---

# Compound 34

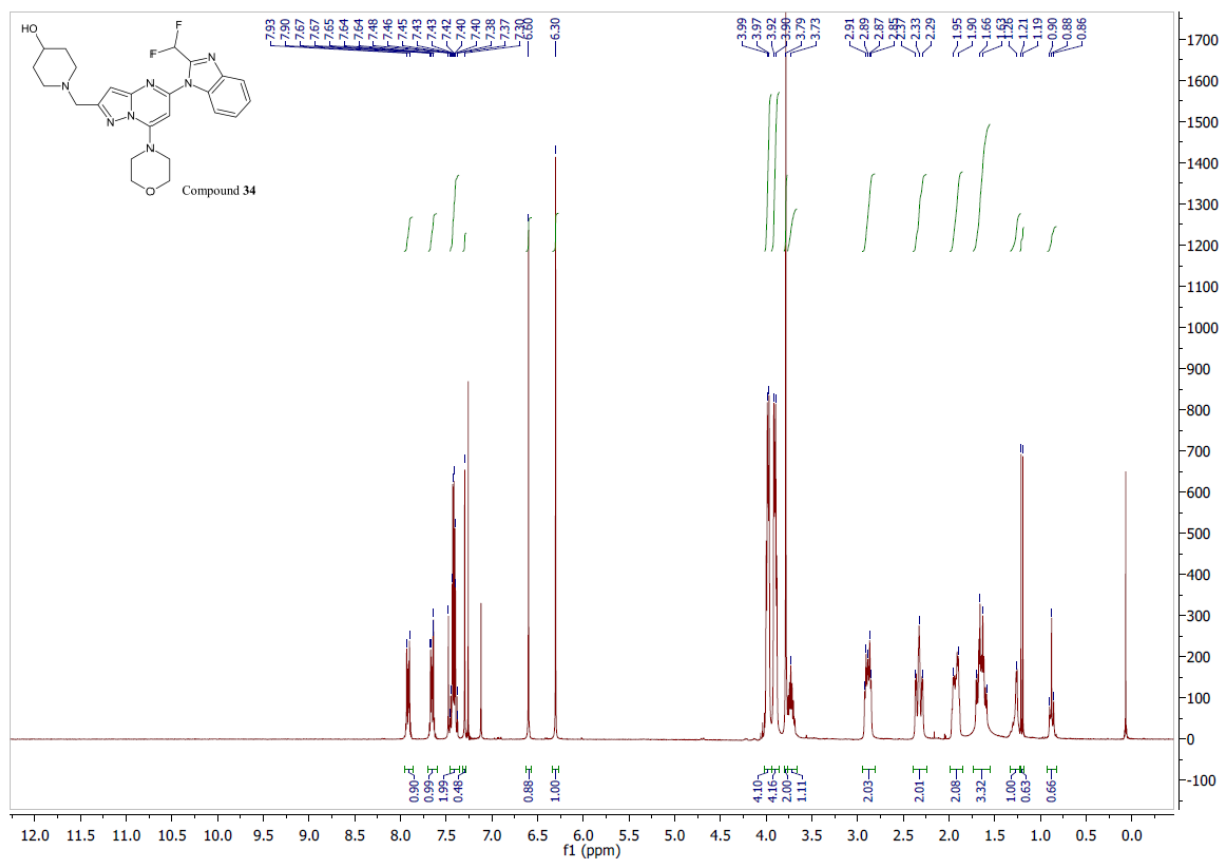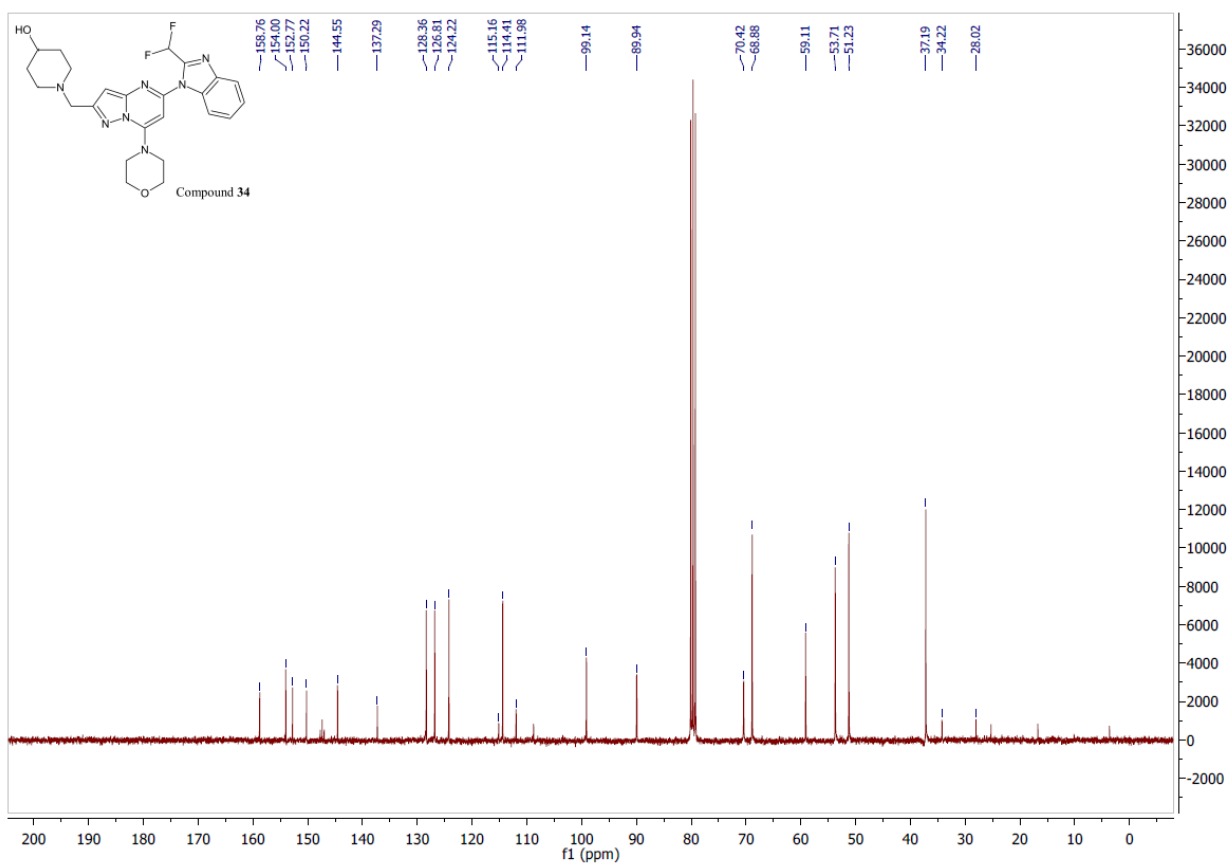

# Compound 34

| Name        | Obs. m/z  | Obs. RT | Obs. Mass | Tgt Formula      | Tgt Mass  | Tgt Mass Error | Find Cpd<br>Alaorit |
|-------------|-----------|---------|-----------|------------------|-----------|----------------|---------------------|
| Compound 34 | 242.61746 | 1.19    | 483.21994 | C24 H27 F2 N7 O2 | 483.21943 | 1.06           | Find by<br>Formula  |

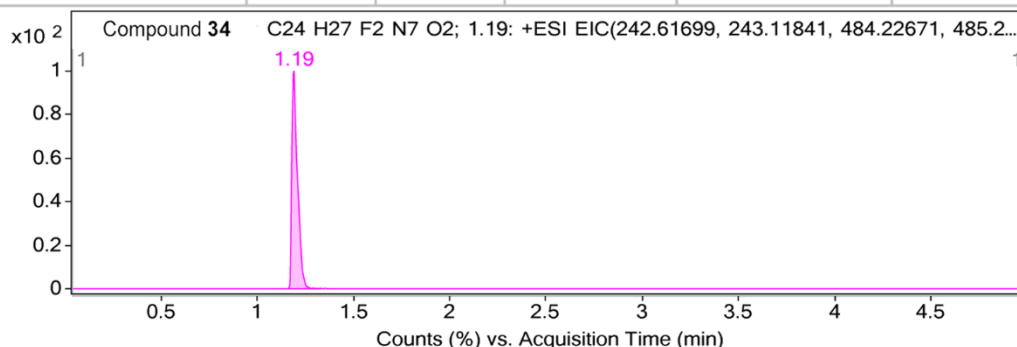

MS Zoomed Spectrum

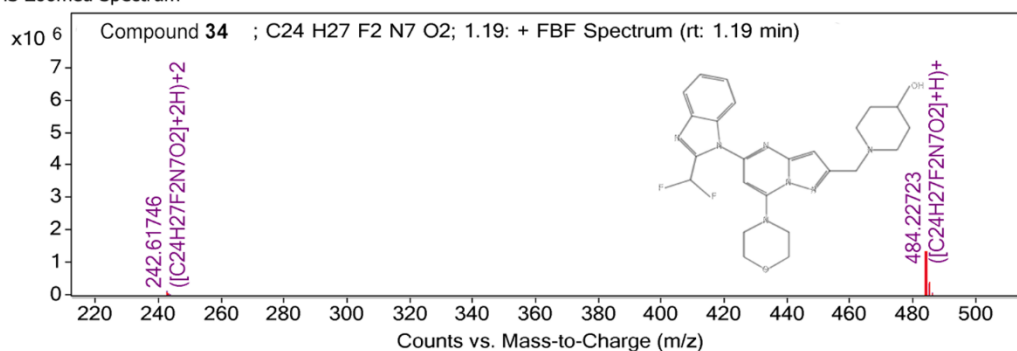

MS Zoomed Spectrum

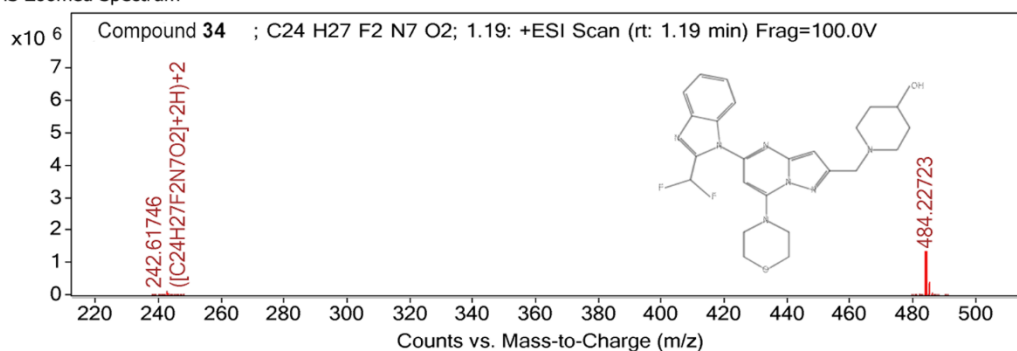

MS Spectrum Peak List

| Obs. m/z  | Charge | Abund      | Formula      | Ion/Isotope | Tgt Mass Error (ppm) |
|-----------|--------|------------|--------------|-------------|----------------------|
| 242.61746 | 2      | 100150.59  | C24H27F2N7O2 | (M+2H)+2    |                      |
| 243.1188  | 2      | 28050.54   | C24H27F2N7O2 | (M+2H)+2    |                      |
| 243.62017 | 2      | 4474.7     | C24H27F2N7O2 | (M+2H)+2    |                      |
| 484.22723 | 1      | 1327642.88 | C24H27F2N7O2 | (M+H)+      |                      |
| 485.22988 | 1      | 339432.13  | C24H27F2N7O2 | (M+H)+      |                      |
| 486.23245 | 1      | 46026.59   | C24H27F2N7O2 | (M+H)+      |                      |
| 242.61746 | 2      | 100150.59  | C24H27F2N7O2 | (M+2H)+2    | 1.93                 |
| 243.1188  | 2      | 28050.54   | C24H27F2N7O2 | (M+2H)+2    | 1.6                  |
| 243.62017 | 2      | 4474.7     | C24H27F2N7O2 | (M+2H)+2    | 1.74                 |
| 484.22723 | 1      | 1327642.88 | C24H27F2N7O2 | (M+H)+      | 1.09                 |
| 484.22723 |        | 1328394.5  |              |             |                      |
| 485.22988 | 1      | 339432.13  | C24H27F2N7O2 | (M+H)+      | 0.7                  |
| 486.23245 | 1      | 46026.59   | C24H27F2N7O2 | (M+H)+      | 0.48                 |

--- End Of Report ---

# Compound 35

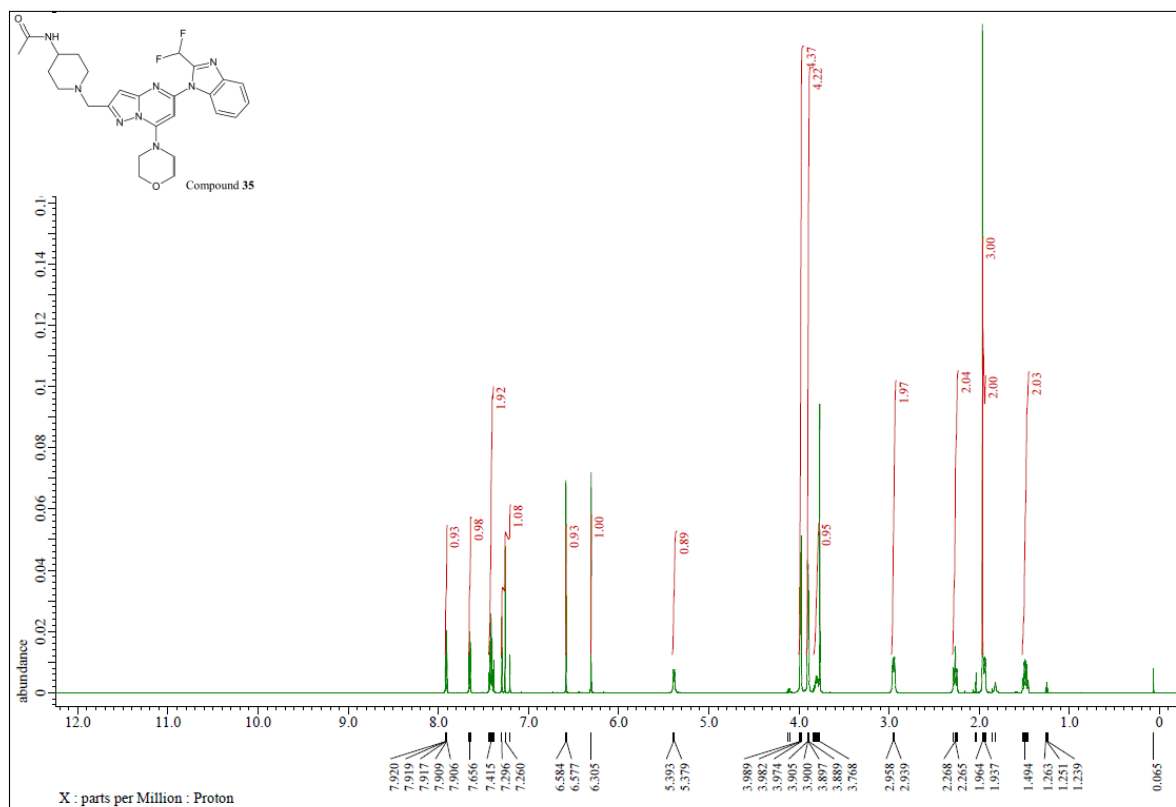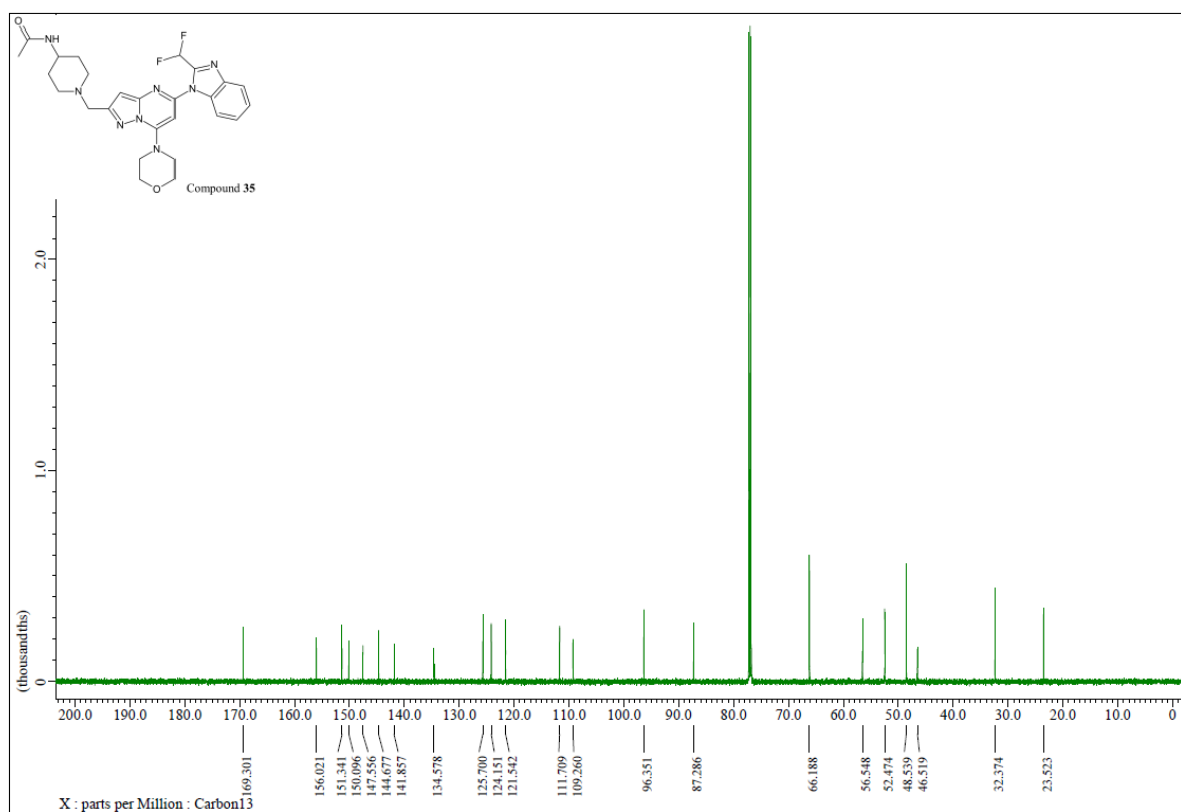

## Compound 35

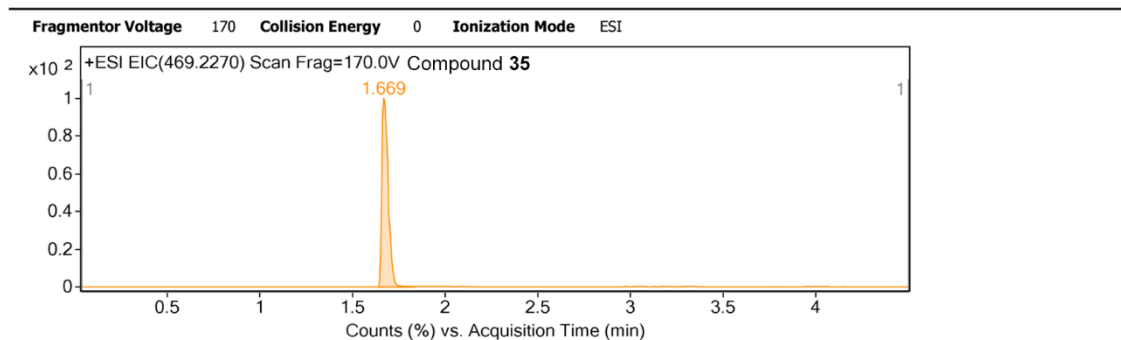

### Integration Peak List

| Peak | Start | RT    | End   | Height     | Area       | Area % |
|------|-------|-------|-------|------------|------------|--------|
| 1    | 1.634 | 1.669 | 1.835 | 3781886.04 | 9105302.42 | 100    |

### Spectra

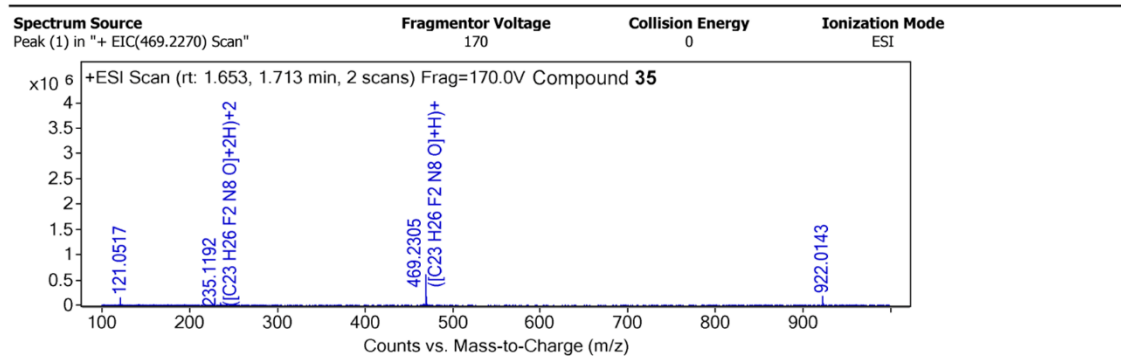

### Peak List

| m/z      | z | Abund    | Name        | Formula         | Ion    | Score (DB) | Hits (DB) |
|----------|---|----------|-------------|-----------------|--------|------------|-----------|
| 469.2305 | 1 | 601001.5 | Compound 35 | C23 H26 F2 N8 O | (M+H)+ | 97.11      | 2         |

--- End Of Report ---

# Compound 36

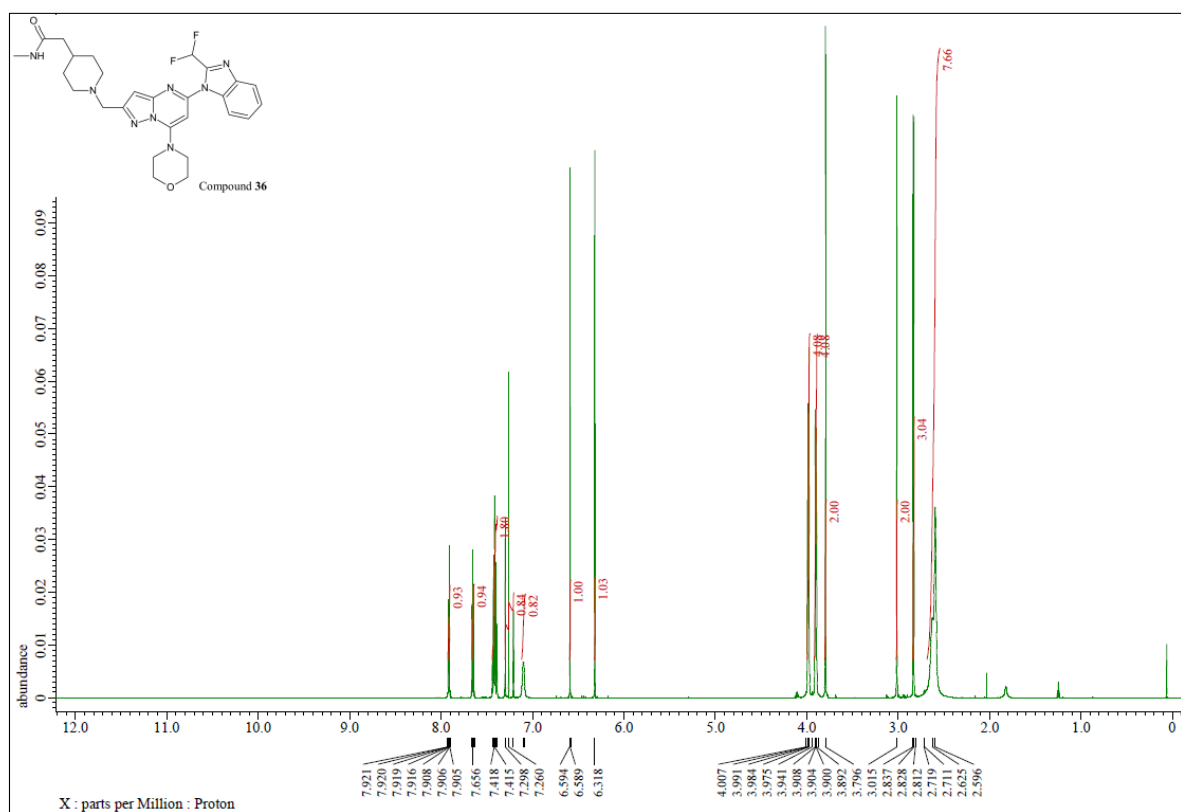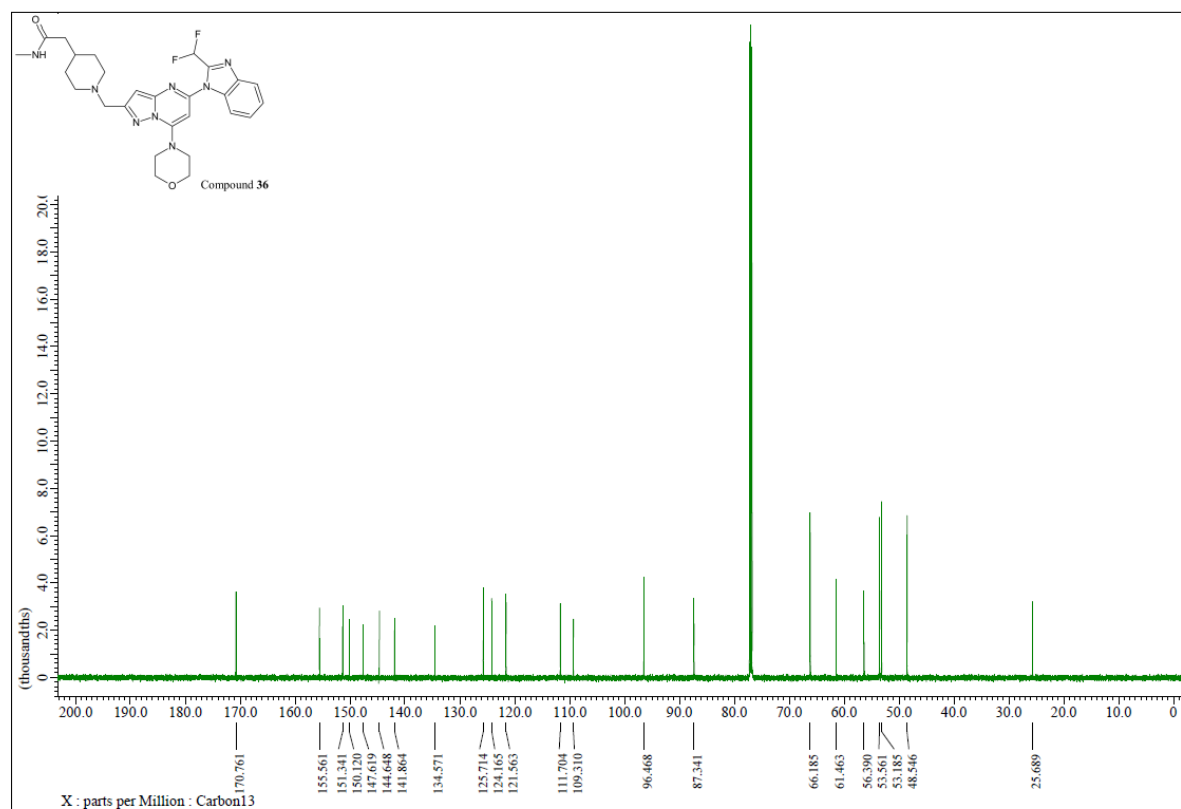

# Compound 36

| Name        | Obs. m/z  | Obs. RT | Obs. Mass | Tgt Formula      | Tgt Mass  | Tgt Mass Error | Find Cpds Algorit |
|-------------|-----------|---------|-----------|------------------|-----------|----------------|-------------------|
| Compound 36 | 270.63589 | 1.2     | 539.2572  | C26 H31 F2 N9 O2 | 539.25688 | 0.59           | Find by Formula   |

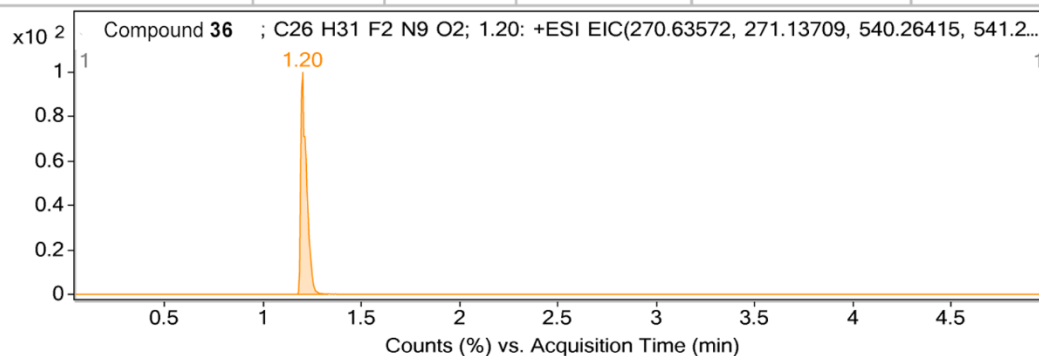

MS Zoomed Spectrum

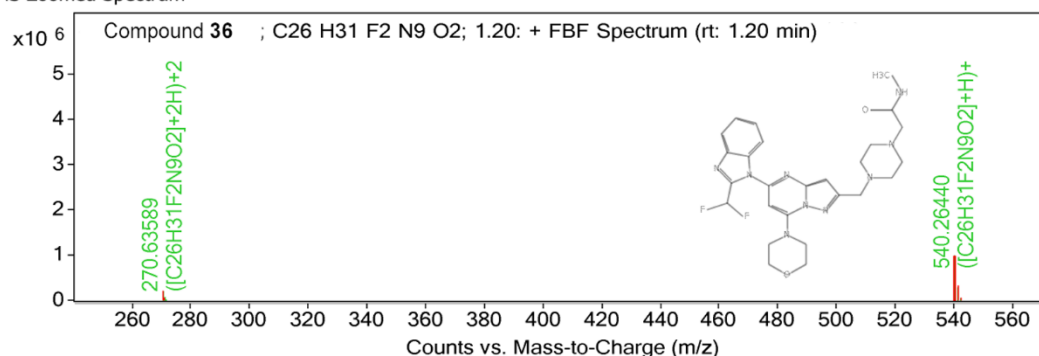

MS Zoomed Spectrum

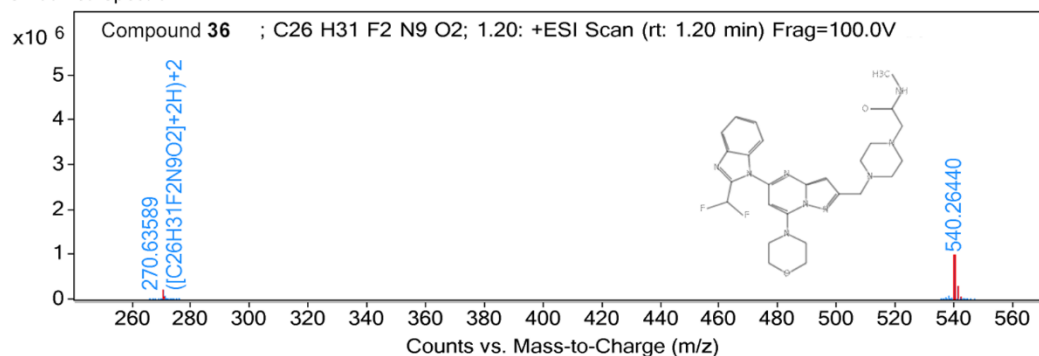

MS Spectrum Peak List

| Obs. m/z  | Charge | Abund     | Formula      | Ion/Isotope | Tgt Mass Error (ppm) |
|-----------|--------|-----------|--------------|-------------|----------------------|
| 270.63589 | 2      | 194345.84 | C26H31F2N9O2 | (M+2H)+2    |                      |
| 271.13742 | 2      | 59180.25  | C26H31F2N9O2 | (M+2H)+2    |                      |
| 271.63847 | 2      | 11750.46  | C26H31F2N9O2 | (M+2H)+2    |                      |
| 540.2644  | 1      | 976966.31 | C26H31F2N9O2 | (M+H)+      |                      |
| 541.26743 | 1      | 275591.88 | C26H31F2N9O2 | (M+H)+      |                      |
| 542.2695  | 1      | 40836.08  | C26H31F2N9O2 | (M+H)+      |                      |
| 270.63589 | 2      | 194345.84 | C26H31F2N9O2 | (M+2H)+2    | 0.64                 |
| 271.13742 | 2      | 59180.25  | C26H31F2N9O2 | (M+2H)+2    | 1.23                 |
| 271.63847 | 2      | 11750.46  | C26H31F2N9O2 | (M+2H)+2    | 0.28                 |
| 540.2644  | 1      | 976966.31 | C26H31F2N9O2 | (M+H)+      | 0.46                 |
| 540.2644  |        | 977749.31 |              |             |                      |
| 541.26743 | 1      | 275591.88 | C26H31F2N9O2 | (M+H)+      | 1                    |
| 542.2695  | 1      | 40836.08  | C26H31F2N9O2 | (M+H)+      | -0.02                |

--- End Of Report ---



# Compound 37

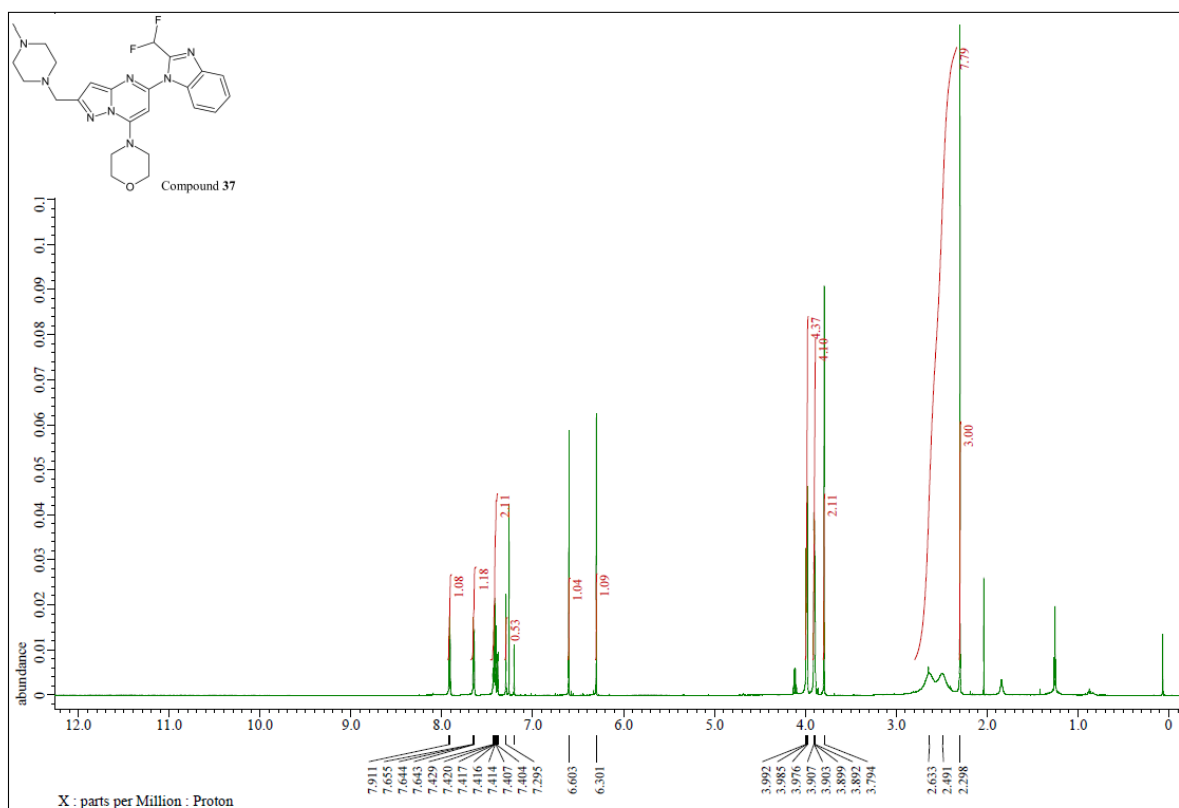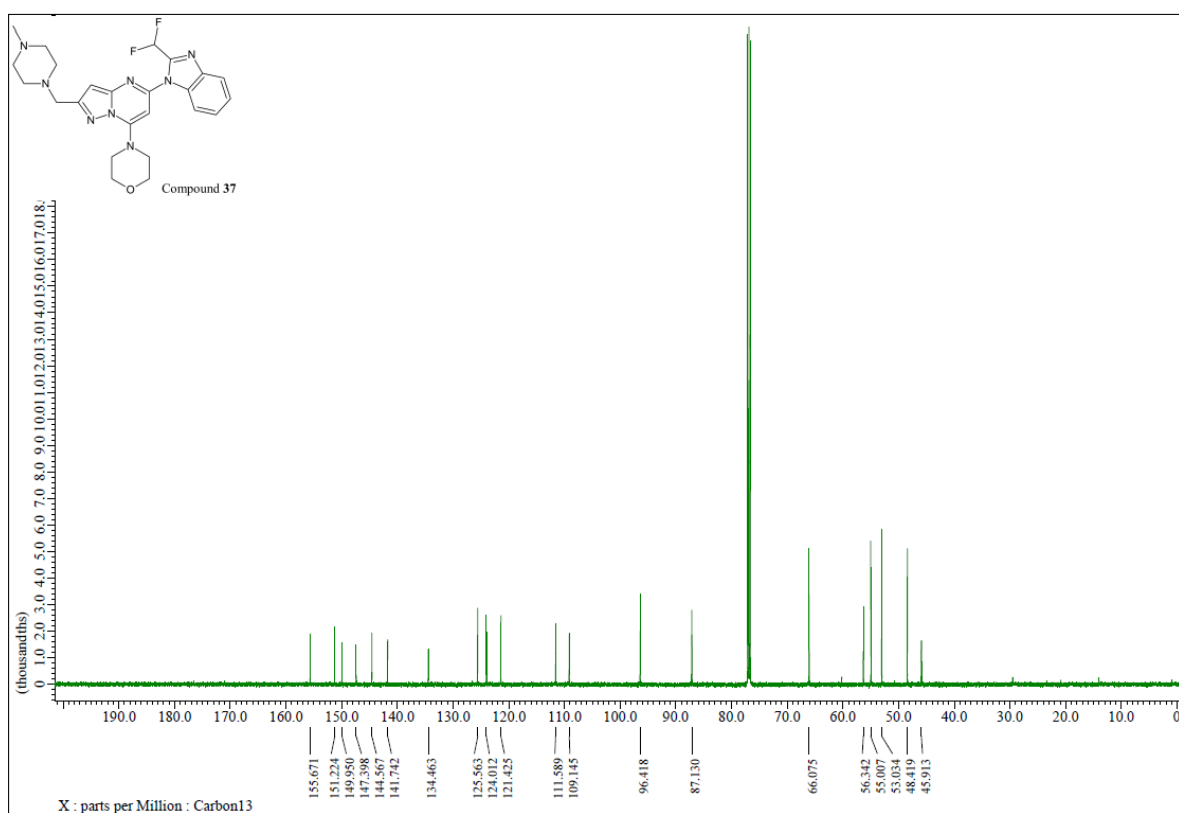

## Compound 37

| Name        | Obs. m/z  | Obs. RT | Obs. Mass | Tgt Formula                                                     | Tgt Mass  | Tgt Mass Error | Find Cpds Algorith |
|-------------|-----------|---------|-----------|-----------------------------------------------------------------|-----------|----------------|--------------------|
| Compound 37 | 242.12535 | 1.74    | 482.23576 | C <sub>24</sub> H <sub>28</sub> F <sub>2</sub> N <sub>8</sub> O | 482.23541 | 0.72           | Find by Formula    |

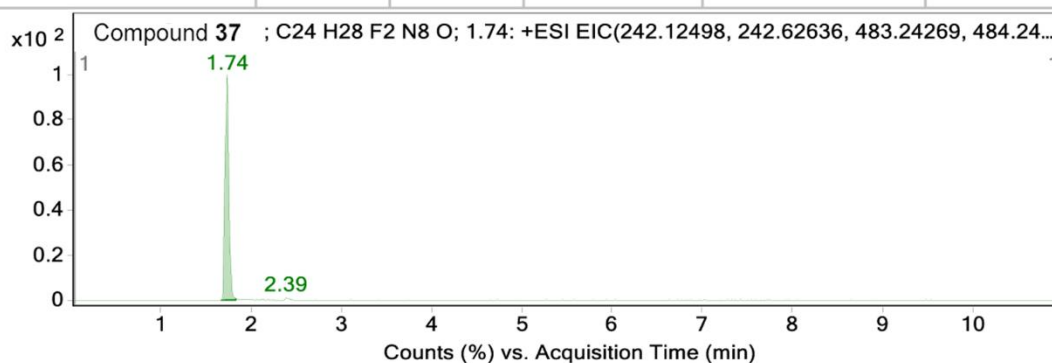

MS Zoomed Spectrum

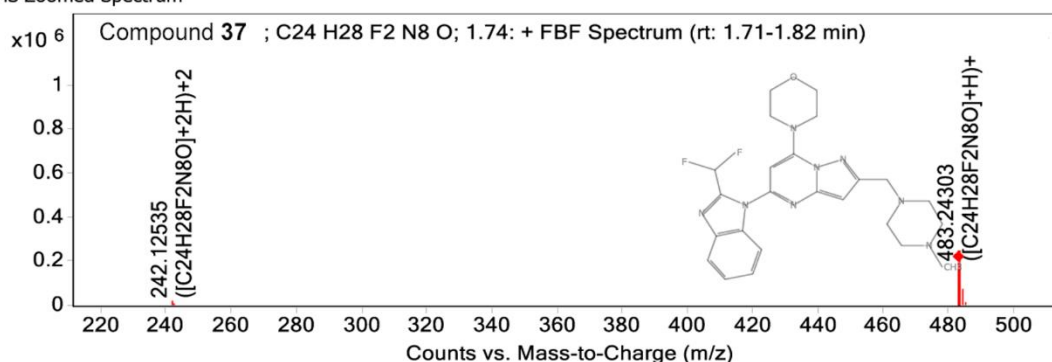

MS Zoomed Spectrum

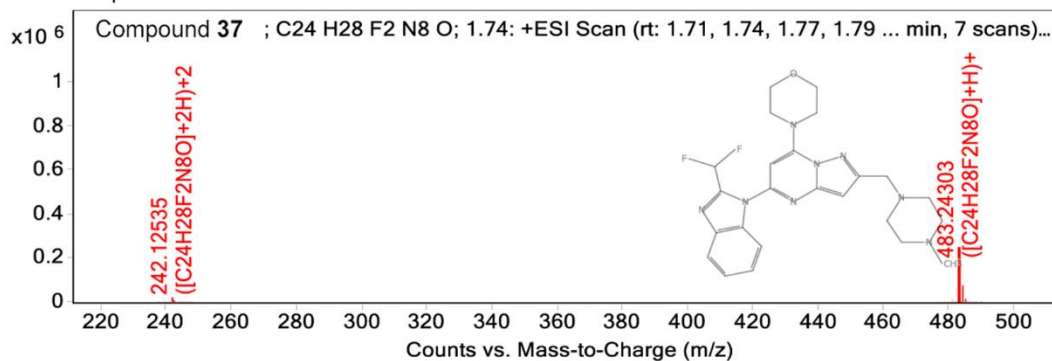

MS Spectrum Peak List

| Obs. m/z  | Charge | Abund     | Formula                                                         | Ion/Isotope | Tgt Mass Error (ppm) |
|-----------|--------|-----------|-----------------------------------------------------------------|-------------|----------------------|
| 242.12535 | 2      | 16177.19  | C <sub>24</sub> H <sub>28</sub> F <sub>2</sub> N <sub>8</sub> O | (M+2H)+2    |                      |
| 242.62664 | 2      | 4814.55   | C <sub>24</sub> H <sub>28</sub> F <sub>2</sub> N <sub>8</sub> O | (M+2H)+2    |                      |
| 243.12655 | 2      | 892.06    | C <sub>24</sub> H <sub>28</sub> F <sub>2</sub> N <sub>8</sub> O | (M+2H)+2    |                      |
| 483.24303 | 1      | 242894.67 | C <sub>24</sub> H <sub>28</sub> F <sub>2</sub> N <sub>8</sub> O | (M+H)+      |                      |
| 484.24583 | 1      | 62366.9   | C <sub>24</sub> H <sub>28</sub> F <sub>2</sub> N <sub>8</sub> O | (M+H)+      |                      |
| 485.24787 | 1      | 8281.58   | C <sub>24</sub> H <sub>28</sub> F <sub>2</sub> N <sub>8</sub> O | (M+H)+      |                      |
| 242.12535 | 2      | 16177.19  | C <sub>24</sub> H <sub>28</sub> F <sub>2</sub> N <sub>8</sub> O | (M+2H)+2    | 1.5                  |
| 242.62664 | 2      | 4814.55   | C <sub>24</sub> H <sub>28</sub> F <sub>2</sub> N <sub>8</sub> O | (M+2H)+2    | 1.15                 |
| 243.12655 | 2      | 892.06    | C <sub>24</sub> H <sub>28</sub> F <sub>2</sub> N <sub>8</sub> O | (M+2H)+2    | -4.71                |
| 483.24303 | 1      | 242894.67 | C <sub>24</sub> H <sub>28</sub> F <sub>2</sub> N <sub>8</sub> O | (M+H)+      | 0.7                  |
| 483.24303 |        | 242894.67 |                                                                 |             |                      |
| 484.24583 | 1      | 62366.9   | C <sub>24</sub> H <sub>28</sub> F <sub>2</sub> N <sub>8</sub> O | (M+H)+      | 0.79                 |
| 485.24787 | 1      | 8281.58   | C <sub>24</sub> H <sub>28</sub> F <sub>2</sub> N <sub>8</sub> O | (M+H)+      | -0.51                |

# Compound 38

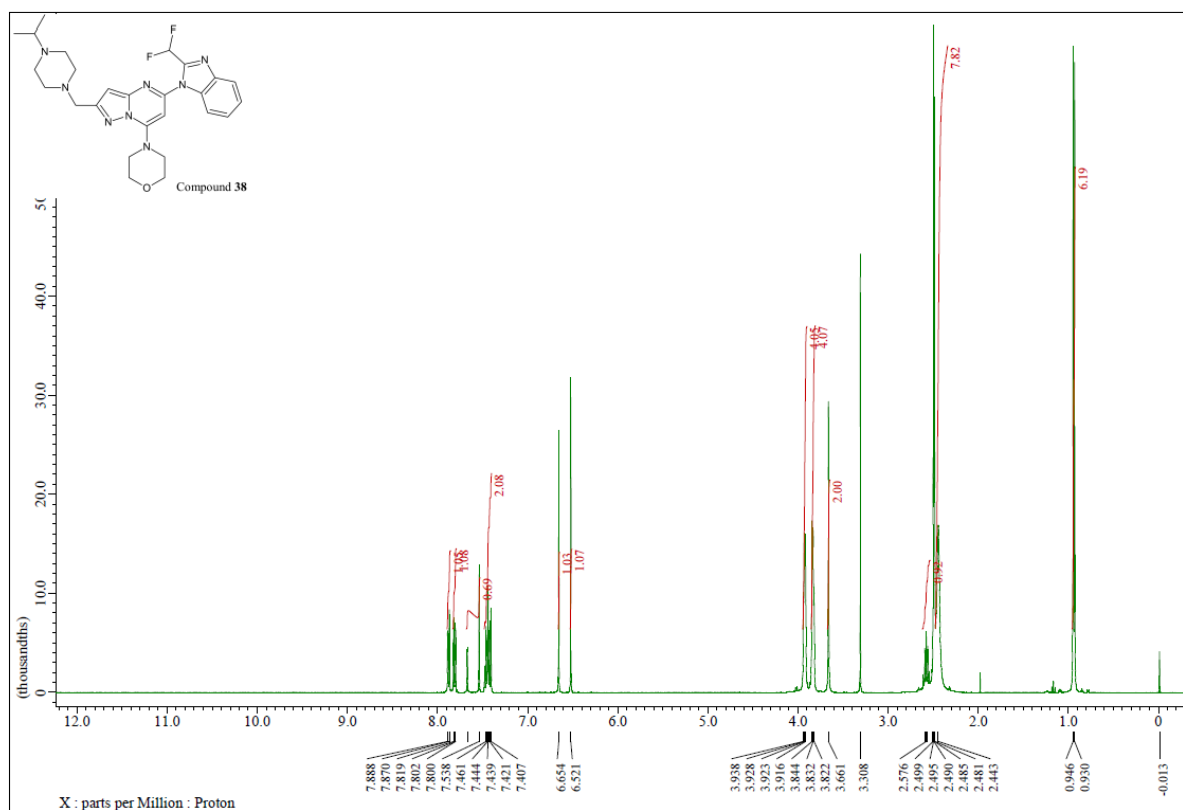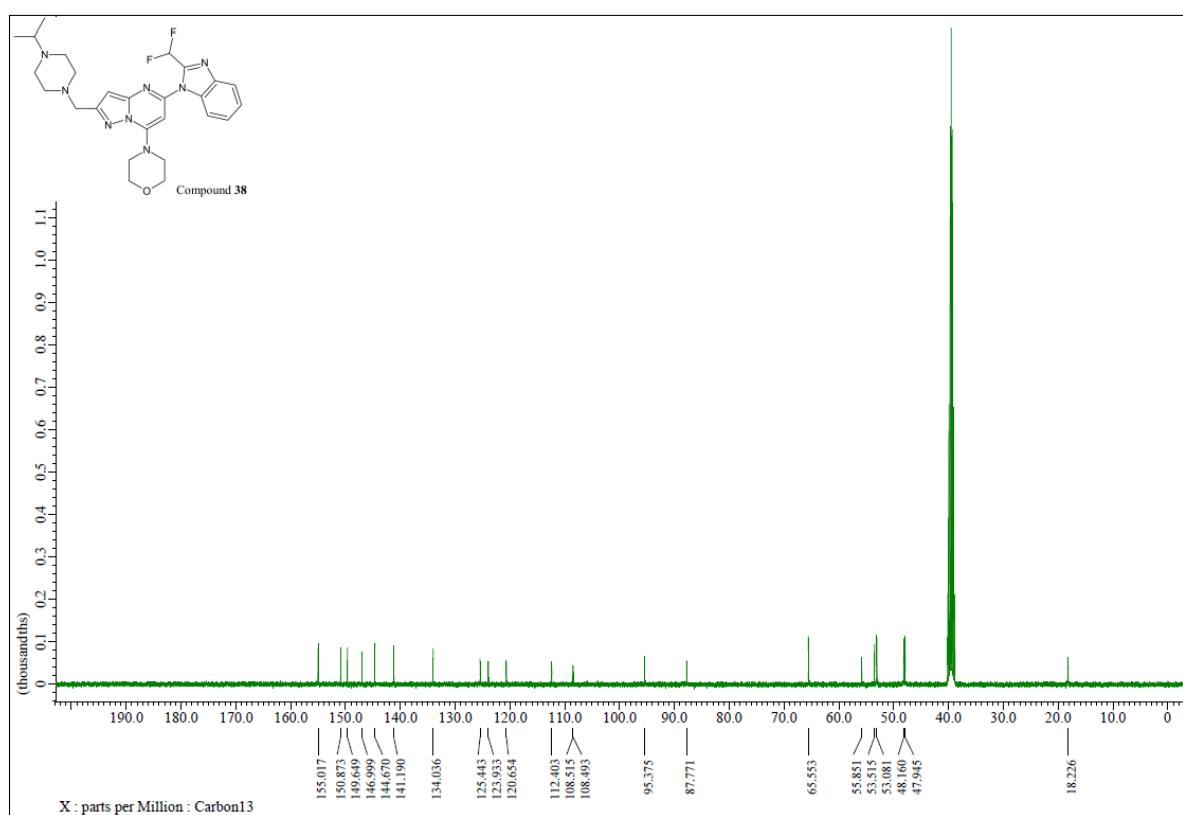

# Compound 38

| Name        | Obs. m/z | Obs. RT | Obs. Mass | Tgt Formula     | Tgt Mass  | Tgt Mass Error | Find Cpd Algorith |
|-------------|----------|---------|-----------|-----------------|-----------|----------------|-------------------|
| Compound 38 | 511.2743 | 1.91    | 510.26697 | C26 H32 F2 N8 O | 510.26671 | 0.51           | Find by Formula   |

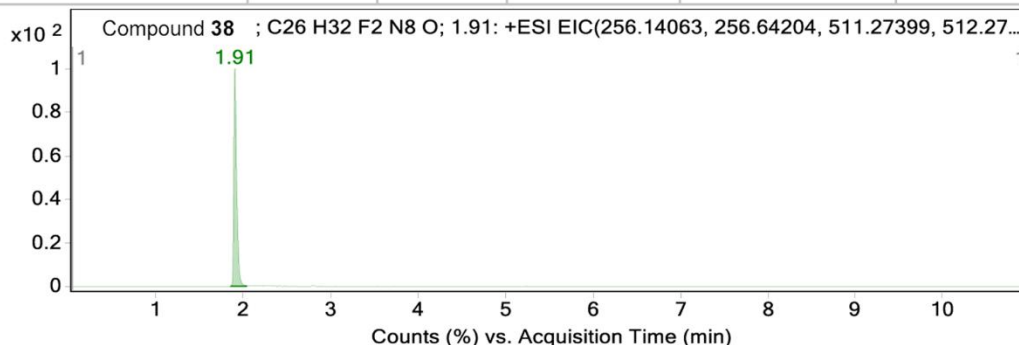

MS Zoomed Spectrum

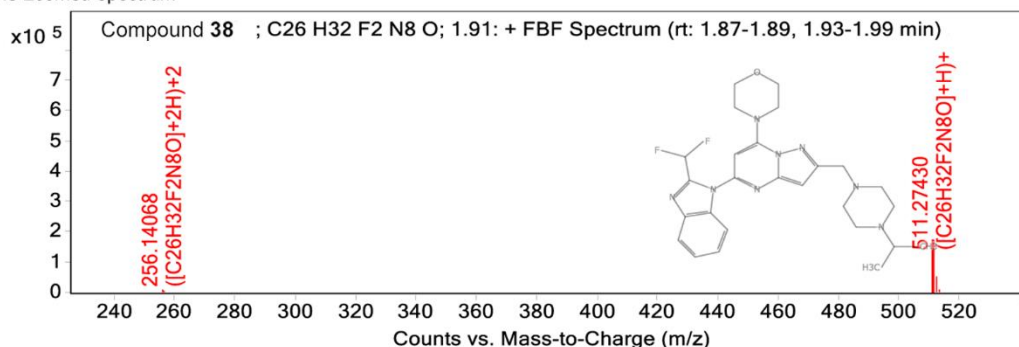

MS Zoomed Spectrum

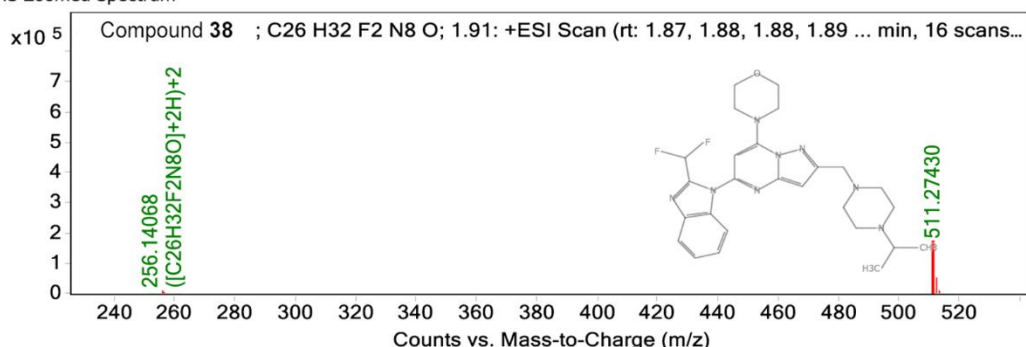

MS Spectrum Peak List

| Obs. m/z  | Charge | Abund    | Formula     | Ion/Isotope | Tgt Mass Error (ppm) |
|-----------|--------|----------|-------------|-------------|----------------------|
| 256.14068 | 2      | 7563.88  | C26H32F2N8O | (M+2H)+2    |                      |
| 256.64215 | 2      | 2152.23  | C26H32F2N8O | (M+2H)+2    |                      |
| 257.14261 | 2      | 324.73   | C26H32F2N8O | (M+2H)+2    |                      |
| 511.2743  | 1      | 170137   | C26H32F2N8O | (M+H)+      |                      |
| 512.27694 | 1      | 48697.73 | C26H32F2N8O | (M+H)+      |                      |
| 513.27954 | 1      | 7568.92  | C26H32F2N8O | (M+H)+      |                      |
| 256.14068 | 2      | 7563.88  | C26H32F2N8O | (M+2H)+2    | 0.17                 |
| 256.64215 | 2      | 2152.23  | C26H32F2N8O | (M+2H)+2    | 0.44                 |
| 257.14261 | 2      | 324.73   | C26H32F2N8O | (M+2H)+2    | -3.07                |
| 511.2743  |        | 170137   |             |             | 0.61                 |
| 511.2743  | 1      | 170137   | C26H32F2N8O | (M+H)+      | 0.61                 |
| 512.27694 | 1      | 48697.73 | C26H32F2N8O | (M+H)+      | 0.28                 |
| 513.27954 | 1      | 7568.92  | C26H32F2N8O | (M+H)+      | 0.03                 |

--- End Of Report ---

# Compound 40

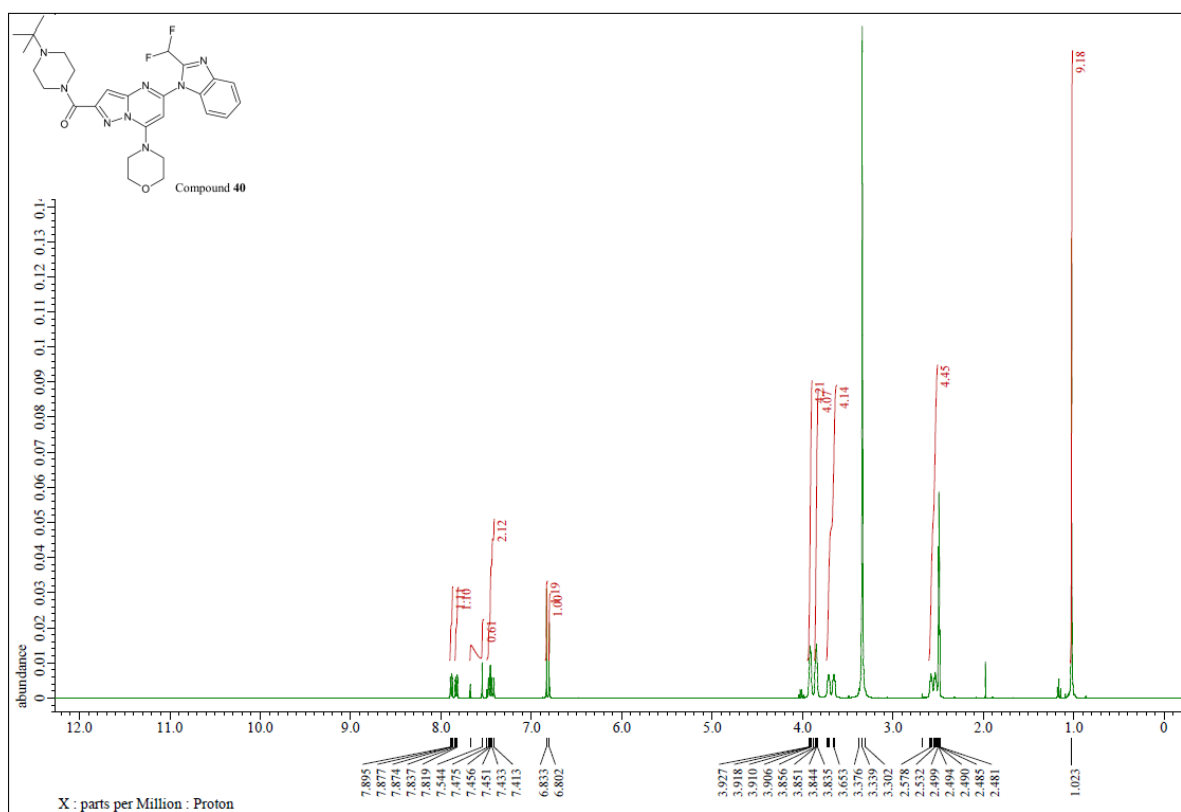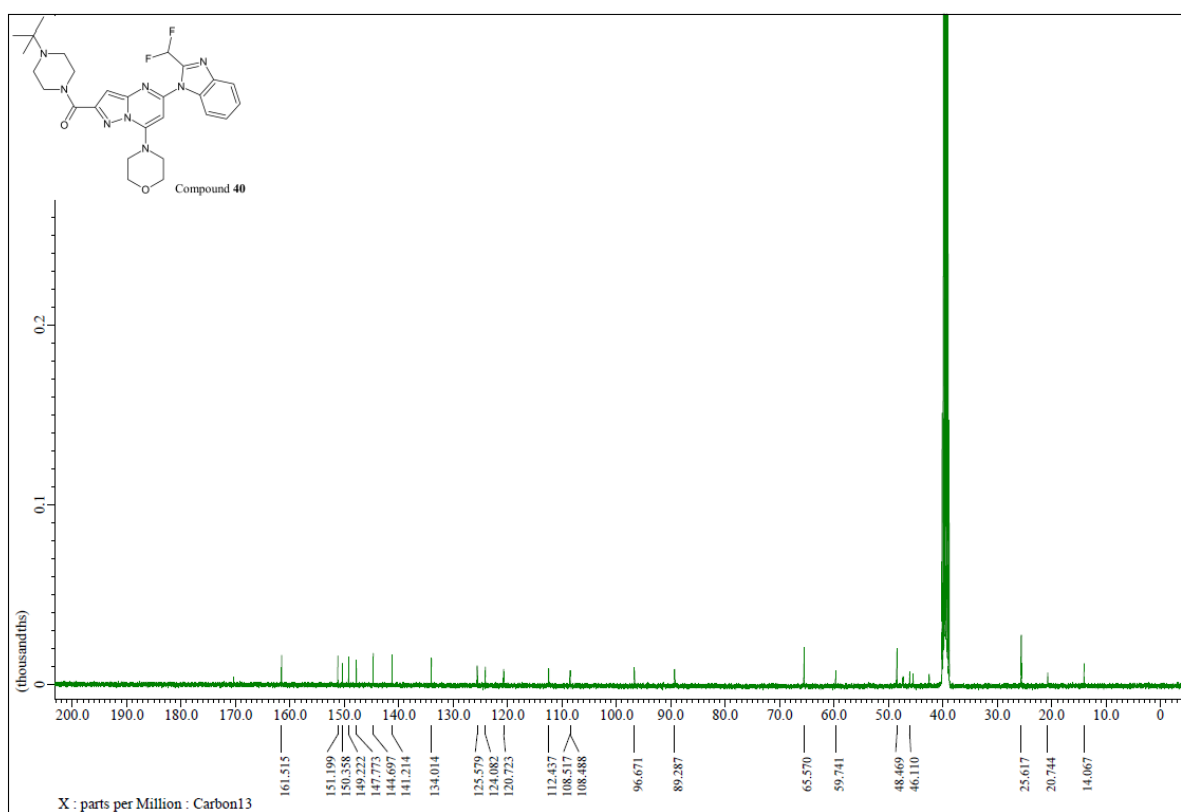

# Compound 40

| Name        | Obs. m/z  | Obs. RT | Obs. Mass | Tgt Formula      | Tgt Mass  | Tgt Mass Error | Find Cpds Alaorit |
|-------------|-----------|---------|-----------|------------------|-----------|----------------|-------------------|
| Compound 40 | 539.26912 | 1.31    | 538.26195 | C27 H32 F2 N8 O2 | 538.26163 | 0.6            | Find by Formula   |

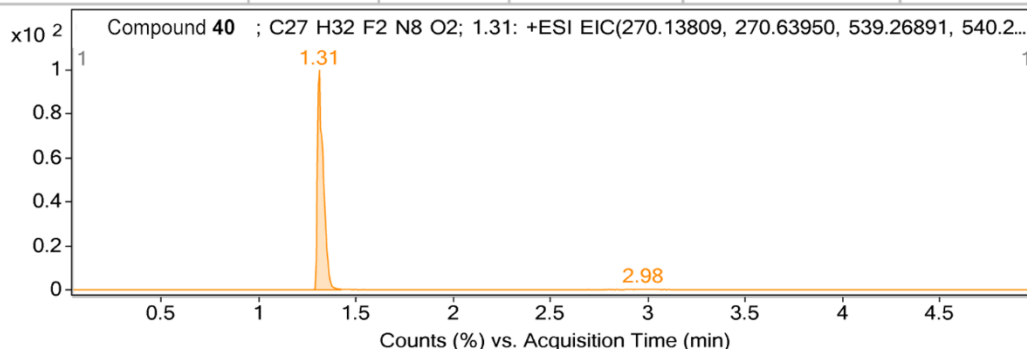

MS Zoomed Spectrum

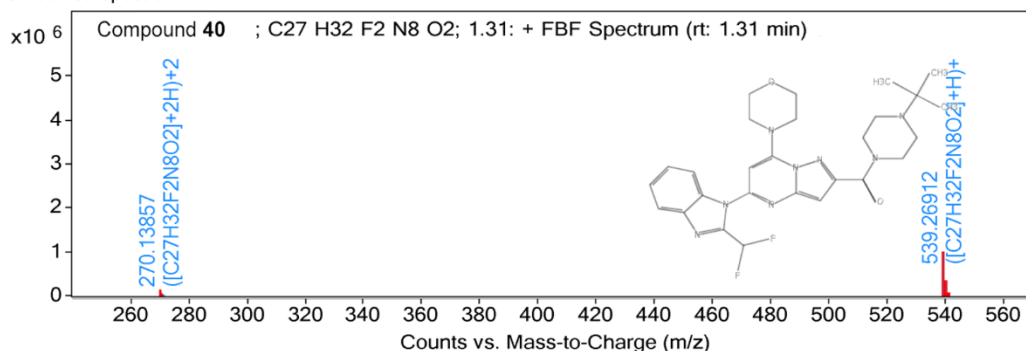

MS Zoomed Spectrum

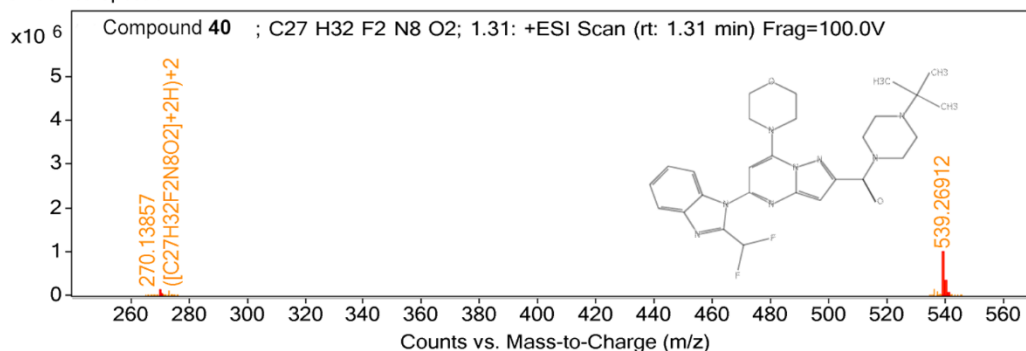

MS Spectrum Peak List

| Obs. m/z  | Charge | Abund     | Formula      | Ion/Isotope | Tgt Mass Error (ppm) |
|-----------|--------|-----------|--------------|-------------|----------------------|
| 270.13857 | 2      | 125455.36 | C27H32F2N8O2 | (M+2H)+2    |                      |
| 270.63974 | 2      | 46195.77  | C27H32F2N8O2 | (M+2H)+2    |                      |
| 271.14284 | 2      | 8525.27   | C27H32F2N8O2 | (M+2H)+2    |                      |
| 271.64284 | 2      | 714.39    | C27H32F2N8O2 | (M+2H)+2    |                      |
| 539.26912 | 1      | 989648.63 | C27H32F2N8O2 | (M+H)+      |                      |
| 540.27212 | 1      | 296316.03 | C27H32F2N8O2 | (M+H)+      |                      |
| 541.27406 | 1      | 46140.58  | C27H32F2N8O2 | (M+H)+      |                      |
| 270.13857 | 2      | 125455.36 | C27H32F2N8O2 | (M+2H)+2    | 1.76                 |
| 270.63974 | 2      | 46195.77  | C27H32F2N8O2 | (M+2H)+2    | 0.86                 |
| 271.14284 | 2      | 8525.27   | C27H32F2N8O2 | (M+2H)+2    | 7.33                 |
| 271.64284 | 2      | 714.39    | C27H32F2N8O2 | (M+2H)+2    | 2.5                  |
| 539.26912 | 1      | 989648.63 | C27H32F2N8O2 | (M+H)+      | 0.39                 |
| 539.26912 |        | 991037.31 |              |             |                      |
| 540.27212 | 1      | 296316.03 | C27H32F2N8O2 | (M+H)+      | 0.73                 |
| 541.27406 | 1      | 46140.58  | C27H32F2N8O2 | (M+H)+      | -0.68                |

--- End Of Report ---

# Compound 41

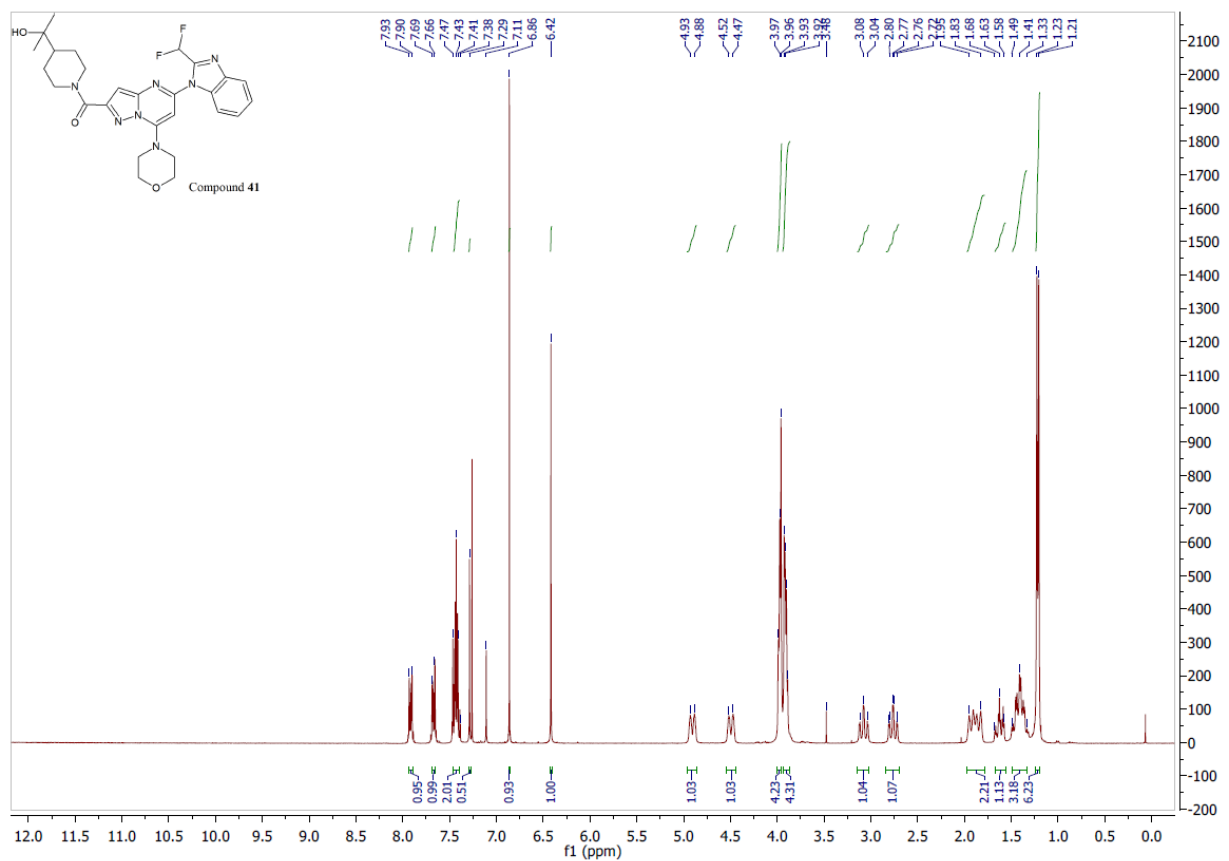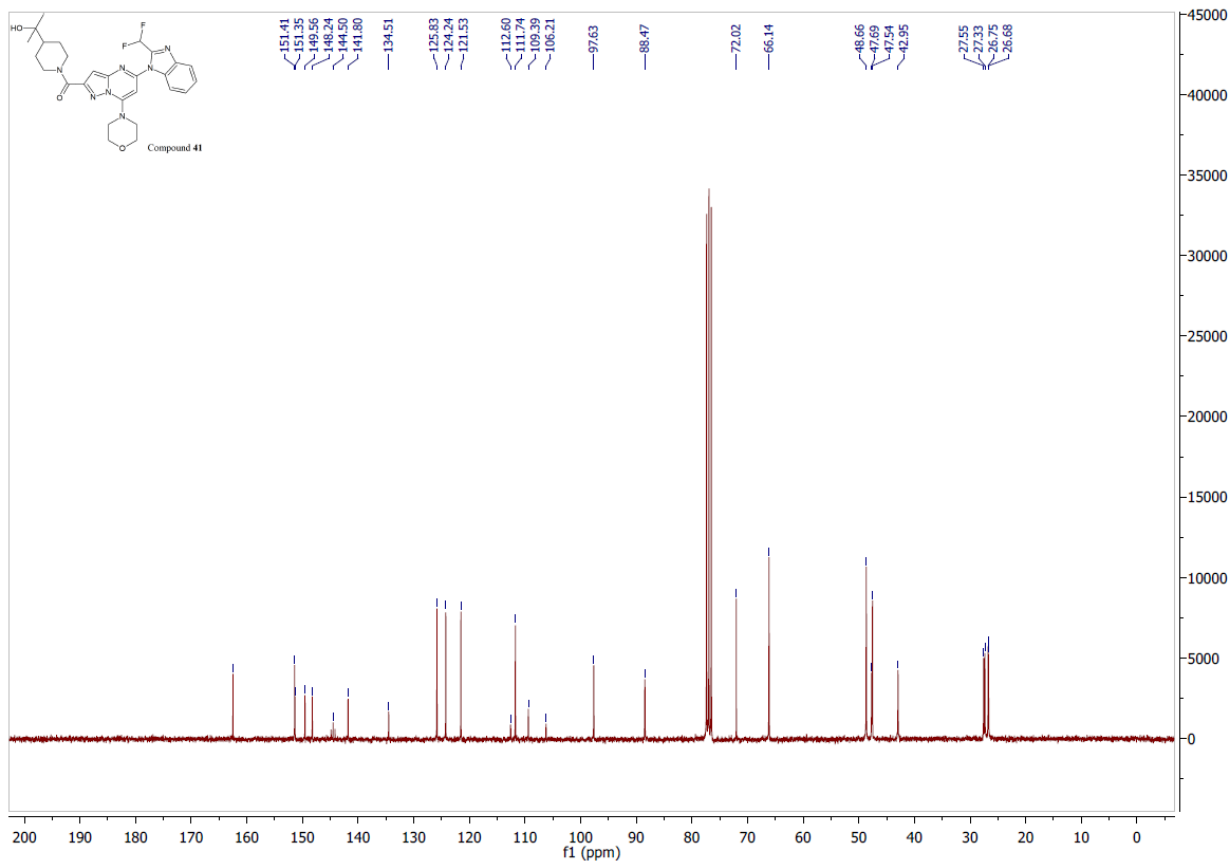

## Compound 41

| Compound Label | Name        | m/z       | RT   | Algorithm       | Mass      |
|----------------|-------------|-----------|------|-----------------|-----------|
| Compound 41    | Compound 41 | 540.25488 | 2.18 | Find by Formula | 539.24756 |

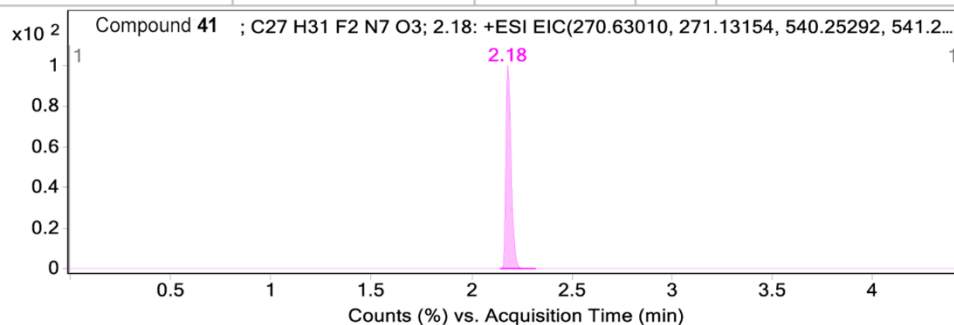

MS Zoomed Spectrum

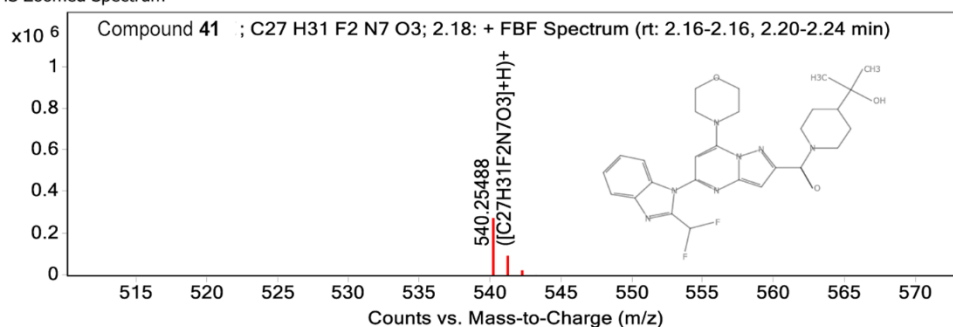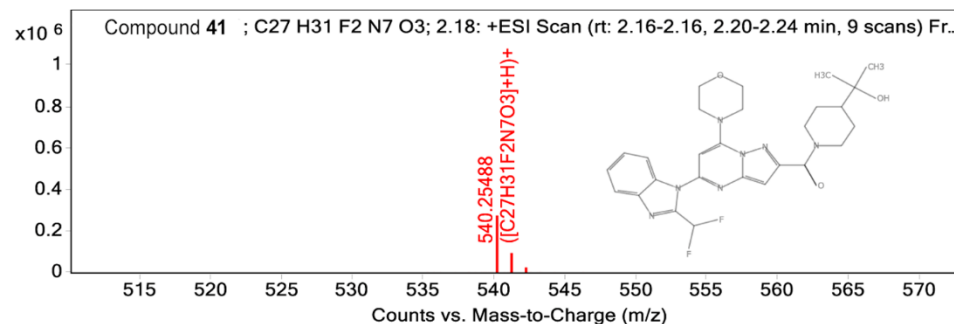

MS Spectrum Peak List

| m/z       | Calc m/z  | Diff(ppm) | z | Abund     | Formula                                                                      | Ion                |
|-----------|-----------|-----------|---|-----------|------------------------------------------------------------------------------|--------------------|
| 540.25488 | 540.25292 | 3.63      | 1 | 270345.84 | C <sub>27</sub> H <sub>31</sub> F <sub>2</sub> N <sub>7</sub> O <sub>3</sub> | (M+H) <sup>+</sup> |
| 541.25773 | 541.25581 | 3.55      | 1 | 82090.26  | C <sub>27</sub> H <sub>31</sub> F <sub>2</sub> N <sub>7</sub> O <sub>3</sub> | (M+H) <sup>+</sup> |
| 542.25958 | 542.25852 | 1.95      | 1 | 12735.37  | C <sub>27</sub> H <sub>31</sub> F <sub>2</sub> N <sub>7</sub> O <sub>3</sub> | (M+H) <sup>+</sup> |
| 543.26188 | 543.26112 | 1.4       | 1 | 1682.81   | C <sub>27</sub> H <sub>31</sub> F <sub>2</sub> N <sub>7</sub> O <sub>3</sub> | (M+H) <sup>+</sup> |

--- End Of Report ---



# Compound 42

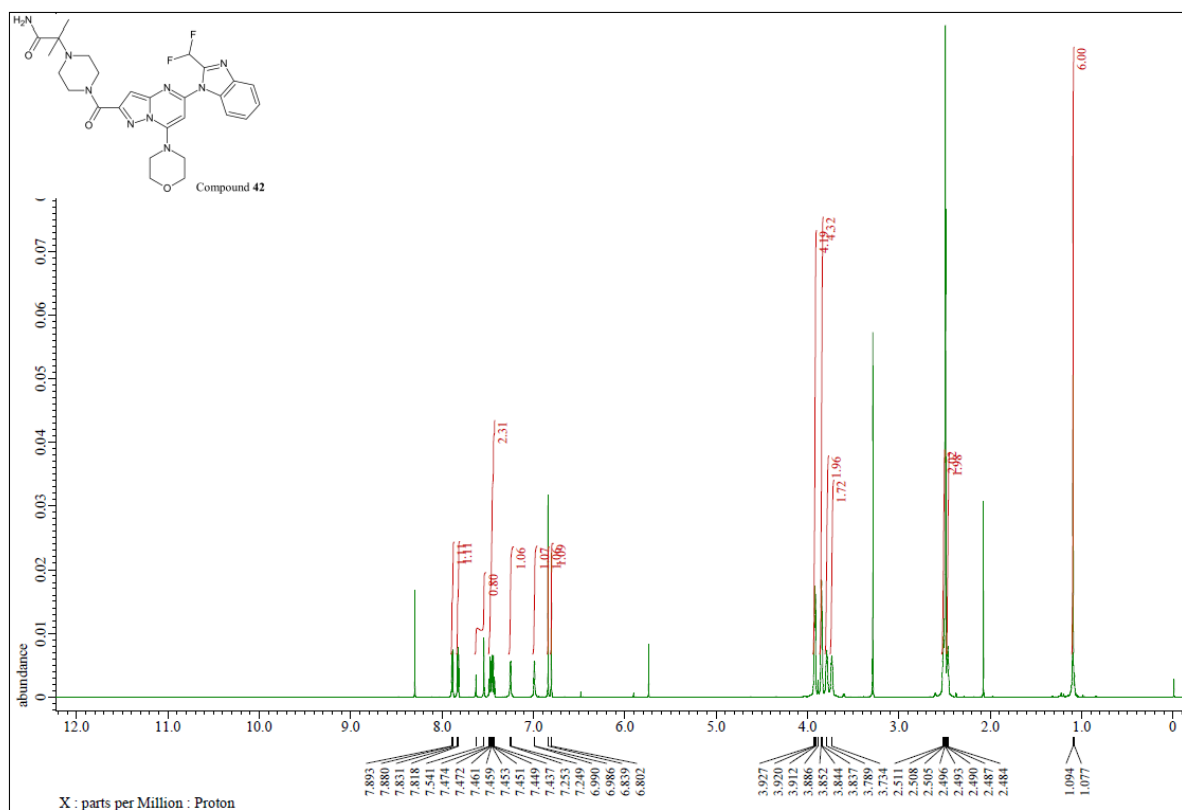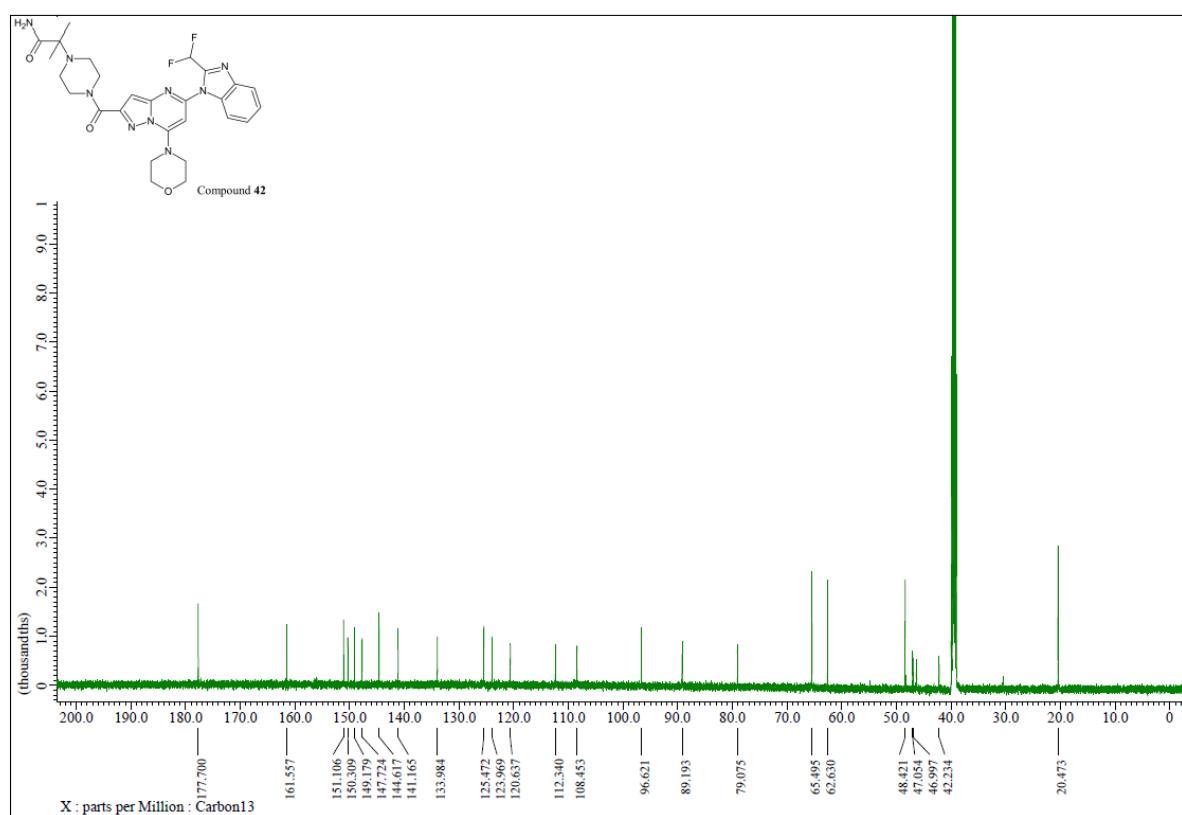

## Compound 42

| Name        | Obs. m/z  | Obs. RT | Obs. Mass | Tgt Formula      | Tgt Mass  | Tgt Mass Error | Find Cpds Algorith |
|-------------|-----------|---------|-----------|------------------|-----------|----------------|--------------------|
| Compound 42 | 568.25867 | 1.312   | 567.25125 | C27 H31 F2 N9 O3 | 567.25179 | -0.95          | Find by Formula    |

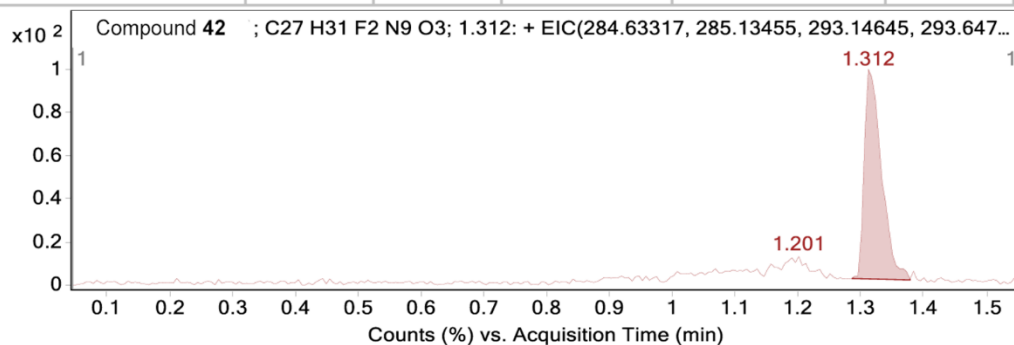

MS Zoomed Spectrum

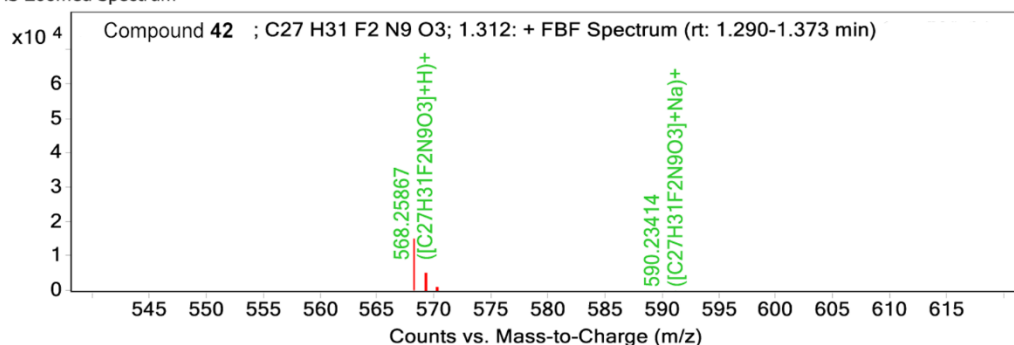

MS Zoomed Spectrum

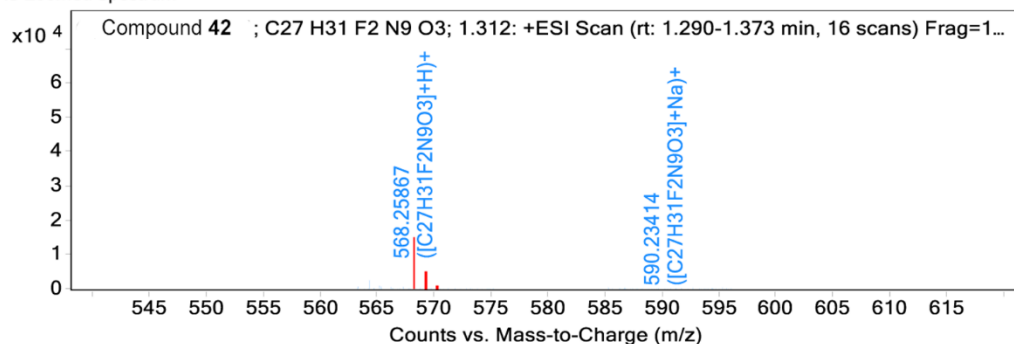

MS Spectrum Peak List

| Obs. m/z  | Charge | Abund    | Formula      | Ion/Isotope | Tgt Mass Error (ppm) |
|-----------|--------|----------|--------------|-------------|----------------------|
| 568.25867 | 1      | 14840.44 | C27H31F2N9O3 | (M+H)+      |                      |
| 569.26124 | 1      | 4302.48  | C27H31F2N9O3 | (M+H)+      |                      |
| 570.26212 | 1      | 858.69   | C27H31F2N9O3 | (M+H)+      |                      |
| 590.23414 | 1      | 59.04    | C27H31F2N9O3 | (M+Na)+     |                      |
| 591.24508 | 1      | 29.53    | C27H31F2N9O3 | (M+Na)+     |                      |
| 568.25867 | 1      | 14840.44 | C27H31F2N9O3 | (M+H)+      | -0.7                 |
| 569.26124 | 1      | 4302.48  | C27H31F2N9O3 | (M+H)+      | -1.03                |
| 570.26212 | 1      | 858.69   | C27H31F2N9O3 | (M+H)+      | -4.07                |
| 590.23414 | 1      | 59.04    | C27H31F2N9O3 | (M+Na)+     | -11.65               |
| 591.24508 | 1      | 29.53    | C27H31F2N9O3 | (M+Na)+     | 2.21                 |

--- End Of Report ---

# Compound 43

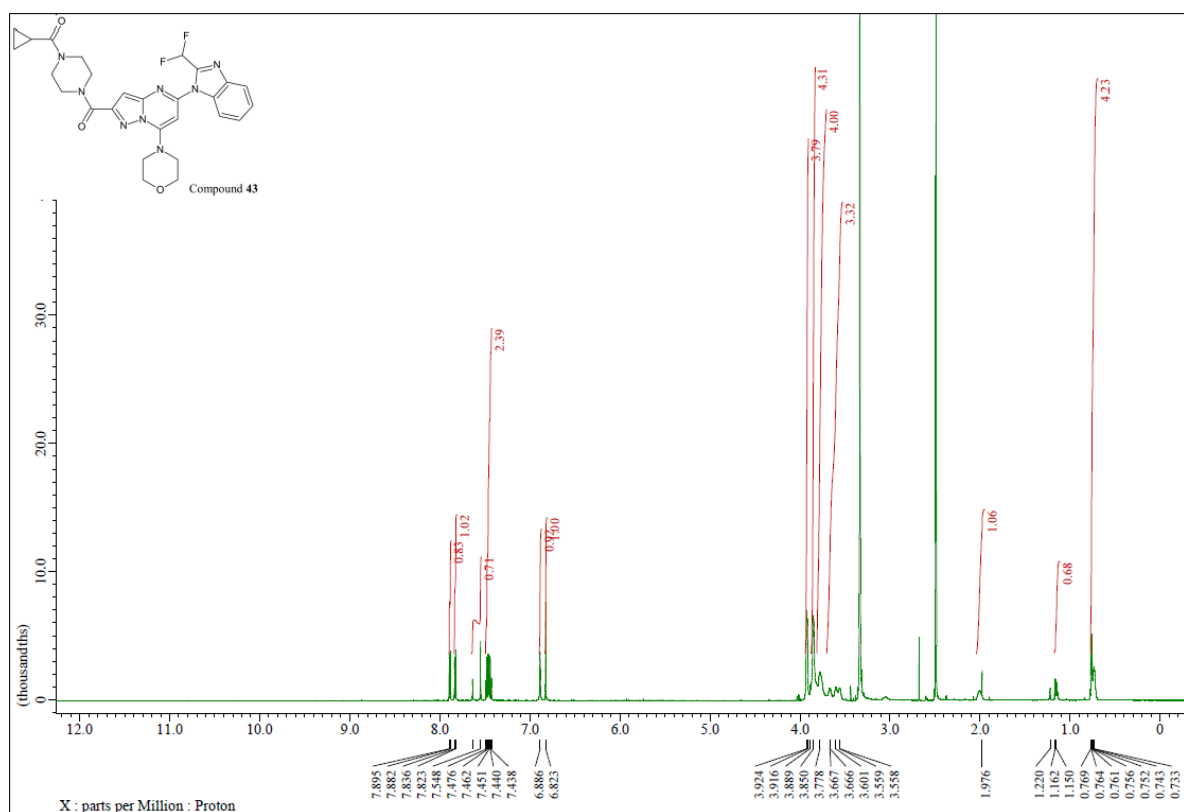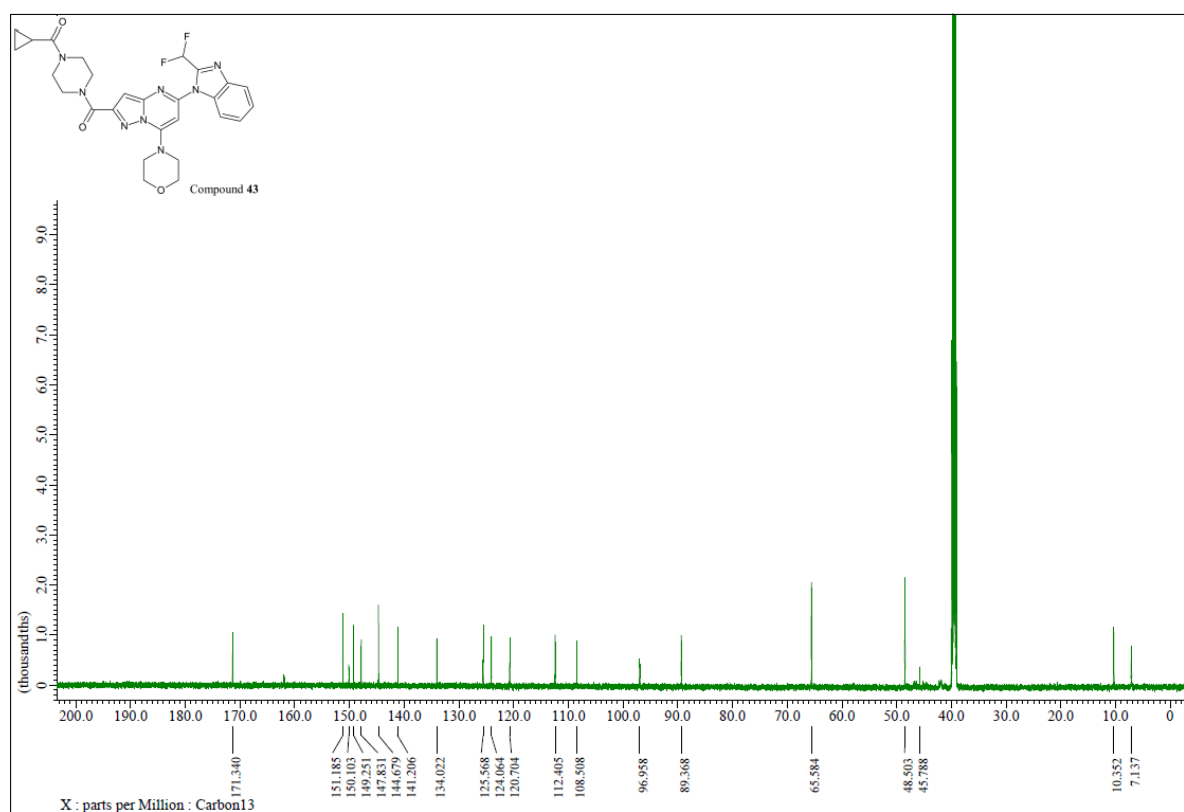

## Compound 43

| Compound Label | Name        | m/z      | RT   | Algorithm       | Mass      |
|----------------|-------------|----------|------|-----------------|-----------|
| Compound 43    | Compound 43 | 276.1201 | 1.97 | Find by Formula | 550.22601 |

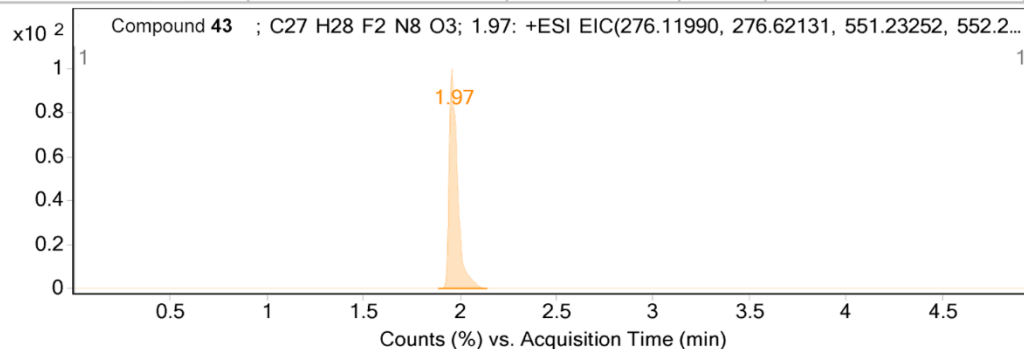

MS Zoomed Spectrum

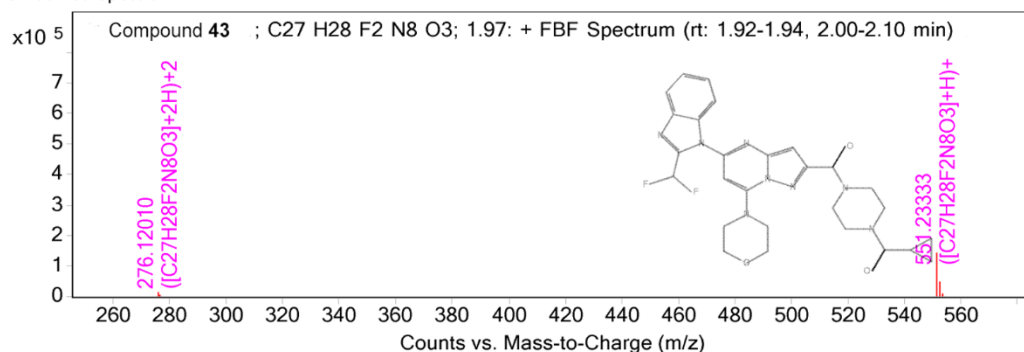

MS Zoomed Spectrum

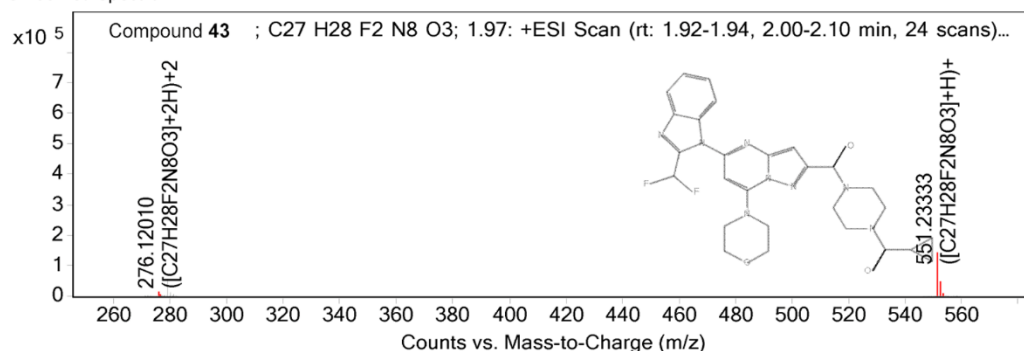

MS Spectrum Peak List

| m/z       | Calc m/z  | Diff(ppm) | z | Abund     | Formula                                                                      | Ion      |
|-----------|-----------|-----------|---|-----------|------------------------------------------------------------------------------|----------|
| 276.1201  | 276.1199  | 0.75      | 2 | 12256.77  | C <sub>27</sub> H <sub>28</sub> F <sub>2</sub> N <sub>8</sub> O <sub>3</sub> | (M+2H)+2 |
| 276.6216  | 276.62131 | 1.04      | 2 | 3979.86   | C <sub>27</sub> H <sub>28</sub> F <sub>2</sub> N <sub>8</sub> O <sub>3</sub> | (M+2H)+2 |
| 277.12341 | 277.12264 | 2.79      | 2 | 963.82    | C <sub>27</sub> H <sub>28</sub> F <sub>2</sub> N <sub>8</sub> O <sub>3</sub> | (M+2H)+2 |
| 277.62135 | 277.62391 | -9.23     | 2 | 52.08     | C <sub>27</sub> H <sub>28</sub> F <sub>2</sub> N <sub>8</sub> O <sub>3</sub> | (M+2H)+2 |
| 551.23333 | 551.23252 | 1.47      | 1 | 142347.36 | C <sub>27</sub> H <sub>28</sub> F <sub>2</sub> N <sub>8</sub> O <sub>3</sub> | (M+H)+   |
| 552.23614 | 552.23534 | 1.45      | 1 | 44714.86  | C <sub>27</sub> H <sub>28</sub> F <sub>2</sub> N <sub>8</sub> O <sub>3</sub> | (M+H)+   |
| 553.23847 | 553.23799 | 0.85      | 1 | 7254.93   | C <sub>27</sub> H <sub>28</sub> F <sub>2</sub> N <sub>8</sub> O <sub>3</sub> | (M+H)+   |
| 554.24149 | 554.24055 | 1.71      | 1 | 890.85    | C <sub>27</sub> H <sub>28</sub> F <sub>2</sub> N <sub>8</sub> O <sub>3</sub> | (M+H)+   |

--- End Of Report ---

# Compound 44

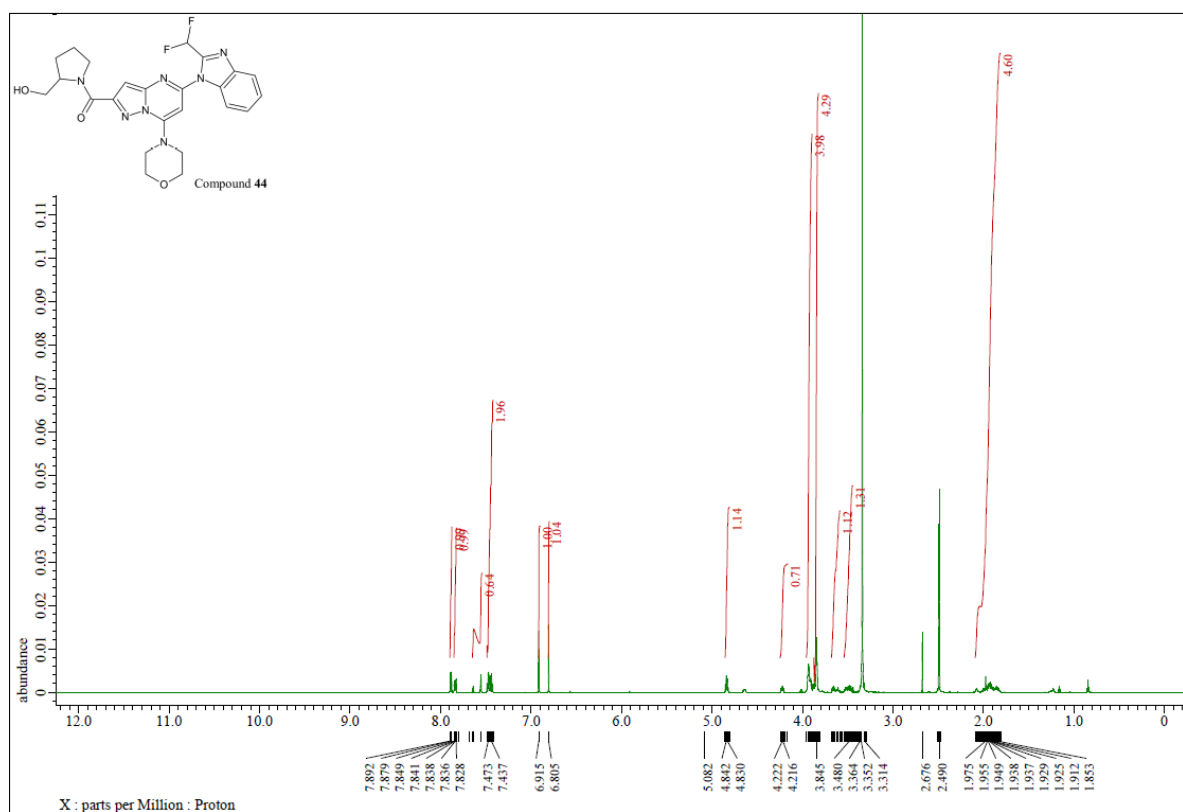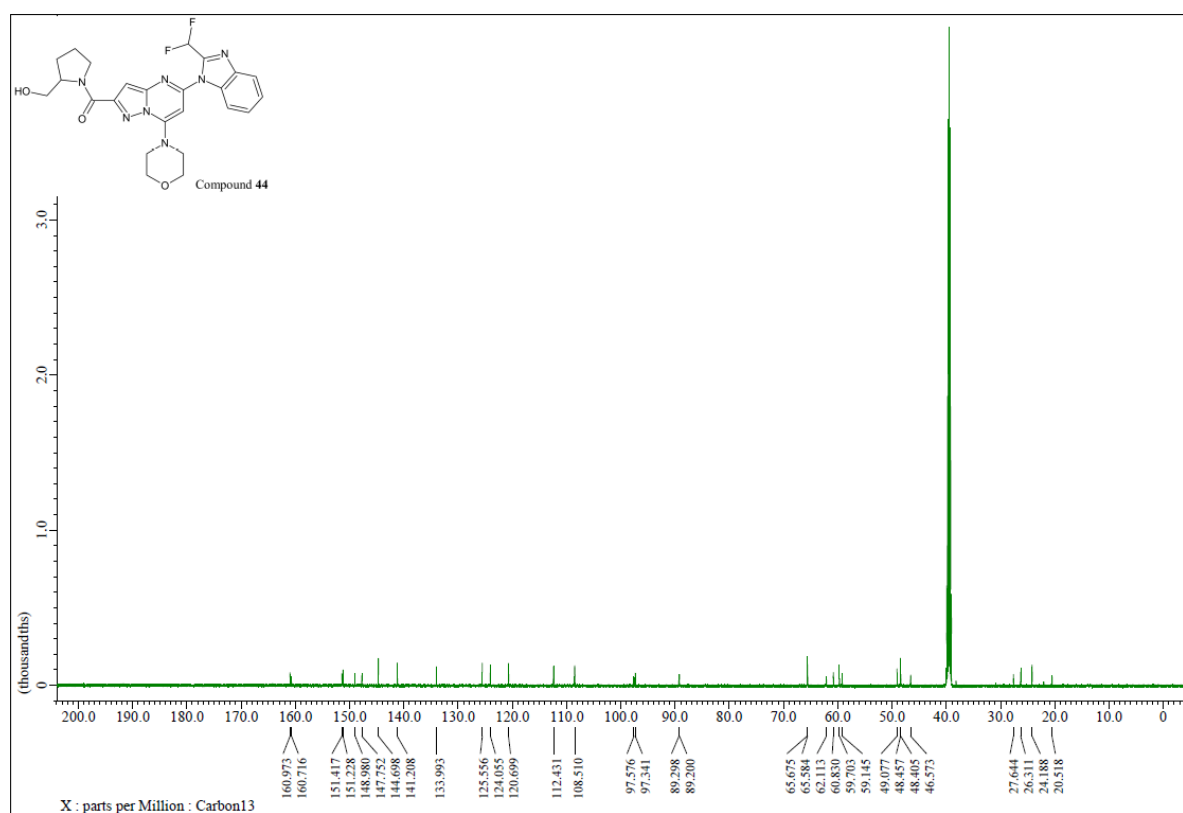

## Compound 44

| Compound Label | Name        | m/z       | RT   | Algorithm       | Mass      |
|----------------|-------------|-----------|------|-----------------|-----------|
| Compound 44    | Compound 44 | 498.20662 | 1.32 | Find by Formula | 497.19931 |

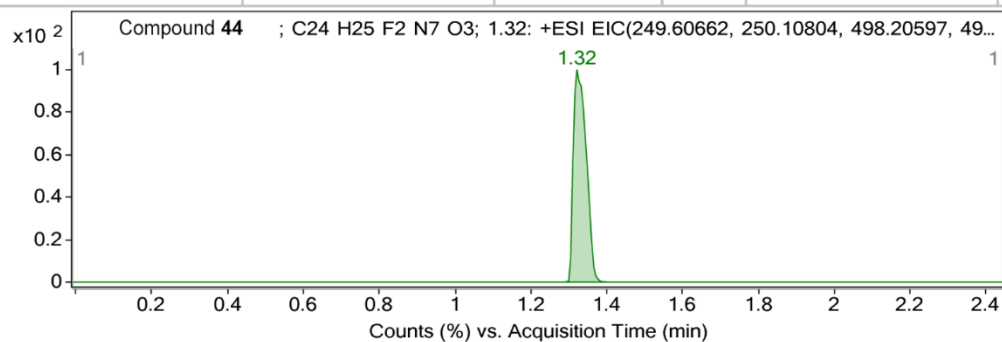

MS Zoomed Spectrum

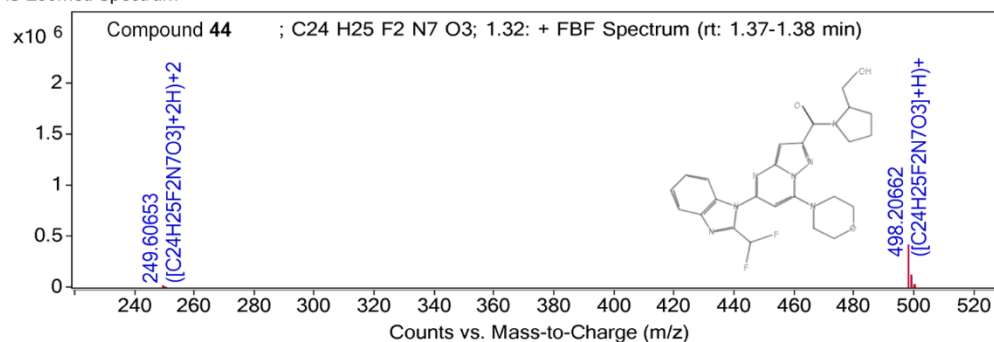

MS Zoomed Spectrum

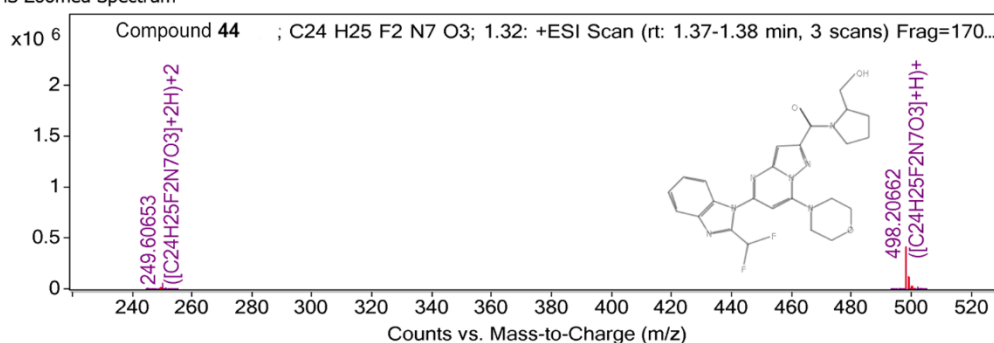

MS Spectrum Peak List

| m/z       | Calc m/z  | Diff(ppm) | z | Abund     | Formula                                                                      | Ion      |
|-----------|-----------|-----------|---|-----------|------------------------------------------------------------------------------|----------|
| 249.60653 | 249.60662 | -0.37     | 2 | 7637.68   | C <sub>24</sub> H <sub>25</sub> F <sub>2</sub> N <sub>7</sub> O <sub>3</sub> | (M+2H)+2 |
| 250.11133 | 250.10804 | 13.14     | 2 | 1938.11   | C <sub>24</sub> H <sub>25</sub> F <sub>2</sub> N <sub>7</sub> O <sub>3</sub> | (M+2H)+2 |
| 250.60717 | 250.60935 | -8.69     | 2 | 380.05    | C <sub>24</sub> H <sub>25</sub> F <sub>2</sub> N <sub>7</sub> O <sub>3</sub> | (M+2H)+2 |
| 498.20662 | 498.20597 | 1.31      | 1 | 412028.53 | C <sub>24</sub> H <sub>25</sub> F <sub>2</sub> N <sub>7</sub> O <sub>3</sub> | (M+H)+   |
| 499.20935 | 499.2088  | 1.09      | 1 | 111505.13 | C <sub>24</sub> H <sub>25</sub> F <sub>2</sub> N <sub>7</sub> O <sub>3</sub> | (M+H)+   |
| 500.21156 | 500.21142 | 0.27      | 1 | 17153.88  | C <sub>24</sub> H <sub>25</sub> F <sub>2</sub> N <sub>7</sub> O <sub>3</sub> | (M+H)+   |

--- End Of Report ---

### Compound 45

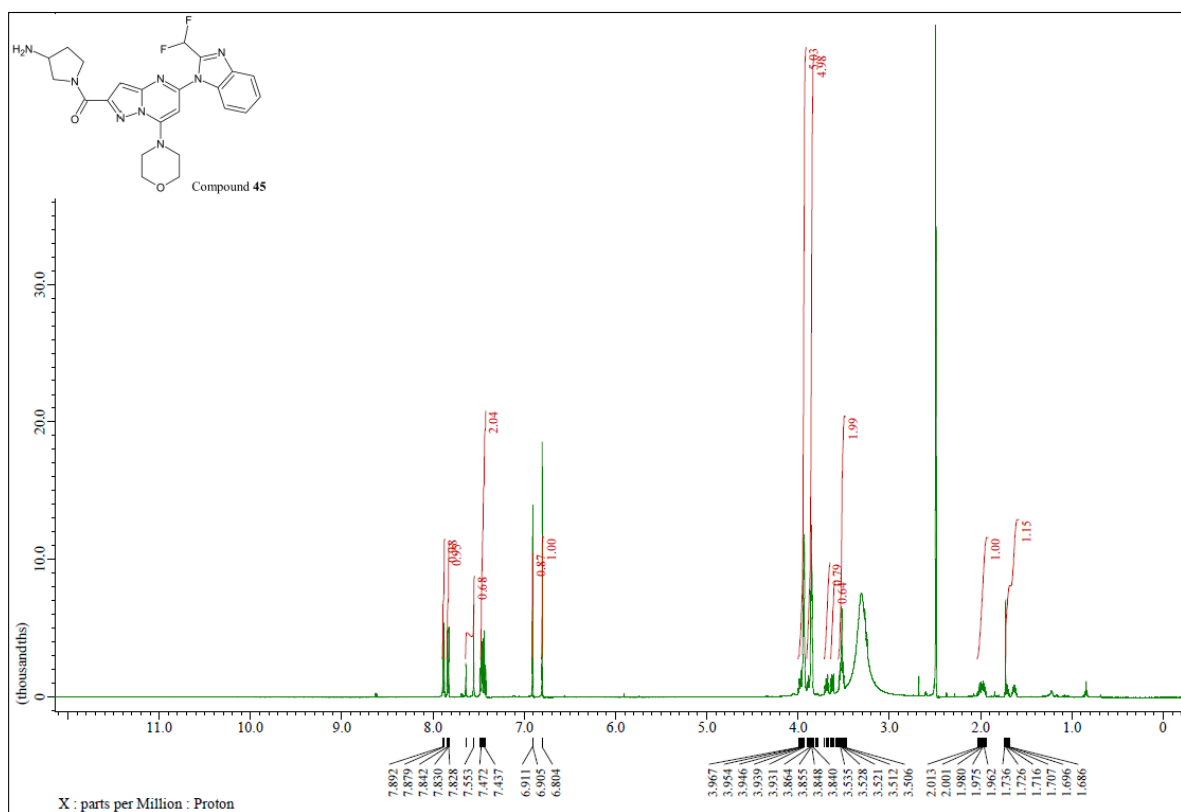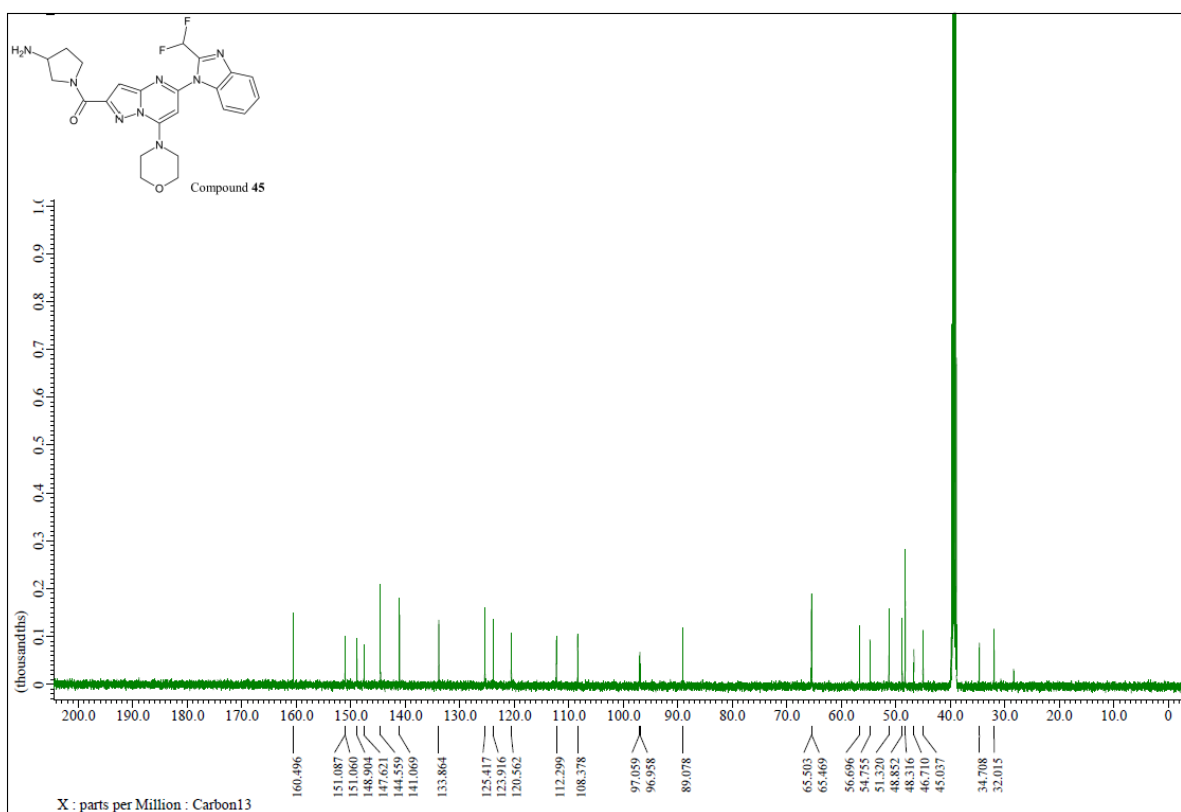

## Compound 45

| Name        | Obs. m/z | Obs. RT | Obs. Mass | Tgt Formula      | Tgt Mass | Tgt Mass Error | Find Cpd<br>Alaorit<br>Find by<br>Formula |
|-------------|----------|---------|-----------|------------------|----------|----------------|-------------------------------------------|
| Compound 45 | 505.1876 | 1.14    | 482.1996  | C23 H24 F2 N8 O2 | 482.199  | 1.11           |                                           |

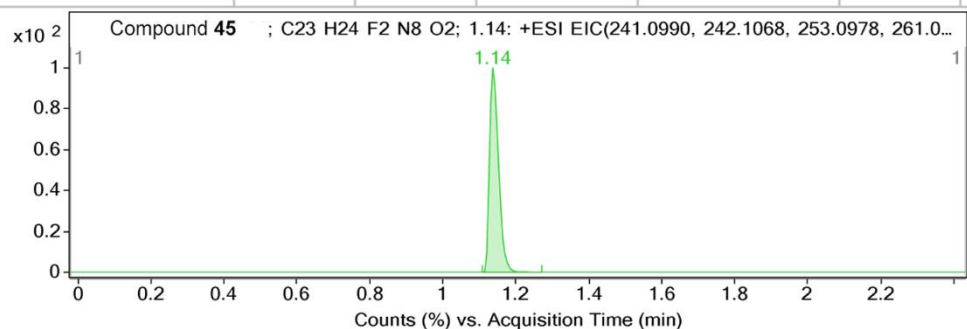

MS Zoomed Spectrum

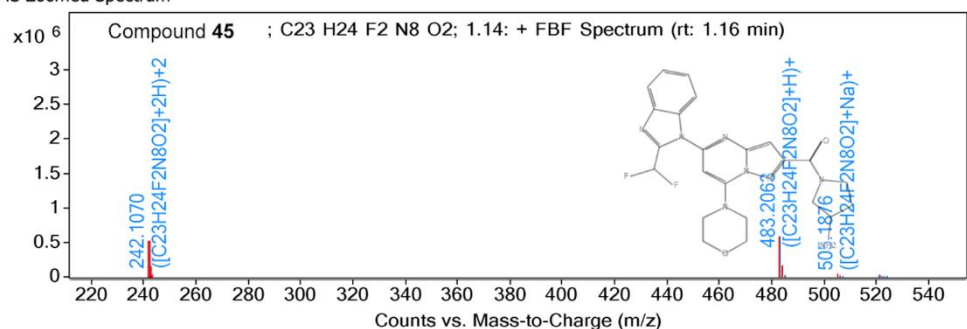

MS Zoomed Spectrum

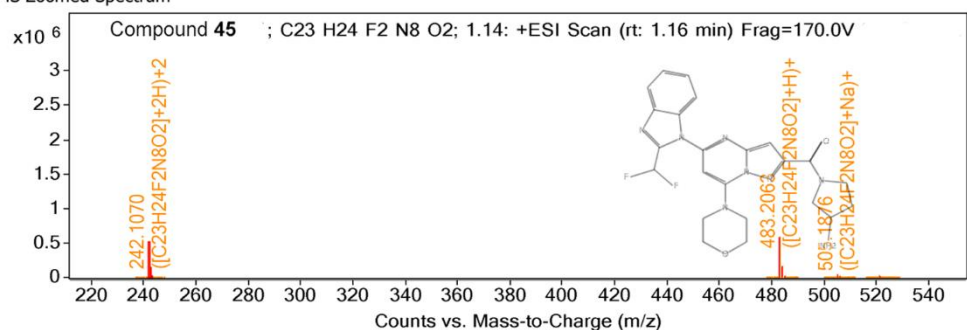

MS Spectrum Peak List

| Obs. m/z | Charge | Abund     | Formula      | Ion/Isotope | Tgt Mass Error (ppm) |
|----------|--------|-----------|--------------|-------------|----------------------|
| 242.107  | 2      | 512912.66 | C23H24F2N8O2 | (M+2H)+2    |                      |
| 242.6087 | 2      | 129371.14 | C23H24F2N8O2 | (M+2H)+2    |                      |
| 243.1117 | 2      | 17811.2   | C23H24F2N8O2 | (M+2H)+2    |                      |
| 483.2063 | 1      | 585879.56 | C23H24F2N8O2 | (M+H)+      |                      |
| 484.2113 | 1      | 161792.5  | C23H24F2N8O2 | (M+H)+      |                      |
| 485.2155 | 1      | 23468.76  | C23H24F2N8O2 | (M+H)+      |                      |
| 505.1876 | 1      | 42200.06  | C23H24F2N8O2 | (M+Na)+     |                      |
| 506.1906 | 1      | 12088.44  | C23H24F2N8O2 | (M+Na)+     |                      |
| 521.1614 | 1      | 26443.12  | C23H24F2N8O2 | (M+K)+      |                      |
| 522.164  | 1      | 7111.54   | C23H24F2N8O2 | (M+K)+      |                      |
| 242.107  | 2      | 512912.66 | C23H24F2N8O2 | (M+2H)+2    | 0.88                 |
| 242.6087 | 2      | 129371.14 | C23H24F2N8O2 | (M+2H)+2    | 2.24                 |
| 243.1117 | 2      | 17811.2   | C23H24F2N8O2 | (M+2H)+2    | 9.44                 |
| 483.2063 | 1      | 585879.56 | C23H24F2N8O2 | (M+H)+      | -0.06                |
| 484.2113 | 1      | 161792.5  | C23H24F2N8O2 | (M+H)+      | 4.6                  |
| 485.2155 | 1      | 23468.76  | C23H24F2N8O2 | (M+H)+      | 7.94                 |
| 505.1876 | 1      | 42200.06  | C23H24F2N8O2 | (M+Na)+     | -1.34                |
| 506.1906 | 1      | 12088.44  | C23H24F2N8O2 | (M+Na)+     | -0.77                |
| 521.1614 | 1      | 26443.12  | C23H24F2N8O2 | (M+K)+      | -1.6                 |
| 522.164  | 1      | 7111.54   | C23H24F2N8O2 | (M+K)+      | -1.83                |

--- End Of Report ---



# Compound 46

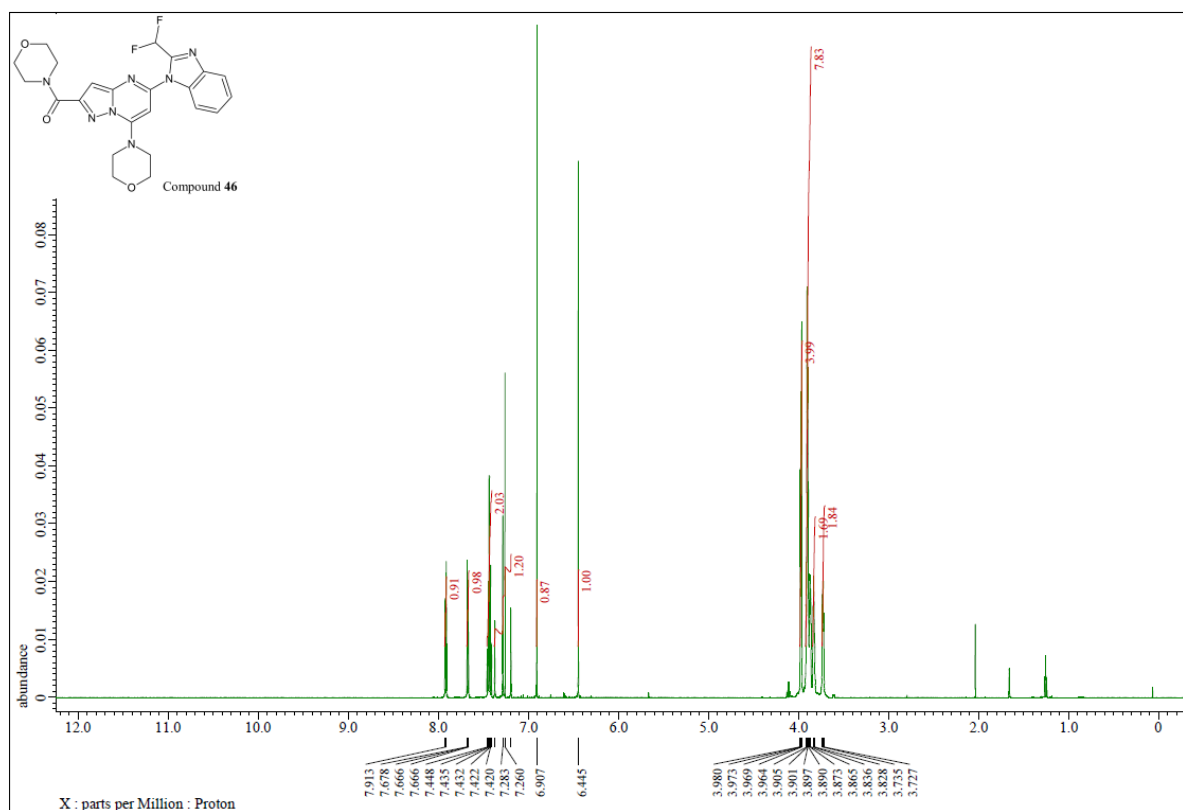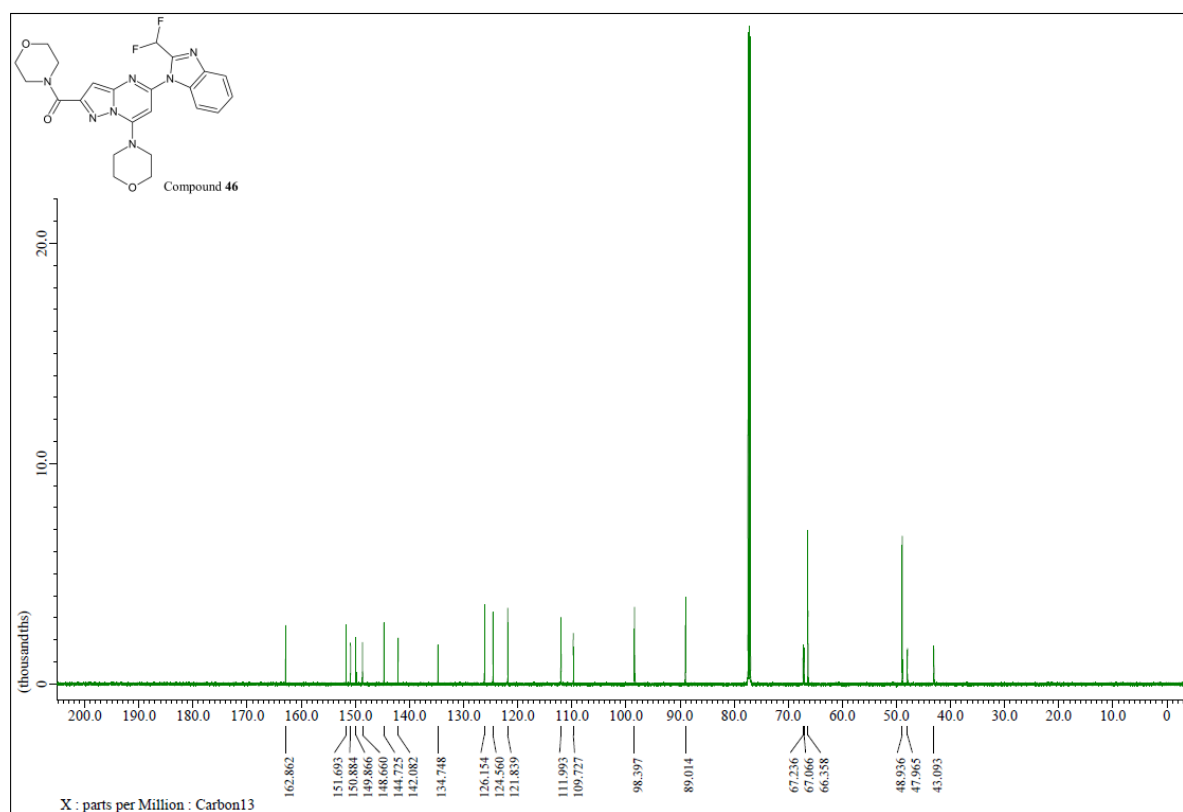

## Compound 46

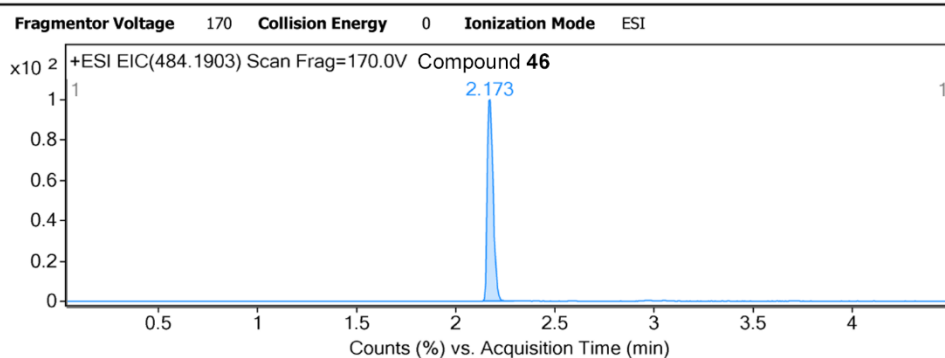

### Integration Peak List

| Peak | Start | RT    | End   | Height     | Area       | Area % |
|------|-------|-------|-------|------------|------------|--------|
| 1    | 2.135 | 2.173 | 2.295 | 3035891.34 | 6209015.39 | 100    |

### Spectra

Spectrum Source Peak (1) in "+ EIC(484.1903) Scan" Fragmentor Voltage 170 Collision Energy 0 Ionization Mode ESI

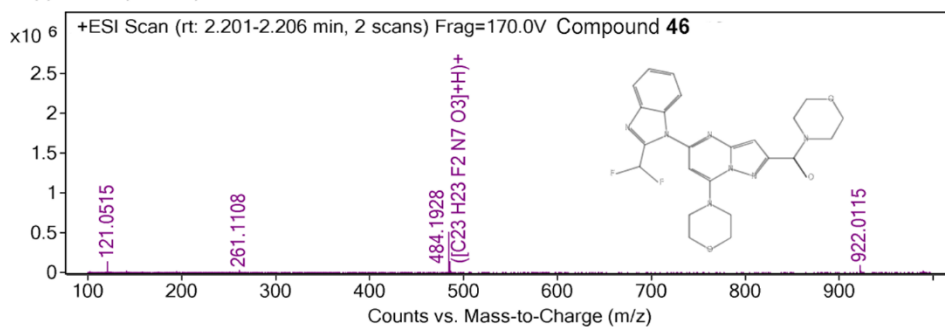

### Peak List

| m/z      | z | Abund     | Name        | Formula          | Ion    | Score (DB) | Hits (DB) |
|----------|---|-----------|-------------|------------------|--------|------------|-----------|
| 484.1928 | 1 | 508306.75 | Compound 46 | C23 H23 F2 N7 O3 | (M+H)+ | 98.27      | 1         |

### Spectrum Structure

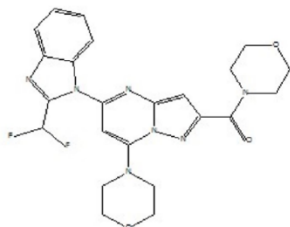

--- End Of Report ---

# Compound 47

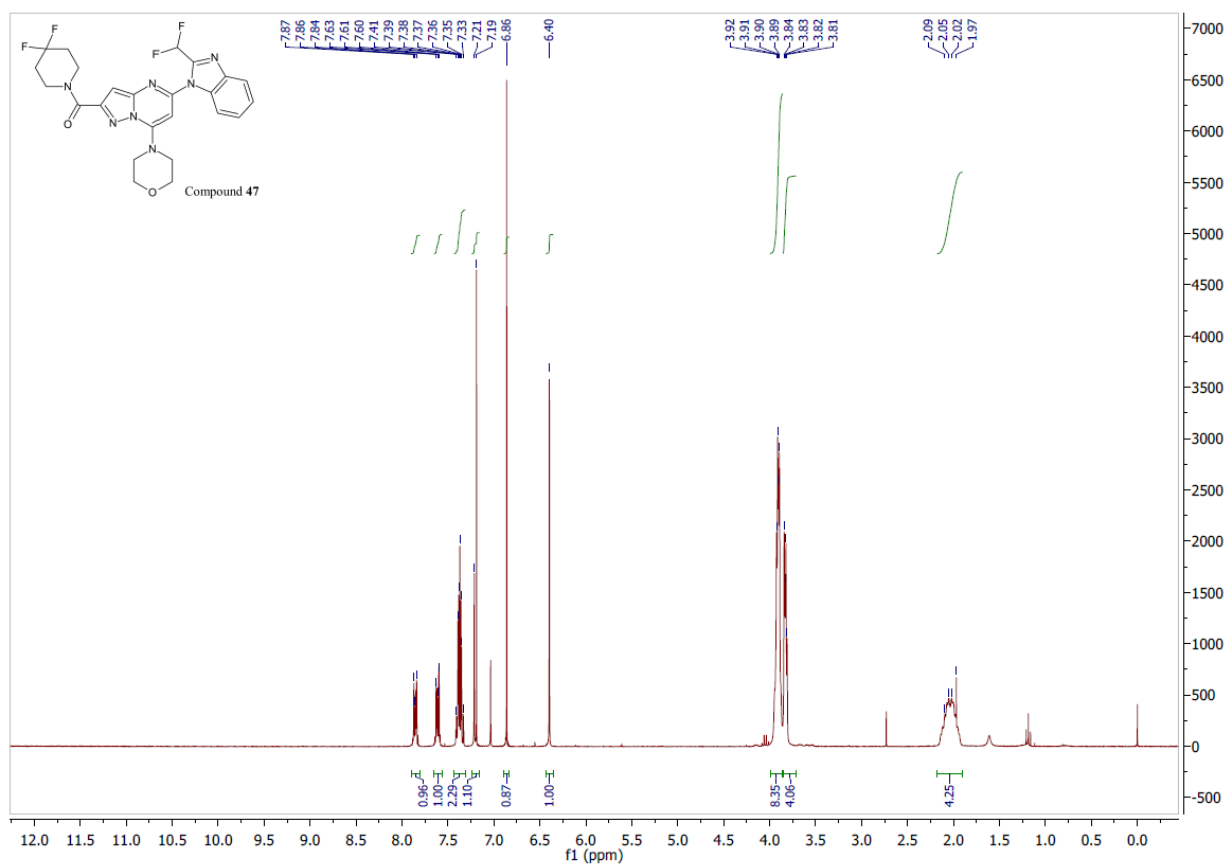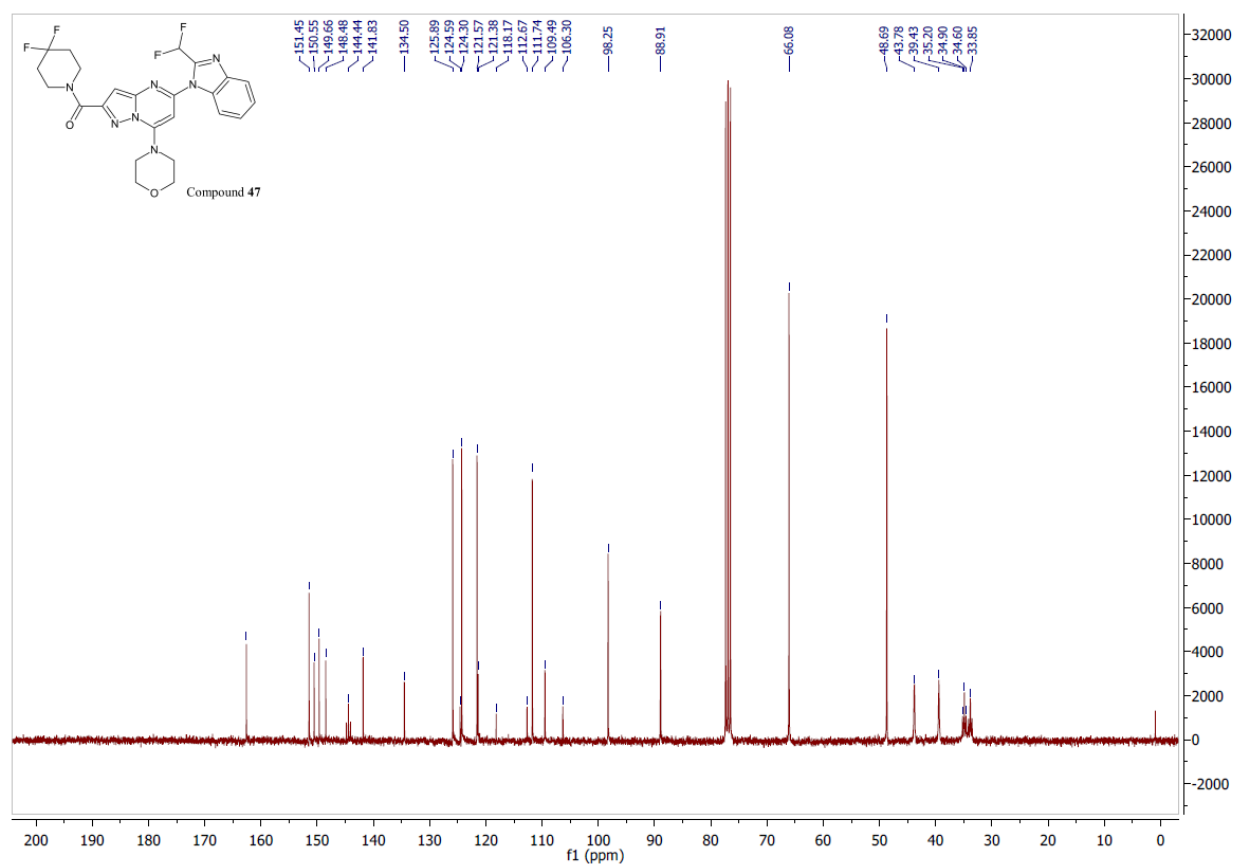

## Compound 47

| Name        | Obs. m/z | Obs. RT | Obs. Mass | Tgt Formula      | Tgt Mass | Tgt Mass Error | Find Cpds Algorit |
|-------------|----------|---------|-----------|------------------|----------|----------------|-------------------|
| Compound 47 | 540.1761 | 1.39    | 517.187   | C24 H23 F4 N7 O2 | 517.1849 | 4.06           | Find by Formula   |

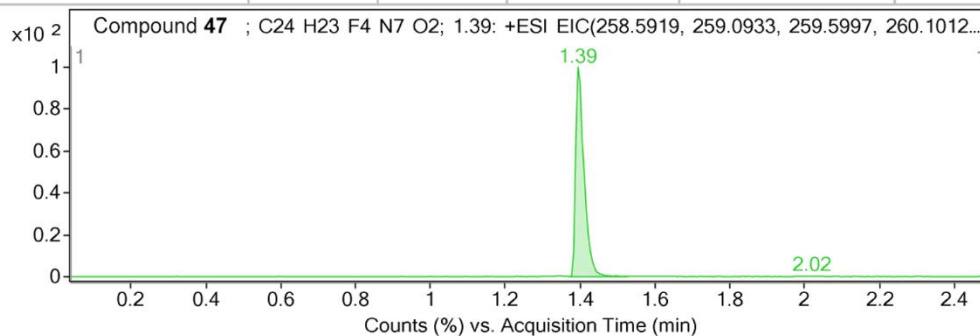

MS Zoomed Spectrum

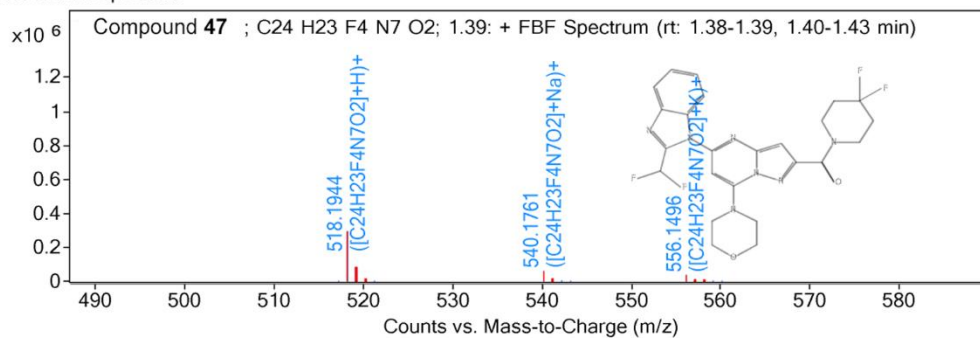

MS Zoomed Spectrum

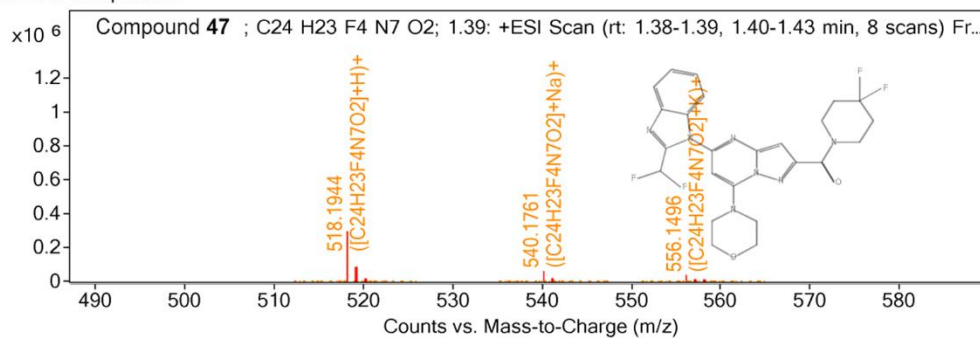

MS Spectrum Peak List

| Obs. m/z | Charge | Abund     | Formula      | Ion/Isotope | Tgt Mass Error (ppm) |
|----------|--------|-----------|--------------|-------------|----------------------|
| 518.1944 | 1      | 291918.13 | C24H23F4N7O2 | (M+H)+      |                      |
| 518.1944 | 1      | 291918.13 | C24H23F4N7O2 | (M+H)+      | 4.27                 |

--- End Of Report ---

# Compound 48

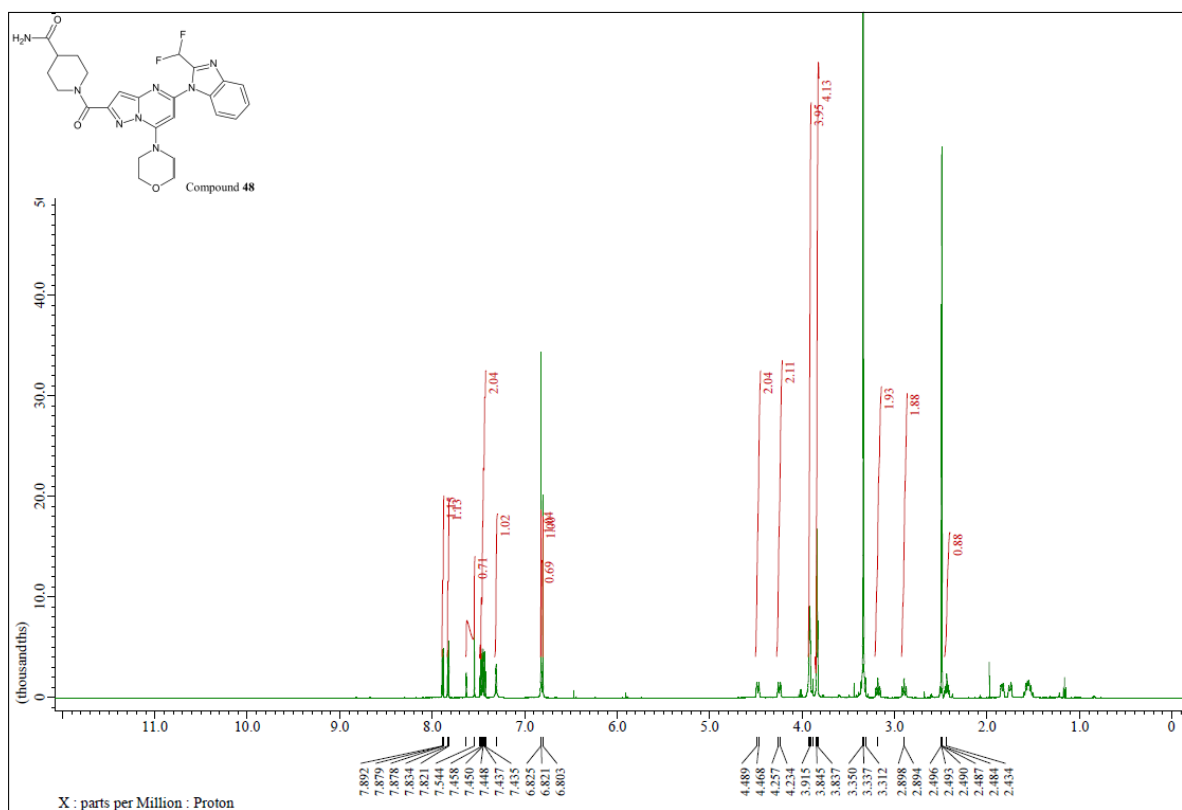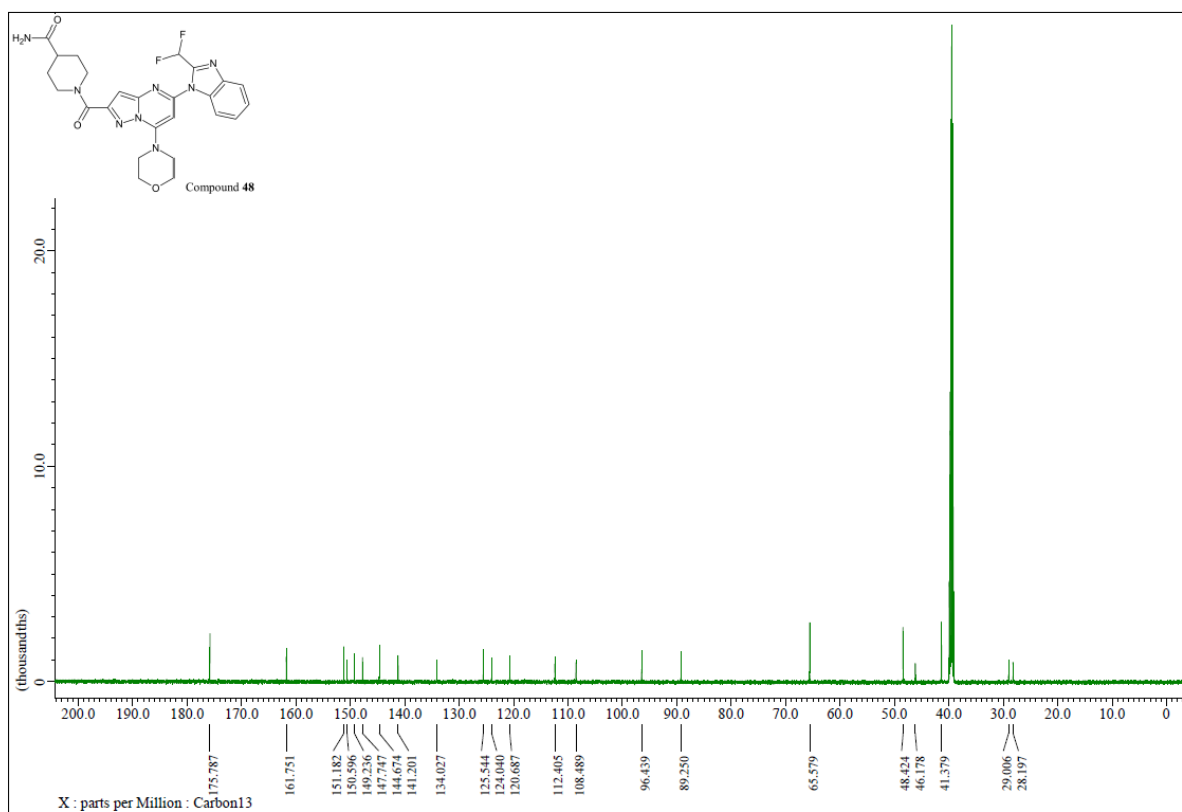

## Compound 48

| Name        | Obs. m/z | Obs. RT | Obs. Mass | Tgt Formula      | Tgt Mass | Tgt Mass Error | Find Cpd's Algorit |
|-------------|----------|---------|-----------|------------------|----------|----------------|--------------------|
| Compound 48 | 547.1994 | 1.921   | 524.2111  | C25 H26 F2 N8 O3 | 524.2096 | 2.9            | Find by Formula    |

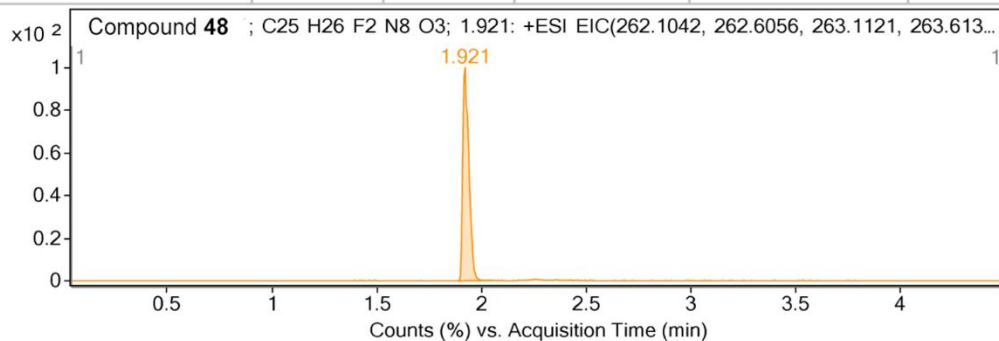

MS Zoomed Spectrum

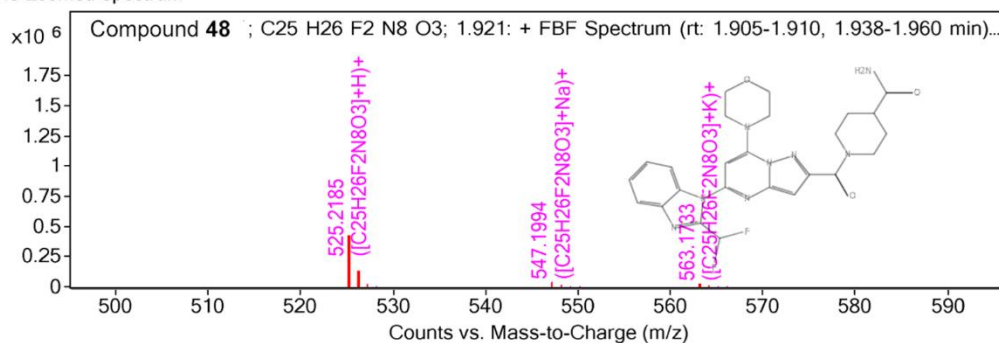

MS Zoomed Spectrum

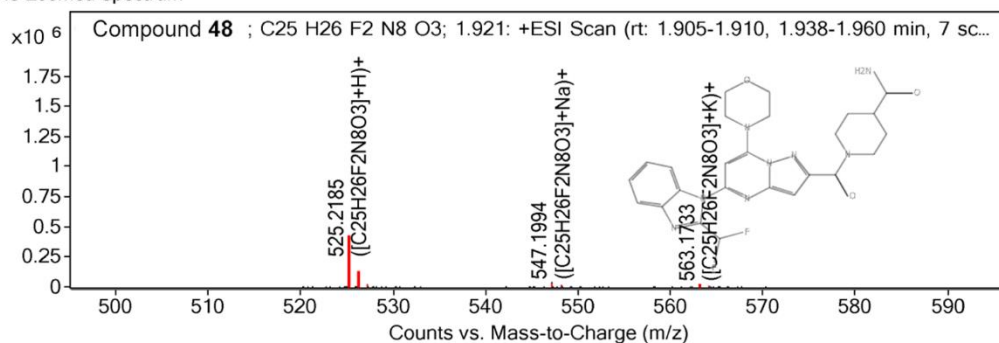

MS Spectrum Peak List

| Obs. m/z | Charge | Abund     | Formula      | Ion/Isotope | Tgt Mass Error (ppm) |
|----------|--------|-----------|--------------|-------------|----------------------|
| 525.2185 | 1      | 418105.22 | C25H26F2N8O3 | (M+H)+      |                      |
| 525.2185 | 1      | 418105.22 | C25H26F2N8O3 | (M+H)+      | 3.18                 |

--- End Of Report ---

# Compound 49

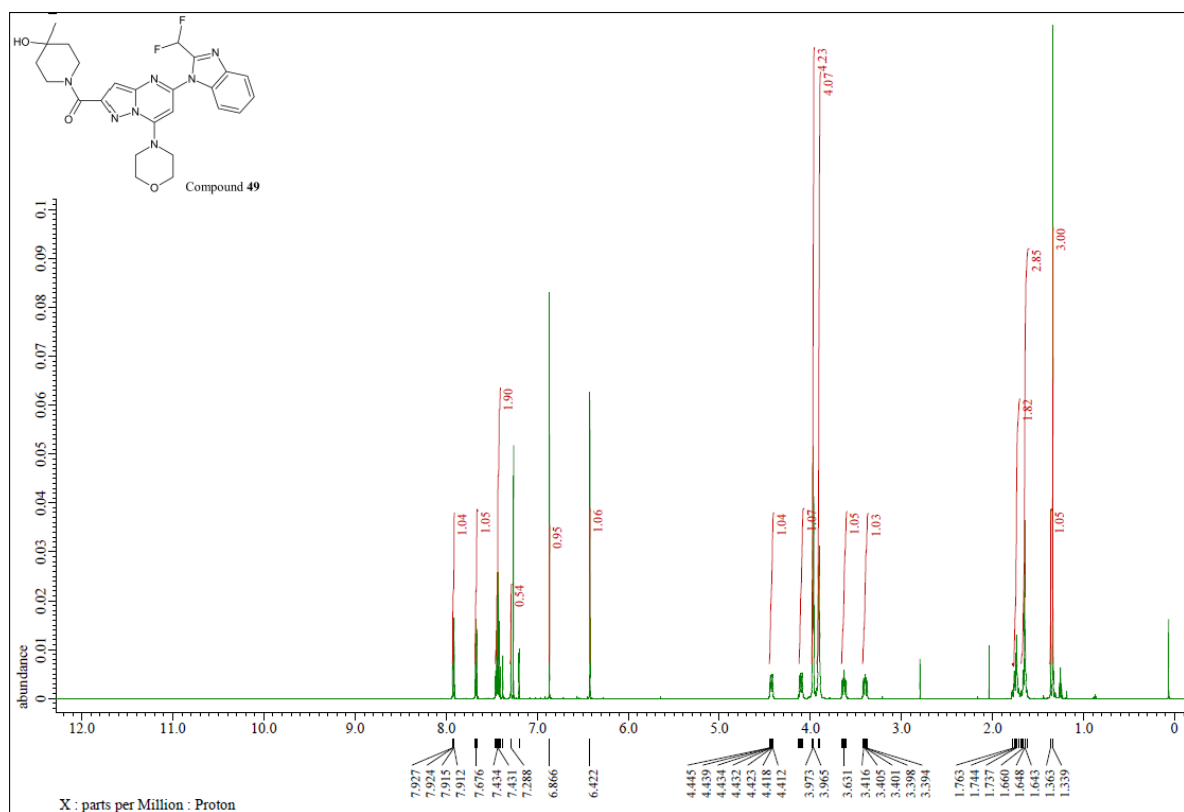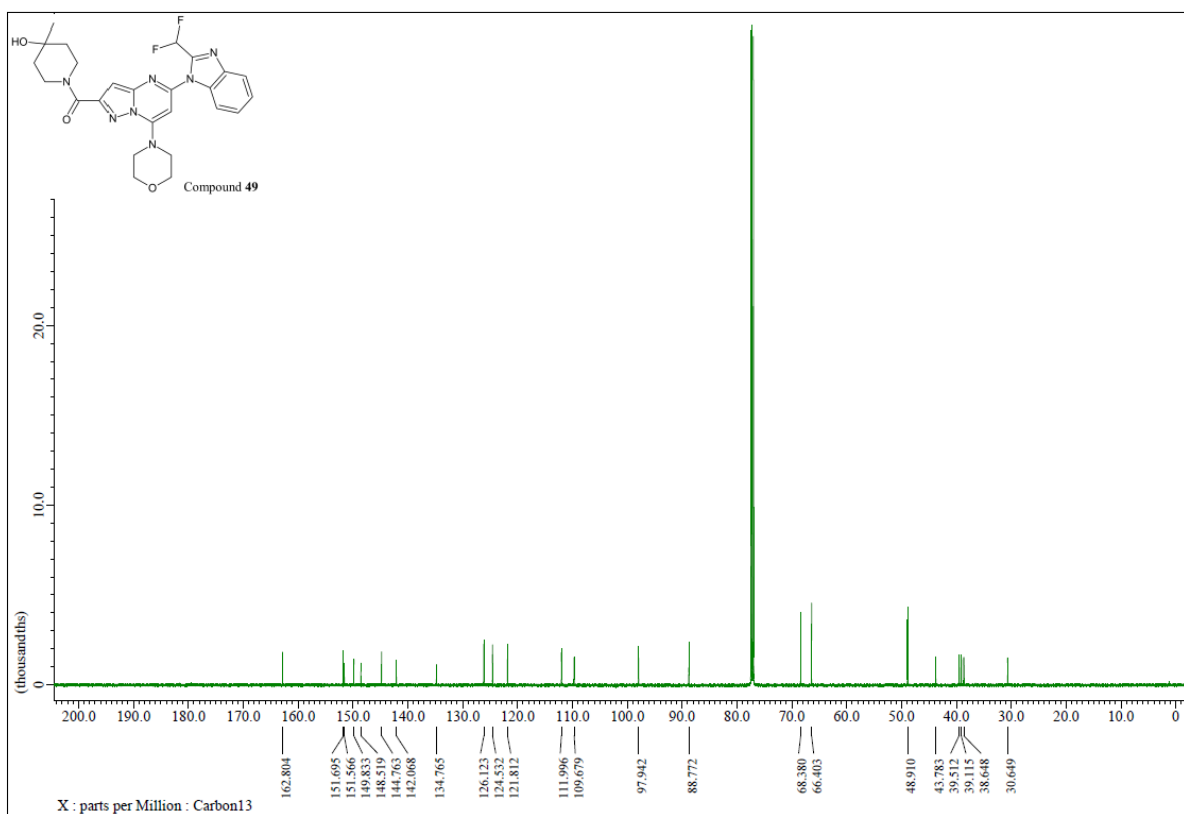

## Compound 49

| Name        | Obs. m/z | Obs. RT | Obs. Mass | Tgt Formula      | Tgt Mass | Tgt Mass Error | Find Cpds Algorit |
|-------------|----------|---------|-----------|------------------|----------|----------------|-------------------|
| Compound 49 | 534.2049 | 2.111   | 511.2166  | C25 H27 F2 N7 O3 | 511.2143 | 4.48           | Find by Formula   |

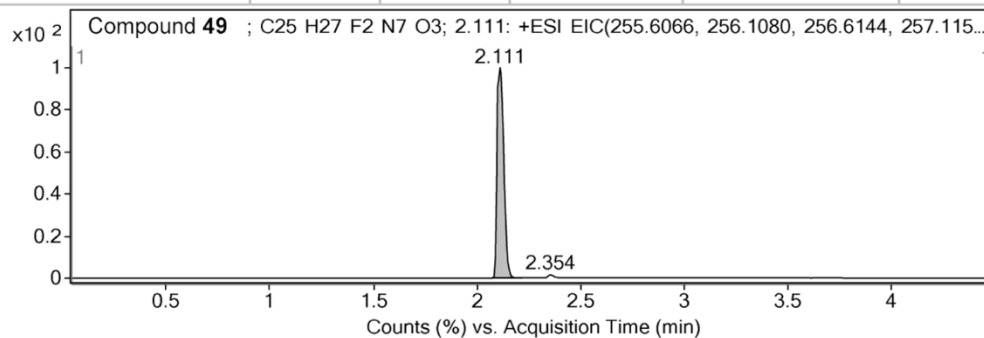

MS Zoomed Spectrum

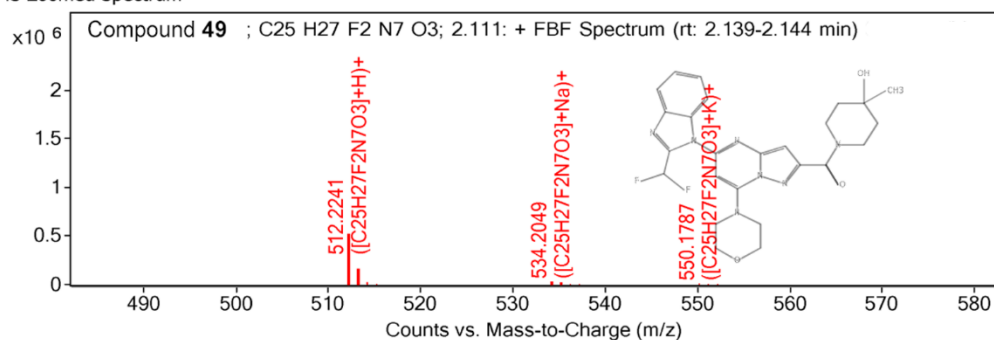

MS Zoomed Spectrum

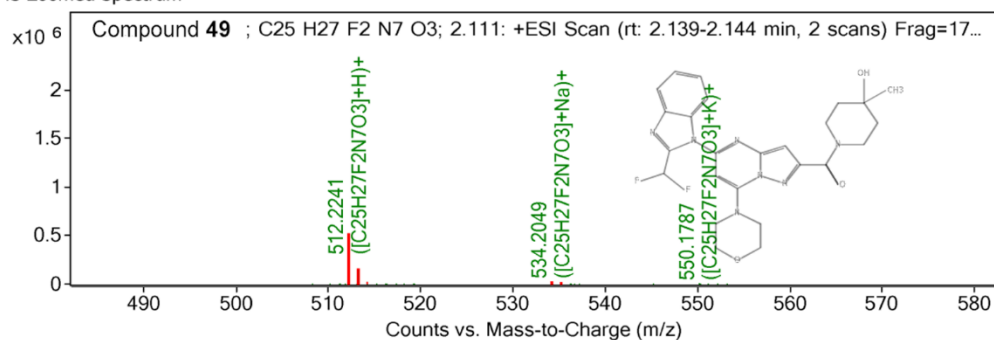

MS Spectrum Peak List

| Obs. m/z | Charge | Abund     | Formula      | Ion/Isotope | Tgt Mass Error (ppm) |
|----------|--------|-----------|--------------|-------------|----------------------|
| 512.2241 | 1      | 513087.13 | C25H27F2N7O3 | (M+H)+      |                      |
| 512.2241 | 1      | 513087.13 | C25H27F2N7O3 | (M+H)+      | 4.76                 |

--- End Of Report ---



# Compound 50

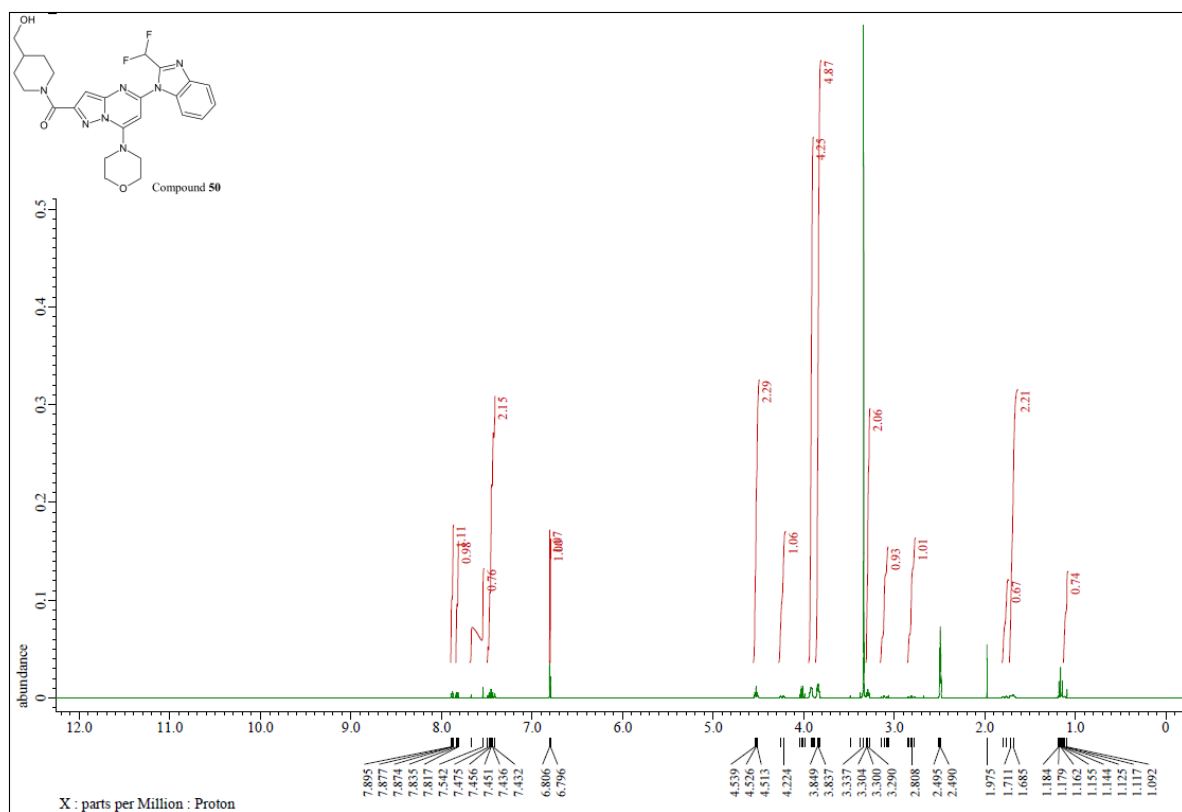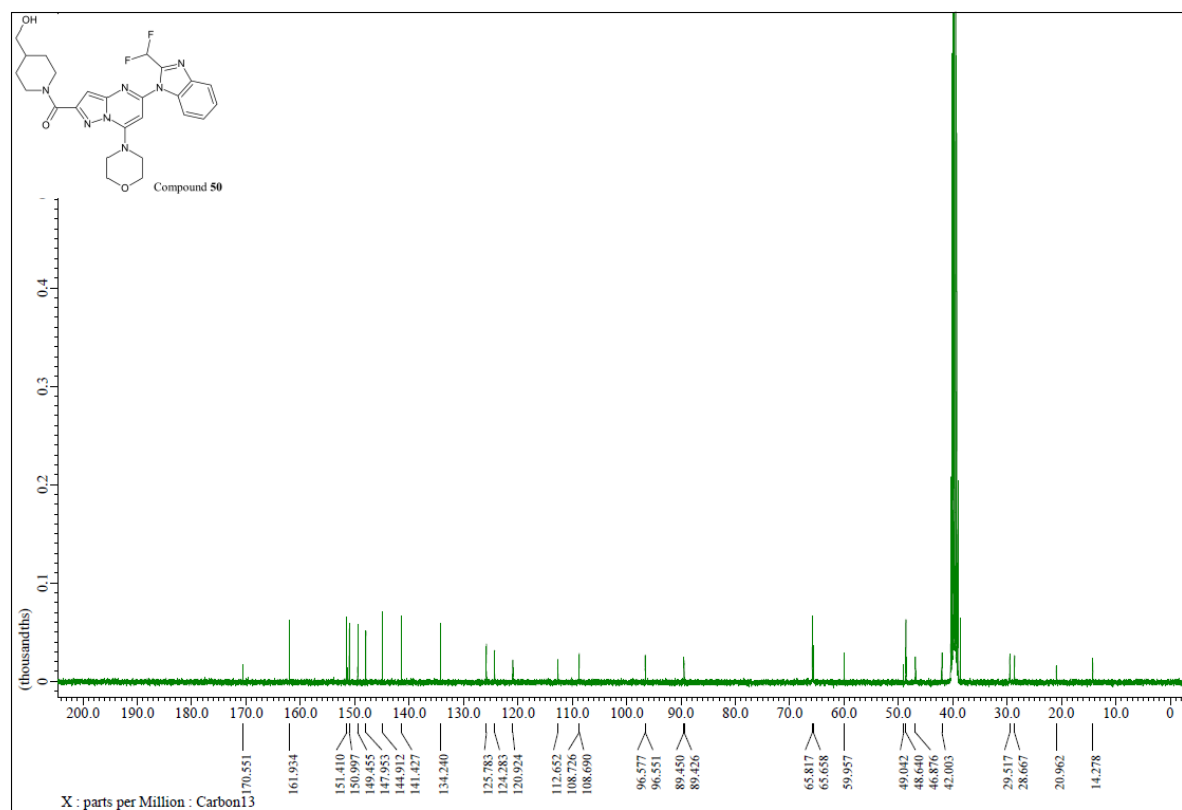

## Compound 50

| Name        | Obs. m/z | Obs. RT | Obs. Mass | Tgt Formula      | Tgt Mass | Tgt Mass Error | Find Cpd<br>Alaorit |
|-------------|----------|---------|-----------|------------------|----------|----------------|---------------------|
| Compound 50 | 534.2048 | 2.061   | 511.2169  | C25 H27 F2 N7 O3 | 511.2143 | 4.98           | Find by<br>Formula  |

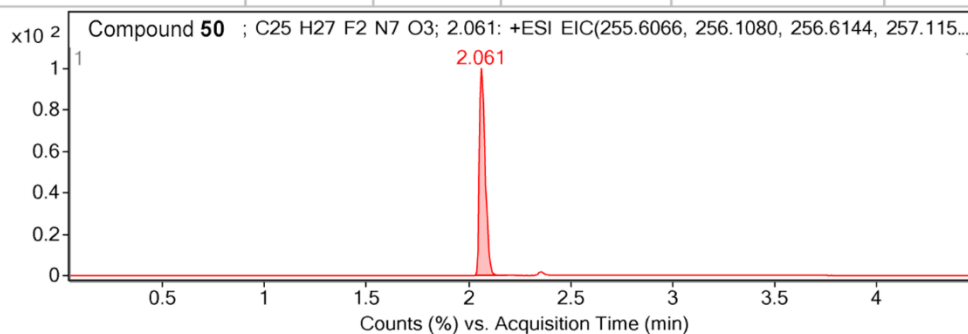

MS Zoomed Spectrum

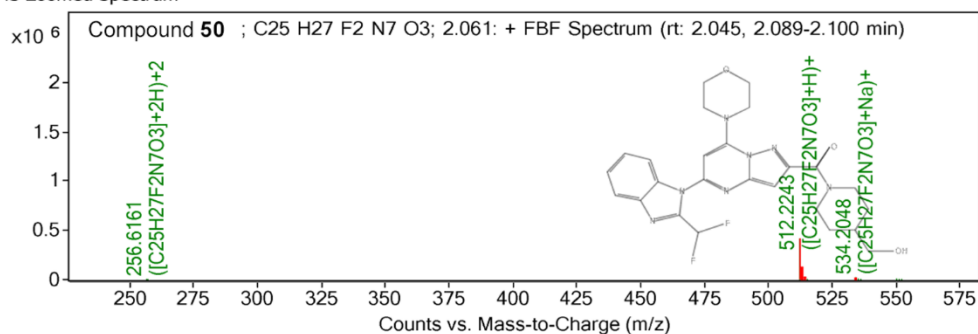

MS Zoomed Spectrum

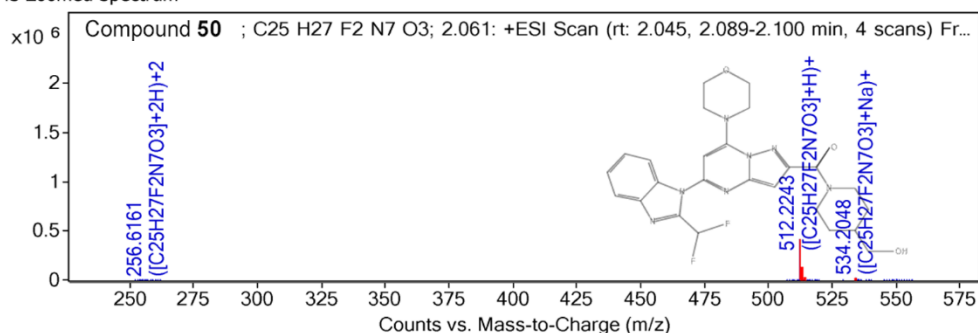

MS Spectrum Peak List

| Obs. m/z | Charge | Abund     | Formula      | Ion/Isotope | Tgt Mass Error (ppm) |
|----------|--------|-----------|--------------|-------------|----------------------|
| 512.2243 | 1      | 414545.78 | C25H27F2N7O3 | (M+H)+      |                      |
| 512.2243 | 1      | 414545.78 | C25H27F2N7O3 | (M+H)+      | 5.32                 |

--- End Of Report ---

# Compound 51

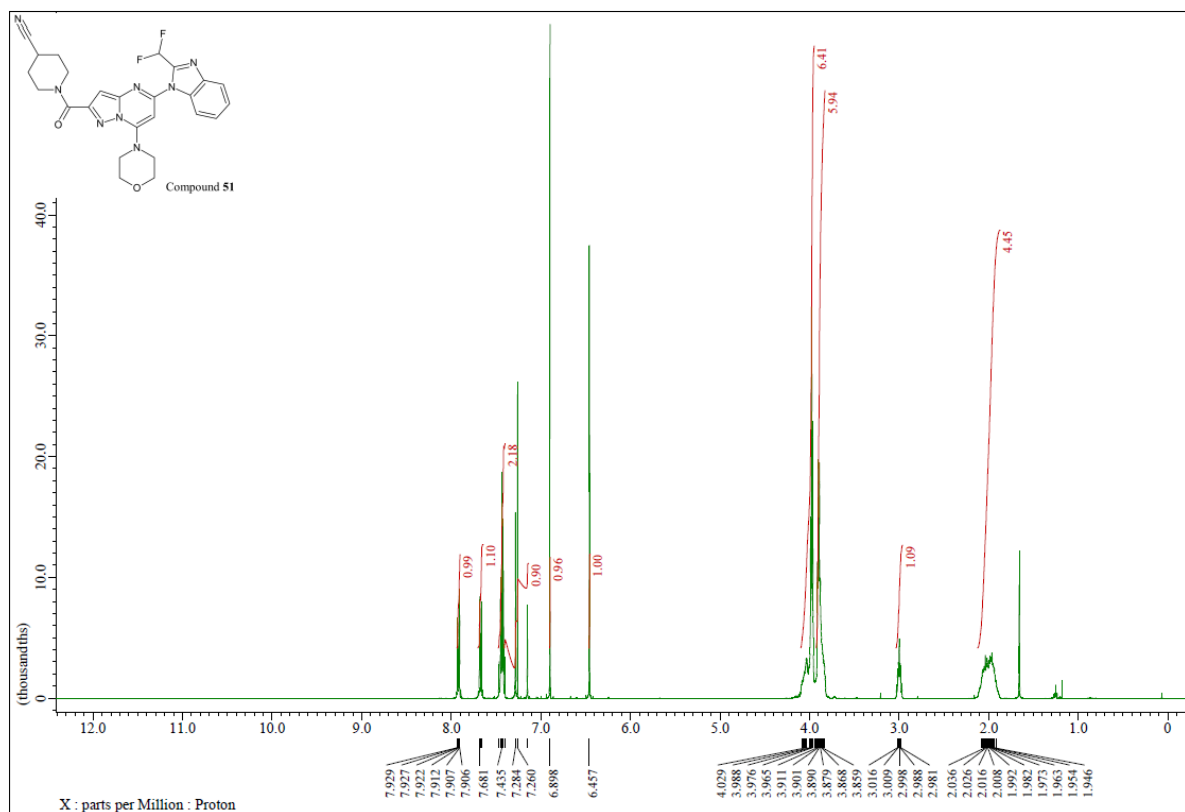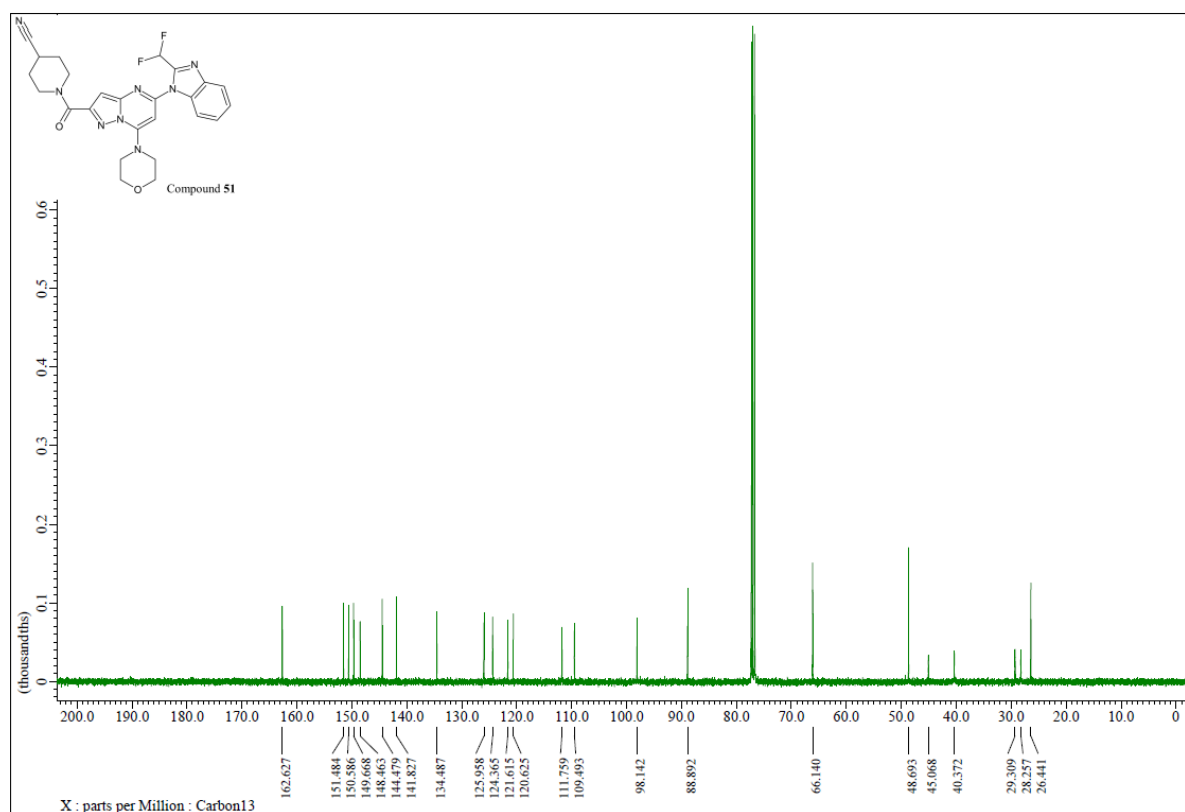

## Compound 51

| Name        | Obs. m/z | Obs. RT | Obs. Mass | Tgt Formula   | Tgt Mass | Tgt Mass Error | Find Cpds Algorithm |
|-------------|----------|---------|-----------|---------------|----------|----------------|---------------------|
| Compound 51 | 245.1528 | 2.343   | 488.2908  | C28 H36 N6 O2 | 488.29   | 1.65           | Find by Formula     |

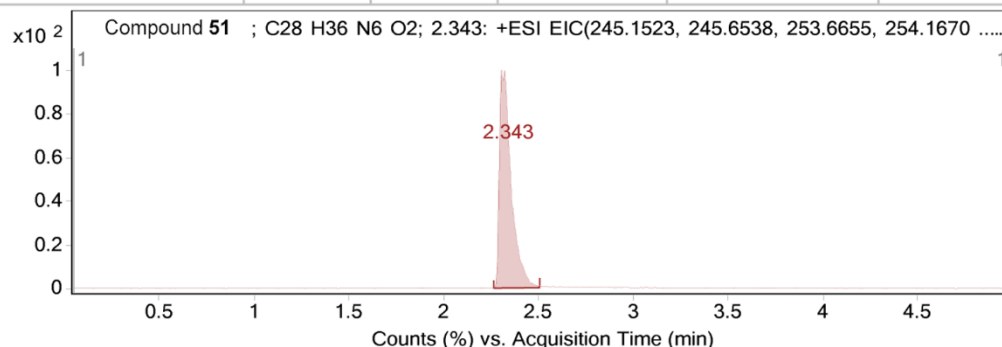

MS Zoomed Spectrum

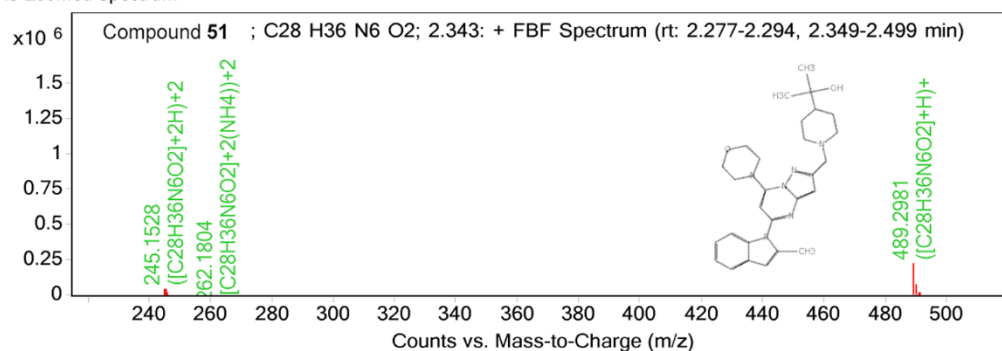

MS Zoomed Spectrum

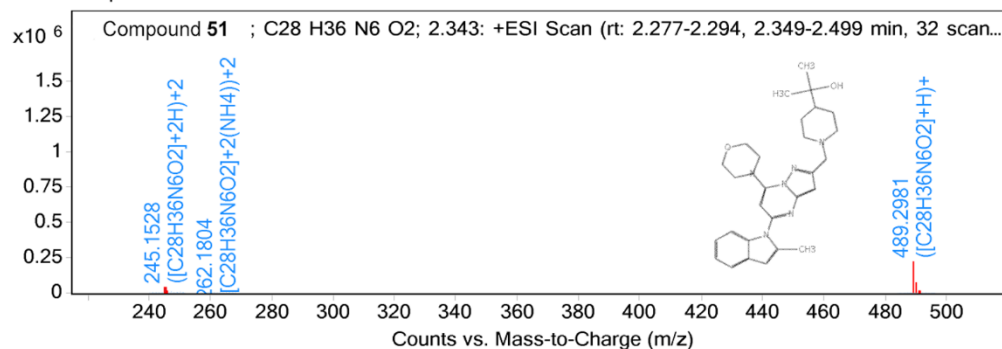

MS Spectrum Peak List

| Obs. m/z | Charge | Abund     | Formula    | Ion/Isotope  | Tgt Mass Error (ppm) |
|----------|--------|-----------|------------|--------------|----------------------|
| 245.1528 | 2      | 39305.1   | C28H36N6O2 | (M+2H)+2     |                      |
| 245.6541 | 2      | 13220.31  | C28H36N6O2 | (M+2H)+2     |                      |
| 246.1556 | 2      | 2237.2    | C28H36N6O2 | (M+2H)+2     |                      |
| 246.656  | 2      | 264.83    | C28H36N6O2 | (M+2H)+2     |                      |
| 262.1804 | 2      | 2396.03   | C28H36N6O2 | (M+2(NH4))+2 |                      |
| 263.1846 | 2      | 484.19    | C28H36N6O2 | (M+2(NH4))+2 |                      |
| 489.2981 | 1      | 220426.55 | C28H36N6O2 | (M+H)+       |                      |
| 490.3008 | 1      | 64901.46  | C28H36N6O2 | (M+H)+       |                      |
| 491.3026 | 1      | 10140.32  | C28H36N6O2 | (M+H)+       |                      |
| 245.1528 | 2      | 39305.1   | C28H36N6O2 | (M+2H)+2     | 2.01                 |
| 245.6541 | 2      | 13220.31  | C28H36N6O2 | (M+2H)+2     | 1.29                 |
| 246.1556 | 2      | 2237.2    | C28H36N6O2 | (M+2H)+2     | 1.57                 |
| 246.656  | 2      | 264.83    | C28H36N6O2 | (M+2H)+2     | -2.37                |
| 262.1804 | 2      | 2396.03   | C28H36N6O2 | (M+2(NH4))+2 | 6                    |
| 263.1846 | 2      | 484.19    | C28H36N6O2 | (M+2(NH4))+2 | 11.24                |
| 489.2981 | 1      | 220426.55 | C28H36N6O2 | (M+H)+       | 1.78                 |
| 490.3008 | 1      | 64901.46  | C28H36N6O2 | (M+H)+       | 1.18                 |

# Compound 52

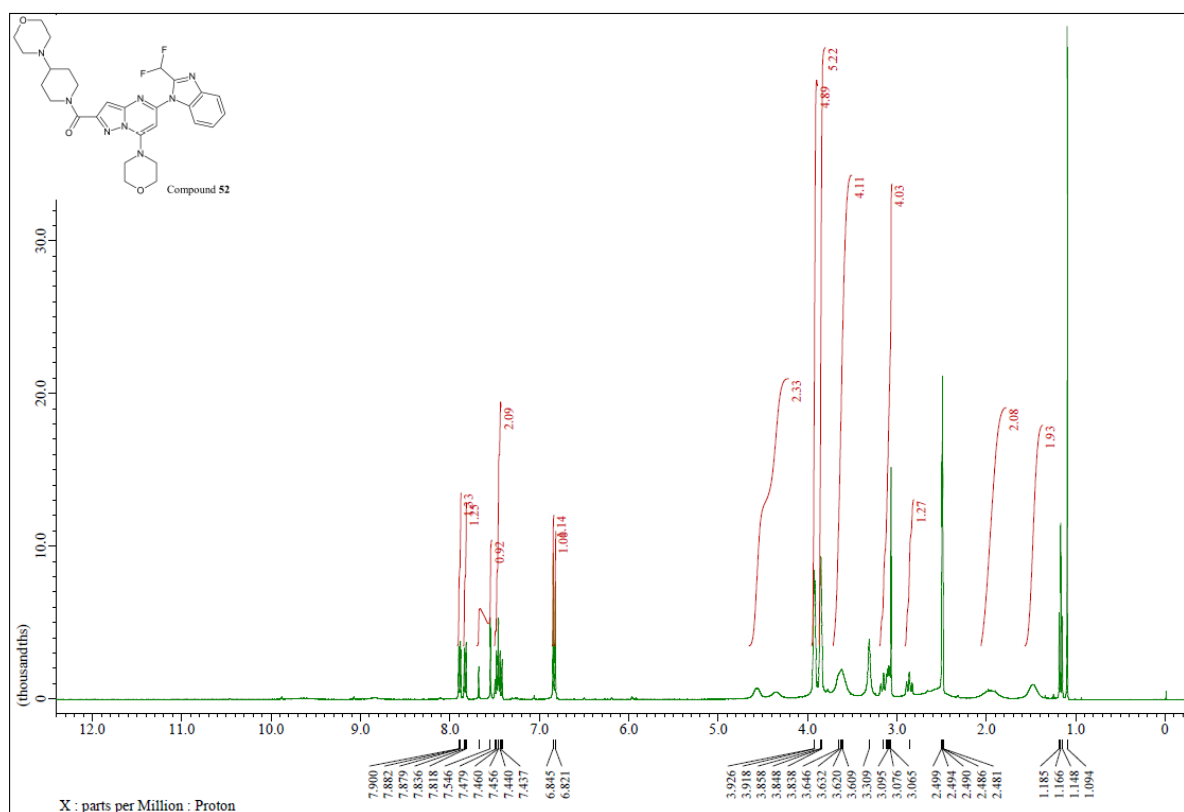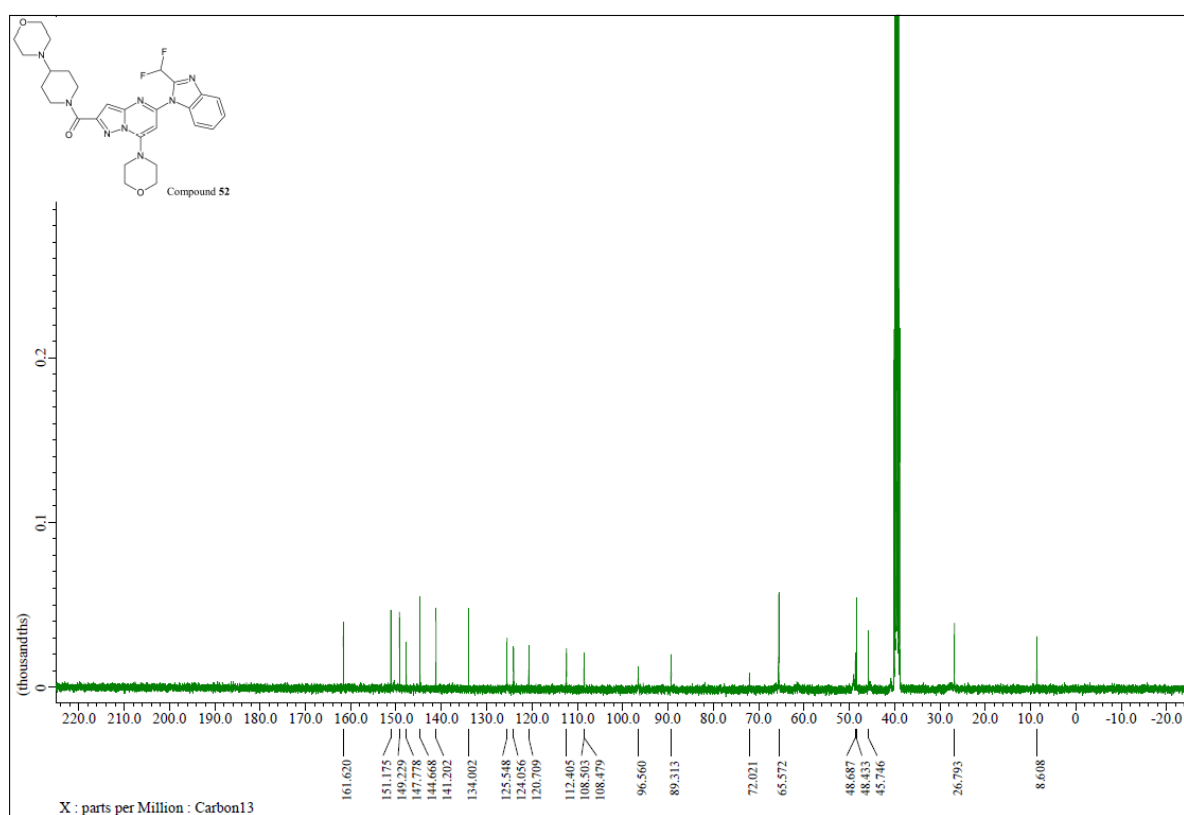

## Compound 52

| Name        | Obs. m/z | Obs. RT | Obs. Mass | Tgt Formula      | Tgt Mass | Tgt Mass Error | Find Cpds Alaorit |
|-------------|----------|---------|-----------|------------------|----------|----------------|-------------------|
| Compound 52 | 567.2635 | 1.715   | 566.2563  | C28 H32 F2 N8 O3 | 566.2565 | -0.37          | Find by Formula   |

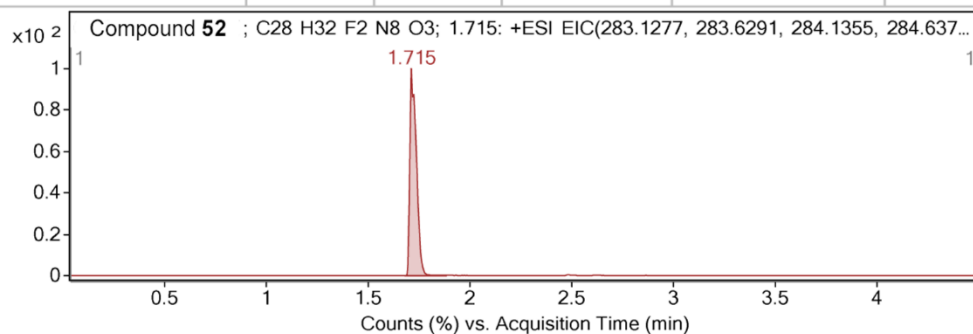

MS Zoomed Spectrum

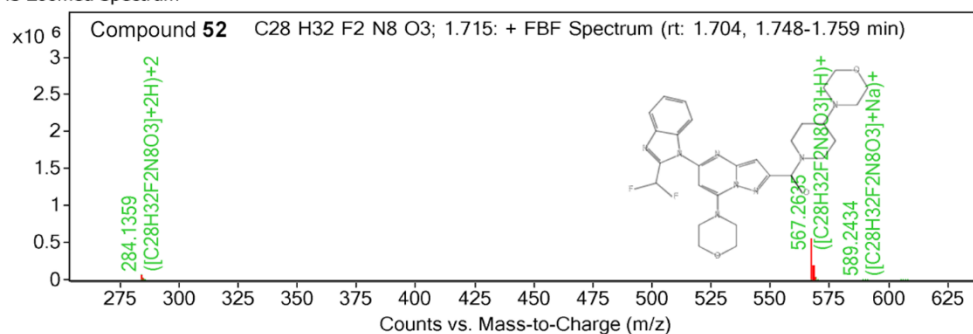

MS Zoomed Spectrum

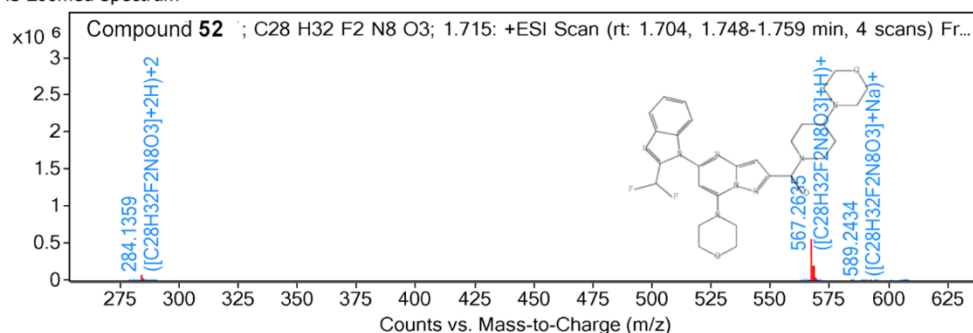

MS Spectrum Peak List

| Obs. m/z | Charge | Abund     | Formula      | Ion/Isotope | Tgt Mass Error (ppm) |
|----------|--------|-----------|--------------|-------------|----------------------|
| 567.2635 | 1      | 550689.94 | C28H32F2N8O3 | (M+H)+      |                      |
| 567.2635 | 1      | 550689.94 | C28H32F2N8O3 | (M+H)+      | -0.54                |

--- End Of Report ---

# Compound 53

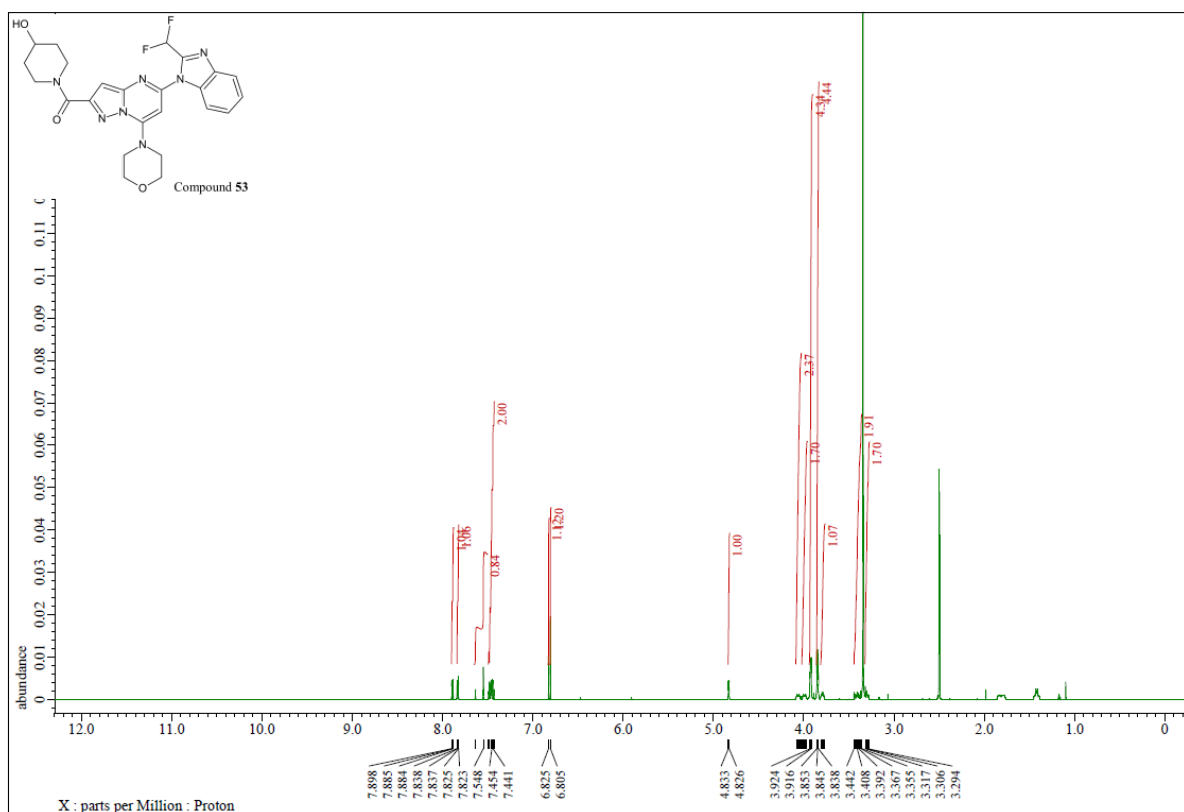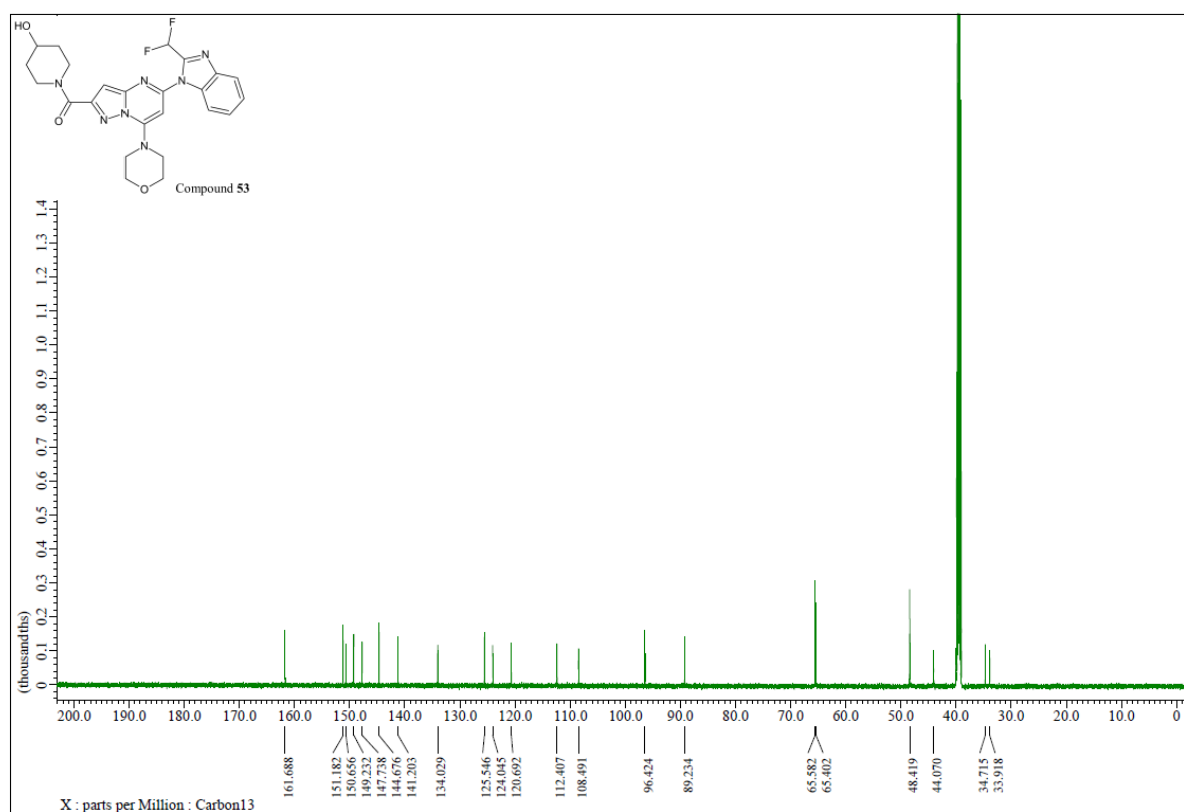

# Compound 53

| Name        | Obs. m/z  | Obs. RT | Obs. Mass | Tgt Formula      | Tgt Mass  | Tgt Mass Error | Find Cpds Algorit |
|-------------|-----------|---------|-----------|------------------|-----------|----------------|-------------------|
| Compound 53 | 256.12283 | 1.17    | 510.23062 | C25 H28 F2 N8 O2 | 510.23033 | 0.57           | Find by Formula   |

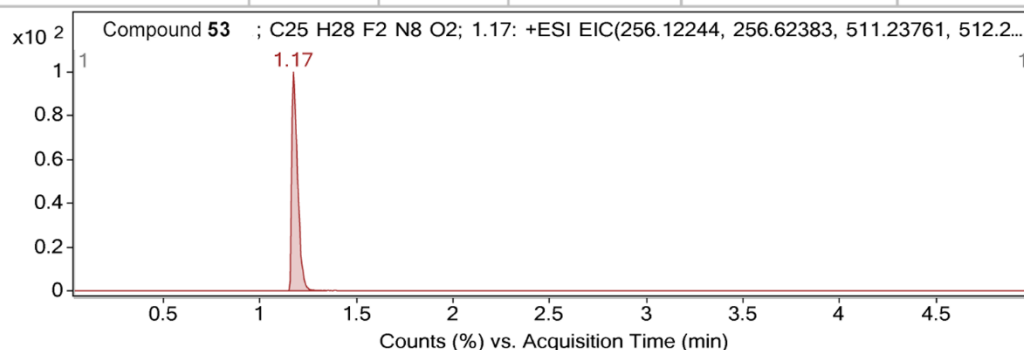

MS Zoomed Spectrum

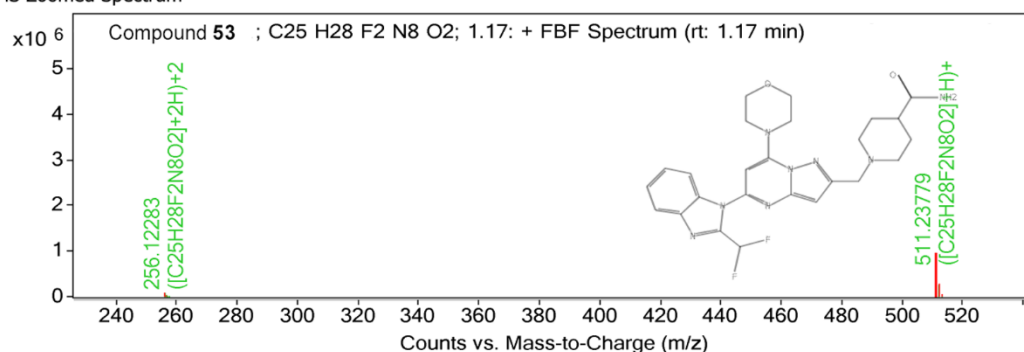

MS Zoomed Spectrum

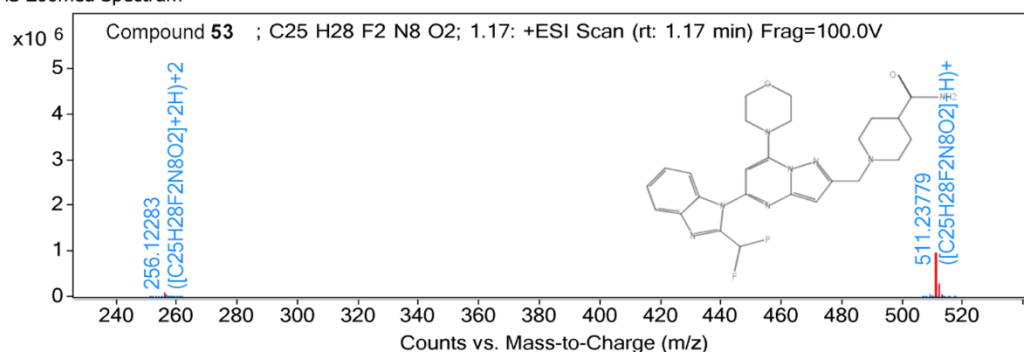

MS Spectrum Peak List

| Obs. m/z  | Charge | Abund     | Formula      | Ion/Isotope | Tgt Mass Error (ppm) |
|-----------|--------|-----------|--------------|-------------|----------------------|
| 256.12283 | 2      | 72301.37  | C25H28F2N8O2 | (M+2H)+2    |                      |
| 256.62429 | 2      | 24112.44  | C25H28F2N8O2 | (M+2H)+2    |                      |
| 257.12683 | 2      | 2715.31   | C25H28F2N8O2 | (M+2H)+2    |                      |
| 257.6261  | 2      | 442.92    | C25H28F2N8O2 | (M+2H)+2    |                      |
| 511.23779 | 1      | 947387.88 | C25H28F2N8O2 | (M+H)+      |                      |
| 512.24099 | 1      | 244045.55 | C25H28F2N8O2 | (M+H)+      |                      |
| 513.24241 | 1      | 39640.75  | C25H28F2N8O2 | (M+H)+      |                      |
| 256.12283 | 2      | 72301.37  | C25H28F2N8O2 | (M+2H)+2    | 1.52                 |
| 256.62429 | 2      | 24112.44  | C25H28F2N8O2 | (M+2H)+2    | 1.8                  |
| 257.12683 | 2      | 2715.31   | C25H28F2N8O2 | (M+2H)+2    | 6.5                  |
| 257.6261  | 2      | 442.92    | C25H28F2N8O2 | (M+2H)+2    | -1.28                |
| 511.23779 | 1      | 947387.88 | C25H28F2N8O2 | (M+H)+      | 0.36                 |
| 512.24099 | 1      | 244045.55 | C25H28F2N8O2 | (M+H)+      | 1.18                 |
| 513.24241 | 1      | 39640.75  | C25H28F2N8O2 | (M+H)+      | -1.22                |

--- End Of Report ---



# Compound 54

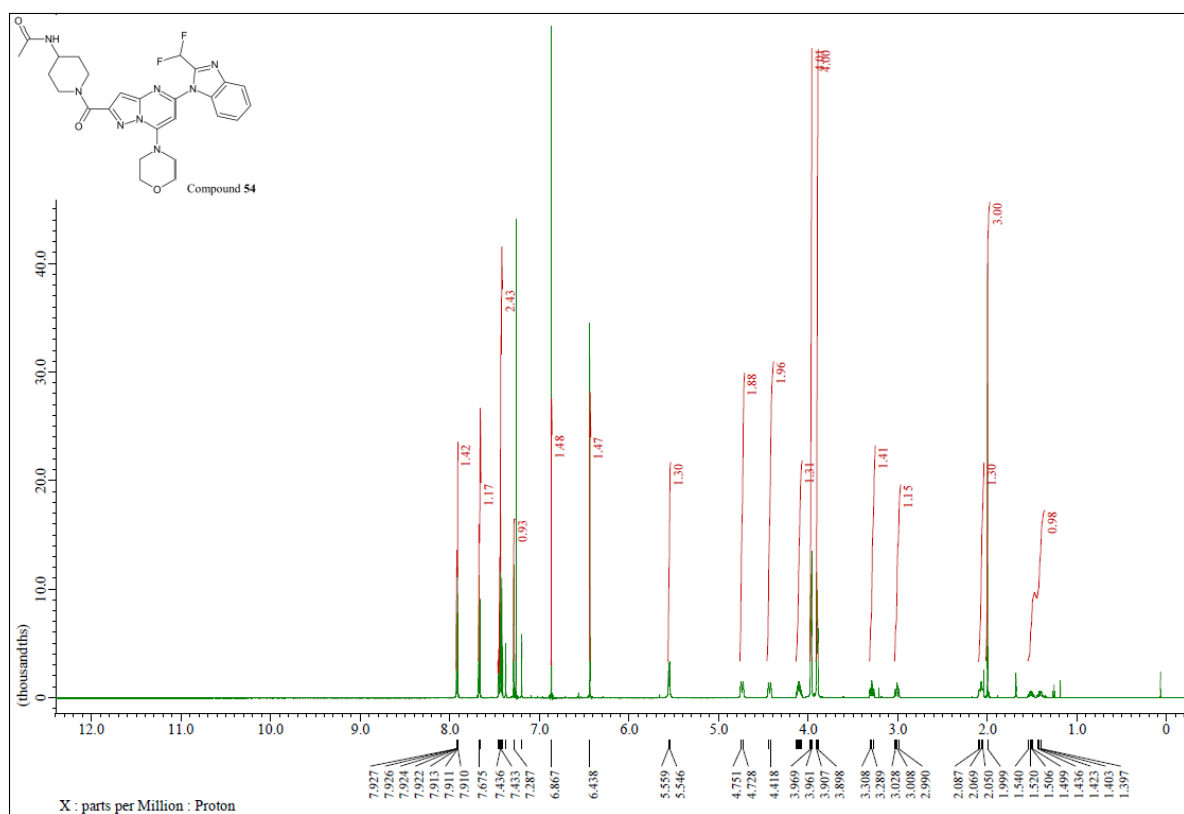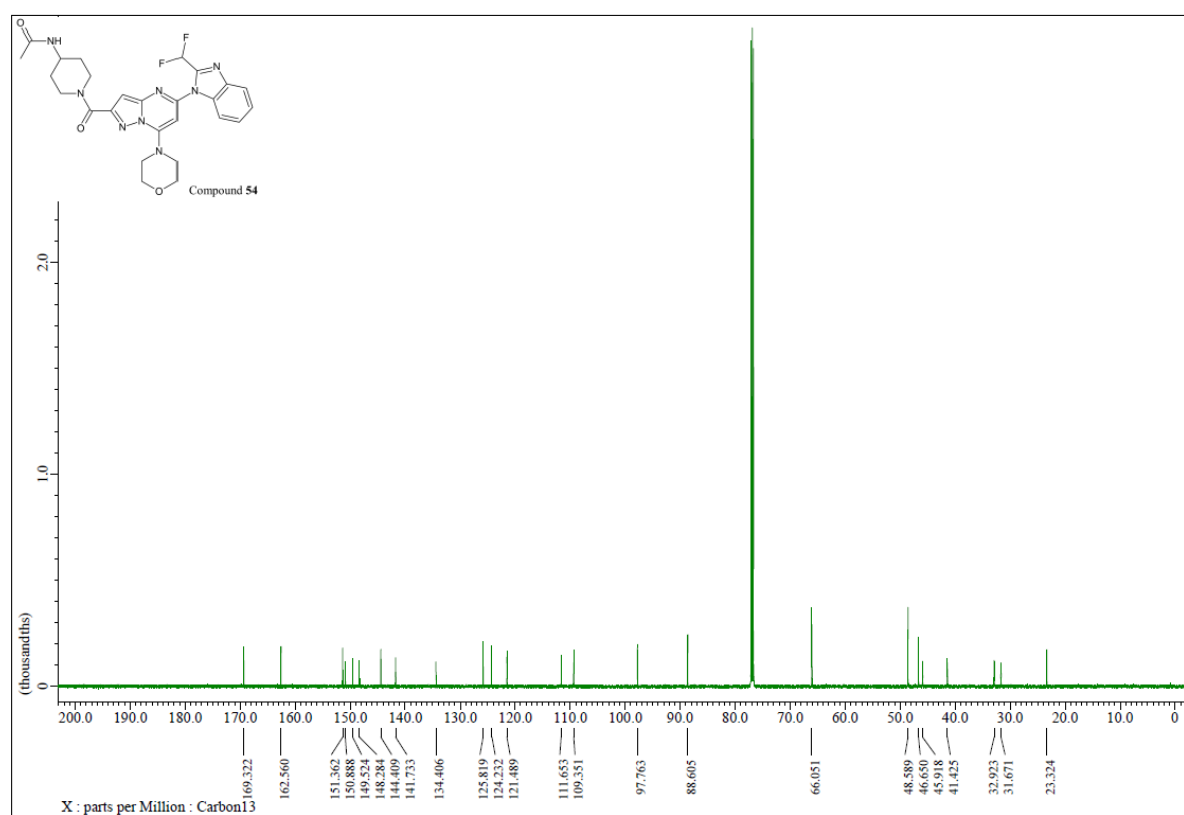

## Compound 54

| Name        | Obs. m/z | Obs. RT | Obs. Mass | Tgt Formula      | Tgt Mass | Tgt Mass Error | Find Cpds Alaorit |
|-------------|----------|---------|-----------|------------------|----------|----------------|-------------------|
| Compound 54 | 561.2167 | 1.24    | 538.2275  | C26 H28 F2 N8 O3 | 538.2252 | 4.19           | Find by Formula   |

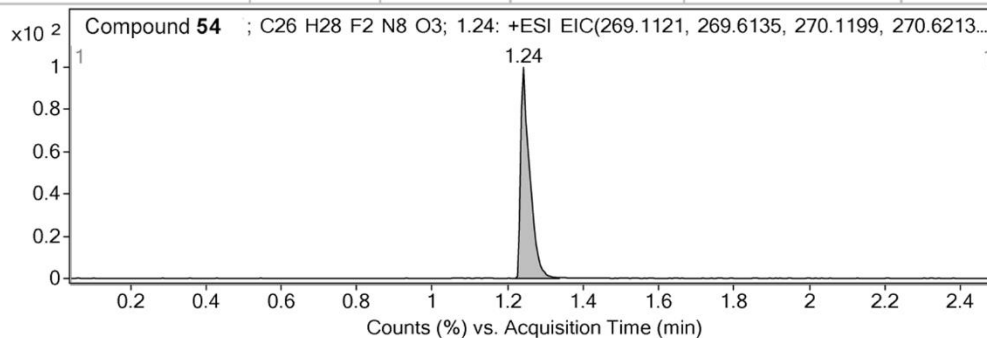

MS Zoomed Spectrum

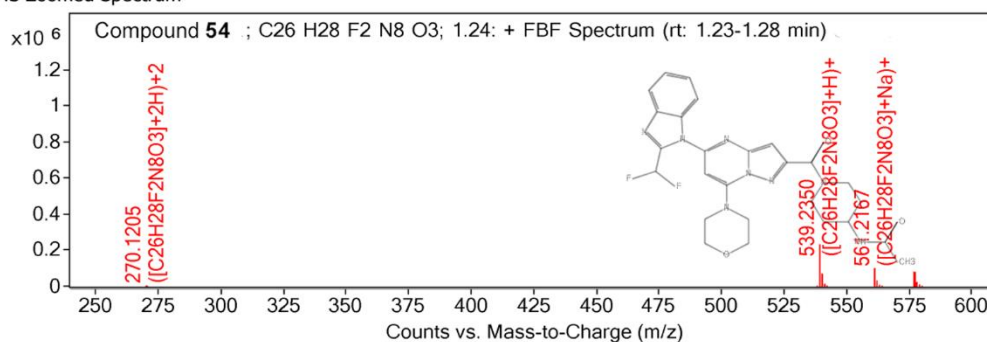

MS Zoomed Spectrum

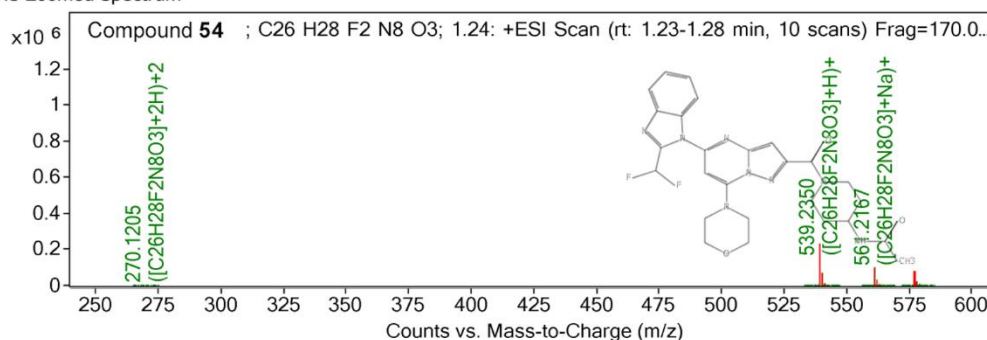

MS Spectrum Peak List

| Obs. m/z | Charge | Abund    | Formula      | Ion/Isotope | Tgt Mass Error (ppm) |
|----------|--------|----------|--------------|-------------|----------------------|
| 539.235  | 1      | 231005.8 | C26H28F2N8O3 | (M+H)+      |                      |
| 539.235  | 1      | 231005.8 | C26H28F2N8O3 | (M+H)+      | 4.65                 |

--- End Of Report ---

# Compound 55

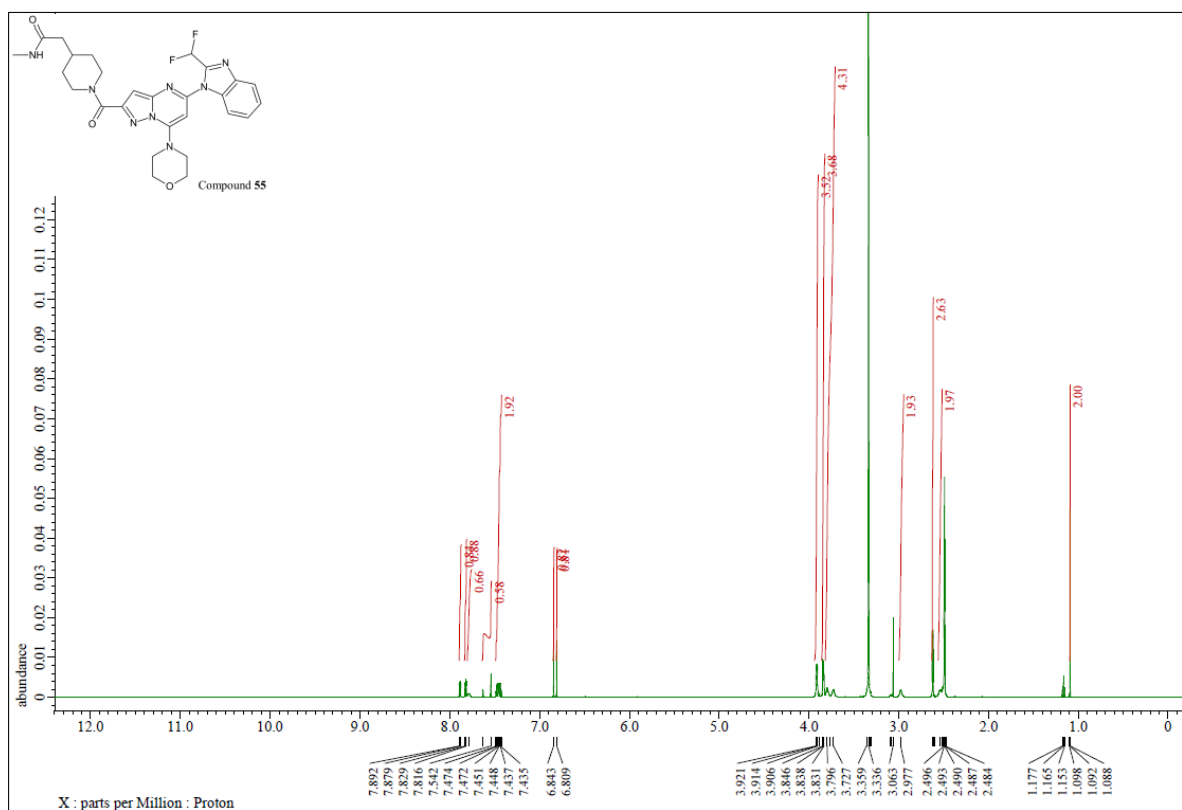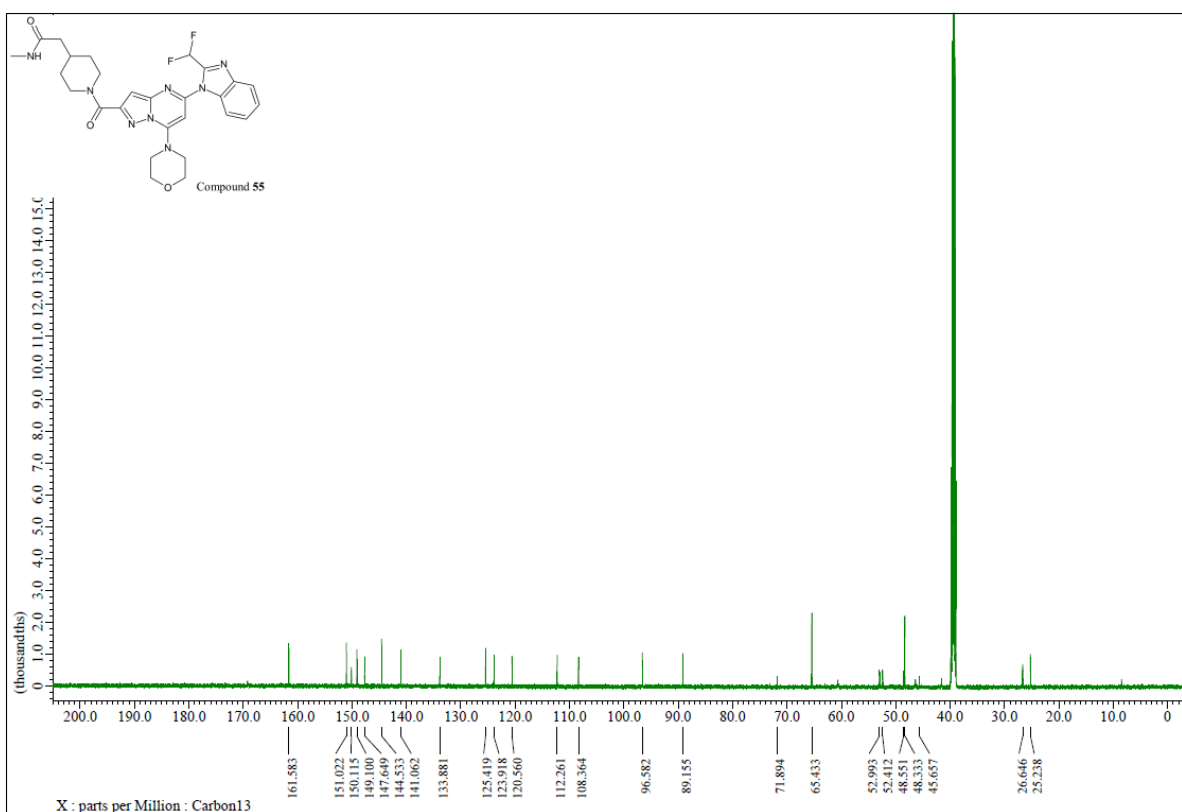

## Compound 55

| Compound Label | Name        | m/z       | RT   | Algorithm       | Mass      |
|----------------|-------------|-----------|------|-----------------|-----------|
| Compound 55    | Compound 55 | 554.24424 | 1.37 | Find by Formula | 553.23715 |

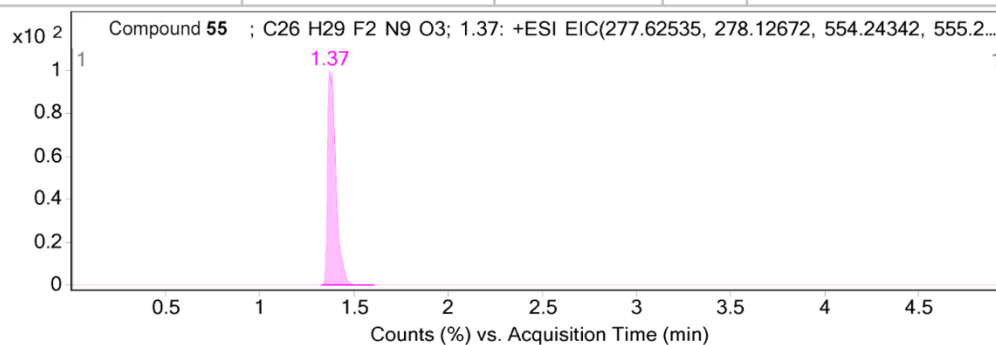

MS Zoomed Spectrum

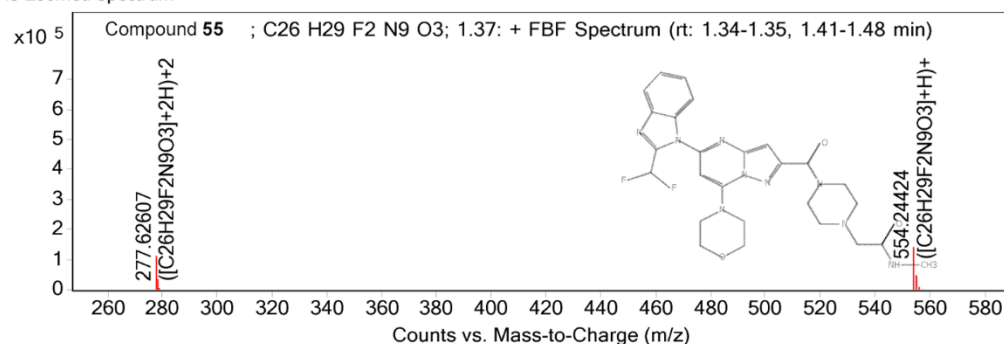

MS Zoomed Spectrum

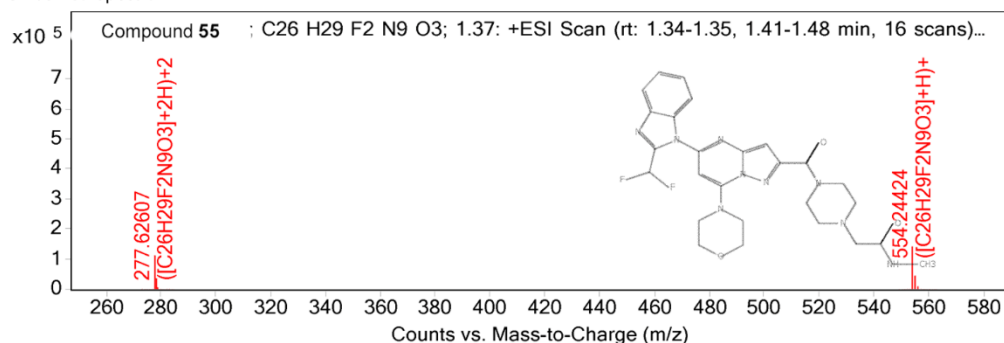

MS Spectrum Peak List

| m/z       | Calc m/z  | Diff(ppm) | z | Abund     | Formula                                                                      | Ion      |
|-----------|-----------|-----------|---|-----------|------------------------------------------------------------------------------|----------|
| 277.62607 | 277.62535 | 2.62      | 2 | 112238.74 | C <sub>26</sub> H <sub>29</sub> F <sub>2</sub> N <sub>9</sub> O <sub>3</sub> | (M+2H)+2 |
| 278.1273  | 278.12672 | 2.09      | 2 | 35826.95  | C <sub>26</sub> H <sub>29</sub> F <sub>2</sub> N <sub>9</sub> O <sub>3</sub> | (M+2H)+2 |
| 278.62837 | 278.62801 | 1.3       | 2 | 6205.88   | C <sub>26</sub> H <sub>29</sub> F <sub>2</sub> N <sub>9</sub> O <sub>3</sub> | (M+2H)+2 |
| 279.12947 | 279.12925 | 0.76      | 2 | 958.56    | C <sub>26</sub> H <sub>29</sub> F <sub>2</sub> N <sub>9</sub> O <sub>3</sub> | (M+2H)+2 |
| 279.62869 | 279.63048 | -6.4      | 2 | 61.35     | C <sub>26</sub> H <sub>29</sub> F <sub>2</sub> N <sub>9</sub> O <sub>3</sub> | (M+2H)+2 |
| 554.24424 | 554.24342 | 1.47      | 1 | 140783.94 | C <sub>26</sub> H <sub>29</sub> F <sub>2</sub> N <sub>9</sub> O <sub>3</sub> | (M+H)+   |
| 555.24673 | 555.24616 | 1.03      | 1 | 43994.18  | C <sub>26</sub> H <sub>29</sub> F <sub>2</sub> N <sub>9</sub> O <sub>3</sub> | (M+H)+   |
| 556.24896 | 556.24874 | 0.41      | 1 | 6954.29   | C <sub>26</sub> H <sub>29</sub> F <sub>2</sub> N <sub>9</sub> O <sub>3</sub> | (M+H)+   |
| 557.25101 | 557.25123 | -0.39     | 1 | 888.06    | C <sub>26</sub> H <sub>29</sub> F <sub>2</sub> N <sub>9</sub> O <sub>3</sub> | (M+H)+   |
| 558.25274 | 558.25367 | -1.68     | 1 | 85.26     | C <sub>26</sub> H <sub>29</sub> F <sub>2</sub> N <sub>9</sub> O <sub>3</sub> | (M+H)+   |

--- End Of Report ---

# Compound 56

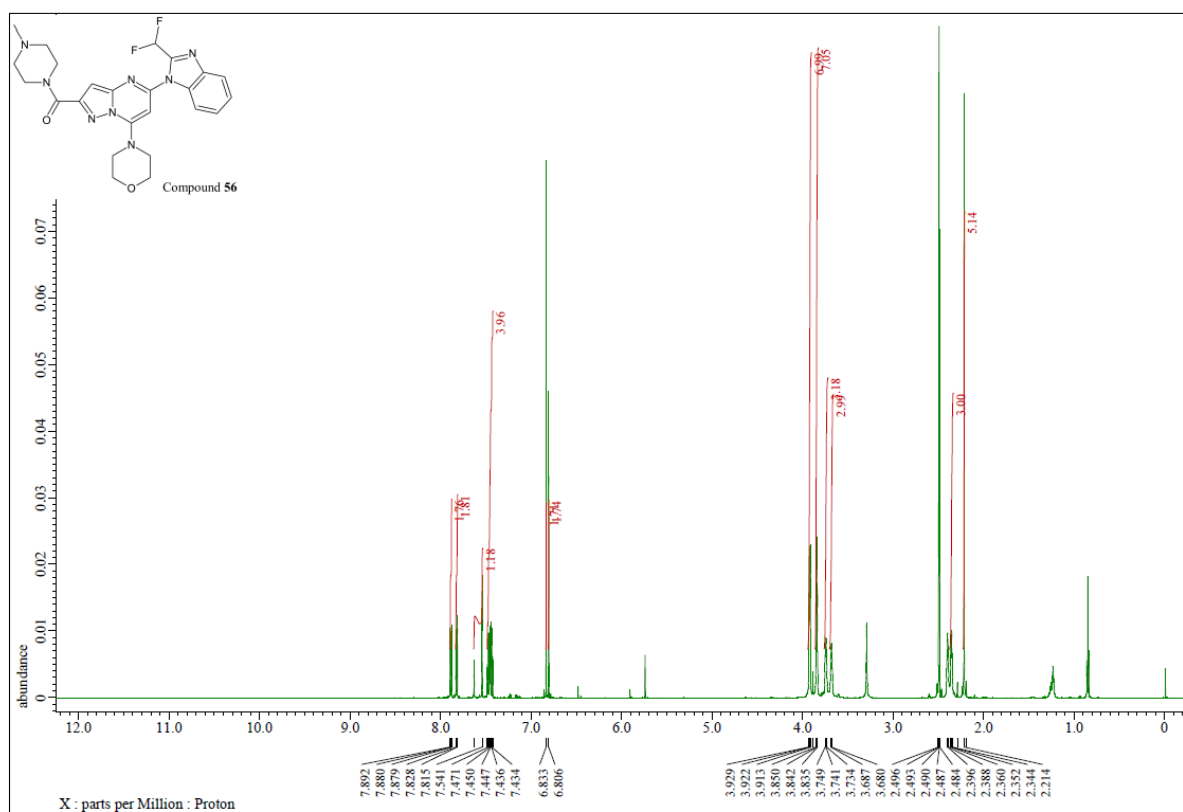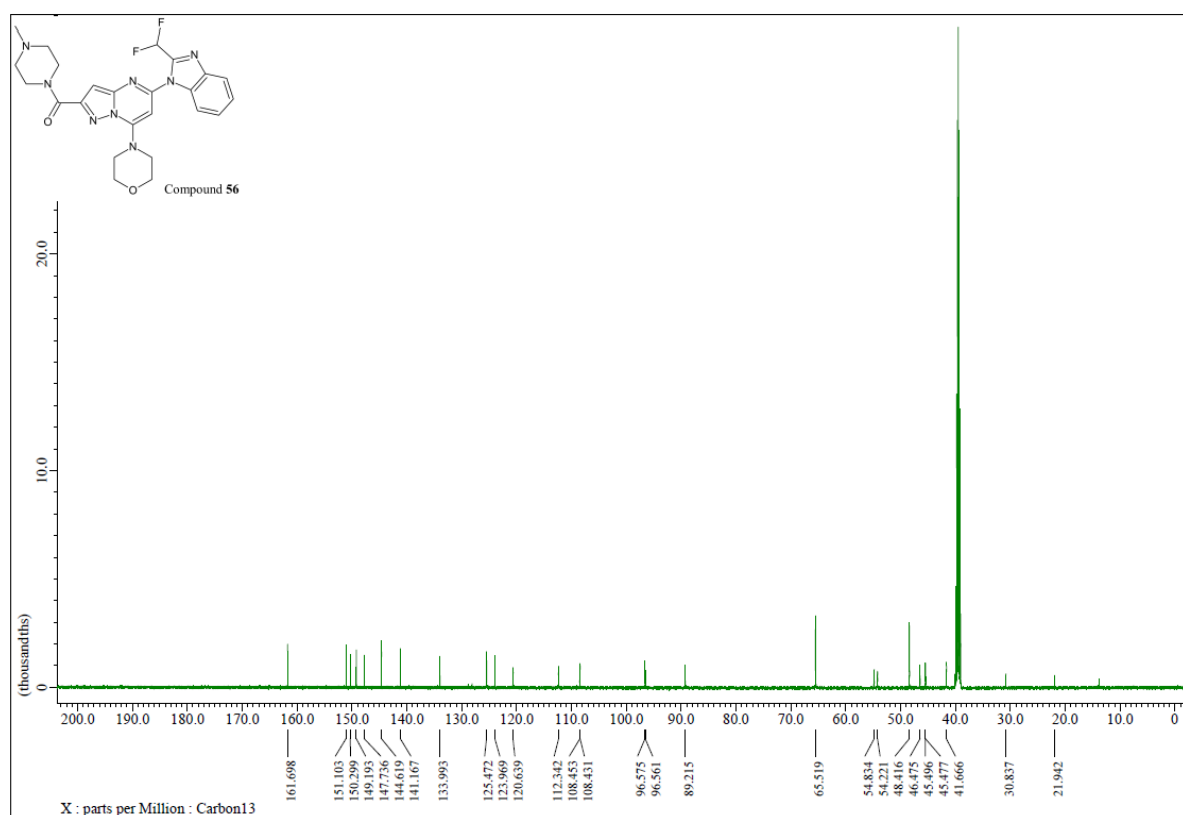

## Compound 56

| Name        | Obs. m/z  | Obs. RT | Obs. Mass | Tgt Formula      | Tgt Mass  | Tgt Mass Error | Find Cpds Algorith |
|-------------|-----------|---------|-----------|------------------|-----------|----------------|--------------------|
| Compound 56 | 497.22291 | 1.187   | 496.21558 | C24 H26 F2 N8 O2 | 496.21468 | 1.82           | Find by Formula    |

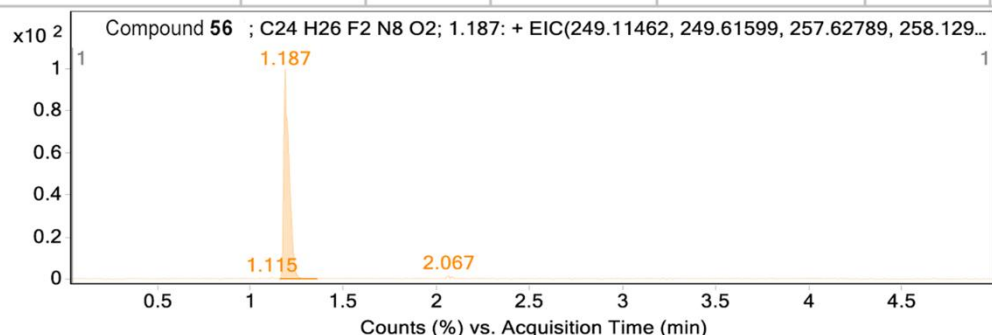

MS Zoomed Spectrum

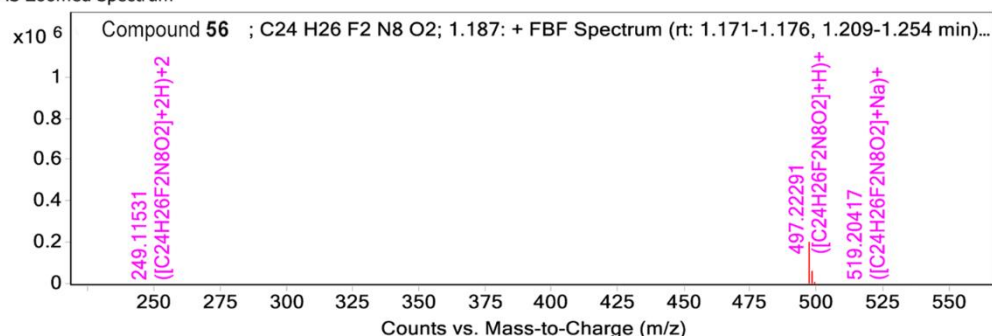

MS Zoomed Spectrum

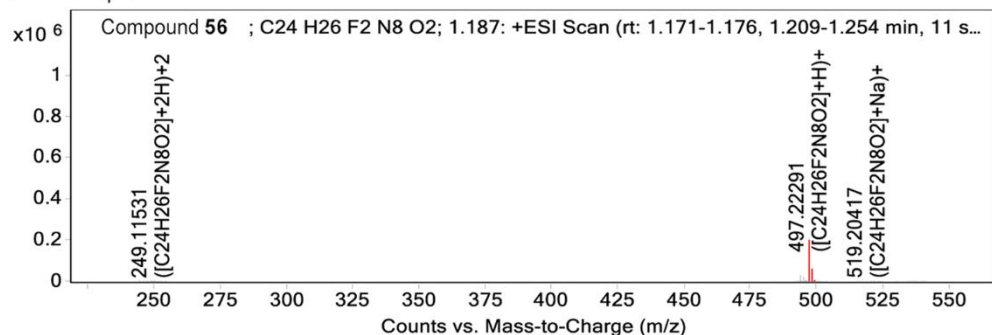

MS Spectrum Peak List

| Obs. m/z  | Charge | Abund     | Formula      | Ion/Isotope | Tgt Mass Error (ppm) |
|-----------|--------|-----------|--------------|-------------|----------------------|
| 249.11531 | 2      | 828.16    | C24H26F2N8O2 | (M+2H)+2    |                      |
| 249.61516 | 2      | 252.8     | C24H26F2N8O2 | (M+2H)+2    |                      |
| 497.22291 | 1      | 200608.11 | C24H26F2N8O2 | (M+H)+      |                      |
| 498.22553 | 1      | 53191.16  | C24H26F2N8O2 | (M+H)+      |                      |
| 499.22792 | 1      | 7197.28   | C24H26F2N8O2 | (M+H)+      |                      |
| 519.20417 | 1      | 1904.99   | C24H26F2N8O2 | (M+Na)+     |                      |
| 520.20623 | 1      | 407.84    | C24H26F2N8O2 | (M+Na)+     |                      |
| 535.17578 | 1      | 731.13    | C24H26F2N8O2 | (M+K)+      |                      |
| 536.18331 | 1      | 308.3     | C24H26F2N8O2 | (M+K)+      |                      |
| 537.17809 | 1      | 91.6      | C24H26F2N8O2 | (M+K)+      |                      |
| 249.11531 | 2      | 828.16    | C24H26F2N8O2 | (M+2H)+2    | 2.8                  |
| 249.61516 | 2      | 252.8     | C24H26F2N8O2 | (M+2H)+2    | -3.36                |
| 497.22291 | 1      | 200608.11 | C24H26F2N8O2 | (M+H)+      | 1.92                 |
| 498.22553 | 1      | 53191.16  | C24H26F2N8O2 | (M+H)+      | 1.63                 |
| 499.22792 | 1      | 7197.28   | C24H26F2N8O2 | (M+H)+      | 1.18                 |
| 519.20417 | 1      | 1904.99   | C24H26F2N8O2 | (M+Na)+     | 0.53                 |
| 520.20623 | 1      | 407.84    | C24H26F2N8O2 | (M+Na)+     | -0.82                |
| 535.17578 | 1      | 731.13    | C24H26F2N8O2 | (M+K)+      | -3.85                |
| 536.18331 | 1      | 308.3     | C24H26F2N8O2 | (M+K)+      | 5.08                 |

# Compound 57

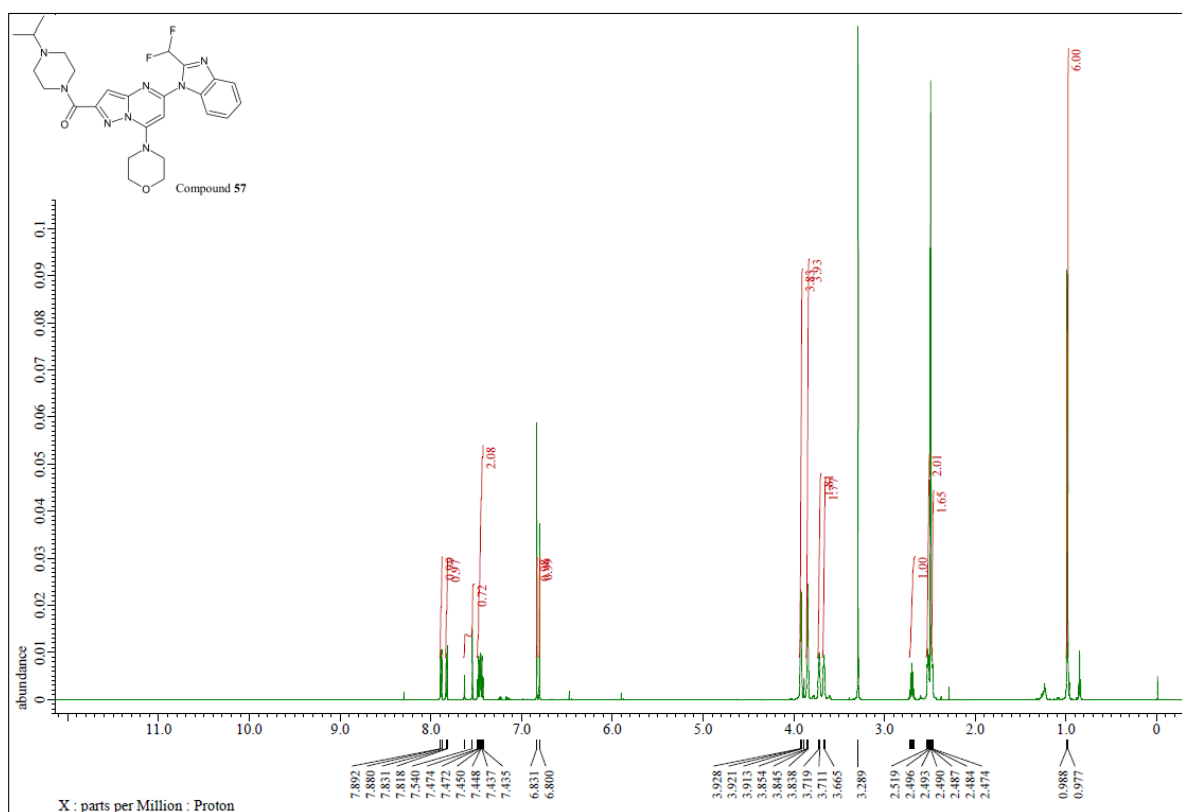

## Compound 57

| Name        | Obs. m/z  | Obs. RT | Obs. Mass | Tgt Formula      | Tgt Mass  | Tgt Mass Error | Find Cpds Algorit |
|-------------|-----------|---------|-----------|------------------|-----------|----------------|-------------------|
| Compound 57 | 525.25441 | 1.26    | 524.24697 | C26 H30 F2 N8 O2 | 524.24598 | 1.88           | Find by Formula   |

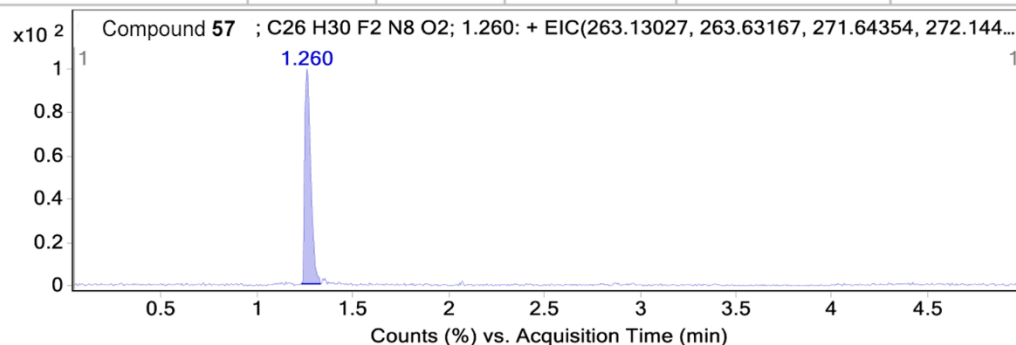

MS Zoomed Spectrum

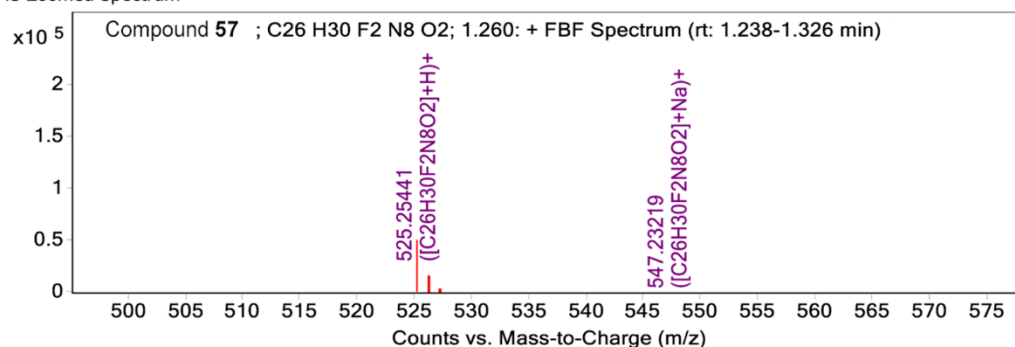

MS Zoomed Spectrum

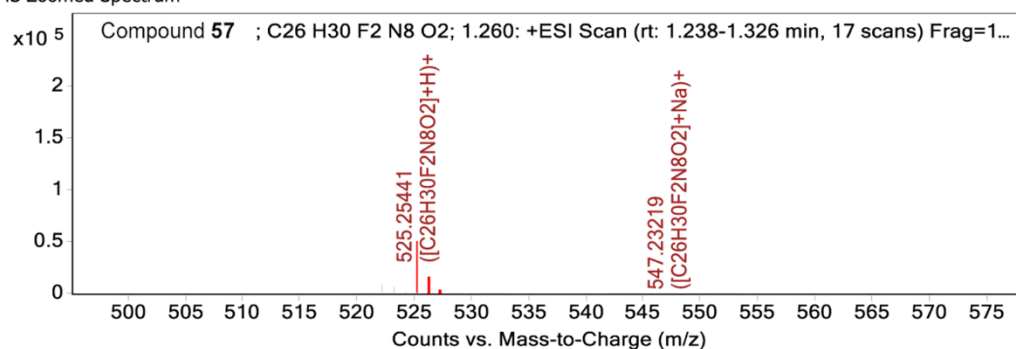

MS Spectrum Peak List

| Obs. m/z  | Charge | Abund    | Formula      | Ion/Isotope | Tgt Mass Error (ppm) |
|-----------|--------|----------|--------------|-------------|----------------------|
| 525.25441 | 1      | 49401.69 | C26H30F2N8O2 | (M+H)+      |                      |
| 526.2567  | 1      | 14426.26 | C26H30F2N8O2 | (M+H)+      |                      |
| 527.25916 | 1      | 2182.63  | C26H30F2N8O2 | (M+H)+      |                      |
| 528.25892 | 1      | 364.03   | C26H30F2N8O2 | (M+H)+      |                      |
| 547.23219 | 1      | 209.02   | C26H30F2N8O2 | (M+Na)+     |                      |
| 548.2421  | 1      | 55.47    | C26H30F2N8O2 | (M+Na)+     |                      |
| 525.25441 | 1      | 49401.69 | C26H30F2N8O2 | (M+H)+      | 2.19                 |
| 526.2567  | 1      | 14426.26 | C26H30F2N8O2 | (M+H)+      | 1.21                 |
| 527.25916 | 1      | 2182.63  | C26H30F2N8O2 | (M+H)+      | 0.8                  |
| 528.25892 | 1      | 364.03   | C26H30F2N8O2 | (M+H)+      | -4.53                |
| 547.23219 | 1      | 209.02   | C26H30F2N8O2 | (M+Na)+     | -5.5                 |
| 548.2421  | 1      | 55.47    | C26H30F2N8O2 | (M+Na)+     | 7.47                 |

--- End Of Report ---
